# Supplementary material
Source: Research Square preprint supplement (doi:10.21203/rs.3.rs-10195315/v1)
Supplement: Supplementary file 1 [file d2a7ee9b45d03bf0681a1e0e.xlsx]

## Sheet: Table S1
Supplementary Table S1 - Differentially expressed genes between cells in integrated single-cell RNA seq dataset
Gene	p_val	avg_log2FC	pct.1	pct.2	p_val_adj	Cluster
MZB1	0	6.75562	0.849	0.022	0	Plasma cell
JCHAIN	0	7.50618	0.834	0.06	0	Plasma cell
IGKC	0	9.03985	0.842	0.081	0	Plasma cell
DERL3	0	6.91879	0.747	0.011	0	Plasma cell
IGHA1	0	9.10208	0.687	0.065	0	Plasma cell
FKBP11	0	3.46275	0.713	0.095	0	Plasma cell
XBP1	0	2.9802	0.797	0.199	0	Plasma cell
SEC11C	0	3.01287	0.729	0.135	0	Plasma cell
HSP90B1	0	2.90988	0.9	0.333	0	Plasma cell
SSR4	0	3.88061	0.918	0.358	0	Plasma cell
CD79A	0	3.25932	0.606	0.05	0	Plasma cell
FKBP2	0	2.7046	0.705	0.157	0	Plasma cell
PRDX4	0	2.82511	0.637	0.097	0	Plasma cell
IGHG3	0	9.23956	0.558	0.027	0	Plasma cell
HERPUD1	0	2.56718	0.891	0.364	0	Plasma cell
TENT5C	0	1.99912	0.656	0.143	0	Plasma cell
IGHG4	0	9.55998	0.527	0.017	0	Plasma cell
IGHG1	0	8.96826	0.528	0.02	0	Plasma cell
FCRL5	0	5.62631	0.506	0.009	0	Plasma cell
SLAMF7	0	3.47615	0.523	0.033	0	Plasma cell
IGHG2	0	9.08996	0.483	0.009	0	Plasma cell
SSR3	0	1.73188	0.691	0.217	0	Plasma cell
PIM2	0	2.569	0.526	0.077	0	Plasma cell
SELENOS	0	1.53385	0.665	0.218	0	Plasma cell
ITM2C	0	1.94977	0.538	0.101	0	Plasma cell
SDF2L1	0	2.3381	0.534	0.097	0	Plasma cell
HSPA5	0	1.75684	0.746	0.309	0	Plasma cell
RRBP1	0	1.18359	0.706	0.278	0	Plasma cell
IGHA2	0	8.94583	0.44	0.017	0	Plasma cell
MT-RNR2	0	2.7619	0.451	0.035	0	Plasma cell
ERLEC1	0	1.61727	0.565	0.151	0	Plasma cell
LMAN1	0	1.34795	0.619	0.21	0	Plasma cell
SPCS1	0	1.39951	0.637	0.236	0	Plasma cell
SPCS2	0	1.56681	0.661	0.26	0	Plasma cell
PLPP5	0	2.14831	0.475	0.074	0	Plasma cell
ANKRD28	0	1.40284	0.68	0.28	0	Plasma cell
SPCS3	0	1.29773	0.597	0.206	0	Plasma cell
ISG20	0	0.889059	0.665	0.276	0	Plasma cell
PRDM1	0	1.401	0.552	0.164	0	Plasma cell
IGLC2	0	8.96647	0.415	0.027	0	Plasma cell
POU2AF1	0	4.37024	0.405	0.018	0	Plasma cell
H1FX	0	1.94321	0.579	0.194	0	Plasma cell
MANF	0	1.70831	0.51	0.128	0	Plasma cell
SPAG4	0	4.88456	0.391	0.009	0	Plasma cell
DNAJB9	0	1.57984	0.506	0.127	0	Plasma cell
CD27	0	1.93216	0.456	0.081	0	Plasma cell
MYDGF	0	1.45643	0.522	0.147	0	Plasma cell
RAB30	0	2.65945	0.441	0.066	0	Plasma cell
SEC61B	0	1.04478	0.68	0.307	0	Plasma cell
PDIA6	0	0.958608	0.595	0.225	0	Plasma cell
SEL1L	0	1.77074	0.497	0.13	0	Plasma cell
UBE2J1	0	1.56943	0.504	0.139	0	Plasma cell
ST6GAL1	0	1.8413	0.482	0.119	0	Plasma cell
IGHGP	0	8.96569	0.367	0.01	0	Plasma cell
CYTOR	0	1.72532	0.569	0.213	0	Plasma cell
TNFRSF17	0	6.54749	0.358	0.002	0	Plasma cell
TP53INP1	0	2.10917	0.43	0.083	0	Plasma cell
ATF4	0	0.574451	0.663	0.321	0	Plasma cell
HM13	0	0.964426	0.541	0.199	0	Plasma cell
RABAC1	0	1.03477	0.59	0.248	0	Plasma cell
CLPTM1L	0	1.62094	0.434	0.093	0	Plasma cell
CYBA	0	1.37156	0.741	0.4	0	Plasma cell
JSRP1	0	4.7534	0.35	0.009	0	Plasma cell
TMEM258	0	0.884803	0.613	0.272	0	Plasma cell
NUCB2	0	0.94162	0.511	0.171	0	Plasma cell
CREB3L2	0	1.69314	0.471	0.133	0	Plasma cell
SELENOK	0	0.437822	0.686	0.352	0	Plasma cell
MT-RNR1	0	3.23676	0.358	0.027	0	Plasma cell
CRELD2	0	1.64354	0.416	0.086	0	Plasma cell
TRAM1	0	0.775772	0.573	0.243	0	Plasma cell
TRIB1	0	1.4281	0.432	0.103	0	Plasma cell
RPN2	0	0.902778	0.534	0.207	0	Plasma cell
HDLBP	0	0.848887	0.571	0.245	0	Plasma cell
PPIB	0	0.719235	0.656	0.334	0	Plasma cell
CUTA	0	0.652104	0.534	0.213	0	Plasma cell
GLRX	0	1.29921	0.449	0.128	0	Plasma cell
IGLC3	0	9.32063	0.335	0.016	0	Plasma cell
PDIA4	0	1.55555	0.408	0.092	0	Plasma cell
HSPA1B	0	1.49125	0.543	0.231	0	Plasma cell
KDELR1	0	0.750924	0.494	0.182	0	Plasma cell
TMED9	0	0.766225	0.488	0.177	0	Plasma cell
SERP1	0	0.688099	0.691	0.383	0	Plasma cell
CD38	0	3.03437	0.337	0.032	0	Plasma cell
TXNDC15	0	1.25167	0.405	0.1	0	Plasma cell
GNG7	0	2.50244	0.348	0.046	0	Plasma cell
MEI1	0	3.38831	0.325	0.025	0	Plasma cell
TPD52	0	1.15704	0.445	0.149	0	Plasma cell
HIST1H1C	0	2.02174	0.408	0.112	0	Plasma cell
SELENOM	0	0.36945	0.439	0.147	0	Plasma cell
TMEM59	0	0.69616	0.611	0.319	0	Plasma cell
FNDC3A	0	0.850247	0.531	0.243	0	Plasma cell
ZBTB38	0	0.732086	0.505	0.222	0	Plasma cell
SEL1L3	0	1.3784	0.409	0.128	0	Plasma cell
ISCU	0	0.482535	0.476	0.2	0	Plasma cell
SRPRB	0	1.28429	0.348	0.074	0	Plasma cell
SEC61G	0	0.481045	0.487	0.216	0	Plasma cell
KDELR2	0	0.531397	0.435	0.167	0	Plasma cell
CPNE5	0	3.05931	0.292	0.024	0	Plasma cell
SRPRA	0	0.847098	0.405	0.139	0	Plasma cell
TMEM208	0	0.808239	0.38	0.114	0	Plasma cell
GADD45A	0	1.09817	0.448	0.186	0	Plasma cell
LY96	0	1.78598	0.315	0.053	0	Plasma cell
ERGIC3	0	0.51813	0.39	0.13	0	Plasma cell
KLHL6	0	1.99858	0.321	0.061	0	Plasma cell
TOR3A	0	2.22165	0.319	0.059	0	Plasma cell
ARSA	0	1.73489	0.304	0.045	0	Plasma cell
ICAM3	0	0.333848	0.4	0.141	0	Plasma cell
OSTC	0	0.562006	0.431	0.174	0	Plasma cell
TXNDC5	0	3.49557	0.293	0.036	0	Plasma cell
PDK1	0	2.28282	0.311	0.056	0	Plasma cell
SDC1	0	1.47599	0.304	0.051	0	Plasma cell
SPATS2	0	1.30148	0.375	0.122	0	Plasma cell
CPEB4	0	0.911291	0.452	0.2	0	Plasma cell
OS9	0	0.554058	0.42	0.169	0	Plasma cell
C8orf59	0	0.835353	0.388	0.138	0	Plasma cell
EIF2AK4	0	1.10331	0.359	0.109	0	Plasma cell
MEF2C	0	0.400807	0.413	0.164	0	Plasma cell
DUSP5	0	0.788727	0.394	0.149	0	Plasma cell
EAF2	0	2.76984	0.274	0.032	0	Plasma cell
HSH2D	0	2.36485	0.286	0.045	0	Plasma cell
ICAM2	0	1.17696	0.297	0.056	0	Plasma cell
KRTCAP2	0	0.751858	0.345	0.106	0	Plasma cell
TXNDC11	0	1.59858	0.332	0.097	0	Plasma cell
CHPF	0	1.74031	0.272	0.038	0	Plasma cell
NANS	0	0.571834	0.361	0.127	0	Plasma cell
TAGAP	0	0.525762	0.348	0.116	0	Plasma cell
SIL1	0	0.54876	0.369	0.138	0	Plasma cell
SEC61A1	0	0.914954	0.339	0.109	0	Plasma cell
DERL1	0	0.557804	0.372	0.143	0	Plasma cell
ALG5	0	0.842817	0.326	0.098	0	Plasma cell
BHLHE41	0	2.40691	0.257	0.029	0	Plasma cell
BCL2L11	0	0.845919	0.365	0.137	0	Plasma cell
ERN1	0	1.36695	0.356	0.133	0	Plasma cell
CDK2AP2	0	0.43884	0.347	0.13	0	Plasma cell
DDOST	0	0.455561	0.34	0.124	0	Plasma cell
SRM	0	1.03505	0.298	0.086	0	Plasma cell
MALAT1	0	0.477729	0.995	0.783	0	Plasma cell
ANKRD37	0	0.725757	0.343	0.133	0	Plasma cell
CCDC167	0	0.781691	0.281	0.073	0	Plasma cell
IL10RA	0	0.708188	0.319	0.113	0	Plasma cell
A1BG	0	0.708262	0.265	0.064	0	Plasma cell
TPST2	0	1.11005	0.275	0.077	0	Plasma cell
HMCES	0	1.43888	0.259	0.062	0	Plasma cell
GLA	0	1.66855	0.287	0.091	0	Plasma cell
BLNK	0	1.50948	0.253	0.06	0	Plasma cell
TMEM205	0	0.58122	0.269	0.076	0	Plasma cell
TMEM238	0	0.894081	0.257	0.064	0	Plasma cell
NME1	0	0.393285	0.271	0.081	0	Plasma cell
COMMD3	0	0.676933	0.269	0.086	0	Plasma cell
DNAJC4	0	0.717057	0.251	0.068	0	Plasma cell
LMAN2	1.97626258336499e-323	0.385293	0.427	0.178	7.2360854489909e-319	Plasma cell
HIST1H2AC	2.96439387504748e-323	1.36258	0.296	0.11	1.08541281734863e-318	Plasma cell
PHPT1	1.18575755001899e-322	0.309319	0.406	0.165	4.34165126939454e-318	Plasma cell
TMED10	1.88733076711356e-321	0.421531	0.476	0.207	6.91046160378631e-317	Plasma cell
SLC39A7	5.56317917217244e-321	0.649422	0.251	0.084	2.03695805389094e-316	Plasma cell
RPN1	6.66558092093765e-315	0.573221	0.311	0.117	2.44060245420132e-310	Plasma cell
SAR1B	1.58043844618822e-312	0.576221	0.347	0.134	5.78678e-308	Plasma cell
ALKBH7	3.59295e-306	0.264622	0.354	0.137	1.31556e-301	Plasma cell
POU2F2	3.99697e-305	0.668072	0.268	0.095	1.46349e-300	Plasma cell
RGS1	4.14411e-304	0.297886	0.564	0.278	1.51737e-299	Plasma cell
BTG2	1.39979e-293	0.603808	0.671	0.368	5.12533e-289	Plasma cell
RPS19BP1	6.40481e-290	0.619036	0.357	0.143	2.34512e-285	Plasma cell
HSPA1A	3.41086e-287	0.393281	0.585	0.328	1.24889e-282	Plasma cell
LRRC59	2.66054e-286	0.398927	0.266	0.095	9.74156e-282	Plasma cell
RPS27L	3.13077e-285	0.559021	0.504	0.235	1.14633e-280	Plasma cell
UFM1	9.38269e-285	0.39353	0.464	0.21	3.43547e-280	Plasma cell
CITED2	2.11394e-281	0.557529	0.428	0.196	7.74019e-277	Plasma cell
TYMP	3.04001e-279	0.421521	0.436	0.197	1.1131e-274	Plasma cell
SEC24A	7.71202e-276	1.10022	0.259	0.096	2.82376e-271	Plasma cell
SEC13	3.48766e-275	0.633845	0.291	0.113	1.27701e-270	Plasma cell
CCDC69	6.62575e-265	0.641749	0.255	0.095	2.42602e-260	Plasma cell
SEC14L1	7.44901e-265	0.452877	0.461	0.212	2.72745e-260	Plasma cell
PABPC4	1.75803e-262	0.432211	0.45	0.209	6.43704e-258	Plasma cell
RALGPS2	3.97839e-250	0.668877	0.363	0.158	1.45669e-245	Plasma cell
EPRS	8.74203e-249	0.876223	0.321	0.136	3.2009e-244	Plasma cell
RPS17	4.73068e-248	0.747716	0.428	0.207	1.73214e-243	Plasma cell
REEP5	5.37505e-246	0.293818	0.482	0.23	1.96808e-241	Plasma cell
EIF2AK3	1.35276e-235	1.06053	0.284	0.119	4.95313e-231	Plasma cell
RPL36AL	9.97909e-230	0.381539	0.724	0.409	3.65384e-225	Plasma cell
HSP90AA1	1.42964e-228	0.419324	0.8	0.521	5.23463e-224	Plasma cell
UBALD2	2.3718e-225	0.427629	0.38	0.174	8.68436e-221	Plasma cell
DNAJC3	2.08277e-223	0.383226	0.432	0.207	7.62606e-219	Plasma cell
UBC	8.88108e-223	0.494076	0.883	0.665	3.25181e-218	Plasma cell
MIR29B2CHG	5.8162e-216	0.590407	0.308	0.135	2.1296e-211	Plasma cell
SEC62	5.98367e-216	0.272673	0.645	0.362	2.19092e-211	Plasma cell
RPLP0	1.77856e-215	0.284761	0.776	0.454	6.51221e-211	Plasma cell
GLCCI1	2.6467e-214	1.16794	0.304	0.134	9.69089e-210	Plasma cell
ELL2	1.53776e-211	0.428503	0.571	0.302	5.63052e-207	Plasma cell
KLF13	1.74126e-208	0.328965	0.429	0.207	6.37562e-204	Plasma cell
SSR2	1.14526e-198	0.326217	0.562	0.302	4.19336e-194	Plasma cell
USP48	3.79187e-195	0.415161	0.421	0.209	1.38839e-190	Plasma cell
COPE	6.27184e-193	0.322863	0.457	0.232	2.29644e-188	Plasma cell
IFNAR2	1.71135e-189	0.358879	0.253	0.106	6.26611e-185	Plasma cell
GNL3	4.17758e-187	0.265057	0.389	0.192	1.52962e-182	Plasma cell
VOPP1	1.66523e-183	0.465399	0.325	0.15	6.09723e-179	Plasma cell
DNAJB11	3.92042e-181	0.322439	0.279	0.124	1.43546e-176	Plasma cell
RPL22L1	1.68644e-173	0.300491	0.393	0.195	6.17488e-169	Plasma cell
SUB1	1.66831e-158	0.352991	0.677	0.421	6.10853e-154	Plasma cell
CCDC88C	4.97483e-146	0.421151	0.268	0.128	1.82154e-141	Plasma cell
JUN	1.77455e-142	0.404242	0.775	0.565	6.49752e-138	Plasma cell
HSPB1	2.8542e-136	1.16331	0.423	0.27	1.04507e-131	Plasma cell
ITGA6	4.21565e-134	0.431573	0.299	0.152	1.54356e-129	Plasma cell
LARP1B	2.13681e-131	0.37872	0.276	0.138	7.82393e-127	Plasma cell
EHMT1	6.44015e-125	0.424775	0.388	0.215	2.35806e-120	Plasma cell
ZFAND2A	9.38755e-125	0.284163	0.282	0.147	3.43725e-120	Plasma cell
FBXW7	6.13704e-123	0.484902	0.458	0.262	2.24708e-118	Plasma cell
SARS	1.28983e-105	0.383662	0.286	0.153	4.7227e-101	Plasma cell
SLC5A3	2.3519e-97	0.294064	0.281	0.153	8.61149e-93	Plasma cell
MSI2	2.99817e-64	0.363895	0.351	0.219	1.09778e-59	Plasma cell
MDM2	5.59735e-59	0.487531	0.256	0.16	2.04947e-54	Plasma cell
NEAT1	4.60305e-25	0.323431	0.807	0.7	1.68541e-20	Plasma cell
HLA-DRA	0	2.55459	0.942	0.22	0	Activated B cell
MS4A1	0	4.60372	0.74	0.033	0	Activated B cell
HLA-DRB1	0	2.02682	0.862	0.252	0	Activated B cell
HLA-DPB1	0	2.06648	0.818	0.216	0	Activated B cell
HLA-DPA1	0	1.8767	0.797	0.221	0	Activated B cell
CD37	0	2.58953	0.797	0.229	0	Activated B cell
CD74	0	2.15227	0.944	0.376	0	Activated B cell
HLA-DQB1	0	2.26304	0.723	0.16	0	Activated B cell
CD83	0	2.72755	0.701	0.151	0	Activated B cell
CXCR4	0	1.26882	0.89	0.35	0	Activated B cell
CD79A	0	3.58359	0.557	0.056	0	Activated B cell
RPS20	0	2.17203	0.928	0.431	0	Activated B cell
RPL27	0	1.83039	0.925	0.441	0	Activated B cell
BANK1	0	3.65301	0.543	0.061	0	Activated B cell
HLA-DQA1	0	2.20566	0.597	0.118	0	Activated B cell
LAPTM5	0	1.65289	0.758	0.28	0	Activated B cell
RPL38	0	1.88185	0.914	0.439	0	Activated B cell
RPL34	0	1.79501	0.96	0.485	0	Activated B cell
RPS29	0	1.90449	0.949	0.475	0	Activated B cell
RPL23	0	1.79504	0.905	0.434	0	Activated B cell
RPS13	0	1.8177	0.937	0.469	0	Activated B cell
RPL27A	0	2.12008	0.949	0.481	0	Activated B cell
RPL35A	0	1.76383	0.94	0.472	0	Activated B cell
RPS11	0	2.04016	0.947	0.479	0	Activated B cell
RPL31	0	1.97927	0.896	0.43	0	Activated B cell
RPL30	0	1.8321	0.951	0.485	0	Activated B cell
RPL19	0	1.81794	0.949	0.484	0	Activated B cell
RPS23	0	2.13793	0.942	0.477	0	Activated B cell
RPS27A	0	1.70769	0.951	0.486	0	Activated B cell
RPS15A	0	1.57525	0.933	0.469	0	Activated B cell
RPS16	0	1.77755	0.949	0.486	0	Activated B cell
RPLP2	0	2.10579	0.963	0.501	0	Activated B cell
RPS12	0	1.79511	0.959	0.497	0	Activated B cell
RPL32	0	1.85151	0.945	0.484	0	Activated B cell
RPS6	0	1.88931	0.972	0.511	0	Activated B cell
RPS5	0	1.75838	0.904	0.444	0	Activated B cell
RPS21	0	1.90302	0.923	0.464	0	Activated B cell
RPL11	0	1.86444	0.955	0.496	0	Activated B cell
RPL13A	0	2.14373	0.959	0.5	0	Activated B cell
RPS14	0	1.94535	0.951	0.494	0	Activated B cell
RPS19	0	1.21634	0.951	0.496	0	Activated B cell
ZFAS1	0	2.08413	0.805	0.351	0	Activated B cell
RPLP1	0	1.64973	0.969	0.515	0	Activated B cell
RPS8	0	2.06817	0.964	0.51	0	Activated B cell
CD52	0	1.13008	0.734	0.282	0	Activated B cell
RPL23A	0	1.90498	0.905	0.454	0	Activated B cell
RPS3	0	1.73313	0.939	0.488	0	Activated B cell
RPS25	0	1.85653	0.931	0.482	0	Activated B cell
RPS18	0	1.88527	0.948	0.499	0	Activated B cell
RPL12	0	1.68439	0.928	0.48	0	Activated B cell
RPL37	0	1.73809	0.933	0.485	0	Activated B cell
RPS4X	0	1.49543	0.918	0.471	0	Activated B cell
RPL26	0	1.64462	0.926	0.48	0	Activated B cell
RPL13	0	1.65225	0.968	0.524	0	Activated B cell
RPL39	0	1.82034	0.904	0.461	0	Activated B cell
HSP90AB1	0	1.151	0.912	0.47	0	Activated B cell
RPL14	0	1.58337	0.913	0.471	0	Activated B cell
RPL3	0	1.74765	0.931	0.489	0	Activated B cell
RPL37A	0	1.67364	0.935	0.493	0	Activated B cell
RPL18	0	1.75878	0.915	0.475	0	Activated B cell
RPL35	0	1.54021	0.906	0.467	0	Activated B cell
RPL15	0	1.5066	0.906	0.468	0	Activated B cell
RPS2	0	1.78116	0.94	0.502	0	Activated B cell
RPS15	0	1.59057	0.91	0.473	0	Activated B cell
RPS27	0	1.76614	0.905	0.469	0	Activated B cell
TNFRSF13C	0	4.1305	0.468	0.032	0	Activated B cell
RPL10A	0	1.69917	0.9	0.464	0	Activated B cell
RPS7	0	1.58072	0.898	0.462	0	Activated B cell
RPL8	0	1.75797	0.916	0.481	0	Activated B cell
RPS28	0	1.76023	0.9	0.465	0	Activated B cell
RPS10	0	1.83772	0.82	0.385	0	Activated B cell
RPL28	0	1.36013	0.921	0.487	0	Activated B cell
RPL5	0	1.69132	0.925	0.492	0	Activated B cell
RPL4	0	1.55298	0.854	0.421	0	Activated B cell
RPL24	0	1.45282	0.898	0.466	0	Activated B cell
RPSA	0	1.6802	0.877	0.446	0	Activated B cell
RPL36	0	1.64087	0.887	0.457	0	Activated B cell
REL	0	1.69639	0.788	0.365	0	Activated B cell
RPL6	0	1.29268	0.897	0.474	0	Activated B cell
RPL7A	0	1.56615	0.895	0.476	0	Activated B cell
RPL22	0	1.66491	0.858	0.44	0	Activated B cell
SMAP2	0	1.46898	0.759	0.343	0	Activated B cell
RPLP0	0	1.22556	0.869	0.454	0	Activated B cell
RPS9	0	1.47595	0.904	0.491	0	Activated B cell
RPL10	0	1.53379	0.935	0.526	0	Activated B cell
CCR7	0	2.26929	0.492	0.086	0	Activated B cell
RPL29	0	1.53757	0.849	0.445	0	Activated B cell
RPL9	0	1.82309	0.866	0.462	0	Activated B cell
RPS24	0	1.24152	0.923	0.52	0	Activated B cell
LY9	0	3.37561	0.458	0.057	0	Activated B cell
RPL41	0	1.58343	0.906	0.508	0	Activated B cell
GPR183	0	1.31352	0.607	0.217	0	Activated B cell
LTB	0	1.21128	0.542	0.152	0	Activated B cell
RPS3A	0	1.70554	0.86	0.47	0	Activated B cell
HIST1H4C	0	1.59599	0.632	0.245	0	Activated B cell
RPS4Y1	0	1.46763	0.656	0.269	0	Activated B cell
CD48	0	1.74802	0.559	0.174	0	Activated B cell
EZR	0	1.55436	0.886	0.505	0	Activated B cell
RPL18A	0	1.58989	0.83	0.452	0	Activated B cell
RPL36AL	0	1.08528	0.779	0.41	0	Activated B cell
BASP1	0	1.82333	0.491	0.122	0	Activated B cell
EEF1B2	0	1.79068	0.868	0.499	0	Activated B cell
H3F3B	0	0.701739	0.887	0.518	0	Activated B cell
HSP90AA1	0	0.811686	0.885	0.52	0	Activated B cell
TOMM7	0	1.39822	0.823	0.464	0	Activated B cell
RPL7	0	1.42923	0.759	0.401	0	Activated B cell
RPL21	0	1.92688	0.809	0.457	0	Activated B cell
RPL36A	0	1.68588	0.722	0.37	0	Activated B cell
BTG1	0	0.769991	0.911	0.561	0	Activated B cell
CD55	0	1.14779	0.695	0.354	0	Activated B cell
NOP53	0	1.11527	0.684	0.349	0	Activated B cell
UBA52	0	1.13401	0.907	0.575	0	Activated B cell
IGHM	0	0.992611	0.362	0.031	0	Activated B cell
H3F3A	0	1.10654	0.785	0.455	0	Activated B cell
PFDN5	0	1.04819	0.841	0.515	0	Activated B cell
TNFRSF13B	0	4.27469	0.346	0.022	0	Activated B cell
FAU	0	1.38421	0.924	0.601	0	Activated B cell
HSPD1	0	1.10338	0.714	0.391	0	Activated B cell
JUND	0	1.08035	0.825	0.505	0	Activated B cell
HSPE1	0	1.2091	0.666	0.347	0	Activated B cell
ADAM28	0	2.01442	0.418	0.102	0	Activated B cell
MARCKS	0	1.4461	0.49	0.179	0	Activated B cell
MTRNR2L12	0	1.26325	0.682	0.375	0	Activated B cell
NACA	0	1.0656	0.877	0.571	0	Activated B cell
NPM1	0	0.872766	0.824	0.52	0	Activated B cell
CYTIP	0	0.933345	0.562	0.265	0	Activated B cell
COX7C	0	0.696409	0.793	0.498	0	Activated B cell
2007-09-01	0	1.26584	0.571	0.276	0	Activated B cell
MT-ND3	0	1.09146	0.919	0.626	0	Activated B cell
RPL22L1	0	1.8888	0.485	0.194	0	Activated B cell
STK4	0	0.831139	0.657	0.367	0	Activated B cell
RACK1	0	0.910924	0.894	0.605	0	Activated B cell
HERPUD1	0	0.924124	0.663	0.376	0	Activated B cell
MEF2C	0	1.41287	0.45	0.165	0	Activated B cell
SNHG8	0	1.30015	0.552	0.268	0	Activated B cell
SWAP70	0	1.30861	0.456	0.172	0	Activated B cell
IRF8	0	2.7587	0.341	0.059	0	Activated B cell
YPEL5	0	1.05966	0.605	0.324	0	Activated B cell
EEF1D	0	0.717701	0.8	0.521	0	Activated B cell
HLA-DRB5	0	1.31936	0.425	0.147	0	Activated B cell
MT-ND1	0	0.762215	0.913	0.635	0	Activated B cell
RPL17	0	1.57564	0.533	0.255	0	Activated B cell
CHCHD10	0	1.47754	0.442	0.17	0	Activated B cell
CMTM6	0	1.23749	0.49	0.218	0	Activated B cell
NFKBID	0	2.29561	0.359	0.087	0	Activated B cell
ODC1	0	1.28925	0.464	0.193	0	Activated B cell
RNASET2	0	1.34197	0.47	0.205	0	Activated B cell
EEF1A1	0	1.3661	0.888	0.624	0	Activated B cell
PTMA	0	1.02172	0.957	0.693	0	Activated B cell
NR4A2	0	1.24029	0.54	0.277	0	Activated B cell
MT-CO2	0	0.876398	0.95	0.69	0	Activated B cell
GRASP	0	1.787	0.372	0.113	0	Activated B cell
MT-ND4	0	0.710553	0.956	0.699	0	Activated B cell
MT-CYB	0	0.678501	0.935	0.679	0	Activated B cell
EIF1	0	0.767651	0.931	0.676	0	Activated B cell
MT-CO3	0	0.872617	0.963	0.708	0	Activated B cell
RPS17	0	1.91022	0.463	0.208	0	Activated B cell
MKNK2	0	1.33304	0.463	0.21	0	Activated B cell
RILPL2	0	1.19556	0.434	0.182	0	Activated B cell
SMDT1	0	1.32762	0.443	0.192	0	Activated B cell
SYNGR2	0	1.77767	0.374	0.124	0	Activated B cell
LYN	0	1.54556	0.386	0.14	0	Activated B cell
MT-ATP6	0	0.719005	0.953	0.708	0	Activated B cell
MT-CO1	0	0.721821	0.97	0.725	0	Activated B cell
TCEA1	0	1.2295	0.503	0.259	0	Activated B cell
RALGPS2	0	1.19835	0.397	0.159	0	Activated B cell
C6orf48	0	1.67811	0.372	0.14	0	Activated B cell
TPT1	0	0.795806	0.966	0.738	0	Activated B cell
BLK	0	3.73951	0.251	0.025	0	Activated B cell
POU2F2	0	2.14833	0.319	0.094	0	Activated B cell
HLA-DMA	0	1.4841	0.342	0.122	0	Activated B cell
MALAT1	0	1.45812	0.996	0.785	0	Activated B cell
BCL11A	0	2.21725	0.265	0.062	0	Activated B cell
ORAI2	0	2.10609	0.273	0.075	0	Activated B cell
BCL2A1	0	0.970482	0.268	0.085	0	Activated B cell
SP140	0	1.61542	0.261	0.082	0	Activated B cell
MT-ND4L	2.8556994329624e-321	0.588058	0.726	0.424	1.04561434737918e-316	Activated B cell
PNRC1	4.66397969674137e-321	0.658235	0.797	0.499	1.70771616596185e-316	Activated B cell
HINT1	6.34834624123026e-315	0.762831	0.699	0.419	2.32444697622646e-310	Activated B cell
TAGAP	5.26237399354846e-313	1.11645	0.32	0.119	0	Activated B cell
EEF2	3.55122e-308	0.70247	0.753	0.474	1.30028e-303	Activated B cell
EPB41L4A-AS1	1.73236e-307	1.7016	0.302	0.116	6.34304e-303	Activated B cell
YBX1	4.57636e-303	0.689261	0.771	0.487	1.67563e-298	Activated B cell
SERP1	7.24416e-302	0.803637	0.658	0.387	2.65245e-297	Activated B cell
PRDM2	4.01175e-301	1.07242	0.562	0.308	1.4689e-296	Activated B cell
COMMD6	2.1368e-300	0.764966	0.632	0.356	7.82388e-296	Activated B cell
OAZ1	1.77297e-292	0.651665	0.803	0.516	6.49171e-288	Activated B cell
SLC25A6	1.91076e-292	0.710461	0.665	0.392	6.99627e-288	Activated B cell
TAGLN2	8.68632e-287	0.797855	0.669	0.399	3.1805e-282	Activated B cell
KIAA1551	5.65554e-285	1.38517	0.374	0.162	2.07078e-280	Activated B cell
EMP3	1.08827e-284	1.24904	0.484	0.25	3.98468e-280	Activated B cell
H2AFZ	7.05477e-282	0.856005	0.607	0.334	2.5831e-277	Activated B cell
ANKRD13A	7.97313e-279	1.32496	0.276	0.103	2.91936e-274	Activated B cell
SNU13	1.1513e-278	0.902322	0.56	0.313	4.21547e-274	Activated B cell
MT-ND2	1.31166e-278	0.400332	0.924	0.651	4.80265e-274	Activated B cell
CYBA	7.20364e-276	0.64817	0.694	0.404	2.63761e-271	Activated B cell
SNX2	8.11675e-272	1.20016	0.387	0.177	2.97195e-267	Activated B cell
TOMM20	4.95007e-271	0.794387	0.557	0.312	1.81247e-266	Activated B cell
IFT57	9.15933e-269	1.33328	0.304	0.123	3.35369e-264	Activated B cell
STK17A	6.73823e-264	0.930581	0.532	0.29	2.4672e-259	Activated B cell
COX4I1	6.32779e-260	0.588525	0.758	0.49	2.31692e-255	Activated B cell
BTF3	4.28406e-259	0.564916	0.775	0.492	1.56861e-254	Activated B cell
GPSM3	3.78471e-258	1.18968	0.33	0.139	1.38577e-253	Activated B cell
KDM6B	9.85097e-258	1.02936	0.46	0.233	3.60693e-253	Activated B cell
HSPH1	2.20824e-256	0.941439	0.59	0.351	8.08548e-252	Activated B cell
UXT	4.19072e-254	0.966513	0.458	0.237	1.53443e-249	Activated B cell
UQCRB	5.42544e-253	0.528002	0.743	0.471	1.98652e-248	Activated B cell
EVI2B	9.45912e-248	0.919867	0.375	0.17	3.46346e-243	Activated B cell
PMAIP1	5.64758e-247	0.743091	0.399	0.185	2.06786e-242	Activated B cell
ERP29	2.194e-240	0.890184	0.489	0.267	8.03335e-236	Activated B cell
SESN3	4.70997e-238	1.09611	0.32	0.138	1.72456e-233	Activated B cell
EIF1B	1.01342e-233	0.945563	0.444	0.231	3.71065e-229	Activated B cell
RAB11FIP1	1.53688e-233	0.774718	0.463	0.238	5.62729e-229	Activated B cell
SINHCAF	1.11581e-228	1.1373	0.322	0.144	4.08555e-224	Activated B cell
RPS26	1.73503e-228	0.617594	0.641	0.381	6.3528e-224	Activated B cell
CD69	5.49899e-226	0.876398	0.449	0.229	2.01345e-221	Activated B cell
PHF1	2.0989e-223	1.17852	0.264	0.107	7.68513e-219	Activated B cell
TSC22D3	3.32871e-223	0.536244	0.761	0.505	1.21881e-218	Activated B cell
MTPN	4.57678e-221	0.950713	0.444	0.239	1.67579e-216	Activated B cell
CD53	6.86289e-219	0.79009	0.464	0.239	2.51285e-214	Activated B cell
SF1	3.29128e-218	0.758351	0.594	0.366	1.2051e-213	Activated B cell
UQCRH	1.01631e-213	0.690202	0.602	0.373	3.72121e-209	Activated B cell
DDX3Y	7.31549e-213	0.857076	0.41	0.207	2.67857e-208	Activated B cell
TUBA1B	1.15592e-212	0.571164	0.634	0.383	4.23239e-208	Activated B cell
DDX21	9.89784e-207	0.764789	0.584	0.364	3.62409e-202	Activated B cell
HLA-C	3.98171e-206	0.32068	0.887	0.608	1.4579e-201	Activated B cell
SMIM14	3.89155e-205	1.14571	0.346	0.167	1.42489e-200	Activated B cell
FNBP1	3.21857e-203	0.664121	0.611	0.377	1.17848e-198	Activated B cell
WDR74	7.19664e-203	1.3187	0.274	0.119	2.63505e-198	Activated B cell
SET	9.21583e-202	0.680282	0.605	0.377	3.37438e-197	Activated B cell
RBM38	4.65964e-199	1.12274	0.28	0.121	1.70613e-194	Activated B cell
TMEM243	8.64767e-199	1.25684	0.283	0.127	3.16634e-194	Activated B cell
ST13	2.49056e-195	0.808303	0.518	0.309	9.11918e-191	Activated B cell
NAP1L1	2.49358e-192	0.537511	0.72	0.489	9.13023e-188	Activated B cell
IER5	1.52931e-191	1.10222	0.426	0.232	5.59958e-187	Activated B cell
ANKRD37	7.14442e-191	1.0687	0.296	0.136	2.61593e-186	Activated B cell
NSA2	8.96323e-191	0.729586	0.488	0.282	3.28189e-186	Activated B cell
FAM107B	1.90794e-190	0.654917	0.564	0.341	6.98591e-186	Activated B cell
YWHAH	1.40611e-189	1.00362	0.353	0.18	5.14848e-185	Activated B cell
HLA-B	3.77052e-189	0.254936	0.952	0.67	1.38057e-184	Activated B cell
PTPN1	5.54468e-188	0.886339	0.455	0.259	2.03018e-183	Activated B cell
MTRNR2L8	1.85332e-186	0.990941	0.455	0.257	6.78594e-182	Activated B cell
SAT1	4.07438e-186	0.426564	0.819	0.613	1.49184e-181	Activated B cell
IDI1	1.35677e-185	1.0092	0.419	0.231	4.96782e-181	Activated B cell
RSL24D1	6.99886e-185	0.785474	0.457	0.26	2.56263e-180	Activated B cell
TUBA4A	1.23894e-183	0.352882	0.411	0.209	4.53637e-179	Activated B cell
KLF2	3.78075e-183	0.749357	0.45	0.251	1.38432e-178	Activated B cell
TUBA1A	1.04643e-182	0.503708	0.522	0.299	3.8315e-178	Activated B cell
ARHGAP24	1.38643e-182	0.504423	0.345	0.158	5.0764e-178	Activated B cell
2006-09-01	9.11008e-182	1.24594	0.32	0.154	3.33566e-177	Activated B cell
ATP2B1	3.82369e-181	0.722048	0.488	0.282	1.40004e-176	Activated B cell
HSPA8	3.41456e-180	0.306812	0.696	0.421	1.25024e-175	Activated B cell
EIF3F	5.87594e-180	0.687052	0.508	0.301	2.15148e-175	Activated B cell
2009-09-01	1.77458e-179	1.32039	0.26	0.116	6.49762e-175	Activated B cell
CHPT1	1.93608e-178	0.808842	0.332	0.161	7.08894e-174	Activated B cell
SYPL1	7.22951e-178	1.00561	0.295	0.141	2.64709e-173	Activated B cell
SNHG7	9.76596e-176	1.20815	0.307	0.151	3.5758e-171	Activated B cell
UBXN1	1.31324e-174	0.676342	0.478	0.279	4.80843e-170	Activated B cell
SERPINB9	4.19887e-174	0.794227	0.344	0.173	1.53742e-169	Activated B cell
RAN	1.3721e-172	0.504434	0.578	0.36	5.02393e-168	Activated B cell
CTSS	1.00101e-171	0.490644	0.382	0.201	3.66518e-167	Activated B cell
HMGB1	3.71776e-170	0.481454	0.756	0.538	1.36126e-165	Activated B cell
ARPC3	7.61923e-168	0.573529	0.604	0.387	2.78978e-163	Activated B cell
PTGES3	2.59538e-167	0.654483	0.625	0.427	9.503e-163	Activated B cell
BCL2	9.68502e-167	0.651782	0.344	0.172	3.54617e-162	Activated B cell
MIR29B2CHG	1.37493e-166	1.11996	0.288	0.137	5.03432e-162	Activated B cell
AC058791.1	6.80312e-164	0.788231	0.381	0.203	2.49096e-159	Activated B cell
HMGN1	1.88322e-160	0.581334	0.55	0.347	6.89542e-156	Activated B cell
CCDC107	6.83024e-160	0.965342	0.317	0.162	2.50089e-155	Activated B cell
NGLY1	5.1539e-158	1.23336	0.29	0.146	1.8871e-153	Activated B cell
CORO1A	7.00707e-155	0.423874	0.422	0.224	2.56564e-150	Activated B cell
EIF3E	8.52514e-153	0.585559	0.58	0.389	3.12148e-148	Activated B cell
IDS	5.73694e-151	0.62338	0.482	0.295	2.10058e-146	Activated B cell
UCP2	7.76322e-151	0.991068	0.256	0.119	2.8425e-146	Activated B cell
TRIR	9.81927e-151	0.578684	0.524	0.328	3.59533e-146	Activated B cell
EIF3K	3.0832e-149	0.465761	0.588	0.381	1.12891e-144	Activated B cell
DDT	3.76141e-149	0.944161	0.334	0.181	1.37724e-144	Activated B cell
CCNI	6.96101e-145	0.514056	0.664	0.468	2.54877e-140	Activated B cell
FMNL1	1.94973e-144	0.885061	0.297	0.15	7.13894e-140	Activated B cell
LSM7	5.21719e-144	0.885838	0.382	0.222	1.91027e-139	Activated B cell
RASGEF1B	1.03202e-141	0.761228	0.313	0.163	3.77875e-137	Activated B cell
CTSZ	1.05168e-141	0.928915	0.275	0.139	3.85074e-137	Activated B cell
C8orf59	4.35813e-141	1.36581	0.278	0.144	1.59573e-136	Activated B cell
GRB2	3.9507e-138	0.722172	0.466	0.29	1.44655e-133	Activated B cell
RHOH	1.01206e-136	0.786823	0.344	0.187	3.70565e-132	Activated B cell
EIF3L	4.922e-136	0.852838	0.365	0.212	1.80219e-131	Activated B cell
RBM8A	1.49227e-135	0.488027	0.539	0.347	5.46393e-131	Activated B cell
SLBP	2.71871e-135	0.959102	0.295	0.156	9.95454e-131	Activated B cell
YWHAZ	3.62993e-135	0.449373	0.748	0.565	1.3291e-130	Activated B cell
LIMD2	1.30421e-133	0.84036	0.289	0.146	4.77537e-129	Activated B cell
BIRC3	7.06029e-133	0.513798	0.488	0.302	2.58512e-128	Activated B cell
ARF6	1.07404e-131	0.615877	0.404	0.238	3.93259e-127	Activated B cell
ACAP1	5.66265e-130	0.564984	0.322	0.169	2.07338e-125	Activated B cell
PRMT1	1.5229e-129	0.969335	0.286	0.153	5.57611e-125	Activated B cell
FYTTD1	7.7434e-128	0.896159	0.279	0.146	2.83525e-123	Activated B cell
CHORDC1	5.5359e-127	0.627324	0.422	0.26	2.02697e-122	Activated B cell
PDE4B	3.26599e-126	0.621865	0.434	0.26	1.19584e-121	Activated B cell
C19orf53	3.15442e-124	0.532048	0.427	0.261	1.15499e-119	Activated B cell
SRSF7	1.53064e-123	0.283643	0.675	0.471	5.60445e-119	Activated B cell
CDC42	3.27034e-123	0.529839	0.554	0.369	1.19744e-118	Activated B cell
ISG20	4.43833e-123	0.517347	0.464	0.286	1.62509e-118	Activated B cell
HSPA4	5.05059e-123	1.08242	0.331	0.192	1.84927e-118	Activated B cell
TXNIP	5.6899e-121	0.497055	0.656	0.477	2.08336e-116	Activated B cell
RHOG	1.34713e-120	0.772593	0.304	0.165	4.93253e-116	Activated B cell
PARP14	3.01158e-120	0.675932	0.413	0.252	1.10269e-115	Activated B cell
CTSH	1.17387e-119	0.761218	0.281	0.15	4.29812e-115	Activated B cell
GPX4	3.81969e-119	0.39287	0.5	0.317	1.39858e-114	Activated B cell
ST6GAL1	3.73868e-118	0.655035	0.257	0.129	1.36892e-113	Activated B cell
CYCS	8.61208e-117	0.359004	0.51	0.333	3.15331e-112	Activated B cell
ADGRE5	3.40918e-116	0.595253	0.382	0.228	1.24827e-111	Activated B cell
ZNF331	5.44145e-116	0.780371	0.405	0.252	1.99239e-111	Activated B cell
FKBP4	2.14915e-115	0.809486	0.288	0.157	7.86913e-111	Activated B cell
MARCKSL1	2.43461e-115	0.937224	0.257	0.134	8.91434e-111	Activated B cell
UPF2	3.5599e-115	0.645692	0.363	0.217	1.30346e-110	Activated B cell
MOB1A	6.25774e-113	0.725227	0.367	0.222	2.29127e-108	Activated B cell
CCDC50	9.50075e-112	0.699038	0.329	0.189	3.4787e-107	Activated B cell
PPIA	4.37685e-110	0.317425	0.678	0.47	1.60258e-105	Activated B cell
ALKBH7	4.44128e-109	0.857951	0.26	0.142	1.62617e-104	Activated B cell
UBE2I	1.13056e-108	0.639231	0.369	0.227	4.13954e-104	Activated B cell
TUT4	1.47673e-108	0.516841	0.417	0.257	5.40704e-104	Activated B cell
CRIP1	1.02529e-107	0.629646	0.324	0.188	3.75408e-103	Activated B cell
TAF1D	2.81087e-107	0.445411	0.573	0.406	1.0292e-102	Activated B cell
FBL	6.71192e-107	0.630493	0.282	0.156	2.45757e-102	Activated B cell
ANP32B	8.44464e-107	0.399165	0.488	0.326	3.09201e-102	Activated B cell
UBALD2	4.27892e-106	0.767425	0.307	0.178	1.56673e-101	Activated B cell
SELENOK	4.34652e-103	0.354163	0.537	0.36	1.59148e-98	Activated B cell
SNRPG	1.00092e-100	0.527041	0.401	0.254	3.66488e-96	Activated B cell
TRIM38	1.01739e-100	0.790829	0.275	0.154	3.72518e-96	Activated B cell
TMA7	3.087e-100	0.305623	0.608	0.413	1.1303e-95	Activated B cell
SKIL	1.65688e-99	0.602893	0.446	0.297	6.06666e-95	Activated B cell
RNMT	2.17357e-99	0.678935	0.373	0.236	7.95851e-95	Activated B cell
BCAS2	2.51906e-99	0.711774	0.34	0.208	9.22355e-95	Activated B cell
HNRNPA1	5.50358e-99	0.310376	0.638	0.452	2.01514e-94	Activated B cell
SNX3	7.97269e-99	0.562396	0.401	0.258	2.9192e-94	Activated B cell
EIF4B	8.00592e-99	0.467438	0.476	0.323	2.93137e-94	Activated B cell
PHF20	4.83946e-98	0.468302	0.421	0.269	1.77197e-93	Activated B cell
GPBP1	2.13274e-96	0.389873	0.635	0.469	7.80904e-92	Activated B cell
ATP5MC2	1.34897e-94	0.321192	0.547	0.373	4.93924e-90	Activated B cell
COX17	9.66071e-94	0.56161	0.306	0.182	3.53727e-89	Activated B cell
SUMO2	1.21085e-93	0.319892	0.56	0.379	4.43352e-89	Activated B cell
SNHG12	4.61336e-93	1.03267	0.25	0.14	1.68918e-88	Activated B cell
ANKRD44	8.05783e-93	0.562605	0.33	0.195	2.95038e-88	Activated B cell
GNAS	2.90975e-90	0.282957	0.714	0.54	1.06541e-85	Activated B cell
ARL4A	6.2843e-90	0.630865	0.285	0.166	2.301e-85	Activated B cell
ATP5MG	4.88427e-88	0.25097	0.632	0.439	1.78838e-83	Activated B cell
SYF2	1.40702e-87	0.331802	0.424	0.276	5.1518e-83	Activated B cell
NASP	1.4087e-87	0.416242	0.5	0.346	5.15796e-83	Activated B cell
CREBRF	3.0725e-87	0.532334	0.399	0.266	1.125e-82	Activated B cell
RSRC2	3.8874e-87	0.371055	0.543	0.393	1.42337e-82	Activated B cell
MZT2B	4.06571e-87	0.334782	0.45	0.297	1.48866e-82	Activated B cell
BOD1L1	9.06193e-87	0.474362	0.416	0.277	3.31803e-82	Activated B cell
SMCHD1	3.80609e-86	0.443254	0.606	0.443	1.3936e-81	Activated B cell
EIF3D	1.40796e-85	0.453444	0.363	0.233	5.15524e-81	Activated B cell
OSER1	1.75341e-85	0.769386	0.253	0.146	6.42012e-81	Activated B cell
TAF7	9.94935e-85	0.430168	0.389	0.253	3.64295e-80	Activated B cell
TUBB4B	1.22512e-84	0.316659	0.561	0.396	4.48577e-80	Activated B cell
LAMTOR5	8.97671e-83	0.546006	0.333	0.21	3.28682e-78	Activated B cell
PLP2	2.52484e-82	0.507012	0.321	0.2	9.24471e-78	Activated B cell
UBE2B	2.12457e-81	0.361602	0.539	0.389	7.77912e-77	Activated B cell
CDC42SE2	4.57871e-81	0.394368	0.477	0.326	1.67649e-76	Activated B cell
HNRNPA0	9.59718e-79	0.446903	0.394	0.26	3.51401e-74	Activated B cell
TPI1	2.6302e-77	0.843959	0.476	0.359	9.63049e-73	Activated B cell
FUS	3.014e-75	0.401569	0.652	0.5	1.10358e-70	Activated B cell
ATP6V1G1	4.65267e-75	0.364215	0.454	0.315	1.70358e-70	Activated B cell
SRRM1	4.88655e-73	0.273029	0.552	0.407	1.78921e-68	Activated B cell
PARP1	9.34902e-73	0.553814	0.258	0.153	3.42314e-68	Activated B cell
WBP11	1.68453e-72	0.468805	0.292	0.182	6.1679e-68	Activated B cell
VASP	8.00089e-71	0.631522	0.288	0.179	2.92953e-66	Activated B cell
ARPP19	7.17644e-69	0.504223	0.309	0.199	2.62765e-64	Activated B cell
JOSD1	3.46151e-68	0.561751	0.325	0.215	1.26743e-63	Activated B cell
DDX3X	6.66328e-68	0.307813	0.587	0.44	2.43976e-63	Activated B cell
UBE2A	1.63632e-67	0.476376	0.32	0.209	5.99139e-63	Activated B cell
TRMT112	3.33689e-67	0.284429	0.393	0.266	1.2218e-62	Activated B cell
DNAJB6	3.42343e-67	0.415603	0.52	0.39	1.25349e-62	Activated B cell
KLF6	7.58861e-67	0.273128	0.721	0.588	2.77857e-62	Activated B cell
FXYD5	1.23056e-66	0.290085	0.405	0.273	4.50569e-62	Activated B cell
NDUFB11	9.29934e-66	0.340559	0.387	0.263	3.40495e-61	Activated B cell
UBE2N	4.39805e-65	0.58335	0.3	0.196	1.61035e-60	Activated B cell
YPEL3	7.50008e-65	0.577163	0.26	0.162	2.74615e-60	Activated B cell
DDX27	1.04162e-64	0.436793	0.283	0.18	3.8139e-60	Activated B cell
EIF3G	1.48176e-64	0.385226	0.387	0.266	5.42547e-60	Activated B cell
TGFB1	1.64459e-64	0.414492	0.34	0.225	6.02166e-60	Activated B cell
ATP6V0B	6.00169e-64	0.467673	0.344	0.233	2.19752e-59	Activated B cell
HNRNPK	1.5119e-63	0.268502	0.591	0.443	5.53581e-59	Activated B cell
EIF2S3	1.14511e-62	0.47743	0.288	0.187	4.19282e-58	Activated B cell
HIGD2A	1.84182e-62	0.43087	0.323	0.214	6.74382e-58	Activated B cell
CKS2	5.82852e-62	0.489435	0.258	0.16	2.13411e-57	Activated B cell
PPDPF	5.67528e-61	0.317894	0.489	0.366	2.07801e-56	Activated B cell
SP110	1.11285e-60	0.831905	0.25	0.157	4.07468e-56	Activated B cell
MAP1LC3B	9.72977e-60	0.262448	0.494	0.358	3.56256e-55	Activated B cell
CHD4	4.22983e-59	0.488432	0.311	0.209	1.54875e-54	Activated B cell
HSPA9	4.51886e-59	0.800022	0.332	0.231	1.65458e-54	Activated B cell
PNRC2	6.0913e-57	0.42939	0.328	0.223	2.23033e-52	Activated B cell
ANP32E	8.31911e-56	0.345386	0.287	0.188	3.04604e-51	Activated B cell
RHOA	1.41186e-55	0.256939	0.571	0.44	5.16954e-51	Activated B cell
SQSTM1	3.4318e-54	0.251771	0.567	0.432	1.25655e-49	Activated B cell
ISCU	2.28873e-52	0.280903	0.308	0.208	8.3802e-48	Activated B cell
UFC1	2.51887e-52	0.410804	0.316	0.218	9.22286e-48	Activated B cell
FAM133B	3.75504e-52	0.458163	0.419	0.314	1.37491e-47	Activated B cell
RGS2	6.22035e-52	0.334971	0.374	0.265	2.27758e-47	Activated B cell
AHSA1	1.07661e-51	0.377638	0.301	0.205	3.94201e-47	Activated B cell
CCT8	3.26255e-50	0.440878	0.304	0.21	1.19458e-45	Activated B cell
AC016831.5	2.45305e-49	0.549227	0.27	0.18	8.98183e-45	Activated B cell
MBP	2.98699e-48	0.309232	0.366	0.26	1.09369e-43	Activated B cell
DDX6	4.20989e-48	0.266044	0.392	0.285	1.54145e-43	Activated B cell
TRIM22	1.33683e-47	0.334494	0.273	0.181	4.89479e-43	Activated B cell
PIM3	2.57538e-47	0.297379	0.328	0.229	9.42976e-43	Activated B cell
DDX18	2.90754e-47	0.393364	0.356	0.259	1.06459e-42	Activated B cell
PGK1	4.4104e-47	0.374288	0.461	0.354	1.61487e-42	Activated B cell
MED10	1.09923e-46	0.44732	0.272	0.184	4.02484e-42	Activated B cell
CEBPZ	1.41998e-46	0.295308	0.329	0.232	5.19927e-42	Activated B cell
ANAPC16	1.86003e-46	0.291294	0.435	0.329	6.81049e-42	Activated B cell
MIS18BP1	1.15293e-45	0.423534	0.285	0.195	4.22146e-41	Activated B cell
ABCF1	3.51521e-45	0.291076	0.294	0.204	1.28709e-40	Activated B cell
MECP2	3.86425e-45	0.267576	0.328	0.23	1.4149e-40	Activated B cell
ATP5F1D	9.26165e-45	0.328731	0.365	0.266	3.39115e-40	Activated B cell
DNAJC8	1.43951e-42	0.294865	0.325	0.234	5.27076e-38	Activated B cell
CDC42SE1	1.4567e-42	0.311387	0.279	0.191	5.33372e-38	Activated B cell
MZT2A	4.08371e-42	0.355505	0.269	0.184	1.49525e-37	Activated B cell
TCP1	9.8066e-41	0.274282	0.351	0.257	3.59069e-36	Activated B cell
CCDC59	1.63636e-40	0.29685	0.288	0.202	5.99154e-36	Activated B cell
VAMP2	1.99753e-40	0.38401	0.292	0.207	7.31394e-36	Activated B cell
BNIP3L	5.03625e-40	0.503443	0.262	0.186	1.84402e-35	Activated B cell
SRSF9	1.25141e-39	0.371823	0.312	0.225	4.58202e-35	Activated B cell
PSIP1	5.77606e-39	0.261892	0.263	0.182	2.1149e-34	Activated B cell
SELENOT	1.1349e-38	0.445523	0.273	0.194	4.15544e-34	Activated B cell
MRPS6	6.31439e-38	0.364532	0.28	0.199	2.31201e-33	Activated B cell
MDM4	4.21433e-37	0.338296	0.298	0.215	1.54308e-32	Activated B cell
CD47	9.10354e-37	0.314048	0.356	0.265	3.33326e-32	Activated B cell
PRR13	3.847e-36	0.337649	0.265	0.187	1.40858e-31	Activated B cell
MRPL18	5.93867e-36	0.359823	0.251	0.177	2.17445e-31	Activated B cell
ATG12	8.16879e-34	0.268309	0.276	0.199	2.991e-29	Activated B cell
PDE7A	5.4684e-33	0.355563	0.269	0.19	2.00226e-28	Activated B cell
UBE2S	6.82618e-33	0.341461	0.332	0.247	2.49941e-28	Activated B cell
BACH1	1.9143e-32	0.270407	0.321	0.237	7.00919e-28	Activated B cell
ARHGDIA	3.40621e-27	0.270456	0.286	0.216	1.24718e-22	Activated B cell
ATP1B3	6.06892e-25	0.297455	0.454	0.372	2.22214e-20	Activated B cell
GTF2B	6.57751e-24	0.320453	0.289	0.223	2.40836e-19	Activated B cell
PLCG2	9.41971e-22	0.269828	0.483	0.404	3.44903e-17	Activated B cell
C9orf16	1.9817e-21	0.260564	0.256	0.194	7.25599e-17	Activated B cell
AES	6.66812e-19	0.277916	0.265	0.205	2.44153e-14	Activated B cell
ATP5MPL	3.6377e-13	0.406851	0.26	0.214	1.33194e-08	Activated B cell
ATP5MD	1.39271e-12	0.326458	0.298	0.248	5.0994e-08	Activated B cell
MS4A1	0	4.80299	0.855	0.031	0	Naive B cell
HLA-DQA1	0	3.43915	0.892	0.11	0	Naive B cell
HLA-DQB1	0	3.26081	0.927	0.155	0	Naive B cell
HLA-DRA	0	3.34562	0.992	0.22	0	Naive B cell
BANK1	0	4.23913	0.803	0.055	0	Naive B cell
HLA-DPB1	0	2.63623	0.942	0.214	0	Naive B cell
HLA-DPA1	0	2.59715	0.943	0.218	0	Naive B cell
HLA-DRB1	0	2.62594	0.971	0.25	0	Naive B cell
CD83	0	3.14215	0.859	0.147	0	Naive B cell
CD79A	0	4.1176	0.762	0.051	0	Naive B cell
CD37	0	2.701	0.902	0.228	0	Naive B cell
HLA-DRB5	0	2.51706	0.762	0.138	0	Naive B cell
TNFRSF13C	0	4.88517	0.648	0.028	0	Naive B cell
CD74	0	2.63324	0.995	0.376	0	Naive B cell
CXCR4	0	1.22747	0.962	0.35	0	Naive B cell
LAPTM5	0	1.89453	0.885	0.278	0	Naive B cell
LY9	0	4.1902	0.654	0.052	0	Naive B cell
CCR7	0	3.18758	0.669	0.082	0	Naive B cell
CD52	0	1.29632	0.847	0.28	0	Naive B cell
REL	0	2.00636	0.914	0.363	0	Naive B cell
BASP1	0	2.45266	0.664	0.118	0	Naive B cell
SMAP2	0	1.68987	0.87	0.341	0	Naive B cell
RPS20	0	1.99914	0.959	0.431	0	Naive B cell
RPL27	0	1.82195	0.963	0.441	0	Naive B cell
RPL23	0	1.70998	0.955	0.434	0	Naive B cell
LTB	0	1.55001	0.67	0.15	0	Naive B cell
RPS5	0	1.74029	0.962	0.444	0	Naive B cell
RPL38	0	1.90567	0.957	0.44	0	Naive B cell
CD48	0	2.04101	0.686	0.171	0	Naive B cell
RPS10	0	1.37788	0.898	0.384	0	Naive B cell
GPR183	0	1.56633	0.725	0.215	0	Naive B cell
RPSA	0	1.74917	0.951	0.445	0	Naive B cell
RPL35A	0	1.63817	0.977	0.472	0	Naive B cell
RPS13	0	1.73461	0.974	0.469	0	Naive B cell
RPL23A	0	2.23643	0.958	0.454	0	Naive B cell
RPS4X	0	1.37986	0.975	0.471	0	Naive B cell
CD55	0	1.63969	0.853	0.35	0	Naive B cell
RPS11	0	1.97986	0.983	0.48	0	Naive B cell
RPL22	0	1.76521	0.942	0.439	0	Naive B cell
RPS21	0	1.90225	0.967	0.464	0	Naive B cell
RPS29	0	2.13392	0.978	0.476	0	Naive B cell
RPL34	0	1.70959	0.986	0.486	0	Naive B cell
RPS23	0	2.10206	0.977	0.477	0	Naive B cell
RPL10A	0	1.64691	0.961	0.463	0	Naive B cell
RPL4	0	1.48449	0.918	0.421	0	Naive B cell
RPS15A	0	1.45257	0.967	0.47	0	Naive B cell
RPS7	0	1.65477	0.958	0.461	0	Naive B cell
RPL19	0	1.75543	0.981	0.485	0	Naive B cell
RPL29	0	1.53237	0.94	0.444	0	Naive B cell
RPL7	0	1.63514	0.893	0.398	0	Naive B cell
RPL36	0	1.6245	0.951	0.456	0	Naive B cell
RPL39	0	1.87826	0.956	0.461	0	Naive B cell
RPL31	0	1.67497	0.924	0.43	0	Naive B cell
RPL14	0	1.49247	0.965	0.471	0	Naive B cell
RPL27A	0	2.0681	0.975	0.481	0	Naive B cell
RPL32	0	1.79869	0.978	0.484	0	Naive B cell
RPS16	0	1.59162	0.981	0.487	0	Naive B cell
RPL15	0	1.57226	0.962	0.468	0	Naive B cell
RPS28	0	1.76861	0.958	0.464	0	Naive B cell
HSP90AB1	0	1.20228	0.962	0.469	0	Naive B cell
RPS27A	0	1.66708	0.98	0.487	0	Naive B cell
RPL30	0	1.81774	0.978	0.486	0	Naive B cell
RPL35	0	1.53198	0.959	0.467	0	Naive B cell
IRF8	0	3.48738	0.544	0.053	0	Naive B cell
RPL18	0	1.69193	0.966	0.475	0	Naive B cell
RPS15	0	1.47572	0.964	0.473	0	Naive B cell
RPL12	0	1.50842	0.97	0.48	0	Naive B cell
RPL24	0	1.43484	0.956	0.466	0	Naive B cell
RPL8	0	1.64746	0.968	0.48	0	Naive B cell
RPS3	0	1.60895	0.976	0.488	0	Naive B cell
RPL3	0	1.70034	0.976	0.489	0	Naive B cell
RPL11	0	1.79603	0.983	0.497	0	Naive B cell
RPS14	0	1.82709	0.981	0.495	0	Naive B cell
RPL9	0	1.8341	0.947	0.461	0	Naive B cell
RPL6	0	1.36474	0.958	0.473	0	Naive B cell
RPLP2	0	1.9134	0.987	0.502	0	Naive B cell
RPS12	0	1.63449	0.983	0.498	0	Naive B cell
RPS27	0	1.88367	0.954	0.469	0	Naive B cell
RPL18A	0	1.66136	0.934	0.45	0	Naive B cell
RPL26	0	1.51038	0.964	0.48	0	Naive B cell
RPS25	0	1.75774	0.966	0.482	0	Naive B cell
ZFAS1	0	1.64807	0.836	0.352	0	Naive B cell
RPL37	0	1.79542	0.968	0.485	0	Naive B cell
RPS19	0	1.11265	0.98	0.497	0	Naive B cell
RPS6	0	1.78395	0.994	0.512	0	Naive B cell
HLA-DMA	0	2.46512	0.596	0.115	0	Naive B cell
RPL13A	0	2.07153	0.982	0.501	0	Naive B cell
RPL7A	0	1.59212	0.957	0.476	0	Naive B cell
RPL5	0	1.63987	0.972	0.492	0	Naive B cell
RPS8	0	1.94191	0.989	0.51	0	Naive B cell
RPS4Y1	0	1.51914	0.744	0.267	0	Naive B cell
RPS9	0	1.50651	0.968	0.491	0	Naive B cell
RPS3A	0	1.77864	0.945	0.468	0	Naive B cell
MTRNR2L12	0	1.43018	0.846	0.37	0	Naive B cell
RPL28	0	1.33276	0.963	0.487	0	Naive B cell
RPS18	0	1.8493	0.976	0.5	0	Naive B cell
HSPE1	0	1.43345	0.819	0.343	0	Naive B cell
RPL21	0	2.12417	0.929	0.454	0	Naive B cell
RPLP0	0	1.17666	0.927	0.453	0	Naive B cell
RPL37A	0	1.70905	0.967	0.493	0	Naive B cell
CYBA	0	1.09616	0.873	0.4	0	Naive B cell
RPLP1	0	1.56544	0.988	0.516	0	Naive B cell
RPS2	0	1.74688	0.973	0.503	0	Naive B cell
RPL13	0	1.59327	0.991	0.525	0	Naive B cell
H3F3A	0	1.52901	0.917	0.452	0	Naive B cell
EZR	0	1.689	0.96	0.504	0	Naive B cell
RPL36AL	0	1.01037	0.864	0.409	0	Naive B cell
SPIB	0	5.03104	0.469	0.015	0	Naive B cell
MEF2C	0	1.7385	0.613	0.161	0	Naive B cell
HSPA8	0	0.569002	0.867	0.416	0	Naive B cell
RPL41	0	1.58979	0.956	0.508	0	Naive B cell
HERPUD1	0	1.41237	0.818	0.372	0	Naive B cell
LYN	0	2.05375	0.58	0.135	0	Naive B cell
HSPH1	0	1.2049	0.79	0.346	0	Naive B cell
RPS24	0	1.1408	0.964	0.52	0	Naive B cell
NOP53	0	1.15888	0.79	0.347	0	Naive B cell
RPL10	0	1.42864	0.968	0.526	0	Naive B cell
JUND	0	1.53276	0.941	0.502	0	Naive B cell
HSPD1	0	1.1848	0.827	0.389	0	Naive B cell
HSP90AA1	0	0.984269	0.956	0.519	0	Naive B cell
CMTM6	0	1.59975	0.65	0.214	0	Naive B cell
EEF1B2	0	1.75778	0.932	0.498	0	Naive B cell
GRASP	0	2.48772	0.543	0.109	0	Naive B cell
RPL36A	0	1.18709	0.803	0.369	0	Naive B cell
TOMM7	0	1.29926	0.892	0.463	0	Naive B cell
H3F3B	0	0.442118	0.945	0.517	0	Naive B cell
PRDM2	0	1.42624	0.73	0.304	0	Naive B cell
STK4	0	1.14839	0.789	0.364	0	Naive B cell
MARCKS	0	1.9537	0.597	0.177	0	Naive B cell
RPS26	0	1.18779	0.795	0.378	0	Naive B cell
NFKBID	0	2.79948	0.499	0.084	0	Naive B cell
MTRNR2L8	0	1.90162	0.665	0.251	0	Naive B cell
BCL11A	0	3.29006	0.469	0.056	0	Naive B cell
TNFRSF13B	0	4.51443	0.434	0.021	0	Naive B cell
YPEL5	0	1.25495	0.732	0.321	0	Naive B cell
BTG1	0	1.04846	0.972	0.561	0	Naive B cell
IGHM	0	1.37679	0.438	0.029	0	Naive B cell
ADAM28	0	2.08622	0.508	0.101	0	Naive B cell
PFDN5	0	0.929245	0.916	0.513	0	Naive B cell
MT-ND4L	0	0.517938	0.82	0.422	0	Naive B cell
CYTIP	0	1.06082	0.66	0.263	0	Naive B cell
OAZ1	0	0.884579	0.909	0.514	0	Naive B cell
2007-09-01	0	1.27313	0.666	0.274	0	Naive B cell
MKNK2	0	1.64406	0.596	0.207	0	Naive B cell
RPL22L1	0	1.95088	0.581	0.192	0	Naive B cell
NPM1	0	0.777638	0.906	0.518	0	Naive B cell
SNX2	0	1.67743	0.558	0.173	0	Naive B cell
ISG20	0	1.01307	0.666	0.281	0	Naive B cell
UBA52	0	1.04352	0.956	0.574	0	Naive B cell
BIRC3	0	0.92472	0.678	0.297	0	Naive B cell
SWAP70	0	1.43775	0.551	0.17	0	Naive B cell
HIST1H4C	0	1.22572	0.627	0.247	0	Naive B cell
RNASET2	0	1.40595	0.582	0.202	0	Naive B cell
BTF3	0	0.652725	0.869	0.49	0	Naive B cell
HLA-DQA2	0	2.69805	0.446	0.067	0	Naive B cell
NACA	0	1.05423	0.949	0.57	0	Naive B cell
YBX1	0	0.698072	0.864	0.485	0	Naive B cell
CORO1A	0	0.887997	0.598	0.22	0	Naive B cell
PNRC1	0	0.515054	0.874	0.498	0	Naive B cell
COMMD6	0	0.827943	0.729	0.354	0	Naive B cell
EEF1D	0	0.657655	0.894	0.519	0	Naive B cell
ARPC3	0	0.844803	0.756	0.383	0	Naive B cell
EEF2	0	0.746158	0.845	0.472	0	Naive B cell
TAGLN2	0	0.947766	0.766	0.396	0	Naive B cell
BLK	0	4.09269	0.39	0.021	0	Naive B cell
COX7C	0	0.547059	0.866	0.497	0	Naive B cell
FAU	0	1.2823	0.969	0.601	0	Naive B cell
H2AFZ	0	0.773568	0.699	0.332	0	Naive B cell
AC058791.1	0	1.4221	0.564	0.198	0	Naive B cell
HINT1	0	0.629927	0.781	0.417	0	Naive B cell
SLC25A6	0	0.744413	0.752	0.39	0	Naive B cell
TUBA1B	0	0.625802	0.74	0.38	0	Naive B cell
CD53	0	1.02522	0.594	0.235	0	Naive B cell
RACK1	0	0.881571	0.962	0.604	0	Naive B cell
CTSS	0	0.920637	0.553	0.196	0	Naive B cell
KDM6B	0	1.35644	0.586	0.23	0	Naive B cell
TUBA1A	0	0.693914	0.648	0.296	0	Naive B cell
FAM107B	0	1.04561	0.688	0.337	0	Naive B cell
RILPL2	0	1.31377	0.53	0.18	0	Naive B cell
RAN	0	0.698898	0.706	0.357	0	Naive B cell
HLA-DMB	0	2.8891	0.393	0.047	0	Naive B cell
SYNGR2	0	1.8043	0.468	0.122	0	Naive B cell
BCL2A1	0	1.70884	0.425	0.081	0	Naive B cell
DDX21	0	0.970894	0.705	0.361	0	Naive B cell
FAM49A	0	2.18203	0.422	0.078	0	Naive B cell
SET	0	0.728708	0.715	0.374	0	Naive B cell
ATP2B1	0	1.05981	0.618	0.278	0	Naive B cell
IDI1	0	1.27021	0.564	0.227	0	Naive B cell
CDC42	0	0.90686	0.701	0.365	0	Naive B cell
SERP1	0	0.774659	0.722	0.386	0	Naive B cell
PTGES3	0	0.907	0.758	0.424	0	Naive B cell
EMP3	0	1.34451	0.582	0.248	0	Naive B cell
MT-ND1	0	1.07175	0.968	0.634	0	Naive B cell
TSC22D3	0	0.663338	0.837	0.503	0	Naive B cell
MT-ND3	0	1.44421	0.959	0.626	0	Naive B cell
UQCRH	0	0.765316	0.704	0.371	0	Naive B cell
RALGPS2	0	1.1395	0.488	0.156	0	Naive B cell
ST13	0	0.940418	0.637	0.306	0	Naive B cell
DNAJB6	0	0.84276	0.715	0.384	0	Naive B cell
EEF1A1	0	1.55665	0.953	0.623	0	Naive B cell
SF1	0	0.786716	0.694	0.364	0	Naive B cell
SNHG8	0	1.18998	0.598	0.268	0	Naive B cell
HMGB1	0	0.759085	0.864	0.535	0	Naive B cell
GPBP1	0	0.701615	0.79	0.465	0	Naive B cell
ODC1	0	1.2187	0.517	0.192	0	Naive B cell
STK17A	0	0.960492	0.612	0.288	0	Naive B cell
SNU13	0	0.888005	0.635	0.312	0	Naive B cell
RAB11FIP1	0	0.796635	0.553	0.236	0	Naive B cell
CD40	0	2.97072	0.37	0.053	0	Naive B cell
MT-ND2	0	0.409017	0.967	0.65	0	Naive B cell
POU2F2	0	2.29403	0.409	0.092	0	Naive B cell
ARF6	0	1.01315	0.55	0.234	0	Naive B cell
SKIL	0	0.882627	0.608	0.293	0	Naive B cell
BCL2	0	1.14563	0.483	0.168	0	Naive B cell
ERP29	0	0.956535	0.579	0.265	0	Naive B cell
IER5	0	0.985334	0.542	0.229	0	Naive B cell
IDS	0	0.850936	0.604	0.292	0	Naive B cell
IFT57	0	1.74695	0.431	0.12	0	Naive B cell
HSPA4	0	1.58279	0.497	0.187	0	Naive B cell
CHCHD10	0	1.29723	0.48	0.17	0	Naive B cell
TCEA1	0	1.20529	0.568	0.258	0	Naive B cell
CD69	0	0.885266	0.536	0.227	0	Naive B cell
TAGAP	0	1.46333	0.424	0.116	0	Naive B cell
SERPINB9	0	1.31754	0.477	0.169	0	Naive B cell
KLF2	0	1.05167	0.555	0.248	0	Naive B cell
PRKCB	0	1.64265	0.411	0.104	0	Naive B cell
YWHAZ	0	0.710056	0.869	0.562	0	Naive B cell
TMEM243	0	1.71274	0.429	0.123	0	Naive B cell
UXT	0	0.974797	0.54	0.235	0	Naive B cell
EIF3F	0	0.817441	0.602	0.299	0	Naive B cell
LINC00926	0	4.25793	0.32	0.017	0	Naive B cell
MT-CYB	0	0.883648	0.979	0.678	0	Naive B cell
VPREB3	0	4.85392	0.311	0.011	0	Naive B cell
ORAI2	0	2.4839	0.372	0.073	0	Naive B cell
EIF1	0	0.678772	0.974	0.675	0	Naive B cell
ARHGAP24	0	0.629095	0.453	0.155	0	Naive B cell
CHORDC1	0	0.950491	0.554	0.256	0	Naive B cell
LIMD2	0	1.39448	0.44	0.142	0	Naive B cell
FCMR	0	2.58405	0.341	0.047	0	Naive B cell
MT-CO2	0	1.16861	0.982	0.69	0	Naive B cell
PTMA	0	0.97408	0.985	0.693	0	Naive B cell
SMDT1	0	1.18398	0.48	0.191	0	Naive B cell
PTPN1	0	0.893122	0.544	0.257	0	Naive B cell
EIF1B	0	0.971614	0.516	0.23	0	Naive B cell
GNG7	0	2.43126	0.336	0.05	0	Naive B cell
MT-ND4	0	0.709295	0.985	0.699	0	Naive B cell
UCP2	0	1.61668	0.401	0.115	0	Naive B cell
PARP14	0	0.971718	0.533	0.249	0	Naive B cell
GPSM3	0	1.45332	0.421	0.137	0	Naive B cell
LSM7	0	1.01933	0.501	0.219	0	Naive B cell
RHOH	0	1.16166	0.466	0.184	0	Naive B cell
KIAA1551	0	1.33267	0.44	0.16	0	Naive B cell
MT-CO3	0	1.15928	0.987	0.708	0	Naive B cell
MTPN	0	0.958089	0.517	0.238	0	Naive B cell
MT-ATP6	0	1.00551	0.985	0.708	0	Naive B cell
MOB1A	0	0.973481	0.494	0.219	0	Naive B cell
ST6GAL1	0	1.14982	0.4	0.125	0	Naive B cell
CHPT1	0	1.01381	0.429	0.158	0	Naive B cell
LINC01781	0	4.83614	0.279	0.008	0	Naive B cell
RBM38	0	1.64679	0.389	0.118	0	Naive B cell
SESN3	0	1.33012	0.407	0.136	0	Naive B cell
MT-CO1	0	0.922516	0.994	0.725	0	Naive B cell
EIF1AY	0	2.08045	0.351	0.082	0	Naive B cell
LY86	0	3.63402	0.29	0.022	0	Naive B cell
PMAIP1	0	0.71955	0.451	0.184	0	Naive B cell
EVI2B	0	0.932127	0.434	0.169	0	Naive B cell
AL121944.1	0	2.77489	0.315	0.051	0	Naive B cell
AC016831.5	0	1.25968	0.434	0.175	0	Naive B cell
C6orf48	0	1.44636	0.398	0.139	0	Naive B cell
FMNL1	0	1.18679	0.405	0.147	0	Naive B cell
RUBCNL	0	3.73116	0.277	0.019	0	Naive B cell
CTSZ	0	1.32638	0.393	0.136	0	Naive B cell
2001-03-01	0	2.09096	0.309	0.053	0	Naive B cell
SINHCAF	0	1.25854	0.395	0.142	0	Naive B cell
WDR74	0	1.76815	0.367	0.117	0	Naive B cell
KLHL6	0	2.22061	0.313	0.064	0	Naive B cell
CYBB	0	2.08433	0.291	0.043	0	Naive B cell
TPT1	0	0.736822	0.986	0.738	0	Naive B cell
TMEM156	0	2.44018	0.299	0.052	0	Naive B cell
WEE1	0	1.54002	0.359	0.118	0	Naive B cell
CTSH	0	1.12723	0.386	0.147	0	Naive B cell
PKIG	0	1.38474	0.338	0.105	0	Naive B cell
PIKFYVE	0	1.17548	0.361	0.133	0	Naive B cell
NFKB2	0	1.21616	0.349	0.123	0	Naive B cell
ANKRD13A	0	1.21018	0.326	0.102	0	Naive B cell
CD79B	0	3.1972	0.263	0.039	0	Naive B cell
DAPP1	0	1.76158	0.288	0.069	0	Naive B cell
RGS19	0	2.1399	0.269	0.054	0	Naive B cell
2009-09-01	0	1.532	0.329	0.114	0	Naive B cell
RCSD1	0	1.26923	0.308	0.093	0	Naive B cell
MALAT1	0	1.56451	1	0.785	0	Naive B cell
ORAI1	0	1.30938	0.325	0.112	0	Naive B cell
RASGRP2	0	2.15163	0.255	0.049	0	Naive B cell
RASSF2	0	1.5271	0.282	0.077	0	Naive B cell
AFF3	0	0.773956	0.289	0.085	0	Naive B cell
SP140	0	1.32852	0.282	0.082	0	Naive B cell
AC004687.1	0	1.75345	0.28	0.083	0	Naive B cell
MOB3A	0	1.42206	0.295	0.098	0	Naive B cell
MARCKSL1	1.97626258336499e-323	1.36186	0.35	0.132	7.2360854489909e-319	Naive B cell
DDX3Y	6.0892602718642e-319	0.796227	0.479	0.206	2.22958264854308e-314	Naive B cell
ADGRE5	1.23936466072406e-317	0.835659	0.5	0.225	4.53793370524114e-313	Naive B cell
SMIM14	5.6668608242148e-317	1.11179	0.406	0.166	2.07492109078625e-312	Naive B cell
TP53INP1	1.37261268321051e-316	1.42055	0.278	0.092	5.02582133957527e-312	Naive B cell
FKBP4	4.3826162771675e-313	1.09605	0.386	0.154	0	Naive B cell
RIPOR2	2.34206402561862e-311	0.974243	0.334	0.12	8.57547e-307	Naive B cell
UBALD2	0	1.11661	0.413	0.175	1.67021e-304	Naive B cell
SNX3	3.69852e-308	0.820144	0.531	0.255	1.35421e-303	Naive B cell
NR4A2	1.90714e-307	0.898547	0.559	0.277	6.98301e-303	Naive B cell
TRAF4	7.02072e-307	1.41802	0.256	0.081	2.57064e-302	Naive B cell
2006-09-01	1.08469e-305	1.21315	0.386	0.153	3.97158e-301	Naive B cell
NSA2	1.67411e-305	0.786768	0.569	0.28	6.12974e-301	Naive B cell
PDE4B	2.73938e-304	0.73583	0.551	0.257	1.00302e-299	Naive B cell
PHF20	5.74454e-303	0.80294	0.549	0.266	2.10336e-298	Naive B cell
TRIR	3.89663e-301	0.706912	0.632	0.325	1.42675e-296	Naive B cell
UBE2I	1.33242e-299	0.860423	0.484	0.224	4.87866e-295	Naive B cell
EIF3E	4.16127e-297	0.625213	0.698	0.386	1.52365e-292	Naive B cell
INPP5D	1.26356e-296	0.965864	0.314	0.112	4.62654e-292	Naive B cell
KYNU	1.97946e-289	1.1586	0.255	0.081	7.24779e-285	Naive B cell
PHF1	6.49837e-289	1.12483	0.299	0.107	2.37938e-284	Naive B cell
PPIA	1.50716e-286	0.544228	0.812	0.466	5.51847e-282	Naive B cell
TOMM20	9.85676e-286	0.627303	0.606	0.311	3.60905e-281	Naive B cell
SYPL1	2.13362e-285	0.998446	0.354	0.14	7.81223e-281	Naive B cell
CDC42SE2	8.05342e-284	0.676868	0.625	0.322	2.94876e-279	Naive B cell
ARL4A	7.80379e-283	0.941173	0.392	0.163	2.85736e-278	Naive B cell
COX4I1	9.77258e-282	0.468602	0.832	0.489	3.57823e-277	Naive B cell
KDM4B	4.37664e-279	1.01645	0.325	0.123	1.60251e-274	Naive B cell
CNPY3	2.69575e-275	1.39374	0.26	0.089	9.87048e-271	Naive B cell
TWISTNB	1.35141e-273	1.48782	0.294	0.109	4.94818e-269	Naive B cell
UBXN1	1.46919e-272	0.634168	0.56	0.277	5.37944e-268	Naive B cell
FYTTD1	1.58392e-272	0.979443	0.354	0.144	5.79951e-268	Naive B cell
ACAP1	1.67924e-272	0.615122	0.407	0.167	6.14853e-268	Naive B cell
PLEKHO1	5.25065e-269	1.0918	0.311	0.118	1.92253e-264	Naive B cell
CYCS	1.06026e-268	0.516232	0.629	0.33	3.88214e-264	Naive B cell
PHACTR1	1.46051e-267	1.36173	0.267	0.094	5.34764e-263	Naive B cell
ZBTB10	1.72952e-267	1.35668	0.255	0.088	6.33262e-263	Naive B cell
TRIM38	1.63837e-265	1.09625	0.363	0.152	5.99891e-261	Naive B cell
UQCRB	1.29049e-262	0.437999	0.792	0.47	4.72513e-258	Naive B cell
SELENOK	5.94724e-261	0.533856	0.658	0.356	2.17758e-256	Naive B cell
TMEM154	3.52119e-259	1.04403	0.254	0.086	1.28928e-254	Naive B cell
HLA-B	1.07578e-257	0.347335	0.986	0.67	3.93896e-253	Naive B cell
ANKRD44	2.50521e-255	0.646817	0.434	0.192	9.17283e-251	Naive B cell
HMGN1	3.74061e-253	0.630565	0.63	0.345	1.36963e-248	Naive B cell
FNBP1	6.23947e-253	0.515587	0.679	0.376	2.28458e-248	Naive B cell
ANKRD37	1.66238e-251	0.876242	0.336	0.136	6.0868e-247	Naive B cell
ST8SIA4	4.84052e-251	1.10985	0.252	0.088	1.77236e-246	Naive B cell
SAT1	2.67007e-250	0.457909	0.888	0.612	9.77647e-246	Naive B cell
ARRDC2	7.67604e-250	1.14251	0.264	0.095	2.81058e-245	Naive B cell
TUBA4A	3.33268e-249	0.363025	0.46	0.208	1.22026e-244	Naive B cell
GNAS	6.26672e-243	0.536825	0.838	0.536	2.29456e-238	Naive B cell
GRB2	3.13075e-242	0.641037	0.553	0.288	1.14632e-237	Naive B cell
SQSTM1	4.16864e-241	0.669229	0.715	0.428	1.52635e-236	Naive B cell
HNRNPK	1.0645e-238	0.529299	0.737	0.439	3.89768e-234	Naive B cell
MIR29B2CHG	1.90633e-238	0.952867	0.333	0.136	6.98001e-234	Naive B cell
CCDC107	1.36213e-237	1.02438	0.364	0.161	4.98742e-233	Naive B cell
EPB41L4A-AS1	1.08736e-236	1.28436	0.294	0.117	3.98138e-232	Naive B cell
COX17	1.19043e-235	0.732233	0.394	0.179	4.35875e-231	Naive B cell
UBE2N	2.08959e-234	0.756436	0.413	0.193	7.65103e-230	Naive B cell
NXT1	3.36401e-232	1.22317	0.257	0.095	1.23173e-227	Naive B cell
SMCHD1	1.9391e-231	0.621109	0.724	0.44	7.10002e-227	Naive B cell
RASGEF1B	3.50448e-230	0.810913	0.367	0.161	1.28316e-225	Naive B cell
SARAF	4.71178e-230	0.283888	0.765	0.436	1.72522e-225	Naive B cell
EIF3L	2.70097e-229	0.92251	0.432	0.21	9.8896e-225	Naive B cell
VASP	1.68064e-228	0.857737	0.388	0.177	6.15366e-224	Naive B cell
RFX1	2.64104e-228	1.19689	0.257	0.096	9.67018e-224	Naive B cell
LAMTOR5	4.8278e-228	0.679688	0.433	0.208	1.7677e-223	Naive B cell
AHSA1	1.00934e-227	0.671473	0.427	0.201	3.69571e-223	Naive B cell
RPS17	9.9168e-224	1.06874	0.43	0.21	3.63104e-219	Naive B cell
TGFB1	1.31158e-220	0.689908	0.455	0.222	4.80234e-216	Naive B cell
LINC00513	2.11335e-220	0.923498	0.352	0.154	7.73804e-216	Naive B cell
TMA7	5.41421e-220	0.415272	0.727	0.41	1.98241e-215	Naive B cell
UPF2	6.95738e-220	0.628747	0.44	0.215	2.54744e-215	Naive B cell
AC016831.7	7.43114e-220	0.716424	0.426	0.203	2.72091e-215	Naive B cell
RPL17	9.38182e-220	0.786545	0.496	0.257	3.43515e-215	Naive B cell
SRSF7	1.08746e-219	0.349795	0.778	0.468	3.98175e-215	Naive B cell
CCNI	3.56302e-219	0.509224	0.759	0.466	1.3046e-214	Naive B cell
RHOQ	5.86835e-219	0.824746	0.309	0.128	2.1487e-214	Naive B cell
GGA2	4.52254e-218	0.8975	0.304	0.125	1.65593e-213	Naive B cell
TUBB4B	6.79803e-216	0.39947	0.686	0.393	2.4891e-211	Naive B cell
NIN	9.06243e-216	0.695013	0.349	0.152	3.31821e-211	Naive B cell
ATP6V0D1	9.48245e-216	1.10064	0.324	0.142	3.472e-211	Naive B cell
RSL24D1	1.30966e-215	0.659528	0.501	0.259	4.79533e-211	Naive B cell
DDX27	1.16546e-213	0.668374	0.383	0.177	4.26732e-209	Naive B cell
RHOG	1.46836e-212	0.816463	0.364	0.164	5.37639e-208	Naive B cell
FAM102A	1.1533e-208	0.868509	0.288	0.116	4.22279e-204	Naive B cell
LCP1	1.40042e-207	0.423195	0.513	0.251	5.12765e-203	Naive B cell
SUMO2	3.86317e-206	0.469898	0.667	0.377	1.4145e-201	Naive B cell
SNRPG	4.02427e-206	0.590604	0.487	0.252	1.47349e-201	Naive B cell
B2M	7.28596e-206	0.307424	0.996	0.753	2.66775e-201	Naive B cell
EIF4B	8.63367e-206	0.534517	0.572	0.321	3.16122e-201	Naive B cell
CDC42SE1	4.15663e-204	0.686504	0.395	0.188	1.52195e-199	Naive B cell
CRIP1	1.58155e-201	0.53765	0.393	0.186	5.79086e-197	Naive B cell
HLA-E	1.88294e-201	0.28724	0.912	0.591	6.89437e-197	Naive B cell
GPX4	9.69976e-201	0.391881	0.582	0.315	3.55157e-196	Naive B cell
EIF3K	1.21029e-197	0.449876	0.655	0.379	4.43146e-193	Naive B cell
SNHG7	3.12041e-196	0.98101	0.332	0.151	1.14254e-191	Naive B cell
KLF6	4.94545e-196	0.522958	0.814	0.585	1.81078e-191	Naive B cell
SLBP	1.16974e-195	0.859703	0.338	0.155	4.283e-191	Naive B cell
HNRNPA1	2.02795e-195	0.395393	0.751	0.449	7.42535e-191	Naive B cell
NAP1L1	6.12162e-194	0.301144	0.77	0.488	2.24143e-189	Naive B cell
CHD4	5.97104e-193	0.804552	0.407	0.206	2.1863e-188	Naive B cell
DDX5	8.09081e-193	0.390469	0.948	0.737	2.96245e-188	Naive B cell
YWHAH	6.08643e-192	0.816315	0.371	0.18	2.22855e-187	Naive B cell
MAP1LC3B	1.41858e-190	0.471617	0.616	0.354	5.19414e-186	Naive B cell
UBE2B	2.66584e-188	0.459258	0.646	0.386	9.76098e-184	Naive B cell
RBM8A	9.86862e-188	0.390874	0.61	0.345	3.6134e-183	Naive B cell
C8orf59	4.57504e-187	1.10988	0.314	0.143	1.67515e-182	Naive B cell
FBL	1.66515e-185	0.618923	0.337	0.154	6.09696e-181	Naive B cell
CALM2	2.77401e-185	0.272012	0.817	0.527	1.01571e-180	Naive B cell
BOD1L1	6.79683e-184	0.459678	0.501	0.274	2.48866e-179	Naive B cell
DDX3X	9.71462e-182	0.445705	0.71	0.437	3.55701e-177	Naive B cell
NASP	3.46929e-179	0.364797	0.598	0.343	1.27028e-174	Naive B cell
CCDC50	2.14632e-176	0.590353	0.382	0.188	7.85873e-172	Naive B cell
ATP5MC2	1.98177e-175	0.311795	0.639	0.371	7.25624e-171	Naive B cell
AC245297.3	1.2822e-173	0.95874	0.319	0.15	4.69478e-169	Naive B cell
BCAS2	1.41959e-173	0.686658	0.4	0.206	5.19783e-169	Naive B cell
RAC2	8.88314e-173	0.350922	0.426	0.207	3.25256e-168	Naive B cell
PARP1	1.07342e-171	0.567448	0.326	0.152	3.93033e-167	Naive B cell
PIM3	1.54742e-171	0.650357	0.428	0.226	5.66588e-167	Naive B cell
UBE2A	1.15104e-169	0.531519	0.404	0.207	4.21455e-165	Naive B cell
PTP4A1	6.59953e-167	1.10175	0.261	0.113	2.41642e-162	Naive B cell
CREBRF	2.00899e-166	0.645546	0.471	0.264	7.35593e-162	Naive B cell
HSPA9	1.67495e-163	0.782248	0.423	0.229	6.13282e-159	Naive B cell
ATP5MG	3.57978e-163	0.327215	0.723	0.437	1.31074e-158	Naive B cell
CD47	1.56821e-162	0.529858	0.473	0.262	5.742e-158	Naive B cell
TXNIP	5.09274e-162	0.591866	0.698	0.476	1.86471e-157	Naive B cell
STIP1	1.34448e-161	0.465451	0.367	0.184	4.9228e-157	Naive B cell
PDE7A	1.68355e-161	0.50424	0.378	0.186	6.16432e-157	Naive B cell
TNIP2	1.93171e-161	0.790297	0.256	0.111	7.07294e-157	Naive B cell
CD44	3.16901e-161	0.288963	0.724	0.446	1.16033e-156	Naive B cell
MBP	2.30669e-158	0.45293	0.469	0.257	8.44594e-154	Naive B cell
HNRNPA0	2.97228e-157	0.441917	0.472	0.258	1.0883e-152	Naive B cell
GLIPR1	2.24696e-155	0.502162	0.371	0.186	8.22723e-151	Naive B cell
SNRPB	1.47374e-154	0.383207	0.499	0.278	5.39609e-150	Naive B cell
CYLD	4.17438e-154	0.442341	0.436	0.236	1.52845e-149	Naive B cell
NCOA3	2.07806e-153	0.434258	0.449	0.238	7.6088e-149	Naive B cell
ISCU	2.87835e-153	0.440977	0.394	0.206	1.05391e-148	Naive B cell
AMD1	1.24625e-152	0.481328	0.574	0.348	4.56315e-148	Naive B cell
TRMT112	2.03118e-152	0.396817	0.475	0.264	7.43718e-148	Naive B cell
RELB	1.17728e-150	0.734109	0.285	0.132	4.31061e-146	Naive B cell
PRMT1	1.35911e-150	0.767418	0.313	0.152	4.97636e-146	Naive B cell
CCT3	3.57814e-150	0.467319	0.446	0.246	1.31014e-145	Naive B cell
FAM133B	6.43039e-150	0.578028	0.521	0.311	2.35449e-145	Naive B cell
SLC25A3	2.33978e-149	0.293267	0.659	0.406	8.56709e-145	Naive B cell
PLP2	1.21646e-147	0.465434	0.381	0.198	4.45409e-143	Naive B cell
NGLY1	1.8864e-147	0.768031	0.301	0.146	6.90704e-143	Naive B cell
NR4A3	3.18494e-147	0.867023	0.284	0.134	1.16617e-142	Naive B cell
RNMT	3.24447e-146	0.554168	0.423	0.235	1.18796e-141	Naive B cell
EIF1AX	3.59432e-146	0.452959	0.494	0.285	1.31606e-141	Naive B cell
SELENOT	1.13439e-144	0.656715	0.364	0.192	4.15358e-140	Naive B cell
ICAM3	3.19191e-144	0.656754	0.306	0.147	1.16872e-139	Naive B cell
DENND4A	3.39352e-143	0.384976	0.453	0.248	1.24254e-138	Naive B cell
KMT2E	1.28845e-142	0.276969	0.768	0.516	4.71767e-138	Naive B cell
DOCK2	6.74919e-142	0.477588	0.275	0.127	2.47122e-137	Naive B cell
CCT8	3.82823e-141	0.560485	0.385	0.208	1.40171e-136	Naive B cell
DDX6	4.09182e-140	0.369669	0.491	0.282	1.49822e-135	Naive B cell
TAPBP	8.15065e-139	0.472702	0.447	0.254	2.98436e-134	Naive B cell
HNRNPF	6.27106e-138	0.380314	0.494	0.289	2.29615e-133	Naive B cell
MRPS6	9.72673e-138	0.581032	0.368	0.196	3.56144e-133	Naive B cell
TGIF1	5.2758e-137	0.809942	0.294	0.145	1.93173e-132	Naive B cell
HCG18	6.26516e-137	0.901778	0.301	0.151	2.29399e-132	Naive B cell
BACH1	3.21871e-136	0.550186	0.421	0.234	1.17853e-131	Naive B cell
MZT2B	7.81368e-136	0.371773	0.509	0.295	2.86098e-131	Naive B cell
SEL1L3	1.68796e-135	0.553508	0.287	0.135	6.18047e-131	Naive B cell
ABCF1	2.32908e-135	0.383922	0.377	0.202	8.52792e-131	Naive B cell
ATP6V1G1	3.20805e-135	0.288216	0.532	0.313	1.17463e-130	Naive B cell
ARPP19	8.70835e-135	0.546399	0.369	0.198	3.18856e-130	Naive B cell
CD82	1.21498e-134	0.537164	0.28	0.133	4.44865e-130	Naive B cell
TCP1	1.98565e-131	0.358133	0.447	0.254	7.27047e-127	Naive B cell
SYF2	2.45327e-131	0.29345	0.479	0.275	8.98266e-127	Naive B cell
DDT	2.56259e-131	0.666389	0.342	0.181	9.38292e-127	Naive B cell
TUT4	6.58259e-131	0.32079	0.455	0.257	2.41021e-126	Naive B cell
PPM1K	7.81725e-131	0.633306	0.299	0.15	2.86229e-126	Naive B cell
CKS2	7.97526e-131	0.586422	0.314	0.159	2.92014e-126	Naive B cell
WBP11	5.55084e-130	0.37439	0.345	0.181	2.03244e-125	Naive B cell
TRIM22	6.12496e-128	0.325605	0.346	0.179	2.24265e-123	Naive B cell
C19orf53	7.40378e-128	0.362321	0.457	0.261	2.71089e-123	Naive B cell
TAF7	3.23431e-127	0.331642	0.441	0.252	1.18424e-122	Naive B cell
CCT5	1.2817e-126	0.478309	0.358	0.193	4.69295e-122	Naive B cell
HNRNPAB	1.64026e-125	0.384045	0.474	0.278	6.00582e-121	Naive B cell
ATP1B3	6.52913e-125	0.535511	0.572	0.369	2.39064e-120	Naive B cell
LPXN	1.76916e-124	0.703336	0.262	0.127	6.47778e-120	Naive B cell
ELMSAN1	4.97334e-124	0.888848	0.252	0.122	1.82099e-119	Naive B cell
HCLS1	5.00554e-122	0.40448	0.343	0.179	1.83278e-117	Naive B cell
DNAJC8	9.39163e-122	0.324781	0.408	0.232	3.43875e-117	Naive B cell
SRSF9	4.49765e-120	0.463035	0.393	0.223	1.64681e-115	Naive B cell
AKIRIN1	1.92759e-119	0.458674	0.365	0.2	7.05789e-115	Naive B cell
EIF3G	8.63726e-119	0.377239	0.453	0.265	3.16253e-114	Naive B cell
SVIP	5.41969e-118	0.445365	0.293	0.149	1.98442e-113	Naive B cell
CNN2	1.46765e-117	0.692177	0.258	0.127	5.37381e-113	Naive B cell
MAP4K4	1.57422e-117	0.270755	0.46	0.261	5.76401e-113	Naive B cell
ALKBH7	4.12811e-117	0.672011	0.278	0.142	1.51151e-112	Naive B cell
HIGD2A	9.22304e-117	0.380202	0.381	0.212	3.37702e-112	Naive B cell
ATM	1.0317e-114	0.286206	0.383	0.214	3.77758e-110	Naive B cell
ISCA1	1.09964e-114	0.674324	0.271	0.136	4.02632e-110	Naive B cell
FXR1	2.70652e-114	0.302614	0.49	0.3	9.90993e-110	Naive B cell
STRBP	4.7526e-113	0.469953	0.257	0.125	1.74016e-108	Naive B cell
RAB21	8.51351e-113	0.43154	0.432	0.258	3.11722e-108	Naive B cell
ATP6V0E1	2.89492e-111	0.294935	0.553	0.346	1.05997e-106	Naive B cell
NFKB1	2.36161e-110	0.518182	0.466	0.284	8.64703e-106	Naive B cell
UFC1	3.216e-110	0.447058	0.378	0.217	1.17754e-105	Naive B cell
IFNGR2	2.00597e-107	0.496342	0.252	0.127	7.34488e-103	Naive B cell
NDUFB11	7.73262e-107	0.314813	0.442	0.261	2.8313e-102	Naive B cell
PFDN2	8.9946e-107	0.435476	0.319	0.174	3.29337e-102	Naive B cell
AHNAK	4.53904e-106	0.645846	0.623	0.455	1.66197e-101	Naive B cell
ELOVL5	1.75187e-105	0.314707	0.353	0.196	6.41448e-101	Naive B cell
JOSD1	3.23303e-104	0.424188	0.372	0.213	1.18378e-99	Naive B cell
BANF1	3.93706e-104	0.721664	0.26	0.136	1.44155e-99	Naive B cell
ZCCHC10	6.37984e-103	0.68572	0.251	0.13	2.33598e-98	Naive B cell
SS18L2	8.28246e-103	0.559496	0.254	0.129	3.03262e-98	Naive B cell
ZNF706	9.69283e-103	0.383641	0.403	0.241	3.54903e-98	Naive B cell
ARID5A	1.23955e-102	0.479029	0.315	0.172	4.53861e-98	Naive B cell
GABARAPL2	1.24861e-102	0.324657	0.381	0.221	4.57177e-98	Naive B cell
GNA13	2.84151e-102	0.562528	0.287	0.154	1.04042e-97	Naive B cell
MRPL18	8.18508e-102	0.487486	0.316	0.175	2.99697e-97	Naive B cell
ANAPC16	1.03483e-101	0.276948	0.513	0.327	3.78904e-97	Naive B cell
MT-ND6	2.51262e-101	0.386999	0.334	0.184	9.19995e-97	Naive B cell
MECP2	1.65984e-100	0.285853	0.392	0.229	6.0775e-96	Naive B cell
PRR13	1.89554e-100	0.471607	0.33	0.185	6.94052e-96	Naive B cell
CSNK1D	3.70417e-100	0.346149	0.381	0.224	1.35628e-95	Naive B cell
ALG13	4.58103e-100	0.537603	0.359	0.207	1.67734e-95	Naive B cell
EIF3D	7.21386e-100	0.296781	0.392	0.232	2.64136e-95	Naive B cell
STRAP	7.94307e-99	0.402202	0.336	0.191	2.90836e-94	Naive B cell
ZNF331	1.78732e-98	0.45375	0.413	0.252	6.54427e-94	Naive B cell
HMGN2	6.47271e-98	0.251942	0.454	0.278	2.36998e-93	Naive B cell
AES	6.65852e-98	0.541307	0.355	0.202	2.43802e-93	Naive B cell
EIF5A	3.39263e-97	0.377586	0.378	0.223	1.24221e-92	Naive B cell
BCL2L11	2.01434e-96	0.563137	0.266	0.143	7.37552e-92	Naive B cell
PNRC2	7.67253e-96	0.285194	0.378	0.222	2.8093e-91	Naive B cell
DDX18	3.83834e-94	0.290871	0.418	0.258	1.40541e-89	Naive B cell
SH3BP5	1.17747e-93	0.30369	0.295	0.16	4.3113e-89	Naive B cell
EIF2S3	4.96236e-92	0.399773	0.324	0.186	1.81697e-87	Naive B cell
PRNP	1.23977e-91	0.302563	0.315	0.178	4.53941e-87	Naive B cell
ZNF24	2.46858e-91	0.426699	0.258	0.138	9.03872e-87	Naive B cell
RBM23	6.14952e-91	0.463949	0.266	0.144	2.25165e-86	Naive B cell
OSER1	7.45631e-91	0.620838	0.267	0.146	2.73013e-86	Naive B cell
MIS18BP1	8.05919e-91	0.425721	0.333	0.194	2.95087e-86	Naive B cell
CAPZA1	3.9049e-90	0.260682	0.485	0.306	1.42978e-85	Naive B cell
ATP6V0B	2.19575e-89	0.304666	0.387	0.232	8.03973e-85	Naive B cell
USP12	1.9006e-87	0.390049	0.328	0.19	6.95903e-83	Naive B cell
CNTRL	1.95917e-87	0.260685	0.278	0.151	7.17351e-83	Naive B cell
PHB2	2.07217e-87	0.478621	0.283	0.159	7.58726e-83	Naive B cell
RNPS1	3.69668e-87	0.415302	0.339	0.202	1.35354e-82	Naive B cell
MIDN	1.45693e-86	0.301376	0.39	0.238	5.33455e-82	Naive B cell
SP110	1.73229e-84	0.356642	0.28	0.157	6.34278e-80	Naive B cell
DNAJA2	1.76883e-84	0.366438	0.306	0.176	6.47658e-80	Naive B cell
GNG2	4.1043e-84	0.305108	0.306	0.172	1.50279e-79	Naive B cell
GNL3	5.80697e-83	0.287551	0.33	0.196	2.12622e-78	Naive B cell
ARL6IP4	6.94264e-82	0.376913	0.393	0.244	2.54205e-77	Naive B cell
ATP6V1F	8.76188e-82	0.379998	0.331	0.195	3.20816e-77	Naive B cell
C16orf72	1.42636e-81	0.516096	0.262	0.146	5.22262e-77	Naive B cell
CHMP1B	5.73549e-81	0.519666	0.304	0.177	2.10005e-76	Naive B cell
TOB2	3.9659e-80	0.307659	0.281	0.161	1.45212e-75	Naive B cell
ANXA6	5.28061e-79	0.344034	0.27	0.152	1.9335e-74	Naive B cell
MBD4	1.86495e-78	0.536181	0.25	0.14	6.82853e-74	Naive B cell
FAM3C	2.20884e-77	0.60683	0.25	0.141	8.08766e-73	Naive B cell
MED10	2.56352e-75	0.319345	0.31	0.184	9.38634e-71	Naive B cell
ZNF267	1.38227e-74	0.367107	0.268	0.153	5.06119e-70	Naive B cell
ARHGDIA	6.72021e-72	0.297629	0.346	0.214	2.4606e-67	Naive B cell
TFRC	4.58883e-71	0.274705	0.283	0.164	1.6802e-66	Naive B cell
ATP5MPL	1.27115e-67	0.530533	0.337	0.212	4.65433e-63	Naive B cell
TMEM123	3.80926e-66	0.537409	0.36	0.237	1.39476e-61	Naive B cell
RPS19BP1	5.1468e-66	0.7802	0.25	0.149	1.8845e-61	Naive B cell
YPEL3	9.9114e-66	0.351427	0.272	0.162	3.62906e-61	Naive B cell
VPS37B	4.94775e-65	0.290359	0.347	0.221	1.81162e-60	Naive B cell
ARMCX3	1.32631e-64	0.380859	0.257	0.153	4.85628e-60	Naive B cell
STX7	1.509e-63	0.348163	0.265	0.157	5.52521e-59	Naive B cell
NUDT4	2.51943e-63	0.25412	0.297	0.181	9.2249e-59	Naive B cell
CCT7	8.29584e-63	0.367327	0.253	0.151	3.03752e-58	Naive B cell
TAF10	8.1806e-61	0.426226	0.265	0.161	2.99533e-56	Naive B cell
LMNA	1.56708e-60	0.339831	0.571	0.435	5.73788e-56	Naive B cell
USP36	3.19192e-59	0.256391	0.283	0.175	1.16872e-54	Naive B cell
HIPK2	6.63031e-58	0.26522	0.319	0.202	2.42769e-53	Naive B cell
JMY	9.40099e-56	0.294215	0.284	0.179	3.44217e-51	Naive B cell
GTF2B	1.24974e-53	0.268632	0.335	0.222	4.57591e-49	Naive B cell
ASAH1	3.45824e-49	0.26415	0.265	0.169	1.26623e-44	Naive B cell
ATP5MD	5.45069e-45	0.294415	0.361	0.246	1.99577e-40	Naive B cell
2002-09-01	3.2175e-43	0.507695	0.251	0.163	1.17809e-38	Naive B cell
EIF4H	1.99751e-41	0.256804	0.271	0.181	7.31388e-37	Naive B cell
H2AFV	3.89878e-36	0.28701	0.332	0.233	1.42754e-31	Naive B cell
GABPB1-AS1	7.57934e-22	0.316617	0.256	0.191	2.77518e-17	Naive B cell
MKI67	0	4.36544	0.658	0.037	0	Cycling B cell
MT-RNR2	0	2.65601	0.597	0.051	0	Cycling B cell
TOP2A	0	4.09988	0.532	0.038	0	Cycling B cell
PCLAF	0	4.47116	0.483	0.023	0	Cycling B cell
POU2AF1	0	4.31909	0.487	0.032	0	Cycling B cell
RRM2	0	4.42319	0.422	0.025	0	Cycling B cell
SHCBP1	0	5.01222	0.392	0.015	0	Cycling B cell
MTATP6P1	0	3.77827	0.384	0.022	0	Cycling B cell
TK1	0	4.13368	0.369	0.018	0	Cycling B cell
BIRC5	0	3.94615	0.342	0.015	0	Cycling B cell
MYBL2	0	4.75277	0.338	0.014	0	Cycling B cell
MTCO1P40	0	4.25267	0.335	0.014	0	Cycling B cell
AURKB	0	5.12397	0.304	0.012	0	Cycling B cell
RPS4XP22	0	4.35132	0.304	0.013	0	Cycling B cell
TCL1A	0	6.98629	0.289	0.004	0	Cycling B cell
HIST1H1B	0	5.5684	0.297	0.014	0	Cycling B cell
LRRC75A-AS1	0	4.56963	0.251	0.01	0	Cycling B cell
MZB1	1.27172497239537e-320	4.16625	0.586	0.054	4.65642098642564e-316	Cycling B cell
IGHG1	2.33369951633507e-311	2.82149	0.502	0.04	8.54484e-307	Cycling B cell
TYMS	0	3.93133	0.354	0.02	5.24098e-304	Cycling B cell
IGKC	3.14718e-308	2.52314	0.825	0.111	1.15234e-303	Cycling B cell
ASPM	1.2338e-286	3.5357	0.411	0.029	4.51757e-282	Cycling B cell
CD79A	1.9397e-277	3.50493	0.631	0.071	7.10221e-273	Cycling B cell
UBE2C	2.153e-269	4.58336	0.278	0.014	7.88319e-265	Cycling B cell
CDKN3	7.9652e-260	4.22849	0.304	0.018	2.91646e-255	Cycling B cell
CD79B	2.57975e-251	4.52615	0.471	0.044	9.44575e-247	Cycling B cell
CLSPN	6.16415e-242	4.27071	0.319	0.021	2.257e-237	Cycling B cell
TPX2	1.75651e-241	3.59905	0.395	0.032	6.43145e-237	Cycling B cell
FAM111B	8.95346e-240	4.81321	0.274	0.016	3.27831e-235	Cycling B cell
IGLC2	1.36252e-233	2.86106	0.449	0.042	4.98887e-229	Cycling B cell
MT-RNR1	1.37449e-233	2.45642	0.445	0.04	5.0327e-229	Cycling B cell
RPL3P4	4.30799e-233	3.73688	0.27	0.016	1.57737e-228	Cycling B cell
IGHA1	3.03536e-230	2.59985	0.646	0.089	1.1114e-225	Cycling B cell
IGHA2	4.99026e-223	1.54389	0.392	0.034	1.82718e-218	Cycling B cell
CENPM	6.49923e-222	3.96669	0.369	0.03	2.37969e-217	Cycling B cell
AL590867.2	2.33795e-213	3.5591	0.251	0.015	8.5604e-209	Cycling B cell
JCHAIN	2.19514e-206	2.08687	0.631	0.09	8.03751e-202	Cycling B cell
MAD2L1	3.63382e-204	3.67401	0.278	0.019	1.33052e-199	Cycling B cell
EAF2	8.47731e-202	3.91648	0.411	0.041	3.10397e-197	Cycling B cell
GTSE1	6.67684e-200	3.88902	0.255	0.016	2.44473e-195	Cycling B cell
HMMR	3.94106e-196	4.13243	0.255	0.017	1.44302e-191	Cycling B cell
CENPU	1.96689e-193	3.50303	0.357	0.032	7.20178e-189	Cycling B cell
IGHG3	7.38831e-192	2.09388	0.437	0.047	2.70523e-187	Cycling B cell
CENPF	1.24606e-189	3.01137	0.479	0.057	4.56246e-185	Cycling B cell
RPL13P12	2.87828e-187	3.10736	0.281	0.021	1.05388e-182	Cycling B cell
LRMP	4.2572e-182	4.48302	0.475	0.061	1.55878e-177	Cycling B cell
NUF2	6.67158e-182	3.96798	0.304	0.025	2.4428e-177	Cycling B cell
IGHM	1.10538e-173	2.33541	0.384	0.041	4.04736e-169	Cycling B cell
IGHG2	5.25964e-169	3.03016	0.312	0.028	1.92582e-164	Cycling B cell
CPNE5	6.73147e-169	3.23531	0.346	0.034	2.46473e-164	Cycling B cell
CCNB1	9.07821e-169	4.04501	0.278	0.022	3.32399e-164	Cycling B cell
IGLC3	1.25301e-168	2.06681	0.316	0.029	4.5879e-164	Cycling B cell
STMN1	2.04513e-167	3.31389	0.684	0.138	7.48823e-163	Cycling B cell
IGHG4	8.85007e-166	2.4178	0.361	0.037	3.24045e-161	Cycling B cell
HMGB2	7.4655e-157	3.29866	0.84	0.238	2.73349e-152	Cycling B cell
CDK1	1.37645e-156	3.54481	0.27	0.023	5.03987e-152	Cycling B cell
CENPW	3.31372e-156	2.96272	0.308	0.029	1.21332e-151	Cycling B cell
SNHG5	2.60518e-151	4.12901	0.452	0.066	9.53888e-147	Cycling B cell
CD38	2.67715e-148	2.92485	0.373	0.044	9.80238e-144	Cycling B cell
TACC3	7.75982e-148	3.07473	0.399	0.05	2.84126e-143	Cycling B cell
CD22	1.41564e-146	4.45151	0.251	0.021	5.18337e-142	Cycling B cell
SMC2	6.82194e-145	2.77443	0.422	0.056	2.49785e-140	Cycling B cell
MS4A1	2.06974e-142	3.83578	0.407	0.055	7.57834e-138	Cycling B cell
DERL3	2.28986e-137	3.09591	0.346	0.041	8.38432e-133	Cycling B cell
CENPE	1.40068e-135	3.25182	0.342	0.04	5.1286e-131	Cycling B cell
PARP1	7.29252e-133	2.8711	0.673	0.156	2.67015e-128	Cycling B cell
KIF11	9.42319e-132	3.44523	0.259	0.024	3.4503e-127	Cycling B cell
PTTG1	3.32073e-128	2.86793	0.521	0.094	1.21589e-123	Cycling B cell
HIST1H4C	4.17158e-128	4.32687	0.783	0.257	1.52742e-123	Cycling B cell
BIK	2.13149e-126	3.39615	0.262	0.026	7.80444e-122	Cycling B cell
PCNA	8.20342e-126	2.71731	0.456	0.074	3.00368e-121	Cycling B cell
SMC4	8.82835e-120	2.5082	0.719	0.191	3.2325e-115	Cycling B cell
NUSAP1	1.56544e-119	3.14447	0.399	0.06	5.73185e-115	Cycling B cell
HMGB3	1.93453e-114	2.76344	0.255	0.027	7.08329e-110	Cycling B cell
HELLS	4.50282e-112	3.00703	0.407	0.065	1.64871e-107	Cycling B cell
H2AFZ	7.86795e-105	2.35945	0.84	0.341	2.88085e-100	Cycling B cell
GMNN	1.00607e-100	2.49201	0.388	0.064	3.68373e-96	Cycling B cell
UBE2J1	3.3413e-98	2.58347	0.589	0.153	1.22342e-93	Cycling B cell
CKS1B	1.82462e-96	2.91001	0.35	0.056	6.68083e-92	Cycling B cell
NEIL1	1.14271e-95	3.89112	0.255	0.032	4.18404e-91	Cycling B cell
KLHL6	1.47138e-94	3.14652	0.392	0.07	5.38744e-90	Cycling B cell
LIG1	1.22515e-91	2.94289	0.278	0.038	4.48587e-87	Cycling B cell
DNMT1	2.05955e-90	2.56728	0.544	0.133	7.54104e-86	Cycling B cell
RGS13	2.1398e-87	3.55187	0.251	0.033	7.83489e-83	Cycling B cell
RAB30	1.16748e-86	2.34296	0.411	0.081	4.27473e-82	Cycling B cell
HIST1H1D	1.44206e-86	3.56794	0.395	0.078	5.28012e-82	Cycling B cell
TMPO	1.52546e-84	2.41146	0.605	0.17	5.58546e-80	Cycling B cell
MCM4	1.04395e-83	3.04623	0.251	0.034	3.82243e-79	Cycling B cell
HIST1H1E	1.18231e-83	3.394	0.418	0.089	4.32904e-79	Cycling B cell
CCDC167	1.9056e-83	2.36749	0.403	0.08	6.97734e-79	Cycling B cell
CD74	3.81112e-83	1.90101	0.875	0.393	1.39544e-78	Cycling B cell
TUBB	4.55372e-82	2.46282	0.65	0.218	1.66734e-77	Cycling B cell
NME1	1.01937e-80	2.06675	0.422	0.088	3.73241e-76	Cycling B cell
HIST1H1C	2.23794e-80	2.6052	0.494	0.124	8.19422e-76	Cycling B cell
HSH2D	4.84825e-80	2.53872	0.319	0.054	1.77519e-75	Cycling B cell
DTYMK	3.7709e-79	2.44018	0.308	0.05	1.38072e-74	Cycling B cell
SNHG6	5.00978e-78	2.93822	0.281	0.045	1.83433e-73	Cycling B cell
SNRNP25	2.50496e-77	2.82933	0.27	0.041	9.1719e-73	Cycling B cell
SEC11C	6.03422e-77	2.47156	0.544	0.158	2.20943e-72	Cycling B cell
CLPTM1L	2.43391e-76	2.1236	0.452	0.106	8.91175e-72	Cycling B cell
CCDC69	3.15459e-73	2.29502	0.433	0.101	1.15505e-68	Cycling B cell
H2AFV	1.28639e-71	2.66376	0.639	0.235	4.71011e-67	Cycling B cell
ANP32B	1.293e-71	2.14664	0.76	0.33	4.73433e-67	Cycling B cell
BASP1	2.8636e-71	2.12964	0.502	0.133	1.04851e-66	Cycling B cell
MCM7	2.94541e-71	2.19299	0.335	0.064	1.07846e-66	Cycling B cell
RPS20	1.28002e-70	1.90116	0.871	0.446	4.68679e-66	Cycling B cell
DUT	5.99021e-70	2.42411	0.548	0.169	2.19331e-65	Cycling B cell
MCM5	2.81325e-69	2.80564	0.262	0.043	1.03007e-64	Cycling B cell
ST6GAL1	3.68557e-68	1.72027	0.502	0.133	1.34947e-63	Cycling B cell
HMGN2	2.63117e-67	2.62242	0.677	0.283	9.63402e-63	Cycling B cell
DDX39A	4.74715e-67	2.1371	0.426	0.104	1.73817e-62	Cycling B cell
DCK	2.22578e-65	2.98778	0.255	0.043	8.14971e-61	Cycling B cell
RPL4	2.39498e-65	1.61889	0.856	0.435	8.76923e-61	Cycling B cell
HMGA1	5.70142e-64	1.66841	0.483	0.132	2.08757e-59	Cycling B cell
PHF19	9.64582e-64	2.13094	0.293	0.054	3.53182e-59	Cycling B cell
MEF2C	1.90394e-63	1.69843	0.57	0.174	6.97128e-59	Cycling B cell
TCF3	2.02422e-63	2.08266	0.323	0.065	7.41168e-59	Cycling B cell
RPS17	2.17508e-63	2.31323	0.612	0.216	7.96407e-59	Cycling B cell
VRK1	6.52598e-63	2.04531	0.327	0.066	2.38949e-58	Cycling B cell
SSRP1	7.2849e-61	1.8442	0.411	0.102	2.66737e-56	Cycling B cell
ISG20	3.16835e-60	1.71819	0.711	0.291	1.16009e-55	Cycling B cell
MCM3	2.80297e-59	2.50395	0.289	0.056	1.02631e-54	Cycling B cell
MYBL1	4.70129e-59	3.22385	0.251	0.045	1.72138e-54	Cycling B cell
SLAMF7	1.24346e-58	1.9037	0.278	0.053	4.55294e-54	Cycling B cell
RPL23	1.57693e-58	1.66468	0.84	0.449	5.77392e-54	Cycling B cell
POU2F2	2.36638e-58	2.41476	0.395	0.101	8.66452e-54	Cycling B cell
EZH2	3.00976e-58	1.9838	0.456	0.127	1.10203e-53	Cycling B cell
RASGRP3	1.01566e-56	2.06691	0.278	0.054	3.71883e-52	Cycling B cell
SYVN1	7.62713e-56	2.44643	0.251	0.047	2.79267e-51	Cycling B cell
BRI3BP	3.805e-55	2.45467	0.274	0.054	1.3932e-50	Cycling B cell
RPLP0	3.87547e-55	1.49004	0.817	0.467	1.419e-50	Cycling B cell
RPS16	7.13512e-55	1.3282	0.901	0.501	2.61253e-50	Cycling B cell
SNHG25	8.60137e-55	2.3814	0.407	0.111	3.14939e-50	Cycling B cell
CBX5	9.32677e-55	1.76999	0.422	0.115	3.415e-50	Cycling B cell
HMCES	1.37515e-54	2.23272	0.312	0.07	5.03512e-50	Cycling B cell
KIF22	3.59151e-54	2.52949	0.289	0.061	1.31503e-49	Cycling B cell
ANP32E	1.16925e-53	1.99645	0.548	0.19	4.28123e-49	Cycling B cell
CDK2AP2	1.70142e-53	1.57123	0.471	0.138	6.22975e-49	Cycling B cell
MATR3	2.31826e-53	1.50933	0.38	0.094	8.48833e-49	Cycling B cell
TUBA1B	3.31694e-53	1.97361	0.753	0.39	1.2145e-48	Cycling B cell
RPS6	4.80898e-53	1.23245	0.92	0.525	1.76081e-48	Cycling B cell
RPL31	5.08132e-53	1.57139	0.837	0.444	1.86053e-48	Cycling B cell
ATP5PF	6.58887e-53	1.6129	0.646	0.269	2.41251e-48	Cycling B cell
RPL13A	7.96401e-53	1.25818	0.924	0.515	2.91602e-48	Cycling B cell
HLA-DMB	1.69135e-52	2.77823	0.27	0.057	6.19287e-48	Cycling B cell
RPS11	6.64548e-52	1.25198	0.878	0.494	2.43324e-47	Cycling B cell
NUDT1	1.2925e-51	1.93435	0.289	0.061	4.73249e-47	Cycling B cell
CXXC5	4.53886e-51	2.05894	0.312	0.072	1.66191e-46	Cycling B cell
TMEM156	1.54931e-50	2.26561	0.278	0.059	5.67281e-46	Cycling B cell
GRB2	6.79211e-50	1.69532	0.684	0.295	2.48693e-45	Cycling B cell
SNRPC	7.44013e-50	1.51018	0.426	0.123	2.7242e-45	Cycling B cell
USP1	9.7003e-50	1.93487	0.43	0.126	3.55177e-45	Cycling B cell
DEF8	1.30185e-49	2.26835	0.266	0.056	4.76671e-45	Cycling B cell
ATAD2	1.88911e-49	1.98901	0.35	0.089	6.91699e-45	Cycling B cell
SDF2L1	2.15228e-49	2.5359	0.388	0.114	7.88057e-45	Cycling B cell
RPL27A	2.66437e-49	1.16526	0.897	0.495	9.75558e-45	Cycling B cell
SYK	1.2353e-48	2.29976	0.357	0.096	4.52306e-44	Cycling B cell
LBR	2.20042e-48	1.89595	0.46	0.146	8.05682e-44	Cycling B cell
SKA2	2.4468e-48	1.78356	0.327	0.079	8.95894e-44	Cycling B cell
CBX3	2.4662e-48	1.43885	0.673	0.299	9.03e-44	Cycling B cell
NUCKS1	2.80259e-48	1.5699	0.738	0.353	1.02617e-43	Cycling B cell
HMGB1	3.39699e-48	1.5977	0.837	0.544	1.24381e-43	Cycling B cell
FKBP11	1.81371e-47	2.5772	0.388	0.12	6.64089e-43	Cycling B cell
ATP5MPL	4.89277e-47	1.88034	0.563	0.215	1.79149e-42	Cycling B cell
LSM3	8.83503e-47	1.61738	0.452	0.148	3.23495e-42	Cycling B cell
LSM5	1.77814e-46	1.86127	0.403	0.119	6.51066e-42	Cycling B cell
TPD52	1.89725e-46	1.60855	0.487	0.161	6.94679e-42	Cycling B cell
CKAP2	4.13196e-45	2.01309	0.297	0.071	1.51292e-40	Cycling B cell
PDIA4	1.01422e-44	1.65458	0.369	0.105	3.71358e-40	Cycling B cell
NDUFB3	1.17038e-44	1.71728	0.399	0.118	4.28534e-40	Cycling B cell
CALM3	1.90963e-44	1.51665	0.513	0.185	6.9921e-40	Cycling B cell
SMC1A	3.92022e-44	1.60965	0.407	0.123	1.43539e-39	Cycling B cell
ATP5MC3	4.73364e-44	1.48137	0.616	0.271	1.73322e-39	Cycling B cell
CORO1A	5.21891e-44	1.68755	0.57	0.23	1.91091e-39	Cycling B cell
RAD21	8.82043e-44	1.72923	0.65	0.286	3.2296e-39	Cycling B cell
IRF8	2.91037e-43	2.66349	0.274	0.067	1.06563e-38	Cycling B cell
DNAJC9	3.13568e-43	1.84357	0.376	0.11	1.14813e-38	Cycling B cell
RPLP2	6.43247e-43	1.00114	0.909	0.515	2.35525e-38	Cycling B cell
RANBP1	1.68099e-42	1.82576	0.441	0.15	6.15496e-38	Cycling B cell
HLA-DRA	1.21972e-41	1.0913	0.597	0.242	4.46602e-37	Cycling B cell
ATP5IF1	1.62302e-41	1.29727	0.62	0.271	5.94269e-37	Cycling B cell
HNRNPA2B1	2.51179e-41	1.32341	0.909	0.655	9.19692e-37	Cycling B cell
RPS27L	2.83852e-41	1.61027	0.578	0.245	1.03933e-36	Cycling B cell
PIM2	3.1924e-41	1.46238	0.342	0.095	1.1689e-36	Cycling B cell
HSP90B1	3.31774e-41	2.63199	0.631	0.355	1.21479e-36	Cycling B cell
HERPUD1	3.73009e-41	1.35928	0.726	0.385	1.36577e-36	Cycling B cell
PRDX3	3.75902e-41	1.85263	0.319	0.086	1.37637e-36	Cycling B cell
MBD4	4.16125e-41	1.8003	0.426	0.142	1.52364e-36	Cycling B cell
RPS5	5.77254e-41	1.11752	0.833	0.459	2.11362e-36	Cycling B cell
HMGN1	1.17847e-40	1.70212	0.684	0.353	4.31495e-36	Cycling B cell
SERF2	1.45657e-40	1.16263	0.867	0.577	5.33323e-36	Cycling B cell
RPS8	4.40924e-40	0.856164	0.939	0.524	1.61444e-35	Cycling B cell
2006-09-01	1.65808e-39	1.89744	0.456	0.159	6.07104e-35	Cycling B cell
NANS	2.26736e-39	1.7899	0.407	0.136	8.30193e-35	Cycling B cell
HNRNPD	2.29952e-39	1.69845	0.696	0.359	8.41969e-35	Cycling B cell
RPA3	2.79984e-39	1.87637	0.38	0.12	1.02516e-34	Cycling B cell
CTSH	2.89844e-39	1.58702	0.437	0.154	1.06127e-34	Cycling B cell
RPL22L1	3.68191e-39	1.83628	0.506	0.203	1.34813e-34	Cycling B cell
SLC25A5	4.69373e-39	1.60926	0.616	0.299	1.71861e-34	Cycling B cell
MYDGF	4.73799e-39	2.14169	0.433	0.162	1.73482e-34	Cycling B cell
HNRNPM	6.09101e-39	1.39296	0.719	0.383	2.23022e-34	Cycling B cell
CKS2	7.14609e-39	1.52263	0.46	0.163	2.61654e-34	Cycling B cell
BCL2L11	1.84553e-38	1.52472	0.426	0.146	6.75743e-34	Cycling B cell
SNRPD2	2.76566e-38	1.39945	0.669	0.328	1.01265e-33	Cycling B cell
KIF20B	4.46833e-38	1.74259	0.3	0.081	1.63608e-33	Cycling B cell
LCP1	6.58954e-38	1.5866	0.578	0.258	2.41276e-33	Cycling B cell
RPL27	9.87375e-38	1.16416	0.81	0.456	3.61527e-33	Cycling B cell
HLA-DQA1	1.003e-37	1.38526	0.403	0.133	3.67249e-33	Cycling B cell
HLA-DMA	1.89978e-37	2.04615	0.388	0.129	6.95606e-33	Cycling B cell
HIST2H2AC	2.84304e-37	2.95256	0.259	0.066	1.04098e-32	Cycling B cell
SEL1L3	5.1904e-37	1.80251	0.407	0.139	1.90047e-32	Cycling B cell
H2AFX	5.26304e-37	1.81776	0.365	0.113	1.92706e-32	Cycling B cell
TP53INP1	9.62722e-37	2.02117	0.327	0.097	3.52501e-32	Cycling B cell
FAM76B	9.74766e-37	2.33121	0.331	0.102	3.56911e-32	Cycling B cell
SPCS3	9.92843e-37	1.58614	0.513	0.221	3.63529e-32	Cycling B cell
CNTRL	1.01448e-36	1.69996	0.43	0.154	3.71451e-32	Cycling B cell
ANAPC11	1.68168e-36	1.23419	0.452	0.165	6.15748e-32	Cycling B cell
PSMA4	2.68638e-36	1.60236	0.51	0.203	9.83619e-32	Cycling B cell
MRPL51	2.70857e-36	1.50708	0.445	0.162	9.91744e-32	Cycling B cell
ATP5MG	8.22232e-36	1.19391	0.749	0.445	3.0106e-31	Cycling B cell
RGS1	1.00886e-35	0.639068	0.658	0.289	3.69395e-31	Cycling B cell
MRPL52	1.15249e-35	1.36791	0.441	0.163	4.21986e-31	Cycling B cell
RPS19	1.61472e-35	0.750894	0.947	0.51	5.91231e-31	Cycling B cell
RAN	2.09487e-35	1.32881	0.681	0.367	7.67038e-31	Cycling B cell
NUDT21	3.85219e-35	1.79549	0.319	0.095	1.41048e-30	Cycling B cell
SPATS2	9.58184e-35	1.61574	0.388	0.132	3.50839e-30	Cycling B cell
SELENOH	1.03574e-34	1.29874	0.494	0.194	3.79237e-30	Cycling B cell
RPL35	1.50987e-34	0.991474	0.859	0.481	5.52839e-30	Cycling B cell
SNRPD1	4.05998e-34	1.61658	0.464	0.182	1.48656e-29	Cycling B cell
HSPB11	9.57818e-34	1.91172	0.327	0.101	3.50705e-29	Cycling B cell
BLNK	1.06271e-33	1.45924	0.259	0.067	3.8911e-29	Cycling B cell
UQCRQ	1.30278e-33	1.15345	0.586	0.273	4.77012e-29	Cycling B cell
GAPDH	2.22432e-33	1.02994	0.848	0.57	8.14435e-29	Cycling B cell
EBAG9	3.04772e-33	1.47248	0.312	0.093	1.11592e-28	Cycling B cell
HSPD1	3.49183e-33	1.05218	0.745	0.401	1.27854e-28	Cycling B cell
TFDP1	3.6301e-33	1.56669	0.312	0.093	1.32916e-28	Cycling B cell
NDUFB6	4.54106e-33	1.28014	0.403	0.142	1.66271e-28	Cycling B cell
MDH1	9.62068e-33	1.62718	0.418	0.154	3.52261e-28	Cycling B cell
CSKMT	1.1154e-32	2.05037	0.281	0.082	4.08402e-28	Cycling B cell
XBP1	1.16498e-32	1.95026	0.494	0.223	4.26556e-28	Cycling B cell
OAZ1	2.07069e-32	1.05288	0.814	0.525	7.58185e-28	Cycling B cell
PTMA	2.44737e-32	0.832171	0.962	0.701	8.96104e-28	Cycling B cell
SMARCB1	4.08125e-32	1.48676	0.308	0.093	1.49435e-27	Cycling B cell
NDUFA1	4.38933e-32	0.998178	0.635	0.314	1.60715e-27	Cycling B cell
PPP1CA	5.29422e-32	1.34378	0.437	0.166	1.93848e-27	Cycling B cell
RPL8	7.47905e-32	0.847498	0.863	0.494	2.73845e-27	Cycling B cell
ARPC5	1.16226e-31	1.54952	0.593	0.29	4.25563e-27	Cycling B cell
SNRPD3	1.16759e-31	1.45969	0.487	0.202	4.27513e-27	Cycling B cell
AKR1B1	1.5459e-31	1.45013	0.274	0.077	5.6603e-27	Cycling B cell
NOL7	2.73051e-31	1.08987	0.51	0.213	9.99775e-27	Cycling B cell
PFN1	6.77012e-31	1.2738	0.734	0.441	2.47888e-26	Cycling B cell
RPL37A	9.85125e-31	0.855708	0.867	0.506	3.60703e-26	Cycling B cell
RBBP7	1.06903e-30	1.58919	0.411	0.156	3.91426e-26	Cycling B cell
PSIP1	1.0723e-30	1.56473	0.445	0.184	3.92622e-26	Cycling B cell
COX6A1	1.19968e-30	1.06781	0.627	0.325	4.39261e-26	Cycling B cell
COX8A	1.29072e-30	1.18106	0.616	0.316	4.72597e-26	Cycling B cell
MIS18BP1	2.01029e-30	1.45488	0.471	0.197	7.36066e-26	Cycling B cell
CD27	2.13278e-30	1.44977	0.308	0.096	7.80917e-26	Cycling B cell
ROMO1	2.33594e-30	0.995164	0.529	0.229	8.55303e-26	Cycling B cell
IDH2	2.55584e-30	1.468	0.335	0.11	9.3582e-26	Cycling B cell
STRBP	3.4409e-30	1.58113	0.365	0.129	1.25988e-25	Cycling B cell
PSME2	5.71462e-30	1.54084	0.517	0.25	2.09241e-25	Cycling B cell
ANP32A	6.5658e-30	1.27741	0.456	0.186	2.40407e-25	Cycling B cell
PSMB4	6.95041e-30	1.14606	0.456	0.181	2.54489e-25	Cycling B cell
TIFA	7.09738e-30	1.19032	0.281	0.083	2.5987e-25	Cycling B cell
JPT1	7.80825e-30	1.2123	0.532	0.239	2.85899e-25	Cycling B cell
NDUFA4	7.96002e-30	0.906105	0.684	0.377	2.91456e-25	Cycling B cell
C12orf75	9.48025e-30	1.19412	0.361	0.124	3.47119e-25	Cycling B cell
OSTC	1.05786e-29	1.19912	0.452	0.184	3.87337e-25	Cycling B cell
PSMC3	1.06909e-29	1.22364	0.365	0.128	3.91446e-25	Cycling B cell
PDIA6	2.06136e-29	1.37323	0.513	0.24	7.54768e-25	Cycling B cell
RFC1	2.599e-29	1.2664	0.445	0.177	9.51624e-25	Cycling B cell
COX6C	3.67184e-29	0.866632	0.696	0.394	1.34444e-24	Cycling B cell
ATP5MC1	5.27691e-29	1.37721	0.399	0.155	1.93214e-24	Cycling B cell
FKBP2	6.46275e-29	1.71343	0.422	0.179	2.36634e-24	Cycling B cell
GTF3A	7.87399e-29	0.919826	0.506	0.215	2.88306e-24	Cycling B cell
TPRKB	8.20517e-29	1.3388	0.262	0.076	3.00432e-24	Cycling B cell
IMP4	9.08778e-29	1.32674	0.274	0.082	3.32749e-24	Cycling B cell
GSTP1	1.27563e-28	0.613036	0.635	0.334	4.6707e-24	Cycling B cell
TERF2	1.42158e-28	2.08984	0.259	0.077	5.20513e-24	Cycling B cell
ILF3	1.68034e-28	1.07203	0.544	0.251	6.15258e-24	Cycling B cell
HSPA5	1.83829e-28	1.37292	0.612	0.326	6.73091e-24	Cycling B cell
MIF	2.18173e-28	0.872707	0.494	0.211	7.98839e-24	Cycling B cell
H2AFY	3.86506e-28	1.79922	0.483	0.213	1.41519e-23	Cycling B cell
MANF	3.97338e-28	1.75114	0.373	0.143	1.45485e-23	Cycling B cell
HLA-DPA1	4.95389e-28	1.11759	0.521	0.239	1.81387e-23	Cycling B cell
RCSD1	5.07734e-28	1.87976	0.297	0.099	1.85907e-23	Cycling B cell
NDUFA2	6.34214e-28	1.3218	0.452	0.191	2.32217e-23	Cycling B cell
RPS2	6.44176e-28	0.747892	0.905	0.516	2.35865e-23	Cycling B cell
RRM1	6.61173e-28	1.65784	0.251	0.073	2.42089e-23	Cycling B cell
HLA-DRB1	7.97114e-28	0.830126	0.582	0.271	2.91863e-23	Cycling B cell
ATP2A3	8.60434e-28	1.46209	0.278	0.086	3.15048e-23	Cycling B cell
GLRX	1.0437e-27	1.4049	0.373	0.14	3.82152e-23	Cycling B cell
COX5A	1.05422e-27	1.28635	0.49	0.224	3.86004e-23	Cycling B cell
ATP5MF	1.35176e-27	1.28259	0.487	0.221	4.94946e-23	Cycling B cell
COPE	1.37432e-27	1.43186	0.502	0.24	5.03208e-23	Cycling B cell
SNRPE	1.93169e-27	1.16213	0.418	0.168	7.07287e-23	Cycling B cell
SEC14L1	2.40677e-27	1.30695	0.498	0.222	8.81238e-23	Cycling B cell
EZR	5.02807e-27	1.04219	0.817	0.517	1.84103e-22	Cycling B cell
CHCHD7	8.39372e-27	1.29712	0.316	0.107	3.07336e-22	Cycling B cell
SMC3	8.48695e-27	1.37116	0.456	0.196	3.1075e-22	Cycling B cell
RASSF6	8.91227e-27	2.10816	0.251	0.077	3.26323e-22	Cycling B cell
MRPL27	9.61291e-27	1.24312	0.274	0.085	3.51977e-22	Cycling B cell
SMAP2	1.17824e-26	0.958923	0.669	0.356	4.31412e-22	Cycling B cell
ATP5F1A	1.342e-26	0.959162	0.494	0.225	4.91372e-22	Cycling B cell
RHOH	1.88293e-26	1.40697	0.452	0.192	6.89436e-22	Cycling B cell
PRDX4	1.91186e-26	1.71678	0.323	0.118	7.00027e-22	Cycling B cell
PPM1G	3.55284e-26	1.17567	0.456	0.201	1.30087e-21	Cycling B cell
TXNDC11	4.10983e-26	1.33635	0.312	0.107	1.50481e-21	Cycling B cell
COX17	5.82455e-26	1.1291	0.441	0.185	2.13266e-21	Cycling B cell
SIVA1	7.02649e-26	1.28417	0.426	0.181	2.57275e-21	Cycling B cell
PDAP1	7.91573e-26	1.18931	0.418	0.172	2.89835e-21	Cycling B cell
MRPS18B	8.44063e-26	1.50941	0.262	0.082	3.09054e-21	Cycling B cell
LDHB	1.11422e-25	1.12832	0.567	0.281	4.07973e-21	Cycling B cell
ARPC2	1.13676e-25	1.34306	0.757	0.541	4.16226e-21	Cycling B cell
MINOS1	2.09345e-25	1.88208	0.354	0.135	7.66516e-21	Cycling B cell
LSM6	2.29582e-25	1.51737	0.285	0.095	8.40616e-21	Cycling B cell
ATF4	2.36425e-25	0.913329	0.635	0.335	8.65669e-21	Cycling B cell
HSP90AA1	3.88079e-25	0.33038	0.905	0.532	1.42095e-20	Cycling B cell
RBX1	4.78645e-25	1.10158	0.506	0.239	1.75256e-20	Cycling B cell
METAP2	5.16357e-25	1.41215	0.521	0.257	1.89064e-20	Cycling B cell
TENT5C	7.77495e-25	1.19764	0.395	0.163	2.8468e-20	Cycling B cell
ATP5PO	9.13256e-25	1.23252	0.494	0.233	3.34389e-20	Cycling B cell
TIMM10	1.17834e-24	1.5414	0.259	0.082	4.3145e-20	Cycling B cell
RPS24	1.34343e-24	0.682577	0.901	0.533	4.91898e-20	Cycling B cell
RPS13	1.3813e-24	0.642469	0.867	0.483	5.05765e-20	Cycling B cell
RNASEH2C	1.63237e-24	1.44842	0.342	0.129	5.9769e-20	Cycling B cell
DBI	1.88096e-24	1.23588	0.551	0.29	6.88715e-20	Cycling B cell
YWHAB	1.99998e-24	0.803538	0.749	0.477	7.32294e-20	Cycling B cell
CRELD2	2.55301e-24	1.42049	0.285	0.099	9.34783e-20	Cycling B cell
RBM17	2.70284e-24	1.08066	0.502	0.238	9.89646e-20	Cycling B cell
SEC61G	2.7655e-24	1.18666	0.475	0.227	1.01259e-19	Cycling B cell
CISD2	2.99816e-24	1.30227	0.3	0.105	1.09777e-19	Cycling B cell
RPL19	3.16195e-24	0.616387	0.882	0.499	1.15775e-19	Cycling B cell
PPIB	3.18075e-24	1.77864	0.563	0.347	1.16463e-19	Cycling B cell
EIF1AY	4.8843e-24	1.46435	0.27	0.09	1.78839e-19	Cycling B cell
YBX1	6.42759e-24	0.976748	0.745	0.496	2.35346e-19	Cycling B cell
UQCC2	9.38312e-24	1.10624	0.262	0.085	3.43563e-19	Cycling B cell
PSMB3	9.97739e-24	1.162	0.452	0.207	3.65322e-19	Cycling B cell
MT-ATP8	1.27017e-23	0.509991	0.65	0.358	4.65073e-19	Cycling B cell
TCEA1	1.43567e-23	1.42656	0.521	0.267	5.25669e-19	Cycling B cell
PSMD14	1.62345e-23	1.05138	0.437	0.188	5.94425e-19	Cycling B cell
RBBP4	1.78435e-23	1.28557	0.433	0.191	6.53341e-19	Cycling B cell
SEC61B	2.1523e-23	1.38454	0.551	0.322	7.88063e-19	Cycling B cell
ANKRD13A	2.91475e-23	1.48368	0.297	0.108	1.06723e-18	Cycling B cell
NDUFS6	3.21598e-23	1.14662	0.456	0.216	1.17753e-18	Cycling B cell
UBALD2	4.72547e-23	1.20822	0.418	0.182	1.73023e-18	Cycling B cell
NDUFA13	5.61153e-23	0.844671	0.544	0.271	2.05466e-18	Cycling B cell
SF3B2	6.45039e-23	0.863726	0.506	0.246	2.36181e-18	Cycling B cell
SEC13	7.47575e-23	1.16943	0.319	0.12	2.73725e-18	Cycling B cell
NDUFB1	7.86309e-23	1.12721	0.506	0.247	2.87907e-18	Cycling B cell
SNRPB	8.31112e-23	1.17072	0.536	0.284	3.04312e-18	Cycling B cell
TMEM258	9.47294e-23	1.19014	0.525	0.286	3.46852e-18	Cycling B cell
LRRC59	9.98237e-23	1.40071	0.285	0.102	3.65504e-18	Cycling B cell
DNAJB11	1.14739e-22	1.2707	0.335	0.13	4.20119e-18	Cycling B cell
TRAPPC1	1.23939e-22	1.32476	0.357	0.141	4.53801e-18	Cycling B cell
GUSB	1.2427e-22	1.15119	0.285	0.1	4.55014e-18	Cycling B cell
CCT8	1.279e-22	1.06817	0.46	0.212	4.68307e-18	Cycling B cell
TMEM160	1.46569e-22	1.15407	0.331	0.125	5.36661e-18	Cycling B cell
STOML2	1.53797e-22	1.08289	0.285	0.1	5.63127e-18	Cycling B cell
TIMM8B	2.14922e-22	0.966434	0.327	0.123	7.86936e-18	Cycling B cell
RGS2	2.16061e-22	0.815679	0.529	0.268	7.91107e-18	Cycling B cell
NHP2	2.28842e-22	0.851795	0.342	0.131	8.37905e-18	Cycling B cell
MT-ND5	2.55799e-22	0.575852	0.89	0.624	9.36609e-18	Cycling B cell
2007-09-01	3.05354e-22	1.15675	0.555	0.285	1.11805e-17	Cycling B cell
CLIC4	4.96705e-22	0.782281	0.437	0.189	1.81869e-17	Cycling B cell
ATP5MD	6.25568e-22	1.34545	0.487	0.249	2.29052e-17	Cycling B cell
GTF2F1	6.28444e-22	0.897652	0.327	0.125	2.30105e-17	Cycling B cell
APOBEC3C	7.21218e-22	1.13198	0.266	0.091	2.64074e-17	Cycling B cell
EIF2S2	1.00467e-21	1.01356	0.551	0.295	3.6786e-17	Cycling B cell
SSR3	1.07026e-21	1.35216	0.46	0.236	3.91877e-17	Cycling B cell
HNRNPAB	1.07512e-21	1.29534	0.536	0.283	3.93655e-17	Cycling B cell
CEP128	1.42172e-21	1.10124	0.262	0.09	5.20562e-17	Cycling B cell
RPLP1	1.65008e-21	0.358422	0.947	0.529	6.04176e-17	Cycling B cell
NOP56	2.39163e-21	0.837705	0.525	0.26	8.75697e-17	Cycling B cell
NOLC1	2.46923e-21	1.12505	0.346	0.14	9.04107e-17	Cycling B cell
AURKAIP1	2.57728e-21	1.26857	0.399	0.182	9.43672e-17	Cycling B cell
NAA38	2.66685e-21	0.985494	0.399	0.174	9.76467e-17	Cycling B cell
NDUFB7	2.72743e-21	1.14971	0.403	0.183	9.98648e-17	Cycling B cell
EDEM1	3.00385e-21	1.43109	0.251	0.086	1.09986e-16	Cycling B cell
UBE2A	3.24873e-21	1.01067	0.456	0.213	1.18952e-16	Cycling B cell
MT-ND6	3.61137e-21	1.28784	0.418	0.188	1.3223e-16	Cycling B cell
UQCRH	4.07504e-21	1.19617	0.593	0.38	1.49208e-16	Cycling B cell
EIF3A	4.4497e-21	0.828671	0.673	0.407	1.62926e-16	Cycling B cell
SWAP70	4.81968e-21	1.55679	0.392	0.181	1.76472e-16	Cycling B cell
PKM	6.53745e-21	0.924319	0.559	0.297	2.39369e-16	Cycling B cell
SERBP1	7.35106e-21	0.755198	0.719	0.459	2.69159e-16	Cycling B cell
FDPS	8.45287e-21	1.24244	0.354	0.147	3.09502e-16	Cycling B cell
HSPE1	8.51908e-21	0.798487	0.646	0.357	3.11926e-16	Cycling B cell
NSD2	8.8549e-21	1.57061	0.281	0.105	3.24222e-16	Cycling B cell
SLBP	9.17832e-21	1.36279	0.365	0.16	3.36064e-16	Cycling B cell
ZCRB1	9.39435e-21	0.909501	0.323	0.126	3.43974e-16	Cycling B cell
IKZF3	9.6289e-21	0.843494	0.346	0.139	3.52562e-16	Cycling B cell
SRP72	1.21244e-20	0.830024	0.433	0.197	4.43933e-16	Cycling B cell
FKBP3	1.42964e-20	0.903526	0.327	0.128	5.23464e-16	Cycling B cell
CSNK2B	1.45135e-20	0.937425	0.388	0.168	5.31411e-16	Cycling B cell
TKT	1.51278e-20	0.996753	0.411	0.184	5.53906e-16	Cycling B cell
HCLS1	1.64005e-20	1.04263	0.418	0.183	6.00505e-16	Cycling B cell
PSMA7	1.73227e-20	1.04236	0.662	0.424	6.34271e-16	Cycling B cell
PSMD2	1.73439e-20	0.931052	0.331	0.129	6.35048e-16	Cycling B cell
HLA-DRB5	1.77442e-20	1.13774	0.365	0.156	6.49703e-16	Cycling B cell
KPNA2	1.91065e-20	1.00943	0.369	0.154	6.99583e-16	Cycling B cell
COX6B1	2.31032e-20	0.978026	0.597	0.352	8.45925e-16	Cycling B cell
PRELID1	2.40601e-20	1.02942	0.441	0.208	8.80961e-16	Cycling B cell
UQCRC1	2.65416e-20	1.02211	0.289	0.107	9.71819e-16	Cycling B cell
MRPS15	2.66094e-20	1.0131	0.281	0.103	9.74303e-16	Cycling B cell
PPIA	2.81727e-20	0.895291	0.703	0.476	1.03154e-15	Cycling B cell
LAPTM5	2.89132e-20	1.32871	0.529	0.295	1.05866e-15	Cycling B cell
RAB8A	2.94709e-20	1.14404	0.323	0.129	1.07908e-15	Cycling B cell
MRPS34	3.09126e-20	1.35407	0.319	0.129	1.13187e-15	Cycling B cell
TIMM13	3.17437e-20	1.09718	0.308	0.119	1.1623e-15	Cycling B cell
MLEC	3.78293e-20	1.20795	0.35	0.147	1.38512e-15	Cycling B cell
TRAPPC2L	3.9563e-20	1.05515	0.27	0.097	1.4486e-15	Cycling B cell
MDM2	4.00254e-20	1.12286	0.376	0.163	1.46553e-15	Cycling B cell
EHMT1	5.01087e-20	1.16409	0.456	0.222	1.83473e-15	Cycling B cell
LSM4	5.4343e-20	1.07129	0.289	0.108	1.98977e-15	Cycling B cell
PPP1R7	5.66844e-20	1.10577	0.327	0.133	2.0755e-15	Cycling B cell
MZT2B	7.89312e-20	1.18836	0.521	0.301	2.89007e-15	Cycling B cell
ACTB	8.12217e-20	0.888416	0.829	0.637	2.97393e-15	Cycling B cell
ARPC5L	9.60988e-20	1.05962	0.369	0.158	3.51866e-15	Cycling B cell
TXN2	9.97621e-20	1.21919	0.304	0.12	3.65279e-15	Cycling B cell
NDUFAB1	1.00602e-19	1.0331	0.373	0.161	3.68353e-15	Cycling B cell
SSR4	1.16517e-19	1.52099	0.574	0.381	4.26626e-15	Cycling B cell
RPS3	1.494e-19	0.410756	0.886	0.502	5.47029e-15	Cycling B cell
PSMB6	1.56405e-19	1.01621	0.418	0.2	5.72676e-15	Cycling B cell
GRHPR	1.79171e-19	1.41376	0.255	0.093	6.56035e-15	Cycling B cell
LSP1	2.11118e-19	0.94508	0.433	0.203	7.73007e-15	Cycling B cell
SNU13	2.18134e-19	0.914951	0.57	0.321	7.98697e-15	Cycling B cell
ERLEC1	2.29989e-19	1.10799	0.373	0.167	8.42103e-15	Cycling B cell
RPS4X	2.32391e-19	0.498765	0.856	0.485	8.50899e-15	Cycling B cell
POLE3	2.56142e-19	0.992013	0.312	0.122	9.37866e-15	Cycling B cell
IFT57	3.06416e-19	1.05599	0.316	0.129	1.12194e-14	Cycling B cell
NDUFA11	3.22877e-19	0.709368	0.479	0.243	1.18222e-14	Cycling B cell
BLOC1S6	3.3508e-19	1.1633	0.357	0.159	1.2269e-14	Cycling B cell
MTDH	3.58128e-19	0.980333	0.65	0.405	1.31128e-14	Cycling B cell
BUB3	3.68953e-19	1.28845	0.418	0.199	1.35092e-14	Cycling B cell
CFL1	3.74517e-19	0.904057	0.753	0.519	1.37129e-14	Cycling B cell
POLR2L	3.90942e-19	0.743195	0.567	0.319	1.43143e-14	Cycling B cell
KHDRBS1	5.22842e-19	1.19491	0.532	0.289	1.91439e-14	Cycling B cell
MRPL55	6.0245e-19	1.16454	0.255	0.093	2.20587e-14	Cycling B cell
PSMA2	6.47949e-19	1.03803	0.388	0.181	2.37246e-14	Cycling B cell
PPP4C	7.08392e-19	1.07287	0.285	0.111	2.59378e-14	Cycling B cell
CHCHD1	7.1243e-19	0.839721	0.27	0.099	2.60856e-14	Cycling B cell
LYN	7.98245e-19	1.29225	0.338	0.148	2.92277e-14	Cycling B cell
SIAH2	8.13287e-19	1.11655	0.319	0.131	2.97785e-14	Cycling B cell
ODC1	1.057e-18	0.804839	0.43	0.201	3.8702e-14	Cycling B cell
NASP	1.14879e-18	0.890479	0.597	0.35	4.20628e-14	Cycling B cell
CHCHD2	1.21717e-18	0.893879	0.639	0.443	4.45666e-14	Cycling B cell
CYBC1	1.31913e-18	1.55118	0.266	0.101	4.83001e-14	Cycling B cell
UQCR10	1.54776e-18	0.906844	0.479	0.251	5.66711e-14	Cycling B cell
EIF4A3	1.57215e-18	0.576827	0.525	0.263	5.75642e-14	Cycling B cell
KPNB1	1.58359e-18	1.01426	0.494	0.257	5.79831e-14	Cycling B cell
C1QBP	1.66622e-18	0.962407	0.357	0.155	6.10086e-14	Cycling B cell
PSMB2	1.81859e-18	0.95925	0.35	0.153	6.65876e-14	Cycling B cell
NCL	2.22488e-18	0.666761	0.772	0.529	8.14641e-14	Cycling B cell
EMC6	2.24416e-18	1.0097	0.251	0.091	8.21699e-14	Cycling B cell
CYC1	2.41944e-18	0.769216	0.293	0.116	8.85877e-14	Cycling B cell
PABPC4	2.46317e-18	0.886956	0.449	0.218	9.01888e-14	Cycling B cell
ARHGDIB	2.54877e-18	0.829395	0.605	0.349	9.33231e-14	Cycling B cell
PA2G4	2.54985e-18	0.864571	0.494	0.255	9.33627e-14	Cycling B cell
RPS18	2.65915e-18	0.350644	0.901	0.513	9.73648e-14	Cycling B cell
CASP3	3.10597e-18	1.10032	0.285	0.111	1.13725e-13	Cycling B cell
RPS21	3.32672e-18	0.527694	0.802	0.478	1.21808e-13	Cycling B cell
CEP57	3.42115e-18	1.00011	0.365	0.164	1.25266e-13	Cycling B cell
ITGAE	4.09278e-18	1.1557	0.297	0.122	1.49857e-13	Cycling B cell
GTF2A2	4.36132e-18	0.918553	0.327	0.138	1.5969e-13	Cycling B cell
DNAJC15	4.39697e-18	0.776818	0.392	0.178	1.60995e-13	Cycling B cell
RPL36AL	5.08306e-18	0.821044	0.673	0.422	1.86116e-13	Cycling B cell
UBE2N	5.26332e-18	1.10785	0.414	0.199	1.92716e-13	Cycling B cell
CENPX	6.22747e-18	1.05055	0.251	0.092	2.28019e-13	Cycling B cell
LYPLA1	7.02889e-18	1.02703	0.323	0.135	2.57363e-13	Cycling B cell
PNN	7.19085e-18	0.81911	0.586	0.343	2.63293e-13	Cycling B cell
RAC2	7.21444e-18	0.752146	0.441	0.214	2.64157e-13	Cycling B cell
NDUFAF8	7.29017e-18	0.898702	0.293	0.115	2.6693e-13	Cycling B cell
PRDX1	7.855e-18	0.702126	0.62	0.377	2.87611e-13	Cycling B cell
TAGAP	9.44169e-18	0.757348	0.308	0.125	3.45708e-13	Cycling B cell
LARP7	1.00993e-17	1.04396	0.388	0.182	3.69787e-13	Cycling B cell
CCDC88C	1.14523e-17	0.94633	0.319	0.134	4.19325e-13	Cycling B cell
LSM7	1.43446e-17	1.0591	0.441	0.227	5.25227e-13	Cycling B cell
GGA2	1.73551e-17	1.34042	0.304	0.13	6.35456e-13	Cycling B cell
GMFG	1.74166e-17	0.927725	0.452	0.222	6.37708e-13	Cycling B cell
MTHFD2	1.74465e-17	0.697212	0.331	0.14	6.38804e-13	Cycling B cell
PABPC1	1.78136e-17	0.583617	0.935	0.733	6.52245e-13	Cycling B cell
HNRNPR	2.12035e-17	0.98399	0.544	0.305	7.76365e-13	Cycling B cell
SRSF10	2.40912e-17	1.03518	0.555	0.32	8.821e-13	Cycling B cell
ACADM	2.4255e-17	0.946047	0.289	0.117	8.88098e-13	Cycling B cell
ZBTB8OS	2.44138e-17	0.954484	0.312	0.131	8.93911e-13	Cycling B cell
ZNF706	2.53221e-17	0.851816	0.475	0.245	9.27169e-13	Cycling B cell
LMAN2	2.57525e-17	0.937047	0.388	0.187	9.42928e-13	Cycling B cell
HDGF	2.60582e-17	0.855733	0.388	0.18	9.54119e-13	Cycling B cell
SNX5	3.11147e-17	1.22588	0.338	0.15	1.13926e-12	Cycling B cell
TMEM256	3.23959e-17	1.06753	0.297	0.122	1.18617e-12	Cycling B cell
HLA-DQB1	3.27922e-17	0.993258	0.376	0.178	1.20069e-12	Cycling B cell
IL10RA	3.35204e-17	0.891206	0.3	0.121	1.22735e-12	Cycling B cell
SMARCA4	3.37479e-17	1.08527	0.3	0.126	1.23568e-12	Cycling B cell
ERH	4.05923e-17	1.03459	0.407	0.198	1.48629e-12	Cycling B cell
HLA-DPB1	4.07215e-17	0.739791	0.456	0.235	1.49102e-12	Cycling B cell
RPS23	4.16048e-17	0.310396	0.878	0.491	1.52336e-12	Cycling B cell
PARK7	4.32746e-17	0.764114	0.551	0.311	1.5845e-12	Cycling B cell
TMED9	4.37908e-17	1.0943	0.392	0.189	1.6034e-12	Cycling B cell
GARS	4.55264e-17	1.02193	0.289	0.117	1.66695e-12	Cycling B cell
2002-09-01	4.62033e-17	1.2494	0.361	0.165	1.69174e-12	Cycling B cell
PSMB1	4.66772e-17	0.904835	0.517	0.295	1.70909e-12	Cycling B cell
SRSF3	5.61788e-17	0.75082	0.692	0.458	2.05699e-12	Cycling B cell
NDUFAF3	5.73692e-17	1.22789	0.289	0.12	2.10057e-12	Cycling B cell
MRPL54	6.78326e-17	0.704782	0.293	0.119	2.48369e-12	Cycling B cell
RBM38	8.07528e-17	1.30539	0.297	0.126	2.95676e-12	Cycling B cell
ATP5ME	8.45595e-17	0.875611	0.532	0.315	3.09614e-12	Cycling B cell
RPL5	8.74906e-17	0.552413	0.81	0.505	3.20347e-12	Cycling B cell
RPN2	8.87605e-17	1.05052	0.422	0.22	3.24997e-12	Cycling B cell
ATP5PB	9.19124e-17	0.573056	0.361	0.163	3.36537e-12	Cycling B cell
CARHSP1	1.07516e-16	0.95941	0.323	0.139	3.9367e-12	Cycling B cell
POLR2J	1.07814e-16	0.809483	0.316	0.133	3.94759e-12	Cycling B cell
EPRS	1.09891e-16	1.33863	0.323	0.143	4.02366e-12	Cycling B cell
MRPL57	1.13456e-16	0.774621	0.354	0.158	4.15418e-12	Cycling B cell
SNRPF	1.30477e-16	0.989196	0.407	0.206	4.7774e-12	Cycling B cell
CRIP1	1.32295e-16	0.891554	0.399	0.192	4.84397e-12	Cycling B cell
PSMA3	1.38703e-16	0.688249	0.426	0.209	5.07859e-12	Cycling B cell
SFT2D1	1.43042e-16	0.957307	0.293	0.124	5.2375e-12	Cycling B cell
TUFM	1.52207e-16	1.00394	0.38	0.182	5.57307e-12	Cycling B cell
DNAJC10	2.06895e-16	0.800453	0.335	0.149	7.57547e-12	Cycling B cell
NDUFC2	2.18373e-16	0.920504	0.395	0.192	7.99571e-12	Cycling B cell
EIF5B	2.9248e-16	0.712325	0.582	0.334	1.07092e-11	Cycling B cell
FAM111A	4.03795e-16	1.19785	0.278	0.116	1.47849e-11	Cycling B cell
CDV3	4.22704e-16	0.92003	0.548	0.329	1.54773e-11	Cycling B cell
PPP1CC	4.84984e-16	0.876046	0.373	0.175	1.77577e-11	Cycling B cell
AP2S1	5.12643e-16	0.718626	0.354	0.159	1.87704e-11	Cycling B cell
SET	5.42083e-16	0.839842	0.601	0.384	1.98484e-11	Cycling B cell
SRSF2	5.64332e-16	0.866677	0.7	0.466	2.0663e-11	Cycling B cell
TUBA4A	6.21634e-16	0.32856	0.441	0.215	2.27611e-11	Cycling B cell
ACTG1	6.23746e-16	0.813952	0.783	0.608	2.28385e-11	Cycling B cell
ACP1	6.69137e-16	0.6761	0.338	0.151	2.45005e-11	Cycling B cell
GNL3	7.72371e-16	0.716712	0.407	0.2	2.82804e-11	Cycling B cell
NDUFB11	8.59729e-16	0.758543	0.483	0.266	3.1479e-11	Cycling B cell
NDUFS7	8.92371e-16	0.971797	0.327	0.149	3.26742e-11	Cycling B cell
HSPA4	9.44314e-16	1.25364	0.388	0.196	3.45761e-11	Cycling B cell
LPIN1	9.45445e-16	0.622609	0.388	0.186	3.46175e-11	Cycling B cell
TMEM208	9.519e-16	0.920526	0.293	0.125	3.48538e-11	Cycling B cell
PSMD7	9.6274e-16	1.01819	0.392	0.19	3.52507e-11	Cycling B cell
RPS15	1.0105e-15	0.50234	0.852	0.487	3.69993e-11	Cycling B cell
PCBP1	1.59184e-15	0.557386	0.563	0.313	5.82851e-11	Cycling B cell
RPL14	1.70013e-15	0.410871	0.814	0.485	6.22502e-11	Cycling B cell
RNF181	1.72978e-15	0.892112	0.323	0.145	6.3336e-11	Cycling B cell
NOP58	1.96853e-15	0.742731	0.544	0.311	7.20777e-11	Cycling B cell
ABCF1	2.20389e-15	0.617117	0.418	0.207	8.06953e-11	Cycling B cell
COPZ1	2.29273e-15	0.912593	0.27	0.112	8.39484e-11	Cycling B cell
CD53	2.48412e-15	0.85107	0.46	0.246	9.0956e-11	Cycling B cell
RPL11	2.81356e-15	0.279917	0.894	0.511	1.03018e-10	Cycling B cell
MRPL21	2.90763e-15	0.929915	0.251	0.1	1.06463e-10	Cycling B cell
EHD1	3.23379e-15	1.06526	0.304	0.136	1.18405e-10	Cycling B cell
BUD23	3.40237e-15	1.00015	0.304	0.133	1.24578e-10	Cycling B cell
EMC4	3.41806e-15	0.654866	0.3	0.128	1.25152e-10	Cycling B cell
RFTN1	3.77683e-15	1.08368	0.316	0.145	1.38289e-10	Cycling B cell
RPL15	3.8431e-15	0.426886	0.833	0.482	1.40715e-10	Cycling B cell
BIRC3	4.15012e-15	0.678771	0.532	0.308	1.51957e-10	Cycling B cell
SRRT	4.68968e-15	0.649138	0.285	0.12	1.71713e-10	Cycling B cell
C8orf59	4.6944e-15	1.41804	0.319	0.148	1.71885e-10	Cycling B cell
NDUFA12	5.03524e-15	0.682814	0.373	0.177	1.84365e-10	Cycling B cell
FAM107B	5.14203e-15	0.662422	0.578	0.347	1.88275e-10	Cycling B cell
HDAC1	5.33101e-15	1.23639	0.297	0.132	1.95195e-10	Cycling B cell
IER3IP1	5.83811e-15	0.924039	0.255	0.104	2.13763e-10	Cycling B cell
BTG2	6.16749e-15	0.807004	0.624	0.38	2.25823e-10	Cycling B cell
RPL28	7.74038e-15	0.284432	0.886	0.501	2.83414e-10	Cycling B cell
RPL10A	8.51115e-15	0.413487	0.783	0.477	3.11636e-10	Cycling B cell
SPCS2	8.58721e-15	1.0412	0.456	0.276	3.14421e-10	Cycling B cell
TXNDC17	1.01062e-14	0.423198	0.346	0.161	3.70038e-10	Cycling B cell
SUGP2	1.02401e-14	1.18728	0.3	0.136	3.74941e-10	Cycling B cell
PHAX	1.03869e-14	1.02967	0.259	0.108	3.80317e-10	Cycling B cell
NDUFB10	1.13246e-14	0.722839	0.407	0.21	4.1465e-10	Cycling B cell
ARPC1B	1.42771e-14	0.943963	0.437	0.237	5.22756e-10	Cycling B cell
ERGIC3	1.5561e-14	0.720837	0.312	0.14	5.69764e-10	Cycling B cell
DDOST	1.56391e-14	0.791981	0.297	0.133	5.72624e-10	Cycling B cell
RTRAF	1.61276e-14	0.815381	0.426	0.224	5.90511e-10	Cycling B cell
NAP1L1	1.66719e-14	0.786492	0.703	0.496	6.10442e-10	Cycling B cell
ATP5F1B	1.93148e-14	0.598728	0.506	0.292	7.07213e-10	Cycling B cell
GNAS	1.95577e-14	0.642237	0.738	0.545	7.16104e-10	Cycling B cell
SF3B6	2.18144e-14	0.769285	0.433	0.225	7.98734e-10	Cycling B cell
TOPBP1	2.21848e-14	1.02665	0.251	0.103	8.12295e-10	Cycling B cell
TPM3	2.51261e-14	0.727547	0.684	0.472	9.19992e-10	Cycling B cell
EIF4G1	2.5878e-14	0.540813	0.342	0.16	9.47521e-10	Cycling B cell
CALR	2.61272e-14	0.756377	0.597	0.395	9.56646e-10	Cycling B cell
PRDX5	2.62812e-14	0.542734	0.433	0.229	9.62286e-10	Cycling B cell
ILF2	3.13878e-14	0.87574	0.376	0.189	1.14926e-09	Cycling B cell
EIF2AK1	3.44373e-14	0.865524	0.278	0.121	1.26092e-09	Cycling B cell
DCTN3	3.62273e-14	0.911781	0.3	0.134	1.32646e-09	Cycling B cell
HMGN3	3.98936e-14	0.610872	0.392	0.197	1.46071e-09	Cycling B cell
CD52	4.20613e-14	0.523003	0.532	0.296	1.54007e-09	Cycling B cell
PSMB8	4.75994e-14	0.877431	0.38	0.19	1.74285e-09	Cycling B cell
NOP10	4.78668e-14	0.633412	0.411	0.213	1.75264e-09	Cycling B cell
GNG5	5.46203e-14	0.962874	0.456	0.263	1.99992e-09	Cycling B cell
GADD45GIP1	6.28317e-14	0.509149	0.395	0.201	2.30058e-09	Cycling B cell
CANX	6.3229e-14	0.519266	0.517	0.3	2.31513e-09	Cycling B cell
PCMT1	6.6692e-14	0.697818	0.342	0.161	2.44193e-09	Cycling B cell
NUDT5	6.7271e-14	0.700306	0.27	0.116	2.46313e-09	Cycling B cell
TMEM123	7.34458e-14	0.962117	0.43	0.24	2.68922e-09	Cycling B cell
LMAN1	7.83807e-14	1.04513	0.403	0.226	2.86991e-09	Cycling B cell
ARPC3	9.53133e-14	0.938681	0.593	0.394	3.4899e-09	Cycling B cell
PXK	1.05766e-13	1.06127	0.251	0.109	3.87262e-09	Cycling B cell
USP16	1.08099e-13	0.46455	0.414	0.212	3.95803e-09	Cycling B cell
NDUFB4	1.08672e-13	0.578209	0.449	0.244	3.97901e-09	Cycling B cell
ATP5F1D	1.14882e-13	0.809607	0.464	0.269	4.20641e-09	Cycling B cell
MCTS1	1.23527e-13	0.836929	0.255	0.108	4.52295e-09	Cycling B cell
RPS9	1.2614e-13	0.367545	0.837	0.504	4.61862e-09	Cycling B cell
RPN1	1.30601e-13	0.795334	0.278	0.124	4.78195e-09	Cycling B cell
ERP29	1.46792e-13	0.937795	0.479	0.274	5.37478e-09	Cycling B cell
SRP19	1.53427e-13	0.7028	0.354	0.173	5.61774e-09	Cycling B cell
ATP5F1E	1.53478e-13	0.452404	0.795	0.56	5.61958e-09	Cycling B cell
NDUFA3	1.56167e-13	0.888639	0.365	0.184	5.71807e-09	Cycling B cell
NUDC	1.58772e-13	0.67501	0.449	0.25	5.81343e-09	Cycling B cell
RPL23A	2.32506e-13	0.290572	0.753	0.469	8.51321e-09	Cycling B cell
CTCF	2.5339e-13	0.751812	0.327	0.158	9.27787e-09	Cycling B cell
UBE2I	2.60922e-13	1.02896	0.418	0.231	9.55367e-09	Cycling B cell
MTF2	2.62202e-13	1.34747	0.346	0.177	9.60051e-09	Cycling B cell
DNAJC8	2.70579e-13	0.732165	0.441	0.236	9.90726e-09	Cycling B cell
SMDT1	2.86932e-13	0.987856	0.38	0.199	1.0506e-08	Cycling B cell
SRP9	3.35156e-13	0.807699	0.346	0.172	1.22717e-08	Cycling B cell
LIMD2	3.46593e-13	1.19415	0.312	0.151	1.26905e-08	Cycling B cell
DCXR	3.50701e-13	0.633265	0.285	0.126	1.28409e-08	Cycling B cell
SCAND1	4.04538e-13	0.725008	0.388	0.199	1.48122e-08	Cycling B cell
HINT1	4.06328e-13	0.546104	0.643	0.428	1.48777e-08	Cycling B cell
ATF7IP2	4.25795e-13	0.714128	0.251	0.107	1.55905e-08	Cycling B cell
PRDX2	4.39001e-13	0.831364	0.357	0.183	1.6074e-08	Cycling B cell
TMEM243	4.43003e-13	0.906037	0.285	0.131	1.62205e-08	Cycling B cell
DOCK2	4.69802e-13	0.786973	0.285	0.131	1.72018e-08	Cycling B cell
HNRNPA1	4.75755e-13	0.651431	0.665	0.458	1.74198e-08	Cycling B cell
RPL24	4.75859e-13	0.434238	0.776	0.48	1.74236e-08	Cycling B cell
TRIB1	4.95096e-13	0.874777	0.262	0.116	1.81279e-08	Cycling B cell
RPS19BP1	5.01628e-13	1.42804	0.312	0.152	1.83671e-08	Cycling B cell
PRPF40A	5.45229e-13	0.721907	0.536	0.323	1.99636e-08	Cycling B cell
RBM3	5.63482e-13	0.542881	0.567	0.346	2.06319e-08	Cycling B cell
RPL7A	6.56056e-13	0.39931	0.806	0.489	2.40215e-08	Cycling B cell
TMEM131L	6.78297e-13	1.15405	0.262	0.121	2.48358e-08	Cycling B cell
PMAIP1	7.97528e-13	0.671065	0.369	0.192	2.92015e-08	Cycling B cell
EVI2B	8.41213e-13	0.566108	0.354	0.177	3.0801e-08	Cycling B cell
MRPL14	8.62645e-13	0.553641	0.278	0.124	3.15857e-08	Cycling B cell
COX7A2	9.0555e-13	0.695899	0.563	0.375	3.31567e-08	Cycling B cell
ANXA6	1.00061e-12	0.786004	0.323	0.155	3.66374e-08	Cycling B cell
SEM1	1.12905e-12	0.660279	0.498	0.295	4.13402e-08	Cycling B cell
MRPS18C	1.22942e-12	0.761291	0.259	0.114	4.50152e-08	Cycling B cell
RPL18	1.29358e-12	0.328003	0.802	0.489	4.73646e-08	Cycling B cell
VPS29	1.338e-12	0.751715	0.395	0.208	4.89908e-08	Cycling B cell
FDFT1	1.34954e-12	0.883615	0.278	0.126	4.94136e-08	Cycling B cell
LSM8	1.36322e-12	0.813931	0.357	0.183	4.99142e-08	Cycling B cell
PSMD8	1.38401e-12	0.662351	0.441	0.248	5.06756e-08	Cycling B cell
MRPS36	1.40557e-12	0.864266	0.262	0.117	5.14651e-08	Cycling B cell
SRSF9	1.45527e-12	0.939634	0.411	0.227	5.32848e-08	Cycling B cell
UCP2	1.53771e-12	1.16176	0.27	0.124	5.63032e-08	Cycling B cell
HNRNPA3	1.59578e-12	0.748181	0.608	0.416	5.84294e-08	Cycling B cell
IMMT	1.76107e-12	0.899809	0.304	0.144	6.44815e-08	Cycling B cell
ITSN2	1.77034e-12	0.811796	0.479	0.289	6.48211e-08	Cycling B cell
COX5B	2.07809e-12	0.665103	0.525	0.329	7.60892e-08	Cycling B cell
SMNDC1	2.25505e-12	0.650358	0.304	0.143	8.25685e-08	Cycling B cell
SELENOS	2.31379e-12	1.05038	0.407	0.236	8.47193e-08	Cycling B cell
PSMD4	2.83998e-12	0.617518	0.304	0.144	1.03986e-07	Cycling B cell
SUZ12	2.87254e-12	0.813895	0.361	0.187	1.05178e-07	Cycling B cell
CHCHD10	3.02584e-12	0.753979	0.346	0.179	1.10791e-07	Cycling B cell
EWSR1	3.09039e-12	0.533249	0.464	0.259	1.13155e-07	Cycling B cell
SERP1	3.22836e-12	0.570102	0.593	0.395	1.18206e-07	Cycling B cell
THOC7	3.34744e-12	0.892275	0.266	0.123	1.22567e-07	Cycling B cell
ZBTB38	3.40176e-12	0.523751	0.418	0.233	1.24556e-07	Cycling B cell
GLO1	3.55525e-12	0.601876	0.308	0.15	1.30176e-07	Cycling B cell
RALGPS2	3.57423e-12	0.627469	0.342	0.166	1.3087e-07	Cycling B cell
XRCC6	3.88459e-12	0.872661	0.437	0.248	1.42234e-07	Cycling B cell
TPI1	3.99343e-12	0.68335	0.567	0.363	1.46219e-07	Cycling B cell
NDUFV1	4.2508e-12	0.739081	0.293	0.138	1.55643e-07	Cycling B cell
MZT2A	4.84074e-12	0.84031	0.361	0.186	1.77244e-07	Cycling B cell
CCT6A	4.90809e-12	0.663904	0.441	0.245	1.7971e-07	Cycling B cell
BANF1	5.1369e-12	0.732738	0.293	0.139	1.88087e-07	Cycling B cell
NDUFA6	5.32165e-12	0.656675	0.354	0.183	1.94852e-07	Cycling B cell
BAZ1B	5.50808e-12	0.780924	0.384	0.208	2.01678e-07	Cycling B cell
SLC25A6	5.70703e-12	0.522245	0.624	0.4	2.08963e-07	Cycling B cell
POMP	5.89492e-12	0.868623	0.498	0.309	2.15843e-07	Cycling B cell
UFD1	6.19798e-12	0.670103	0.289	0.137	2.26939e-07	Cycling B cell
RPL6	6.49176e-12	0.374497	0.787	0.487	2.37696e-07	Cycling B cell
ITM2C	6.75121e-12	1.07184	0.255	0.119	2.47196e-07	Cycling B cell
USP7	6.77581e-12	0.696628	0.357	0.187	2.48096e-07	Cycling B cell
PRKCB	7.08711e-12	0.822786	0.251	0.113	2.59494e-07	Cycling B cell
CDK5RAP2	7.40384e-12	0.86215	0.266	0.124	2.71091e-07	Cycling B cell
ATOX1	7.5373e-12	0.860333	0.297	0.145	2.75978e-07	Cycling B cell
TERF2IP	8.16422e-12	0.793035	0.517	0.324	2.98933e-07	Cycling B cell
TPM4	9.53775e-12	0.452934	0.65	0.427	3.49225e-07	Cycling B cell
SRPRA	9.56601e-12	0.670316	0.304	0.149	3.50259e-07	Cycling B cell
ENO1	9.82163e-12	0.56657	0.574	0.371	3.59619e-07	Cycling B cell
BRD2	9.98453e-12	0.586647	0.597	0.387	3.65584e-07	Cycling B cell
SUB1	1.0599e-11	1.49857	0.548	0.431	3.88082e-07	Cycling B cell
TRABD	1.08298e-11	0.580025	0.278	0.129	3.96532e-07	Cycling B cell
SUPT5H	1.12698e-11	0.447038	0.361	0.188	4.12643e-07	Cycling B cell
RPL35A	1.14004e-11	0.339462	0.798	0.487	4.17427e-07	Cycling B cell
UBE2L3	1.18752e-11	0.733779	0.399	0.221	4.34812e-07	Cycling B cell
RPL12	1.22342e-11	0.283731	0.81	0.494	4.47954e-07	Cycling B cell
CDK11B	1.23858e-11	0.789063	0.251	0.113	4.53505e-07	Cycling B cell
PQBP1	1.73224e-11	0.661029	0.251	0.114	6.34258e-07	Cycling B cell
CWC15	1.88956e-11	0.695485	0.308	0.157	6.91862e-07	Cycling B cell
NDUFS8	1.90194e-11	0.934606	0.304	0.15	6.96397e-07	Cycling B cell
TXNL4A	1.97329e-11	0.594629	0.323	0.163	7.2252e-07	Cycling B cell
ATG3	2.04467e-11	0.704409	0.285	0.137	7.48656e-07	Cycling B cell
COX4I1	2.12571e-11	0.405834	0.715	0.498	7.7833e-07	Cycling B cell
CD37	2.14561e-11	0.656938	0.441	0.247	7.85614e-07	Cycling B cell
PSMA5	2.15574e-11	0.925557	0.335	0.176	7.89325e-07	Cycling B cell
RPL38	2.54534e-11	0.367777	0.722	0.454	9.31976e-07	Cycling B cell
SSR1	2.74217e-11	0.702599	0.316	0.162	1.00405e-06	Cycling B cell
VDAC1	2.74403e-11	0.497713	0.43	0.24	1.00473e-06	Cycling B cell
ZMAT2	2.75335e-11	0.339643	0.312	0.154	1.00814e-06	Cycling B cell
ETFB	2.94012e-11	0.735801	0.3	0.147	1.07652e-06	Cycling B cell
MPC2	2.95261e-11	0.824024	0.316	0.159	1.0811e-06	Cycling B cell
PTK2B	3.18427e-11	0.842662	0.262	0.124	1.16592e-06	Cycling B cell
DEK	3.33452e-11	1.42231	0.471	0.354	1.22094e-06	Cycling B cell
LAP3	3.85203e-11	0.745333	0.293	0.144	1.41042e-06	Cycling B cell
PHPT1	3.86099e-11	0.33218	0.338	0.174	1.4137e-06	Cycling B cell
ATP5PD	3.9178e-11	0.505284	0.403	0.224	1.4345e-06	Cycling B cell
SLIRP	4.60465e-11	0.465028	0.365	0.196	1.68599e-06	Cycling B cell
EEF2	4.85672e-11	0.495901	0.681	0.483	1.77829e-06	Cycling B cell
SPCS1	4.85862e-11	1.01028	0.414	0.252	1.77898e-06	Cycling B cell
NEDD8	5.02651e-11	0.671244	0.437	0.257	1.84046e-06	Cycling B cell
BRD7	5.91598e-11	0.705642	0.342	0.179	2.16614e-06	Cycling B cell
VOPP1	7.6051e-11	0.541528	0.312	0.157	2.78461e-06	Cycling B cell
CYBA	7.72571e-11	0.483375	0.616	0.413	2.82877e-06	Cycling B cell
SF3B5	7.76904e-11	0.690905	0.403	0.23	2.84464e-06	Cycling B cell
SSNA1	8.05145e-11	0.734519	0.259	0.121	2.94804e-06	Cycling B cell
RALY	8.51369e-11	0.558417	0.414	0.23	3.11729e-06	Cycling B cell
MRPS21	8.62537e-11	1.06808	0.38	0.217	3.15818e-06	Cycling B cell
LUC7L3	1.04365e-10	0.419156	0.62	0.422	3.82133e-06	Cycling B cell
MARCKSL1	1.08374e-10	1.58059	0.266	0.138	3.96812e-06	Cycling B cell
ADRM1	1.09496e-10	0.695337	0.289	0.143	4.0092e-06	Cycling B cell
NDUFC1	1.0966e-10	0.548731	0.323	0.166	4.01522e-06	Cycling B cell
KIAA1551	1.11001e-10	0.985885	0.323	0.168	4.0643e-06	Cycling B cell
CLINT1	1.1397e-10	0.508367	0.46	0.269	4.17302e-06	Cycling B cell
PSMC5	1.33203e-10	0.507627	0.335	0.172	4.87721e-06	Cycling B cell
STK17B	1.64013e-10	0.34615	0.548	0.333	6.00535e-06	Cycling B cell
FBL	1.67514e-10	0.475681	0.312	0.159	6.13351e-06	Cycling B cell
TRMT112	1.895e-10	0.611646	0.449	0.27	6.93854e-06	Cycling B cell
BUD31	1.93981e-10	0.394385	0.369	0.203	7.1026e-06	Cycling B cell
IFNAR1	1.96784e-10	0.604271	0.297	0.149	7.20526e-06	Cycling B cell
KDELR2	2.16913e-10	0.842858	0.323	0.178	7.94226e-06	Cycling B cell
SOCS1	2.19047e-10	1.24519	0.251	0.123	8.02041e-06	Cycling B cell
AUP1	2.35222e-10	0.597848	0.289	0.143	8.61265e-06	Cycling B cell
UBXN4	2.47141e-10	0.583359	0.544	0.347	9.04908e-06	Cycling B cell
ATP5MC2	2.53169e-10	0.539925	0.563	0.378	9.26978e-06	Cycling B cell
PSMC4	2.72478e-10	0.739017	0.266	0.127	9.97679e-06	Cycling B cell
PDCD5	2.81498e-10	0.695827	0.312	0.162	1.0307e-05	Cycling B cell
RBM8A	2.95477e-10	0.493437	0.548	0.353	1.08189e-05	Cycling B cell
SSB	3.02979e-10	0.615094	0.399	0.227	1.10936e-05	Cycling B cell
YWHAE	3.07325e-10	0.42135	0.555	0.359	1.12527e-05	Cycling B cell
PSMD13	3.09128e-10	0.624451	0.3	0.154	1.13187e-05	Cycling B cell
SUPT16H	3.32063e-10	0.725224	0.312	0.167	1.21585e-05	Cycling B cell
RNASEH2B	3.39499e-10	0.44094	0.266	0.128	1.24308e-05	Cycling B cell
2009-09-01	3.44618e-10	1.23316	0.251	0.12	1.26182e-05	Cycling B cell
MYL6	3.84406e-10	0.427658	0.776	0.607	1.4075e-05	Cycling B cell
HDLBP	4.49994e-10	0.557308	0.433	0.258	1.64765e-05	Cycling B cell
PIM1	4.60389e-10	0.680209	0.266	0.131	1.68572e-05	Cycling B cell
ATP5F1C	4.68633e-10	0.611453	0.399	0.231	1.7159e-05	Cycling B cell
CCT7	4.80123e-10	0.432086	0.3	0.153	1.75797e-05	Cycling B cell
FNBP1	5.28919e-10	0.627972	0.574	0.384	1.93664e-05	Cycling B cell
ACTR3	5.49531e-10	0.778786	0.521	0.353	2.01211e-05	Cycling B cell
SMARCA5	5.60453e-10	0.501416	0.494	0.308	2.0521e-05	Cycling B cell
MMADHC	5.98918e-10	0.412359	0.266	0.129	2.19294e-05	Cycling B cell
CDC5L	6.02418e-10	0.547416	0.331	0.178	2.20575e-05	Cycling B cell
CYTIP	6.74222e-10	0.363097	0.468	0.275	2.46866e-05	Cycling B cell
NARS	7.37709e-10	0.922489	0.266	0.133	2.70112e-05	Cycling B cell
HSPA9	7.60266e-10	0.921346	0.395	0.234	2.78371e-05	Cycling B cell
ISCU	7.98768e-10	0.288771	0.38	0.211	2.92469e-05	Cycling B cell
NCOA3	8.1333e-10	0.706515	0.411	0.244	2.97801e-05	Cycling B cell
PSMB7	8.36274e-10	0.43274	0.354	0.192	3.06202e-05	Cycling B cell
CACYBP	8.43135e-10	0.297118	0.479	0.288	3.08714e-05	Cycling B cell
[truncated: 25,698 more rows]

## Sheet: Table S2
Supplementary Table S2 - 3000 most variable genes used to identify cNMF modules, their cNMF weight in each programme, and which programme they are associated with
Genes	Immune-primed	Proliferative	Invasive	Stress repair	Stress adapted	Top Programme
S100A6	0.0344356	0.000178441	1.47968e-25	0.0279961	0.00325186	Immune-primed
TMSB10	0.0210138	0.00341653	1.47968e-25	0.000280712	0.0083415	Immune-primed
B2M	0.0163201	4.25979e-06	0.000227827	0.00132937	0.00944979	Immune-primed
FTH1	0.00924394	0.00361714	8.75672e-05	0.00115399	0.00208594	Immune-primed
S100A10	0.00915968	0.000329299	2.7453e-09	0.00544565	7.46741e-05	Immune-primed
TMSB4X	0.00781911	0.00160962	0.000147087	0.000805136	0.00181028	Immune-primed
FTL	0.00779658	0.00448828	6.37376e-17	0.00100943	0.00112599	Immune-primed
GAPDH	0.00713266	0.00161909	4.38441e-05	0.00114097	0.000498171	Immune-primed
ANXA2	0.00553176	0.00111943	0.000587187	0.000994729	0.00113415	Immune-primed
KRT18	0.00549794	0.00111578	0.000365655	0.000900983	0.00138499	Immune-primed
HLA-B	0.00546255	0.000597973	0.000445907	4.41103e-05	0.00516714	Immune-primed
UBB	0.00540797	0.00257485	1.47968e-25	0.00101612	0.0028852	Immune-primed
KRT19	0.00522831	3.74596e-09	0.000517081	0.000271338	0.00260711	Immune-primed
ACTG1	0.00504649	0.00145281	0.000404512	0.00115843	0.00460842	Immune-primed
S100P	0.00468819	0.000608468	0.000111644	0.00106946	0.00365873	Immune-primed
EIF1	0.00431382	0.00221551	3.38014e-05	0.00194789	0.00129508	Immune-primed
KRT8	0.00424765	0.000726422	0.000496473	0.001639	0.00117266	Immune-primed
ACTB	0.00415735	0.000866964	0.00068503	0.00173602	0.00104916	Immune-primed
S100A11	0.00414503	1.68828e-08	0.000202463	0.0037364	0.000179842	Immune-primed
GSTP1	0.0039867	0.00208535	2.31406e-05	0.000335602	0.000593463	Immune-primed
TXN	0.00361943	0.00191149	1.45347e-05	0.000227052	1.04471e-21	Immune-primed
LGALS3	0.00360893	0.000567611	0.000341048	4.54082e-05	0.00215417	Immune-primed
HLA-C	0.00357944	0.000311373	0.00054784	8.15038e-05	0.00244765	Immune-primed
COX6C	0.0035772	0.00312094	1.47968e-25	0.00038015	1.55572e-25	Immune-primed
IFI27	0.00353083	0.000136891	0.000226951	5.63965e-05	0.0017025	Immune-primed
FAU	0.0033815	0.00267314	1.47968e-25	0.00227828	0.000227503	Immune-primed
UBA52	0.00325255	0.00224792	1.47968e-25	0.00162793	0.000250146	Immune-primed
MYL12B	0.00323663	0.00111187	0.000202317	4.22487e-05	0.000971048	Immune-primed
COX7C	0.00310972	0.00146433	1.47968e-25	0.000338626	0.000300409	Immune-primed
MYL6	0.00309262	0.00148567	0.000142153	0.000415754	0.00189023	Immune-primed
EPCAM	0.00301729	0.00225837	0.000461955	5.80385e-05	0.00206367	Immune-primed
TM4SF1	0.00291581	1.69694e-25	0.000141274	4.36584e-25	0.00236725	Immune-primed
CFL1	0.0029134	0.000965264	9.75734e-05	0.000504031	0.000571409	Immune-primed
CD74	0.00282427	1.69694e-25	7.16418e-05	7.59594e-05	0.00122069	Immune-primed
TSPAN8	0.002789	0.000403143	0.000595962	2.57384e-06	0.00240638	Immune-primed
SPINK1	0.00277113	1.69694e-25	1.47968e-25	0.000530325	0.00272812	Immune-primed
NACA	0.00276573	0.00257604	4.78521e-05	0.00161153	1.55572e-25	Immune-primed
COX4I1	0.00275764	0.00157979	6.2448e-06	0.000741888	0.000272515	Immune-primed
CYSTM1	0.00272458	1.21817e-06	0.000418465	3.6173e-05	0.000991576	Immune-primed
CSTB	0.00268761	1.46382e-05	3.49619e-05	0.000161957	0.00017873	Immune-primed
PFN1	0.00252167	0.000890585	0.00013068	7.73103e-05	0.000111526	Immune-primed
COX8A	0.00245561	0.000733548	1.47968e-25	3.93577e-05	4.67592e-05	Immune-primed
NDUFA4	0.00244646	0.00208375	1.47968e-25	5.93668e-05	1.04044e-05	Immune-primed
COX6A1	0.00222563	0.000582226	1.47968e-25	0.000133596	3.97662e-05	Immune-primed
MIF	0.00220506	0.000598013	3.69024e-05	0.000561116	1.55572e-25	Immune-primed
RAC1	0.00214865	0.000775358	0.00044524	3.78447e-06	0.00102256	Immune-primed
IFITM3	0.00208966	0.000558727	0.000168057	4.36584e-25	1.28889e-09	Immune-primed
LGALS4	0.00207009	0.000659364	0.000343029	0.000945468	0.00110187	Immune-primed
UQCRQ	0.00206093	0.00096208	1.47968e-25	0.000647435	9.90849e-05	Immune-primed
COX7A2	0.00204763	0.00105968	1.68526e-05	0.000161812	1.1444e-10	Immune-primed
CD63	0.00203691	0.000302843	0.000499913	8.4347e-05	0.000842181	Immune-primed
BTF3	0.00200801	0.00118917	2.33062e-05	0.000136346	1.79773e-06	Immune-primed
DSTN	0.00198475	0.00181747	0.000227279	0.000455277	0.00134508	Immune-primed
CXCL3	0.00195475	2.43367e-05	0.000144866	0.000619269	0.000402795	Immune-primed
CLIC1	0.00195052	0.000344081	7.96788e-05	0.000254648	0.000716623	Immune-primed
TPM4	0.0019238	0.00141695	0.000309851	0.000111804	0.00116815	Immune-primed
COX6B1	0.00185959	0.000861196	1.6485e-05	0.000934779	0.000158965	Immune-primed
SPINT2	0.00183123	0.000258436	0.000367439	8.32683e-06	0.000652296	Immune-primed
PPIA	0.00181629	0.00143456	0.000138284	0.000866092	5.91656e-06	Immune-primed
PPDPF	0.00180972	0.000705462	0.000111498	0.0017841	0.000766033	Immune-primed
COX5B	0.00179754	0.00103626	1.47713e-06	0.00114866	0.000289552	Immune-primed
PDIA3	0.00178675	0.00108052	0.000498542	3.16488e-05	0.000916222	Immune-primed
YWHAZ	0.00178609	0.00150394	0.000740562	0.00174031	0.00058764	Immune-primed
ENO1	0.00178526	0.0015743	0.000121049	1.28528e-05	0.000223653	Immune-primed
PERP	0.00172633	0.00037683	0.000465296	0.000601547	0.000671467	Immune-primed
UQCRH	0.00172286	0.00132504	8.80304e-05	0.000208008	3.33312e-19	Immune-primed
MIEN1	0.00171038	5.97447e-05	1.31386e-05	4.36584e-25	3.0208e-07	Immune-primed
NFKBIA	0.00165155	0.000623603	6.74251e-05	0.00155494	0.00121225	Immune-primed
HINT1	0.00164754	0.000891582	5.10039e-05	0.000122968	1.55572e-25	Immune-primed
TSPO	0.0016453	8.25143e-05	3.72273e-05	0.000111448	0.000401343	Immune-primed
TPI1	0.00163604	0.000114876	0.000130754	0.00104405	0.000312157	Immune-primed
ATP5MC3	0.001616	0.000580948	2.01334e-05	6.52805e-05	0.000221156	Immune-primed
COX7B	0.00161394	0.000700928	1.08176e-05	0.000397533	9.61413e-11	Immune-primed
SEM1	0.00158557	0.000803837	8.5168e-05	0.000142138	0.000753509	Immune-primed
MYL12A	0.00157955	0.000719348	0.000185571	0.000162569	0.000436734	Immune-primed
UQCR11	0.00154472	0.000918138	1.92128e-07	0.000371302	9.46428e-05	Immune-primed
LDHA	0.00154315	0.000476507	0.000150854	0.000560456	6.52134e-05	Immune-primed
CST3	0.00150719	0.00056797	0.000210008	0.00086054	0.0007834	Immune-primed
C19orf33	0.00150396	2.12609e-06	0.000131182	0.00116801	0.00077732	Immune-primed
OAZ1	0.00149783	0.000896746	4.98307e-05	0.00049449	0.000717046	Immune-primed
TMBIM6	0.00148202	0.000595207	0.000404322	6.85309e-06	0.00113979	Immune-primed
CXCL2	0.00147515	1.69694e-25	3.99545e-05	0.000334074	0.000257698	Immune-primed
UBL5	0.00147073	0.000718142	1.47968e-25	0.00055365	0.000125661	Immune-primed
PPIB	0.00145882	0.000489437	0.000242925	0.000338475	8.61263e-05	Immune-primed
GUK1	0.0014498	0.000495834	0.000121132	0.000203812	0.000152862	Immune-primed
PRDX1	0.0014454	0.000726028	5.0797e-05	0.000350243	0.000269591	Immune-primed
ATP1B1	0.00143197	0.000667337	0.000654386	0.00024534	0.00110545	Immune-primed
MGST3	0.00142202	0.000274147	0.000190893	0.000662223	6.18484e-13	Immune-primed
PUM3	0.00142129	0.000683579	0.00022301	0.00013645	3.78772e-05	Immune-primed
TAGLN2	0.00139195	0.000128198	0.000181986	0.000584202	0.000622039	Immune-primed
ATP5MG	0.00137224	0.000783791	2.52203e-05	0.000369637	1.22041e-05	Immune-primed
NDUFA1	0.00133072	0.00127335	1.47968e-25	0.000615576	0.000233105	Immune-primed
GPX4	0.00132943	0.000384033	1.47968e-25	0.000240217	0.000202962	Immune-primed
SLC25A6	0.00132709	0.00116933	3.15402e-05	8.37275e-05	0.000367055	Immune-primed
TMEM258	0.00132615	0.00024152	3.00379e-05	0.000233929	0.000151617	Immune-primed
NDUFB9	0.00130726	0.00108756	1.49194e-05	0.000215836	3.51582e-05	Immune-primed
TUBA1B	0.00130331	0.000897588	2.38803e-05	0.000870425	0.000253143	Immune-primed
EDF1	0.00129212	0.000766231	0.000113596	0.000465088	0.000479625	Immune-primed
DBI	0.00128938	0.000841207	9.98713e-07	0.000536716	7.24712e-05	Immune-primed
SSR4	0.00126712	0.000627355	0.000220063	0.000328779	0.000577002	Immune-primed
RAN	0.00126665	0.00120733	2.60487e-07	2.16368e-05	1.55572e-25	Immune-primed
HNRNPA1	0.00125223	0.00110076	0.000191325	0.000644894	0.000331057	Immune-primed
PHLDA2	0.00125132	0.000178361	2.25472e-05	0.000314197	0.00087336	Immune-primed
POMP	0.00123629	0.0011921	8.5052e-05	5.53969e-06	6.17964e-05	Immune-primed
DYNLL1	0.00123115	0.000604148	5.463e-05	0.000573583	0.000641174	Immune-primed
ARF1	0.00121903	0.000529649	0.000145777	0.000201122	0.000231827	Immune-primed
SELENOW	0.00118952	0.000225855	0.000194573	0.000523025	0.000298709	Immune-primed
ATP5MC2	0.00118528	0.00102781	1.92777e-05	0.000158931	1.55572e-25	Immune-primed
S100A16	0.00117822	6.93773e-07	0.000123993	0.00020034	0.000133766	Immune-primed
PFDN5	0.0011748	0.000684826	6.86232e-05	0.000927778	0.00055163	Immune-primed
OST4	0.00116953	0.000720603	1.25614e-06	0.000264286	2.05486e-05	Immune-primed
HLA-DRA	0.00116867	8.55111e-07	4.42782e-05	2.19085e-06	0.000397432	Immune-primed
POLR2L	0.00116467	0.000485466	1.18978e-05	0.000206427	9.87637e-05	Immune-primed
SERPINB1	0.00116127	0.000554235	0.000381804	0.000399203	0.00069493	Immune-primed
S100A14	0.00115854	0.000306424	7.95718e-05	0.000450533	0.000593508	Immune-primed
SH3BGRL3	0.00115329	0.000192564	7.33784e-05	0.000407798	0.00054633	Immune-primed
TOMM7	0.0011382	0.000918715	5.81684e-17	0.00109151	0.000352466	Immune-primed
PSME1	0.00112727	0.000777915	1.14898e-05	0.000104955	9.69012e-05	Immune-primed
LIMA1	0.00112369	0.00109719	0.000644573	0.00028799	0.000681517	Immune-primed
OCIAD2	0.00112256	0.000160554	9.19924e-05	1.09534e-07	0.000144164	Immune-primed
S100A4	0.00111897	0.000570013	6.75736e-05	8.18816e-06	1.75552e-05	Immune-primed
DNAJC15	0.00111752	0.000435987	0.000356537	0.000147192	8.0642e-06	Immune-primed
ARPC3	0.00110842	0.000355004	0.000160567	4.93167e-06	8.11879e-05	Immune-primed
PSME2	0.00110251	0.000560932	0.000116228	1.17822e-05	8.40279e-05	Immune-primed
MDK	0.00109408	0.000263595	0.000133277	0.00035765	0.000276592	Immune-primed
NDUFB2	0.00108792	0.000738653	5.82884e-06	0.000329874	4.78901e-05	Immune-primed
IL32	0.00108095	4.47288e-07	9.66113e-05	0.000311533	0.000128032	Immune-primed
CIB1	0.00107987	1.10461e-05	8.18323e-05	0.000144709	0.000445999	Immune-primed
RHOA	0.00107934	0.000382838	0.000209545	0.000110376	0.000400021	Immune-primed
NDUFS5	0.00104801	0.000587651	1.47968e-25	0.000468779	0.000130644	Immune-primed
ATP5PF	0.00103726	0.000383873	8.7739e-06	3.13077e-05	5.28324e-05	Immune-primed
COX5A	0.00102717	0.000585119	2.38176e-05	0.000280306	7.53377e-05	Immune-primed
IFI6	0.00102695	7.71941e-17	0.000246139	4.36584e-25	0.000862217	Immune-primed
HLA-DRB1	0.0010143	1.69694e-25	4.33235e-05	5.54787e-07	0.00032934	Immune-primed
SLIRP	0.00100215	0.000898311	2.82081e-05	0.000125412	1.55572e-25	Immune-primed
VDAC1	0.00100183	0.000993854	0.000154207	0.000371074	3.05486e-05	Immune-primed
CACYBP	0.00100083	0.000619896	5.1967e-06	0.000157338	0.000255867	Immune-primed
PGK1	0.000999762	0.000786942	0.000210834	4.47345e-05	0.000272452	Immune-primed
ANXA4	0.00099972	0.000763824	0.000880336	2.22556e-05	0.000590781	Immune-primed
RAB2A	0.000999122	0.000192795	0.000589856	1.28039e-05	0.000145394	Immune-primed
UQCR10	0.000998348	0.00039636	1.74718e-05	0.000137727	0.000119733	Immune-primed
ARPC5	0.000998205	0.000826995	0.00011191	3.75526e-06	0.000317474	Immune-primed
ATP5MF	0.000976341	0.000461103	2.88757e-07	0.00038716	0.00014082	Immune-primed
MT2A	0.000968868	0.000232176	9.72711e-05	0.000683724	0.000287964	Immune-primed
TUBA1C	0.00095265	0.000643577	0.000113911	0.000148365	0.000607319	Immune-primed
SAP18	0.000940527	0.000701466	1.50782e-05	0.000572565	0.000402412	Immune-primed
CXCL1	0.000938018	7.06465e-13	1.68113e-05	0.000190954	0.00023203	Immune-primed
TIMP1	0.000934578	0.000156126	0.000346478	1.10266e-06	0.000417754	Immune-primed
PKM	0.000932348	0.000502849	0.000430472	0.000324709	0.000285063	Immune-primed
JPT1	0.000930799	0.000373454	9.78064e-05	0.000562701	0.000367514	Immune-primed
SEC61G	0.000916395	0.000251793	2.74989e-05	0.000292334	0.000164501	Immune-primed
PRDX5	0.0009093	0.000217363	1.39931e-05	4.40812e-05	0.000515727	Immune-primed
C12orf75	0.000908259	0.000126999	0.0002788	0.000131005	0.000122353	Immune-primed
CCL20	0.000906365	4.50047e-05	1.34756e-05	0.000538111	0.000202298	Immune-primed
PTGES3	0.000897691	0.000772536	0.000304118	0.000278422	0.0001812	Immune-primed
CD9	0.000879161	8.38768e-05	0.000259912	4.36584e-25	0.000554724	Immune-primed
CLTA	0.000874897	0.000710782	0.000195749	4.36584e-25	0.000146047	Immune-primed
SEC61B	0.000869515	0.000389859	3.23887e-05	1.0675e-05	6.54209e-05	Immune-primed
ANXA5	0.000868862	0.000236831	0.000126348	4.36584e-25	0.000819052	Immune-primed
PCBP1	0.000867547	0.000316685	9.14915e-05	5.46526e-05	0.000668916	Immune-primed
SF3B6	0.00086705	0.000785901	7.152e-06	4.3509e-06	7.11053e-05	Immune-primed
ZNF706	0.000866186	9.75578e-05	0.000197796	0.000446216	0.000111255	Immune-primed
NDUFA13	0.000862947	0.000318834	7.6205e-05	4.36042e-05	0.00046675	Immune-primed
PSMB3	0.000860943	0.000223181	0.000133043	4.36584e-25	2.617e-05	Immune-primed
ATP5F1B	0.000854596	0.000615932	0.000103876	7.6599e-05	0.000177922	Immune-primed
CXCL8	0.000838288	0.000398981	1.47968e-25	0.000446156	0.00063679	Immune-primed
SNU13	0.00082787	0.000468821	6.35086e-05	9.41297e-05	0.000197146	Immune-primed
ELOC	0.000825632	0.000411494	8.96464e-05	3.9651e-05	0.000119909	Immune-primed
PSMB4	0.00082099	0.000374337	2.4334e-05	0.000130692	3.86872e-05	Immune-primed
ATP5PD	0.000818162	0.000814843	5.50238e-08	0.000101394	1.55572e-25	Immune-primed
HEBP2	0.000807605	0.000356597	0.000261716	0.000625197	0.000309646	Immune-primed
EIF3K	0.000787572	0.000480229	0.000102337	0.000131123	9.12994e-05	Immune-primed
BCAP31	0.000780623	0.000112097	0.000277942	7.36054e-05	1.55572e-25	Immune-primed
TXNDC17	0.000775124	0.00050499	1.13092e-05	0.000185006	0.000174487	Immune-primed
TRMT112	0.000772476	0.000583109	1.47968e-25	2.1872e-05	2.1444e-15	Immune-primed
NDUFB4	0.000772081	0.0003007	1.33525e-05	9.2068e-05	7.90857e-05	Immune-primed
DMAC1	0.000765639	9.44576e-05	9.59396e-06	4.36584e-25	1.55572e-25	Immune-primed
NDUFC1	0.000764695	0.000416631	1.52985e-05	8.95744e-05	1.31352e-05	Immune-primed
CYC1	0.000759077	0.000184307	4.71912e-05	0.000477802	7.30369e-08	Immune-primed
RBM8A	0.000754822	0.000567293	4.12861e-05	0.000597378	0.000174427	Immune-primed
EIF5A	0.000753104	0.000275246	7.95147e-05	0.00028062	3.44209e-05	Immune-primed
SKP1	0.000752685	0.000508925	8.8349e-05	0.000184211	0.00024301	Immune-primed
ECHS1	0.000752368	0.000288795	2.96216e-05	3.92631e-05	0.000373552	Immune-primed
MYDGF	0.000750816	0.00018735	7.14298e-05	0.000102787	0.000249221	Immune-primed
ATP6V1G1	0.000750749	0.000225822	4.75277e-05	5.90356e-05	0.000432417	Immune-primed
GPX2	0.000744441	0.000666015	0.000208547	0.00026962	0.000482337	Immune-primed
ATP5PO	0.000737923	0.000364848	4.77599e-05	3.95041e-05	0.000110146	Immune-primed
SELENOH	0.000737684	0.000680998	3.55357e-05	0.000264504	0.000185704	Immune-primed
MLEC	0.000729328	0.000632748	0.000235189	0.000557352	0.000118432	Immune-primed
SUMO2	0.000726796	0.000173096	0.000102078	9.58871e-06	1.55572e-25	Immune-primed
NOP10	0.000725097	0.000262504	1.30518e-06	9.2176e-05	7.30567e-05	Immune-primed
ISG15	0.00071993	1.69694e-25	8.07807e-05	6.83102e-05	0.000434446	Immune-primed
LY6E	0.000718974	0.000154656	0.000139021	4.36584e-25	0.00014039	Immune-primed
PSMB1	0.000711586	0.000496864	4.95338e-05	5.67175e-05	0.000327833	Immune-primed
WDR45B	0.000709322	0.000221434	0.000272258	0.000351376	0.000228897	Immune-primed
ANAPC11	0.000704062	0.00046042	3.02141e-07	4.17735e-05	1.55572e-25	Immune-primed
PARK7	0.000703757	0.000539151	3.87855e-05	0.00014595	8.34327e-05	Immune-primed
NDUFA6	0.000701031	0.00028904	2.06978e-06	9.4773e-05	1.97246e-19	Immune-primed
PSMA2	0.000695951	0.000334183	3.89779e-05	4.36584e-25	0.000142091	Immune-primed
SNRPD3	0.000694432	0.000402722	3.4404e-06	0.000121124	9.71527e-06	Immune-primed
SNRPC	0.000691707	0.000483726	2.09108e-05	6.54465e-07	2.31646e-13	Immune-primed
BIRC3	0.000683785	1.69694e-25	0.000413003	4.36584e-25	0.000622653	Immune-primed
PDCD5	0.000681466	0.000611918	4.33061e-05	0.000132321	1.55572e-25	Immune-primed
MGST1	0.000681272	2.81576e-06	0.000270131	4.28517e-05	3.7989e-05	Immune-primed
BRI3	0.000680948	9.0457e-05	0.000188691	0.000113826	0.000448987	Immune-primed
SMARCA2	0.000679511	0.000106684	0.00016229	1.26564e-05	0.000126872	Immune-primed
GNG5	0.000679098	0.000195111	9.15617e-05	7.39353e-05	5.65239e-05	Immune-primed
PHPT1	0.000677724	4.30262e-05	5.41522e-05	7.96351e-05	0.000136692	Immune-primed
ATP5F1C	0.00067518	0.000534055	0.000141304	5.48214e-05	9.16784e-06	Immune-primed
TRAM1	0.000674286	7.36373e-05	0.000318868	1.81588e-07	0.000252799	Immune-primed
GOLIM4	0.000673216	0.000627883	0.000253198	4.36584e-25	8.45471e-05	Immune-primed
PSMD8	0.000672549	9.61384e-05	5.41271e-05	0.000154982	0.000134279	Immune-primed
GADD45GIP1	0.000672296	0.000537671	1.47968e-25	0.000388098	0.000231039	Immune-primed
LAMTOR5	0.000667261	0.000397706	2.14634e-05	1.93608e-05	0.000105764	Immune-primed
HSBP1	0.00066552	0.000189551	3.13025e-05	5.40281e-05	0.000179596	Immune-primed
LDHB	0.000664697	0.000588796	2.85152e-05	1.7873e-05	1.55572e-25	Immune-primed
PSMD3	0.000661233	7.23249e-05	0.000245954	2.69742e-05	1.02966e-07	Immune-primed
CLINT1	0.000660033	0.000536863	0.000420162	0.00036714	0.000572193	Immune-primed
KDELR1	0.000659604	0.000263421	0.000220514	6.62537e-05	0.000275775	Immune-primed
SELENOF	0.000658442	0.000262211	0.000188482	0.000153004	0.000154036	Immune-primed
SERP1	0.000655093	0.000434373	0.000147837	0.000300543	0.000483174	Immune-primed
C1QBP	0.00065353	0.00056964	1.86489e-17	4.36584e-25	1.55572e-25	Immune-primed
COX17	0.00065346	0.000304436	1.52529e-05	0.000109977	4.58736e-05	Immune-primed
PDZK1IP1	0.000648058	1.69694e-25	5.89335e-05	4.71771e-05	4.72367e-05	Immune-primed
JTB	0.000647001	0.000277793	8.71717e-05	9.02486e-05	0.000287505	Immune-primed
TMEM59	0.000644462	6.33122e-05	0.000221613	1.32486e-05	0.000406023	Immune-primed
RAB5IF	0.000642855	0.000284215	0.000271805	6.46532e-05	5.88651e-05	Immune-primed
NDUFAB1	0.00064276	0.000435339	2.09047e-05	4.36584e-25	1.83862e-05	Immune-primed
CTSE	0.000641351	5.49983e-08	1.47968e-25	5.03309e-05	0.000510494	Immune-primed
EPSTI1	0.000639207	1.52972e-05	0.000512886	4.36584e-25	0.000146762	Immune-primed
NPC2	0.000637729	0.000367232	6.74125e-05	4.37577e-20	0.000173257	Immune-primed
NDUFA2	0.000637585	0.000103472	4.62774e-06	0.000292438	0.000212407	Immune-primed
C1orf43	0.000628437	0.000351227	0.000123681	5.90718e-25	0.000214282	Immune-primed
CTSB	0.00062405	5.95335e-05	0.000446189	0.000316668	0.000432584	Immune-primed
DYNLRB1	0.000620075	0.000564382	3.83993e-05	9.36264e-05	3.1007e-05	Immune-primed
GPX1	0.000615985	0.00013514	1.47968e-25	4.36584e-25	0.00025294	Immune-primed
ADAM9	0.000615753	1.69694e-25	0.00054636	3.15847e-05	0.000271176	Immune-primed
TIMM13	0.000615713	0.000503337	2.865e-08	0.000372605	8.18277e-05	Immune-primed
EFHD2	0.000612905	6.11796e-05	0.00012236	7.39562e-05	0.00040545	Immune-primed
SSR2	0.000612399	0.000152491	0.00015369	4.85042e-06	0.000286257	Immune-primed
RAB11A	0.00061182	2.51243e-05	0.000243683	3.46223e-05	0.000173954	Immune-primed
NEDD8	0.000608708	0.000325252	6.95233e-05	1.2633e-05	0.000142776	Immune-primed
PLAC8	0.000608324	1.69694e-25	0.000374254	2.26468e-05	0.00021724	Immune-primed
MRPS21	0.00060398	0.000375373	0.000127512	3.88775e-05	6.84118e-05	Immune-primed
EIF6	0.000602562	0.000423659	0.000191597	0.000186467	0.000120541	Immune-primed
AK3	0.000599335	0.000114001	0.000287981	2.50282e-06	7.19147e-19	Immune-primed
PSMB6	0.000598837	0.000431724	1.50166e-05	6.46643e-05	9.09908e-05	Immune-primed
ATP5MC1	0.000593179	0.000347525	2.58153e-05	0.000308798	1.55572e-25	Immune-primed
DAD1	0.000590205	0.000203761	0.000101508	1.5004e-05	9.40418e-05	Immune-primed
MRPL14	0.000588339	0.0001769	3.67804e-05	4.36584e-25	0.000161383	Immune-primed
OCIAD1	0.000586664	0.000445913	0.000186196	3.69169e-06	0.000133703	Immune-primed
NDUFC2	0.000585015	0.00039894	5.95649e-05	4.36584e-25	3.17667e-05	Immune-primed
APLP2	0.000584653	0.00028685	0.000304324	3.16642e-05	0.0005502	Immune-primed
COTL1	0.000581971	7.26443e-05	0.000122491	4.36584e-25	0.000146378	Immune-primed
PRDX2	0.000580239	0.000390932	9.99385e-06	0.000232769	2.01169e-16	Immune-primed
GTF2A2	0.000578703	0.000206656	5.81136e-05	5.17434e-05	1.55572e-25	Immune-primed
VAMP8	0.000576834	0.000128249	6.85861e-05	5.62329e-05	0.000331772	Immune-primed
MRPL13	0.000574174	0.000282722	4.33646e-05	4.36584e-25	4.51219e-09	Immune-primed
SNRPG	0.00057215	0.000558746	6.81677e-05	0.000185141	1.55572e-25	Immune-primed
CTSS	0.000571215	0.000169154	0.000197138	0.000163768	0.000201763	Immune-primed
NME1	0.000570738	0.000494515	1.47968e-25	4.36584e-25	1.55572e-25	Immune-primed
EIF1AX	0.000568211	0.000509656	0.000163404	0.000242775	8.0245e-05	Immune-primed
ARL6IP5	0.000566028	7.71777e-05	0.000108225	2.24989e-05	0.000177305	Immune-primed
NHP2	0.00056575	0.000481861	1.47968e-25	7.3425e-05	1.55572e-25	Immune-primed
UFC1	0.000564661	0.000181568	2.63333e-05	0.000549094	0.000108195	Immune-primed
C19orf53	0.000563296	0.000342488	5.83881e-06	0.000414165	7.78778e-05	Immune-primed
PSMC5	0.000560674	0.000269938	1.98818e-05	3.5399e-05	0.000253246	Immune-primed
TUBB	0.000559021	0.000488344	9.4627e-05	6.75949e-05	0.000161292	Immune-primed
SYAP1	0.000558865	0.000434339	0.000112768	0.000127618	0.000354665	Immune-primed
UBE2D3	0.000554097	0.00027728	0.00042841	0.000399531	0.000469928	Immune-primed
ERP29	0.000552045	0.00024738	0.000103789	6.60144e-05	9.37993e-05	Immune-primed
SF3B5	0.000550172	0.000283181	5.20353e-06	0.000253921	0.000208692	Immune-primed
CKS2	0.000545174	0.000439818	6.43307e-06	8.87125e-05	6.92181e-06	Immune-primed
AURKAIP1	0.000544957	0.000298612	2.52902e-05	0.000244557	0.000115394	Immune-primed
GPI	0.000544733	0.000113815	0.000286873	7.996e-05	0.000154965	Immune-primed
CD164	0.000540483	0.000535712	0.000338344	0.000356037	0.00045006	Immune-primed
MDH2	0.000538337	0.000306738	4.32336e-05	0.000137129	0.000126545	Immune-primed
SCP2	0.000535132	0.000355538	0.000164895	8.9389e-05	0.000244473	Immune-primed
NAA38	0.000533805	0.000107805	8.03066e-05	0.000299465	3.36418e-09	Immune-primed
SRI	0.000533717	0.000194847	8.87686e-05	5.7555e-05	0.000109421	Immune-primed
PDXK	0.00053327	1.69694e-25	0.000323946	6.02096e-06	0.000186388	Immune-primed
HNRNPF	0.000531585	0.000488131	0.000223779	0.000129289	0.000392369	Immune-primed
MRPS34	0.000530133	0.000119017	3.12666e-05	0.000202023	1.79004e-05	Immune-primed
ARPC1B	0.000526707	0.000311877	0.000191746	4.36584e-25	0.000302802	Immune-primed
PSMD1	0.000519517	0.000421868	0.000482411	0.000334452	4.99051e-05	Immune-primed
TMEM123	0.000519048	0.000411919	0.000350098	2.15244e-05	0.000119953	Immune-primed
BUD23	0.00051578	0.000224086	9.98251e-05	0.000116036	0.000411794	Immune-primed
NDUFB11	0.000514293	0.000351746	1.12845e-05	0.000136062	3.7207e-05	Immune-primed
LAMTOR2	0.000513802	0.000131706	7.92434e-06	0.000113102	3.11431e-05	Immune-primed
POLR2K	0.000513776	0.000372356	6.83272e-07	1.09379e-05	2.18165e-05	Immune-primed
EIF3I	0.000513057	0.000356302	1.97433e-05	2.45526e-05	7.03455e-05	Immune-primed
CHMP2B	0.000510813	0.000289993	8.14477e-05	3.76372e-05	0.000429404	Immune-primed
ATP6V0B	0.000510094	0.000169939	0.000147441	4.3112e-05	0.000242031	Immune-primed
SRP9	0.000509907	0.000332619	0.000103961	2.84232e-05	1.9173e-05	Immune-primed
MRPL41	0.000509831	5.68457e-05	3.19935e-05	0.000325878	9.54935e-05	Immune-primed
FAM162A	0.000508176	0.000265683	7.32677e-05	6.23238e-05	1.55572e-25	Immune-primed
DYNLT1	0.000507172	0.000211098	7.69265e-05	1.85679e-05	7.41214e-07	Immune-primed
VPS28	0.000505593	6.71118e-05	0.000110617	0.000475281	0.000102936	Immune-primed
ATP6V0E1	0.000501857	5.463e-05	0.000200429	4.36584e-25	0.000162285	Immune-primed
NDUFA11	0.000499935	0.000477726	4.01251e-05	0.000152756	0.000113075	Immune-primed
NDUFA12	0.000499251	0.000292231	3.92497e-05	0.000221894	5.16581e-11	Immune-primed
RBX1	0.000497999	0.000179048	0.000106294	5.41168e-05	0.000103702	Immune-primed
LAPTM4A	0.000497921	0.00013029	0.000160993	4.36584e-25	0.000497697	Immune-primed
PCBP2	0.000497739	0.000358302	0.000402298	0.000290522	0.000488349	Immune-primed
PRDX6	0.000495814	0.000439469	7.28266e-05	7.53136e-20	7.52324e-05	Immune-primed
PSMB8	0.00049501	8.09318e-05	7.49905e-05	3.29681e-05	9.51966e-05	Immune-primed
VPS29	0.000493951	0.000132359	0.000197206	8.55339e-05	6.55445e-05	Immune-primed
CD59	0.00049372	1.69694e-25	0.000366616	4.36584e-25	0.000338297	Immune-primed
MPC2	0.000492893	0.000157569	3.62921e-05	7.79438e-19	9.76155e-08	Immune-primed
NDUFB10	0.000491889	0.000223053	1.3807e-05	0.000383989	0.000114917	Immune-primed
MAP1LC3B	0.000491197	0.000325161	3.42465e-05	0.000257358	0.000260758	Immune-primed
PRDX4	0.000490027	7.63452e-05	5.2613e-05	2.59586e-07	1.64317e-05	Immune-primed
NDUFB3	0.000489076	0.000219847	2.08448e-05	0.000246547	5.69966e-05	Immune-primed
PLP2	0.000488885	8.91037e-05	0.00018597	8.43468e-05	2.14626e-05	Immune-primed
MRPL52	0.000483034	0.000272304	8.29682e-05	7.3533e-05	0.000159911	Immune-primed
VDAC2	0.000481368	0.000377101	0.000164669	0.000148532	4.69453e-05	Immune-primed
TMED10	0.000481351	0.000263654	0.000228136	6.5771e-05	0.000252833	Immune-primed
TMED2	0.000481115	0.000104478	0.000129223	4.11043e-05	0.000215663	Immune-primed
C12orf57	0.000478184	0.000124981	2.80327e-06	0.000445731	0.000141005	Immune-primed
NDUFB8	0.000477658	0.000405049	5.17592e-05	0.000202103	2.57821e-25	Immune-primed
SNRPB2	0.000476082	0.000380265	4.06744e-05	2.96345e-22	6.12119e-05	Immune-primed
UHRF2	0.000475811	1.85403e-05	0.000250062	4.29446e-05	3.17206e-05	Immune-primed
UBE2L3	0.000475469	0.000301065	0.000179165	1.5402e-05	1.55572e-25	Immune-primed
REEP5	0.00047416	0.000213879	0.00015148	2.25887e-06	2.21344e-05	Immune-primed
OSTC	0.00047389	0.000229571	9.37474e-05	3.60763e-12	0.000119602	Immune-primed
PRELID1	0.000473792	0.000200297	4.83496e-05	4.82266e-05	4.21304e-05	Immune-primed
HIGD2A	0.000473532	0.000213814	1.48513e-05	2.35565e-05	7.60608e-05	Immune-primed
RHOC	0.000469027	1.69694e-25	0.000140077	2.04899e-05	0.000246829	Immune-primed
FDFT1	0.000465067	5.35613e-05	0.000226095	0.00012422	0.000218758	Immune-primed
CHMP2A	0.000462472	0.000314439	4.2917e-05	0.000364248	0.000252505	Immune-primed
TALDO1	0.000460436	0.000301189	0.000144919	1.06165e-08	6.3077e-05	Immune-primed
EIF2S3	0.000460035	0.000402543	0.000218836	0.000150354	4.65567e-05	Immune-primed
ERH	0.000459158	0.000340021	3.79407e-05	8.16144e-10	1.55572e-25	Immune-primed
MRPL18	0.000455892	0.00021604	2.2256e-05	0.000152647	0.00012404	Immune-primed
PRELID3B	0.000454072	0.000299164	0.000144967	0.000104015	0.000120947	Immune-primed
CIAO2B	0.000452289	0.000381005	1.05826e-05	4.36584e-25	6.19519e-05	Immune-primed
PTP4A2	0.000452255	0.000306427	0.000260796	0.000148719	0.000389667	Immune-primed
LSM3	0.00044975	0.000358341	3.72206e-06	0.000128267	8.17312e-16	Immune-primed
SPCS1	0.00044679	0.000129491	4.35725e-05	4.08681e-05	0.000209821	Immune-primed
PDLIM1	0.000445532	6.53322e-05	0.000175251	0.000237731	0.000127483	Immune-primed
UFM1	0.000445366	0.000424296	0.000124798	0.000109317	0.000324892	Immune-primed
GSTO1	0.000444747	0.000204117	6.17562e-05	7.76053e-05	0.000133817	Immune-primed
FAM177A1	0.000444281	0.000333315	0.000143175	0.000223739	0.00042304	Immune-primed
PPP1CA	0.000443834	0.000119547	6.59463e-05	0.000116133	9.37771e-05	Immune-primed
RNF7	0.000441947	2.83333e-05	2.83778e-05	4.26954e-05	0.000220866	Immune-primed
TSTD1	0.000437417	0.000352164	7.05546e-06	0.000369225	1.55572e-25	Immune-primed
TMEM54	0.00043727	1.33913e-05	5.81664e-05	0.000266977	0.000141836	Immune-primed
LAD1	0.000437176	0.000264215	0.000109218	1.44858e-05	0.000231699	Immune-primed
PSMB5	0.000436667	0.000187456	5.6104e-05	4.36584e-25	1.93212e-05	Immune-primed
CMPK1	0.000436628	0.000188411	0.000260443	0.000116082	0.000276132	Immune-primed
PGRMC1	0.000435525	0.000255775	4.84993e-05	2.30152e-05	0.000157136	Immune-primed
SUZ12	0.000434184	0.00037939	0.000199219	1.11134e-05	0.000130069	Immune-primed
SEC11A	0.000431051	0.000242713	0.000188117	0.000111322	5.23425e-05	Immune-primed
PSMB9	0.000430748	9.808e-05	0.000137392	9.47814e-06	3.29091e-05	Immune-primed
LAMTOR4	0.00043054	0.000250038	1.32147e-05	0.000294628	0.000406186	Immune-primed
ISG20	0.000429236	1.69694e-25	0.00015472	4.36584e-25	0.000326652	Immune-primed
ARF4	0.000428576	1.69694e-25	0.00019706	0.000190539	0.000320107	Immune-primed
TUFM	0.000428317	0.000279338	8.85758e-05	0.000128096	9.38949e-05	Immune-primed
ATP5PB	0.000428013	0.000288484	6.31556e-05	3.76072e-05	2.09609e-06	Immune-primed
CALM3	0.000426681	0.000327699	7.96085e-05	3.80578e-05	0.000213911	Immune-primed
CDK2AP2	0.000426166	0.000180714	3.0849e-05	0.000201565	0.000169795	Immune-primed
PSMB7	0.00042408	0.000219327	0.000210274	2.05406e-05	0.00011385	Immune-primed
AGPAT2	0.000421015	1.69694e-25	0.000189012	0.000103339	0.000299685	Immune-primed
PDCD10	0.000417422	0.000377654	0.000168026	0.000128182	0.000147227	Immune-primed
SYNGR2	0.000415226	1.69694e-25	0.000182508	2.2658e-05	0.000386588	Immune-primed
ALDH2	0.00041421	8.69669e-05	0.000366503	8.65679e-06	0.000325858	Immune-primed
SIVA1	0.000413617	0.00033533	1.63639e-05	3.0605e-07	6.59823e-07	Immune-primed
SARAF	0.000411536	0.000178112	0.000171424	0.000155904	0.000390769	Immune-primed
TMEM147	0.000411487	0.000129785	7.23925e-05	4.36584e-25	1.84153e-05	Immune-primed
CAP1	0.000410834	0.000182648	0.000194971	6.2686e-09	0.000392465	Immune-primed
TMEM14B	0.000410458	0.000230192	0.000255684	4.36584e-25	1.55572e-25	Immune-primed
PRR13	0.000408892	0.000129919	0.00018164	0.000128534	1.44348e-05	Immune-primed
ILF2	0.000408525	0.00026292	6.61594e-05	4.36584e-25	0.000113249	Immune-primed
CTSH	0.000406012	0.000276364	0.000166683	7.1797e-05	0.000159265	Immune-primed
GHITM	0.000402998	0.000120848	4.65285e-05	5.16078e-05	0.000113925	Immune-primed
VAPA	0.000398661	0.000305863	0.000384327	8.13395e-06	0.000267023	Immune-primed
ETHE1	0.000397883	5.15523e-05	0.000112375	0.000121145	3.77597e-06	Immune-primed
UXT	0.000396054	0.000201549	1.93115e-05	0.000166111	6.43622e-05	Immune-primed
ECH1	0.000394869	0.00031911	6.28872e-05	1.07556e-05	8.5354e-05	Immune-primed
MRPL51	0.000394574	0.000245105	2.22164e-05	0.000160575	6.62767e-05	Immune-primed
TXNL4A	0.00039447	0.000255813	0.000109588	0.000144871	1.17029e-05	Immune-primed
COX20	0.000388375	0.000277376	8.79316e-05	0.000252534	3.15654e-05	Immune-primed
SDF2L1	0.000387812	9.66029e-05	6.36804e-05	0.000126001	0.000184525	Immune-primed
TNFRSF12A	0.000387647	1.69694e-25	0.000132837	4.13406e-05	0.000124164	Immune-primed
FKBP1A	0.000385598	0.000213873	0.00011689	1.73304e-05	0.000138556	Immune-primed
DECR1	0.000384833	0.000244316	0.000158687	0.000105328	1.80939e-09	Immune-primed
ASAH1	0.000383724	2.1821e-05	0.000114661	0.000133018	0.000158803	Immune-primed
BLVRB	0.000382649	1.69694e-25	0.000109955	0.000261414	0.000191531	Immune-primed
AP2S1	0.000382414	0.000114729	6.01221e-05	5.02724e-05	0.000155702	Immune-primed
PSMD4	0.000382131	0.000252501	0.000119742	0.000299231	2.04191e-05	Immune-primed
BSG	0.000377116	4.97946e-07	0.000357449	0.000272559	0.000121503	Immune-primed
SDHB	0.000376575	0.000154194	0.00010652	1.95827e-06	2.94854e-05	Immune-primed
SEC11C	0.000375737	0.000299549	5.10366e-05	0.000209061	0.000246913	Immune-primed
ETFA	0.000374335	0.000274779	0.000345625	4.36584e-25	0.000115651	Immune-primed
UBE2I	0.000372723	0.000278671	0.00017629	3.43256e-05	0.000113189	Immune-primed
UQCRC1	0.000367904	3.71799e-06	8.29045e-05	4.07457e-05	0.000239333	Immune-primed
RWDD1	0.000364788	0.000356784	3.49847e-05	0.000239895	3.00478e-17	Immune-primed
POLR2H	0.00036382	1.59958e-05	0.000132765	3.70306e-05	0.000180121	Immune-primed
PPP4C	0.000363702	0.000133977	6.43693e-05	3.2353e-05	0.000143584	Immune-primed
PGRMC2	0.000363531	0.000258784	0.000109431	8.41748e-05	3.47989e-05	Immune-primed
NANS	0.000361935	0.000184872	8.53935e-05	7.71598e-05	0.000269926	Immune-primed
HACD3	0.000361353	0.000244696	0.000322159	1.5789e-05	7.32242e-05	Immune-primed
CPNE3	0.000361085	0.000239503	9.88555e-05	4.36584e-25	7.49293e-05	Immune-primed
DDOST	0.000360229	0.000181754	0.000109971	7.53731e-06	7.58373e-05	Immune-primed
PLPP2	0.000353345	1.66579e-06	0.000102844	0.000100003	0.000217256	Immune-primed
CSNK2B	0.000352328	0.000245762	3.59845e-05	4.36584e-25	0.000294459	Immune-primed
CUTA	0.000351607	0.000232651	1.30703e-05	1.90094e-05	0.000246045	Immune-primed
YWHAH	0.000351098	0.000125556	5.8144e-05	0.000197954	0.000336526	Immune-primed
MZT2A	0.000350149	0.000321918	6.53807e-05	0.000234564	1.55572e-25	Immune-primed
MISP	0.000347009	7.213e-06	0.000204419	0.00019613	0.00027117	Immune-primed
SPCS3	0.000345783	0.000231349	0.000172364	5.79441e-05	0.000127233	Immune-primed
PPA2	0.000344518	7.72489e-05	0.000298056	4.36584e-25	1.55572e-25	Immune-primed
CAPNS1	0.000344476	0.00027439	7.94246e-05	7.53993e-06	0.000169373	Immune-primed
ANAPC16	0.000342938	0.000274578	0.000249807	0.000292657	0.00017078	Immune-primed
VASP	0.000342416	5.41869e-05	0.000236184	3.04959e-05	0.000331475	Immune-primed
BST2	0.000342078	3.85811e-14	0.000145293	4.36584e-25	0.000197848	Immune-primed
SDF4	0.000341633	0.000317229	9.32527e-05	1.87338e-05	0.000233747	Immune-primed
RER1	0.000339507	0.000107539	0.000138073	7.24395e-05	0.000107518	Immune-primed
ARPC1A	0.000337762	2.26001e-05	0.000267823	4.36584e-25	0.000231887	Immune-primed
LSM4	0.000335349	0.000323562	4.36309e-05	9.43354e-05	4.55307e-05	Immune-primed
FDPS	0.000335244	0.000210014	0.000209188	0.000293983	0.000143078	Immune-primed
LMAN2	0.000333686	8.29011e-05	0.000160689	2.34571e-06	0.000269906	Immune-primed
CD99	0.000332511	2.88795e-05	0.000166952	4.36584e-25	8.06858e-05	Immune-primed
TMED4	0.000331617	0.000232877	7.83864e-05	9.2151e-05	0.000199414	Immune-primed
SRSF9	0.000331181	0.000270113	6.20068e-05	7.56897e-05	0.000102101	Immune-primed
SH3GLB1	0.000328979	0.00018988	0.000222352	0.00015301	0.000242976	Immune-primed
PSMA5	0.000328621	0.000284524	0.000160204	3.92997e-05	3.85021e-05	Immune-primed
ITPA	0.000326778	6.80841e-05	0.000162997	0.000184553	7.1935e-06	Immune-primed
RABAC1	0.000323242	7.03039e-05	0.000106674	0.000314694	0.00023866	Immune-primed
PDCD6	0.000321183	0.000195835	0.000220897	4.11542e-05	0.000140231	Immune-primed
FAM136A	0.000318671	0.000250066	6.09886e-05	5.30457e-05	0.000130709	Immune-primed
FXYD5	0.00031698	8.40396e-17	0.000186514	0.000195392	0.000288915	Immune-primed
IARS2	0.000311038	0.000225308	0.000138795	6.97965e-05	9.35096e-05	Immune-primed
GRSF1	0.000310486	0.000172904	0.000146537	8.71128e-06	5.75573e-05	Immune-primed
CNIH4	0.000305375	0.000195628	0.000106496	4.36584e-25	4.847e-05	Immune-primed
AAMP	0.000304565	0.000113634	5.31062e-05	6.80869e-06	0.000241592	Immune-primed
CISD3	0.00030425	0.00029134	0.000111844	4.81675e-05	7.13344e-06	Immune-primed
SEC13	0.000302957	0.0001451	0.000128298	9.86888e-06	0.000135146	Immune-primed
RPN1	0.000302631	1.55754e-22	0.000189886	0.000105002	0.000302165	Immune-primed
PSMD2	0.000299977	0.000191755	8.62305e-05	5.13854e-05	0.000276705	Immune-primed
TMEM50A	0.000299831	0.000148367	0.000114751	4.24915e-05	0.000265561	Immune-primed
CD81	0.000299541	0.000197503	0.000178091	3.78127e-05	0.000128307	Immune-primed
SRP19	0.00029836	0.000206233	9.23411e-05	3.90685e-19	0.000101401	Immune-primed
GNB2	0.000298047	0.000190629	3.92243e-05	0.000155975	0.000237562	Immune-primed
CNIH1	0.000297062	0.000229623	8.39811e-05	1.42062e-06	4.58496e-05	Immune-primed
LRPAP1	0.000295412	0.000173924	0.000101173	0.000108179	0.000136989	Immune-primed
AHSA1	0.000294863	0.000236206	3.30748e-05	0.000135466	0.000219062	Immune-primed
ADRM1	0.000293904	8.4453e-05	0.000109673	8.89776e-05	0.000133486	Immune-primed
TAP1	0.000293216	3.66721e-06	0.000232545	6.10419e-05	0.000140691	Immune-primed
NDUFV2	0.000291104	3.06626e-05	0.00021326	0.000243288	8.85053e-05	Immune-primed
PKP3	0.000289207	0.000175504	0.00024989	4.36584e-25	0.000210378	Immune-primed
COPB1	0.00028903	0.000262171	0.000287678	0.000120911	0.000244048	Immune-primed
PRMT1	0.000280339	0.000193985	8.99866e-05	4.7632e-05	9.07005e-05	Immune-primed
PPP1R14B	0.000279256	0.000163921	0.000149511	0.000187849	6.80927e-05	Immune-primed
KRTCAP2	0.000275598	0.000142153	0.000218205	0.000170304	5.38537e-16	Immune-primed
TMED3	0.000275176	1.13955e-05	0.000187509	7.18335e-05	0.000191472	Immune-primed
COPE	0.000274407	0.000140729	0.000113135	0.000241074	9.81711e-05	Immune-primed
MAP2K3	0.000268818	3.38493e-05	0.00017895	2.50184e-05	0.000234712	Immune-primed
ZBTB8OS	0.000266082	7.68259e-05	0.000161538	9.65899e-05	8.74669e-05	Immune-primed
LACTB2	0.000265766	0.000199197	0.000133397	0.000209099	1.48158e-05	Immune-primed
NDUFS2	0.000265245	0.000198565	7.10463e-05	0.00016726	0.000151504	Immune-primed
TMEM167A	0.000264333	0.000113762	9.96247e-05	0.000147158	0.000132965	Immune-primed
SUMO1	0.000264033	0.00012769	0.000120454	3.43606e-06	8.42835e-05	Immune-primed
CNPY2	0.000262557	0.000254218	0.000193988	0.000113011	0.000182402	Immune-primed
PLEKHB2	0.000262095	0.000133185	0.000170412	2.9064e-05	9.27857e-05	Immune-primed
PLEK2	0.000261055	6.08896e-05	0.000180786	3.43811e-06	0.000126319	Immune-primed
ATP6V1D	0.000255546	0.000232365	0.000150011	6.30319e-05	9.91849e-05	Immune-primed
COX7A2L	0.000255277	0.000234991	9.13284e-05	1.20619e-05	6.4324e-05	Immune-primed
GLRX3	0.000253397	7.35135e-05	0.000243169	1.11905e-05	0.000113731	Immune-primed
PSMD13	0.000252711	0.000249768	0.000204345	4.36584e-25	0.000113023	Immune-primed
PLIN3	0.000252667	7.23084e-05	0.000130696	1.18684e-05	0.000140869	Immune-primed
SFT2D1	0.000250339	0.00011435	0.000114639	4.19197e-05	9.40903e-05	Immune-primed
TMEM219	0.000246921	7.04532e-05	9.10782e-05	4.35682e-05	0.000209592	Immune-primed
DDRGK1	0.000242908	6.30137e-05	0.000108891	0.000187454	0.000153208	Immune-primed
UBE2N	0.000237859	0.000189698	0.000121383	5.12942e-11	4.85243e-05	Immune-primed
SLC25A39	0.00023752	0.000237207	0.000121256	4.59983e-05	0.000109181	Immune-primed
HEXB	0.000236067	9.2049e-15	0.000168341	4.36584e-25	0.000109299	Immune-primed
STRAP	0.000234728	0.000202107	0.000128939	3.79827e-06	0.00010576	Immune-primed
CEBPG	0.000232732	0.000203217	9.77399e-05	0.000185101	0.00020488	Immune-primed
IL18	0.000232279	1.08953e-05	0.000172008	6.26177e-06	0.000216151	Immune-primed
FBXW5	0.000229976	1.73639e-05	0.000181864	0.000120688	0.000215484	Immune-primed
ATP6AP2	0.000229084	0.000178373	9.44417e-05	5.59809e-11	0.000119642	Immune-primed
NBL1	0.000227195	1.69694e-25	0.000150295	0.000160022	0.000131807	Immune-primed
PPP2CA	0.000223508	0.000107452	0.000204817	4.36584e-25	0.000185919	Immune-primed
CREB3L1	0.000219671	1.69694e-25	0.000188931	1.7473e-05	0.000191011	Immune-primed
RHEB	0.000218083	0.000176988	0.000174351	0.000179924	1.55572e-25	Immune-primed
MFF	0.00021647	0.000186226	0.000205564	2.45713e-05	5.8693e-05	Immune-primed
COPB2	0.000216288	0.000182062	0.000193423	2.41518e-05	0.000169402	Immune-primed
NUCB1	0.00020695	7.58672e-08	0.000173006	6.32203e-06	0.00020222	Immune-primed
PCMT1	0.000190804	0.000185534	0.000145002	3.5467e-05	9.05559e-05	Immune-primed
PSMD11	0.000188201	0.00017863	0.000151762	2.20111e-05	8.78879e-05	Immune-primed
ORMDL1	0.000175099	0.000111375	0.000166167	0.000137395	0.000141558	Immune-primed
ALG5	0.000167385	0.000161696	0.000150698	7.67059e-05	5.08324e-05	Immune-primed
ITGB1	0.000601926	0.000618368	0.000700517	0.000353161	0.000556834	Invasive
GMDS	0.000598904	2.75193e-05	0.00172234	6.97602e-05	0.000208049	Invasive
PPP2R2A	0.000524525	0.000217877	0.000567242	0.000126149	0.00015077	Invasive
ASPH	0.000448721	0.000102658	0.000939928	0.000310995	0.000785376	Invasive
JUP	0.000391537	0.000348941	0.000807271	0.000250766	0.00058704	Invasive
ERO1A	0.000380127	1.69694e-25	0.000506634	0.000100804	0.000308896	Invasive
SP100	0.000349524	0.000356715	0.000668759	8.03491e-05	0.000433764	Invasive
FHL2	0.000348739	1.69694e-25	0.000474901	2.43471e-05	0.000354419	Invasive
HM13	0.000344455	0.000194729	0.000504264	0.000129919	0.000311402	Invasive
CAPZB	0.000343366	0.000332538	0.000502107	1.31265e-05	0.000235559	Invasive
STAT1	0.000334776	0.000332878	0.000556141	4.36584e-25	0.00032012	Invasive
TPD52	0.000327524	0.000190562	0.000768651	0.000500163	0.000222277	Invasive
ITGA2	0.000326	1.69694e-25	0.000816044	3.26129e-06	0.000396902	Invasive
CSNK1A1	0.000323729	0.000331188	0.00080673	0.000166837	0.000266525	Invasive
MGST2	0.000322296	0.00017243	0.000326559	3.45005e-05	2.79123e-06	Invasive
TM9SF2	0.000320607	7.57658e-05	0.000409143	0.000104324	0.000294985	Invasive
ACTR3	0.000316776	0.000369378	0.000428804	8.96404e-05	0.000226938	Invasive
LAMC2	0.000311284	1.69694e-25	0.000540114	9.32686e-10	0.000384944	Invasive
TMEM165	0.000307282	0.000135802	0.000445215	0.000120309	0.000195686	Invasive
PRSS3	0.00030119	0.000378706	0.000403046	0.000275516	6.8633e-05	Invasive
RBCK1	0.000299215	2.13059e-07	0.000373019	4.81164e-05	0.000158402	Invasive
RAB7A	0.000298259	0.000198904	0.000441402	3.59848e-07	0.000243357	Invasive
NT5C3A	0.000297352	0.000310311	0.000355017	8.44356e-05	0.000156925	Invasive
OLA1	0.000296244	0.000411563	0.000442325	4.36584e-25	1.55572e-25	Invasive
JAK2	0.000295941	1.69694e-25	0.000535681	1.01281e-06	6.96634e-12	Invasive
PARD6B	0.000291215	3.31093e-05	0.000448875	3.83789e-05	0.000167243	Invasive
RAB1A	0.000289868	0.000278412	0.000546392	3.22595e-05	0.000405715	Invasive
MAP3K13	0.00028622	0.000164089	0.000490772	0.000157835	0.000245428	Invasive
CTSA	0.00028541	5.75801e-05	0.00031377	7.35634e-05	0.000204129	Invasive
RALA	0.000284043	0.000234303	0.000430655	4.36584e-25	0.000254313	Invasive
YWHAQ	0.00028204	0.000245481	0.000292921	8.21456e-05	3.41741e-05	Invasive
PMEPA1	0.000280984	2.36806e-06	0.000795596	1.22936e-05	0.000421906	Invasive
RAB10	0.00027418	0.000412188	0.000782818	2.55486e-05	0.00020517	Invasive
TMBIM4	0.000272848	6.56989e-07	0.000293099	6.7979e-05	0.000234897	Invasive
PPP1CB	0.000269656	0.000234133	0.000308891	4.28974e-05	0.000305052	Invasive
RAD23B	0.000267658	0.000209718	0.00030413	5.4128e-05	0.000195471	Invasive
RBM47	0.000264881	6.02031e-05	0.000827363	9.73683e-05	0.000450518	Invasive
MBNL1	0.000259937	0.000240123	0.000912539	0.000378921	0.000347491	Invasive
IFNGR1	0.000259722	4.11028e-06	0.000400291	8.74866e-05	0.000108116	Invasive
UBE2D2	0.000259423	0.000150767	0.0004242	0.000100758	6.87371e-05	Invasive
APP	0.000258035	0.000130576	0.000510545	1.78675e-05	0.000380172	Invasive
LSR	0.000256298	2.26344e-13	0.000432579	0.000140831	0.000411072	Invasive
TMOD3	0.000255961	0.000437982	0.000444527	0.000206127	0.000241266	Invasive
RALY	0.000254334	0.000231995	0.000362162	3.43286e-05	0.000175895	Invasive
RTN3	0.000254062	0.000271302	0.000335074	5.87378e-06	0.000217661	Invasive
ANXA3	0.000253085	0.000142067	0.000379351	4.36584e-25	0.000102779	Invasive
KCNK1	0.000249124	1.22908e-07	0.000466046	0.000108619	0.000345612	Invasive
TYMP	0.000248945	1.69694e-25	0.000303074	0.000179173	0.000208331	Invasive
USO1	0.000238889	0.000276788	0.000319252	4.11602e-06	0.000254254	Invasive
ERBB2	0.000238859	1.69694e-25	0.000392591	0.000161226	0.000129662	Invasive
DAP3	0.000237167	0.000242833	0.000289881	9.51684e-05	6.87577e-05	Invasive
NDUFS4	0.000237068	0.000190287	0.00027424	8.45641e-05	2.54361e-05	Invasive
CTNNA1	0.000234013	0.000223256	0.000743198	9.86733e-05	0.000305443	Invasive
UBE2B	0.00023337	0.000224	0.000325679	0.000246237	0.000318172	Invasive
FERMT1	0.000233149	0.000149211	0.000331696	0.000288242	0.000123987	Invasive
FNBP4	0.000232655	0.000286226	0.000637507	0.000615219	0.000542483	Invasive
PFKP	0.000231738	0.000125476	0.000327481	6.77239e-05	5.22042e-05	Invasive
PTBP3	0.000229328	0.000392653	0.000735302	0.000103859	0.00028988	Invasive
PAK1	0.000229199	8.3421e-05	0.000492581	0.000128825	0.000196308	Invasive
PPP2CB	0.000227766	2.45051e-07	0.000298378	0.00020075	0.000203697	Invasive
RNF145	0.0002263	4.25268e-05	0.000499441	0.000232286	0.000361497	Invasive
GNB1	0.000224158	0.000358613	0.000435806	3.54424e-05	0.000214682	Invasive
PPARG	0.000218961	1.69694e-25	0.000829093	0.000446272	1.55572e-25	Invasive
GTF2E2	0.000218686	6.34557e-05	0.000254841	7.61479e-05	8.42215e-06	Invasive
NDUFAF2	0.000216925	0.000185866	0.000252973	0.000240455	1.50162e-05	Invasive
PTPRF	0.000216908	0.000123072	0.000557593	6.76858e-05	0.000393326	Invasive
ATP8B1	0.000214944	0.000202123	0.000680562	0.000395946	0.000358295	Invasive
SUCLG2	0.000213501	0.000287518	0.000494328	2.48097e-05	8.5895e-05	Invasive
OAS1	0.00021334	1.69694e-25	0.000239916	3.3185e-05	0.000101102	Invasive
PARP9	0.000211098	6.60247e-05	0.000302929	5.46486e-06	0.000172799	Invasive
SLC39A14	0.00020983	5.78687e-07	0.000453919	0.000105493	0.00014602	Invasive
ST14	0.000209744	4.78811e-24	0.000382367	0.000161356	0.000220594	Invasive
ZFAND6	0.000209167	0.000146609	0.000505672	0.000160235	6.66477e-05	Invasive
IFNGR2	0.000208996	8.01416e-07	0.000269305	6.87506e-05	0.000157943	Invasive
CAMTA1	0.000208115	0.000216509	0.00023599	4.36584e-25	4.53779e-05	Invasive
FAM120A	0.000206091	0.000424802	0.000517062	0.000109619	0.000373866	Invasive
LARP1B	0.000205183	0.000282944	0.000469268	0.00014074	0.000250827	Invasive
GPBP1	0.000201702	0.000416785	0.000589288	0.000419142	0.000441835	Invasive
GNG12	0.000201168	8.24215e-05	0.000331391	2.49199e-05	0.000159546	Invasive
UQCRC2	0.000200606	0.000168581	0.000223354	0.000151649	0.000179283	Invasive
CAPZA1	0.000200151	0.000191509	0.000413721	0.000114104	8.6369e-05	Invasive
PLSCR1	0.000199542	0.000108206	0.000416174	4.36584e-25	0.000212196	Invasive
PLS1	0.000199387	0.000231178	0.000394329	0.000108008	0.000255746	Invasive
PITPNB	0.000198548	0.000252448	0.000383367	1.1162e-05	6.86077e-05	Invasive
CYB5B	0.000198423	0.000150919	0.000345216	9.44826e-05	6.20657e-05	Invasive
PARP14	0.000197887	9.92538e-05	0.000612578	0.000196573	0.000499787	Invasive
USH1C	0.000197508	0.000130108	0.000363627	0.000147117	0.00013125	Invasive
NDFIP1	0.000196094	2.792e-05	0.000227805	4.36584e-25	0.000198958	Invasive
CAPZA2	0.000194271	0.000178377	0.000253162	7.12028e-05	9.39976e-05	Invasive
DNAJC1	0.000193698	0.000105449	0.000573011	0.000355675	0.000288527	Invasive
CPNE1	0.000192498	0.000218609	0.000256106	0.000233155	7.25157e-05	Invasive
AP2B1	0.000191976	0.000227799	0.000399691	0.000367725	0.00016085	Invasive
HNRNPL	0.000191718	0.000131436	0.000312764	0.000201594	9.17592e-05	Invasive
INTS10	0.000190578	9.84463e-05	0.000218803	5.32211e-05	9.68045e-05	Invasive
CHP1	0.000190263	2.91419e-05	0.000222119	0.000168083	0.000194127	Invasive
FLNA	0.00018988	1.05524e-06	0.000382358	3.78535e-06	4.52017e-05	Invasive
ADAM10	0.000189605	4.91448e-05	0.000540715	0.000337743	0.000158596	Invasive
TFPI	0.000188864	3.44001e-05	0.00027924	7.27007e-05	6.64125e-05	Invasive
NSD3	0.000184979	0.000317334	0.00052871	0.000488803	0.000373735	Invasive
RNF114	0.000184752	0.000140909	0.000262218	0.000189119	0.00014687	Invasive
RBPJ	0.000183194	0.000124941	0.000384928	0.000182202	0.000235571	Invasive
PDCD6IP	0.000182393	0.000242478	0.000434407	5.97587e-05	0.000322231	Invasive
SHROOM3	0.000182161	1.69694e-25	0.000760928	0.000369883	0.000162725	Invasive
ZDHHC3	0.000182138	3.44932e-11	0.00023866	9.96271e-05	0.000111791	Invasive
LIMS1	0.000181243	9.53966e-05	0.000519577	1.27395e-05	5.34857e-05	Invasive
ELF1	0.000180671	0.000274776	0.00073579	2.14499e-05	0.00054963	Invasive
PTPRK	0.00018016	2.58243e-05	0.00139372	0.000392779	0.000166828	Invasive
CDCP1	0.000177333	1.69694e-25	0.000413133	4.36584e-25	0.000192657	Invasive
REEP3	0.000176315	6.13314e-05	0.000346406	2.24584e-05	0.000144306	Invasive
ADAR	0.000175713	0.000183577	0.000349151	0.000260976	0.000274704	Invasive
PRKAR2A	0.000175572	0.000126973	0.000236976	4.14437e-05	4.46583e-05	Invasive
SH3KBP1	0.000175566	0.000135929	0.000316686	3.31753e-13	0.000250819	Invasive
ITPRID2	0.000175359	0.000101903	0.000485735	4.36584e-25	0.000433468	Invasive
HSF1	0.000172967	2.23666e-05	0.000199833	0.000130552	0.000107413	Invasive
SIGIRR	0.000172554	5.45466e-06	0.000214735	1.72199e-05	0.000163316	Invasive
CD47	0.000172133	4.38889e-06	0.000457358	0.000184888	0.000283852	Invasive
LAMA3	0.000171472	2.95101e-05	0.000712809	0.000410954	0.00051485	Invasive
CASP4	0.000171132	0.000142144	0.00017123	1.68219e-05	0.00013253	Invasive
WWP1	0.000170561	9.06084e-05	0.000689822	0.000229419	0.000110722	Invasive
ATF6	0.000170504	0.000265767	0.000410581	4.16129e-05	0.000128304	Invasive
ASS1	0.000169229	9.77752e-05	0.00020057	6.79768e-06	0.000184744	Invasive
WASL	0.000168514	6.98029e-05	0.000226586	0.000106709	0.000212816	Invasive
CDKN2A	0.000164664	0.000106355	0.000277202	0.000115232	0.000189855	Invasive
CALU	0.00016213	0.000191542	0.000258036	4.36584e-25	0.000257731	Invasive
ESRP1	0.000161161	0.000209018	0.000568568	5.92054e-05	0.00014795	Invasive
CLTC	0.00016116	0.000317106	0.000434208	4.25836e-05	0.000403716	Invasive
PSMF1	0.000159521	0.000127473	0.000288223	4.36584e-25	3.46402e-05	Invasive
WWTR1	0.000158396	2.60515e-05	0.000311081	4.36584e-25	6.26027e-05	Invasive
NPEPPS	0.000157957	5.23404e-06	0.000609703	4.32381e-05	0.00030701	Invasive
PPP3CA	0.000157944	0.00022043	0.000788929	2.9818e-05	0.000226212	Invasive
NECTIN2	0.000157641	4.70166e-10	0.000384917	6.81373e-05	0.000261979	Invasive
EFCAB14	0.000157238	0.000136803	0.000207124	8.19637e-05	0.000182308	Invasive
ITGB4	0.000157022	2.67385e-05	0.000596142	9.31739e-05	0.000222611	Invasive
B4GALT1	0.000156215	7.9735e-05	0.000290235	4.36584e-25	0.000127735	Invasive
TNFRSF10B	0.000156148	3.82225e-05	0.00029343	8.18698e-05	0.00014331	Invasive
TCF7L2	0.00015542	1.00921e-07	0.00120137	0.000581116	0.000693695	Invasive
CDC42SE2	0.000154965	4.18198e-05	0.000522277	0.000145911	2.29306e-05	Invasive
ARFGEF1	0.000154633	0.000126449	0.000695132	0.000128702	0.000205302	Invasive
ARHGAP12	0.000154248	0.000201607	0.000787134	0.000248266	0.000157903	Invasive
SURF4	0.000154072	5.63532e-05	0.000217907	3.38284e-05	0.000208911	Invasive
TBRG1	0.000153964	4.79164e-05	0.00021002	8.08846e-05	0.000146704	Invasive
TMEM45B	0.000153297	5.03258e-05	0.000418007	0.000109653	0.000126215	Invasive
SLC2A1	0.000152792	0.00010052	0.000274058	4.36584e-25	0.00018498	Invasive
TSPAN15	0.000152398	3.15431e-05	0.000261791	6.8808e-05	6.56437e-05	Invasive
FLNB	0.000152148	1.69694e-25	0.000942189	7.06287e-05	0.000646231	Invasive
GALNT7	0.000151567	0.000165866	0.000551405	4.92342e-05	0.000352787	Invasive
MTUS1	0.000151104	9.38297e-05	0.000695807	0.000402441	0.000558068	Invasive
SPINT1	0.000150149	1.69694e-25	0.000283354	0.000100988	0.000200906	Invasive
WAC	0.000149357	0.000355117	0.000722517	5.12894e-05	0.000235269	Invasive
DAP	0.000149329	0.000183543	0.000235266	6.47107e-05	0.000154939	Invasive
AGO2	0.000149327	0.00010284	0.000558025	8.0553e-05	0.000203309	Invasive
EPB41L2	0.000148877	0.000262535	0.000572087	0.000298993	0.00015173	Invasive
FNBP1L	0.00014835	0.000315222	0.000643014	3.34827e-05	0.000255344	Invasive
MX1	0.000147466	3.45358e-05	0.000287272	4.36584e-25	0.0002234	Invasive
GLUD1	0.000146638	0.000118668	0.000209905	2.69201e-05	4.60619e-05	Invasive
MIER1	0.000146032	0.00025416	0.00029643	0.000139671	0.000294242	Invasive
CXADR	0.000144172	1.87136e-06	0.000325547	5.927e-05	0.000297688	Invasive
LSM14A	0.000143989	0.000232957	0.000464713	4.36584e-25	0.0001036	Invasive
RSRC1	0.000142724	0.000337576	0.000475151	0.000190565	0.000290578	Invasive
PTCD3	0.000142639	0.000193109	0.000253189	0.000247147	7.706e-05	Invasive
SERINC3	0.000142402	0.000276402	0.000295495	0.000142029	0.000256222	Invasive
ARFIP1	0.000142385	8.70408e-05	0.000346798	5.90307e-05	2.36312e-05	Invasive
SCARB2	0.000142288	8.36455e-05	0.000314841	5.37529e-05	0.000123542	Invasive
TPD52L2	0.000141461	2.81756e-06	0.000323297	3.76107e-06	9.66415e-05	Invasive
PCGF5	0.000141249	6.06284e-05	0.000277757	8.64318e-05	5.67268e-05	Invasive
ERBB3	0.000140999	4.78718e-23	0.000566774	0.000202499	0.000427674	Invasive
DAZAP1	0.000140995	0.000201952	0.000243642	0.000151748	0.000160253	Invasive
MAX	0.000140522	7.57183e-05	0.000296804	5.09276e-06	5.14665e-05	Invasive
TAF2	0.00014052	1.71523e-05	0.000373623	0.000131273	6.27622e-05	Invasive
JAG1	0.000139734	1.02602e-23	0.000338434	0.000190362	9.22347e-05	Invasive
KPNA4	0.000138916	0.000208933	0.000355242	8.98424e-05	0.000271249	Invasive
OSBPL8	0.000138536	0.000301227	0.000451381	4.36584e-25	0.000159635	Invasive
RAP1A	0.000137778	0.000189235	0.000406393	4.36584e-25	0.000147566	Invasive
FNTA	0.000137575	0.000134623	0.00018293	6.01105e-05	8.31309e-05	Invasive
UBE2E3	0.000137514	6.12936e-05	0.000359329	2.59059e-05	7.00987e-05	Invasive
KDM4C	0.000136687	1.69694e-25	0.000607352	1.77321e-05	1.79378e-06	Invasive
SLC30A9	0.00013632	7.40321e-05	0.000285651	2.67636e-05	8.17189e-05	Invasive
MAP3K20	0.000135891	0.00017472	0.000330767	4.36584e-25	2.94767e-05	Invasive
ERP44	0.000135874	9.26989e-05	0.000343252	3.15439e-05	0.000138854	Invasive
PAFAH1B1	0.00013487	0.000236208	0.000596451	0.000101531	0.000234657	Invasive
PTPN1	0.000133948	0.000246829	0.000271253	3.88722e-05	0.000152488	Invasive
FEZ2	0.000133817	0.000123689	0.00027233	1.27341e-05	0.000133593	Invasive
P4HA1	0.000133663	0.000200193	0.00023797	0.000170643	4.29832e-05	Invasive
EFR3A	0.000133582	2.10875e-05	0.000369796	1.17855e-05	8.61656e-05	Invasive
UBE2G2	0.000129918	0.000169789	0.000276586	1.46055e-05	0.000169448	Invasive
CNOT2	0.000129501	0.000165493	0.000532789	9.21606e-05	0.000192016	Invasive
ZMYND8	0.000129382	0.000207451	0.000825479	1.77963e-06	0.000677822	Invasive
PPP4R3B	0.000129211	0.000336876	0.000424307	0.000165918	0.000199766	Invasive
SNRNP70	0.0001287	0.000163727	0.0005032	0.000222431	0.000486147	Invasive
RAP1B	0.000128149	0.000129947	0.00063666	0.000143319	0.000151219	Invasive
SLC44A1	0.00012814	0.000148301	0.000491394	9.99163e-05	0.000236717	Invasive
RAB22A	0.000128047	0.000198258	0.000447733	0.000106599	5.63301e-05	Invasive
PDS5A	0.000127991	0.000214307	0.000496774	7.23821e-05	0.000182352	Invasive
ABI1	0.000127888	0.000170852	0.000516634	0.000210186	0.000189876	Invasive
NDFIP2	0.000127769	3.46969e-05	0.000296531	7.47082e-05	7.99783e-05	Invasive
PPP2R5A	0.000127671	0.000135077	0.00028069	1.52436e-05	8.34252e-05	Invasive
TSG101	0.000127241	0.000164601	0.000230672	7.9948e-05	0.000130776	Invasive
POLD4	0.000127188	1.69694e-25	0.000218289	1.60531e-05	0.000189755	Invasive
TBL1XR1	0.0001269	0.000382678	0.000812	0.000212058	0.000123822	Invasive
CRLS1	0.000126453	0.000100464	0.000228786	6.98495e-06	5.45345e-05	Invasive
TNIP1	0.000125575	6.61488e-05	0.00028306	5.90595e-05	0.000245209	Invasive
PTPRR	0.00012556	1.13627e-07	0.00039993	2.81718e-08	5.6622e-06	Invasive
STK3	0.000125378	0.000219351	0.000810625	6.28013e-05	4.85739e-05	Invasive
C1GALT1	0.000124186	0.000136009	0.00050152	4.31509e-05	0.000226996	Invasive
MYOF	0.000124024	1.69694e-25	0.000675043	1.15572e-05	0.000298663	Invasive
RHPN2	0.000123801	6.6487e-05	0.000674275	4.36584e-25	0.000205681	Invasive
ACBD6	0.000123725	0.000277995	0.00040875	0.000164122	4.16134e-05	Invasive
CCNC	0.000123084	5.1715e-05	0.000203558	3.01711e-05	0.000102989	Invasive
TAOK3	0.000123061	0.000153967	0.000758581	0.000290941	0.0003625	Invasive
DHX15	0.000123056	0.000219581	0.000372666	0.000298655	0.000268632	Invasive
HACD2	0.000122479	0.000166859	0.000241573	4.80907e-06	7.93053e-06	Invasive
MPZL1	0.000122179	8.07338e-05	0.000336113	2.23863e-05	8.60395e-05	Invasive
STXBP5	0.00012136	3.53218e-05	0.000438766	4.4572e-06	9.56399e-05	Invasive
NUP50	0.000121305	6.20247e-05	0.00022121	4.81736e-05	0.00014028	Invasive
TNFRSF21	0.000121273	1.69694e-25	0.000400753	4.36584e-25	0.000168885	Invasive
UBE2H	0.000120042	0.0003465	0.000683675	7.24423e-05	0.000120933	Invasive
PARP4	0.000119995	0.000378604	0.000649515	8.34158e-05	0.000179921	Invasive
ABLIM1	0.000119839	0.000105808	0.000858916	7.20356e-05	0.000847673	Invasive
AGPAT5	0.000119103	0.000231154	0.000306477	3.93465e-05	2.81876e-08	Invasive
STK24	0.000117428	0.000113958	0.000617359	0.000215395	0.000194293	Invasive
PDLIM5	0.000116698	1.98545e-05	0.000708911	0.000125	0.000313106	Invasive
MAP4	0.000116629	0.00031637	0.00061779	0.000112216	0.000164309	Invasive
FAM114A1	0.000116515	1.69694e-25	0.000227322	1.27932e-05	0.000205082	Invasive
FAM83H	0.000116423	8.05692e-06	0.000272913	7.1255e-05	4.98365e-05	Invasive
CBFB	0.000116142	2.10158e-05	0.000321823	6.16308e-06	6.40387e-05	Invasive
FIP1L1	0.000114825	0.000165392	0.000209633	1.10438e-05	9.13867e-05	Invasive
HSD17B4	0.000114768	7.71208e-05	0.000218418	0.000147967	4.54247e-05	Invasive
ELOVL6	0.00011453	0.000129703	0.000310383	4.36584e-25	1.80354e-05	Invasive
MGLL	0.000114453	1.35905e-06	0.000416336	9.45098e-05	0.000320671	Invasive
PPP2R5E	0.00011311	0.000321539	0.000436854	4.36584e-25	0.000139984	Invasive
MCPH1	0.000112593	6.02221e-05	0.000484158	7.34647e-05	1.55572e-25	Invasive
CLCN3	0.00011254	0.000160544	0.000279349	0.000130879	0.000132122	Invasive
FAF2	0.000112506	2.52856e-05	0.000232713	2.48051e-20	0.000154583	Invasive
CYFIP1	0.000112401	4.5725e-05	0.000328006	1.75191e-05	0.000146645	Invasive
MAGT1	0.000111656	3.77633e-05	0.000231338	3.71521e-06	0.000155672	Invasive
DDAH1	0.000110859	5.60026e-06	0.000419178	1.22784e-05	8.6388e-05	Invasive
DDX6	0.000110727	0.000183841	0.000276249	0.000109095	0.000180331	Invasive
ENC1	0.000110634	0.000131634	0.000270211	0.000244832	0.000137247	Invasive
VEZT	0.000110479	8.71295e-05	0.000388616	8.67626e-05	0.00014518	Invasive
LASP1	0.000109975	0.000171995	0.000503944	2.53348e-05	0.000324784	Invasive
GTF2I	0.000109805	0.000296199	0.000746938	0.00049504	9.56343e-05	Invasive
SLC35A3	0.000109681	2.44792e-05	0.000399706	0.000150819	0.000234475	Invasive
MAPK1IP1L	0.000109481	0.000130638	0.000223263	7.62956e-05	0.000186963	Invasive
OXR1	0.000109441	2.50005e-05	0.00059684	9.71732e-05	9.52087e-05	Invasive
ADIPOR2	0.000108591	2.09001e-05	0.000437238	2.53252e-05	0.000145507	Invasive
CLSTN1	0.000108329	5.60812e-05	0.000305167	3.69052e-06	0.000186685	Invasive
CDC73	0.000108077	0.000151012	0.000377378	4.36584e-25	0.000145048	Invasive
TGIF1	0.000107734	1.72728e-05	0.000239827	0.000201442	0.00014612	Invasive
ARIH2	0.000107502	0.000155	0.000236904	5.99268e-05	0.00011747	Invasive
BCL2L1	0.000107392	4.45056e-05	0.000506328	4.36584e-25	0.000160029	Invasive
LRRFIP2	0.000107314	8.54539e-05	0.000397346	0.00019413	0.000105923	Invasive
TRAK1	0.0001073	1.81785e-25	0.000512479	0.000182053	0.000270691	Invasive
LYN	0.000107177	0.000136959	0.000311027	5.32311e-05	2.81737e-05	Invasive
ATXN10	0.000106902	7.95787e-05	0.000285092	5.98225e-06	3.38493e-05	Invasive
BLCAP	0.000106704	7.99989e-05	0.000314553	0.000138519	0.000177863	Invasive
ZCCHC7	0.000105881	0.000296234	0.000705052	0.000110031	4.59994e-05	Invasive
TRIM25	0.000104942	2.39008e-05	0.000320263	2.09957e-05	0.000159886	Invasive
RSU1	0.000104804	0.000185462	0.000289386	4.36584e-25	5.02579e-06	Invasive
EIF2AK2	0.000103857	0.000344897	0.000444301	0.000173153	0.000231643	Invasive
SMAP1	0.000103603	0.000227936	0.000425789	2.69789e-05	0.000104226	Invasive
PPP1R12A	0.000103047	0.000390218	0.000594888	0.00010822	0.000516789	Invasive
KIF2A	0.000102998	0.000222316	0.000369071	1.47907e-05	3.15593e-05	Invasive
SUCO	0.000102908	0.000163549	0.000270887	6.5427e-05	0.000192088	Invasive
CSNK1E	0.00010236	6.42432e-05	0.000251496	2.88128e-05	9.59683e-05	Invasive
GSDMB	0.000101494	1.69694e-25	0.00046152	0.000196891	0.000154108	Invasive
DNM1L	9.96762e-05	0.000124408	0.00031097	0.000212878	0.000150504	Invasive
CDK12	9.89554e-05	0.00031865	0.000514222	0.00041002	0.000217965	Invasive
TLK1	9.88153e-05	0.000268733	0.000542435	6.31368e-05	8.87284e-05	Invasive
DCAF6	9.88105e-05	7.28826e-05	0.000467584	3.38825e-05	0.000143046	Invasive
VCL	9.85561e-05	0.0003216	0.000328498	5.04059e-05	0.000122377	Invasive
BRI3BP	9.79855e-05	0.000120355	0.000186677	9.78143e-05	0.000146429	Invasive
STX7	9.78026e-05	7.43935e-05	0.000371515	0.000355583	0.00015814	Invasive
MECOM	9.77315e-05	9.12056e-05	0.00137519	0.000143879	0.000413612	Invasive
FAM91A1	9.76125e-05	0.000178035	0.000272178	0.00010607	0.000193765	Invasive
GNPAT	9.72184e-05	0.000156465	0.000173263	9.30967e-05	0.000158346	Invasive
TMEM248	9.68529e-05	0.0001111	0.000251567	9.14334e-07	0.000173463	Invasive
CDH17	9.64258e-05	0.00033956	0.000508304	0.00030505	0.000341384	Invasive
UBE2R2	9.6413e-05	0.000325098	0.000446291	4.36584e-25	7.13808e-05	Invasive
NOL10	9.58544e-05	0.000123689	0.000358736	4.36584e-25	3.69536e-05	Invasive
GOLPH3	9.57097e-05	0.000103613	0.0003868	4.36584e-25	0.00018992	Invasive
PRKRIP1	9.536e-05	0.000186696	0.000259549	7.16196e-05	3.62296e-05	Invasive
RASSF7	9.51827e-05	7.47842e-08	0.000290925	4.97665e-05	0.000234657	Invasive
ITCH	9.48012e-05	0.000109338	0.000688691	0.000125306	8.9992e-05	Invasive
SERINC2	9.47168e-05	7.66538e-05	0.000306855	0.000149434	0.000204379	Invasive
TMEM87A	9.3937e-05	0.000261847	0.000422642	0.000183515	0.000189978	Invasive
RAB6A	9.38315e-05	0.000136191	0.000476776	0.000103848	0.000109113	Invasive
DGKD	9.365e-05	7.19684e-08	0.00058519	4.36584e-25	0.000244018	Invasive
UBE2E1	9.35878e-05	0.000118219	0.000379439	8.03458e-06	2.71522e-05	Invasive
WDR33	9.34066e-05	0.000145397	0.000361977	0.000141161	0.000134568	Invasive
KPNA1	9.33909e-05	6.0803e-05	0.000255287	7.88633e-05	8.53378e-05	Invasive
MAP7	9.32356e-05	0.000588027	0.000757782	0.000157385	0.000264715	Invasive
KCMF1	9.30553e-05	1.7743e-05	0.00037775	3.89725e-05	0.000171365	Invasive
SH3RF1	9.3033e-05	2.76387e-05	0.000826824	7.49856e-06	0.000104162	Invasive
FUBP3	9.2437e-05	6.95256e-05	0.000264487	4.36584e-25	7.59936e-05	Invasive
NAPG	9.21556e-05	0.000114247	0.00023635	6.61653e-05	0.000187074	Invasive
MTF2	9.16522e-05	0.000185782	0.000294154	5.60058e-05	0.000144207	Invasive
KIF13B	9.13937e-05	0.000115739	0.000679124	0.000141603	0.000468587	Invasive
SUPT20H	9.11096e-05	7.46121e-05	0.000356772	4.36584e-25	9.3335e-05	Invasive
NFKB1	9.10866e-05	6.62645e-05	0.000313224	6.26914e-05	8.85695e-05	Invasive
NT5DC1	9.10424e-05	0.000185606	0.000328383	3.9501e-05	5.34744e-05	Invasive
SLC16A1	9.07357e-05	0.000125331	0.00018591	0.000165646	0.000101944	Invasive
TMEM63A	9.04488e-05	7.37854e-06	0.000456322	0.000258097	0.000273476	Invasive
TJP1	9.02757e-05	3.24219e-05	0.000650249	0.000214795	0.00029967	Invasive
ANKLE2	8.97765e-05	0.000114177	0.00035821	0.000349922	0.000331175	Invasive
TANK	8.92036e-05	0.000116258	0.000390135	6.35266e-05	0.00018288	Invasive
ASAP2	8.90176e-05	1.23018e-05	0.000896569	0.000128512	0.000331836	Invasive
HDHD3	8.89783e-05	5.93379e-07	0.000306687	0.000262844	0.000130192	Invasive
AKAP13	8.87232e-05	3.93743e-05	0.00123179	0.000953559	0.000928	Invasive
SULF2	8.84164e-05	7.56837e-05	0.000388912	0.000114119	0.000111202	Invasive
MSI2	8.83235e-05	0.00018424	0.000746091	0.000197297	0.000164896	Invasive
SIL1	8.82238e-05	6.12723e-06	0.000430659	3.39472e-05	6.80286e-05	Invasive
GPBP1L1	8.82059e-05	1.77916e-05	0.000488846	0.000224499	0.00014637	Invasive
TNPO1	8.80282e-05	0.000101738	0.000412628	8.54003e-06	8.48706e-05	Invasive
RNF13	8.7918e-05	5.38428e-05	0.000337519	3.79428e-05	3.43727e-05	Invasive
AIG1	8.78301e-05	5.60701e-05	0.000302952	4.20186e-05	6.15761e-05	Invasive
ROCK2	8.77021e-05	0.00066261	0.000795532	1.83995e-05	0.000775264	Invasive
WAPL	8.7578e-05	0.000330957	0.000423721	0.000185279	0.000112607	Invasive
MTAP	8.7075e-05	0.000114632	0.000544017	4.36584e-25	1.55572e-25	Invasive
CCDC6	8.70535e-05	0.000320757	0.00032517	0.000208223	0.000122658	Invasive
RCOR1	8.66529e-05	8.04959e-05	0.000526343	1.65992e-15	0.000218949	Invasive
OSBPL2	8.60729e-05	7.32841e-05	0.000347889	3.23945e-05	0.000347421	Invasive
CDH1	8.59362e-05	0.000224218	0.000589211	6.40722e-05	0.000327699	Invasive
ERBIN	8.58633e-05	8.31998e-05	0.000808074	9.21078e-05	0.000157555	Invasive
FBXO9	8.56074e-05	0.00021611	0.000273907	8.06382e-05	0.000165096	Invasive
CYP2S1	8.55583e-05	2.22591e-19	0.000271671	4.30948e-05	0.000129617	Invasive
BLZF1	8.54786e-05	6.46046e-05	0.00020945	3.92691e-05	0.000171788	Invasive
GFPT1	8.54456e-05	0.000156829	0.00060426	2.11655e-05	0.000575909	Invasive
USP9X	8.52699e-05	0.000137504	0.0004842	1.23141e-05	0.000124753	Invasive
MARK2	8.51489e-05	1.08629e-05	0.000309549	2.41632e-05	0.000119365	Invasive
ITGAV	8.50802e-05	1.69694e-25	0.000491218	4.36584e-25	0.000141662	Invasive
RABGAP1L	8.50081e-05	0.000178416	0.00111815	0.000177588	6.02115e-05	Invasive
UBE3A	8.48433e-05	0.000338932	0.000379086	0.000172039	0.000253067	Invasive
ADD3	8.48201e-05	0.000440878	0.00061657	0.000382532	0.000517711	Invasive
SLMAP	8.47341e-05	8.45349e-05	0.000693412	4.70644e-05	0.000320696	Invasive
SEC61A1	8.45466e-05	4.3361e-05	0.000250137	5.2477e-05	0.000226155	Invasive
CDC27	8.39843e-05	9.94712e-05	0.000290394	4.36584e-25	4.07339e-05	Invasive
SP110	8.39129e-05	0.000126793	0.00024463	1.33419e-05	0.000177946	Invasive
MICU1	8.38896e-05	0.000163737	0.000655376	0.00014908	5.34178e-05	Invasive
GRB7	8.35245e-05	1.69694e-25	0.000376391	4.35649e-05	9.5896e-05	Invasive
RNF149	8.28583e-05	1.56883e-05	0.000536931	5.85063e-05	0.00024306	Invasive
HIBADH	8.28107e-05	5.49685e-05	0.000359577	5.55222e-05	9.75166e-06	Invasive
CNOT1	8.2278e-05	0.000103186	0.000368008	0.000356885	0.000213889	Invasive
GNAI3	8.22323e-05	0.000119597	0.000185746	0.00013243	0.000178599	Invasive
FGD4	8.22141e-05	1.94247e-09	0.00108548	0.000263131	0.00010701	Invasive
CTSZ	8.21597e-05	4.38601e-05	0.000317492	0.000124722	0.00014785	Invasive
TMC4	8.19791e-05	1.99504e-24	0.000260948	7.17869e-05	0.000198394	Invasive
LRPPRC	8.09613e-05	0.000340035	0.000437477	0.000175115	0.000107033	Invasive
TMEM106B	8.08386e-05	5.90581e-05	0.000208822	6.38024e-06	0.000189779	Invasive
VGLL4	8.07539e-05	4.38201e-05	0.000415462	9.65085e-05	1.72471e-05	Invasive
AGPS	8.07168e-05	5.11653e-05	0.000301615	4.7183e-05	7.93617e-05	Invasive
HKDC1	8.05377e-05	2.81222e-22	0.000386821	0.000245562	6.7877e-05	Invasive
NBR1	8.04797e-05	0.000193201	0.000214614	6.99232e-05	0.000197066	Invasive
PAXBP1	8.03747e-05	0.000267361	0.000337619	0.000257069	0.00025373	Invasive
LUC7L2	8.02701e-05	0.000234354	0.000343909	7.41151e-07	3.70446e-06	Invasive
MAP3K2	8.01477e-05	0.000126691	0.000404183	8.91394e-05	0.000254218	Invasive
STAU2	7.99444e-05	9.66788e-05	0.000441765	0.000113202	3.64641e-05	Invasive
JAK1	7.98218e-05	0.000437665	0.000520742	0.000136676	0.000409906	Invasive
MYO5C	7.96237e-05	1.4269e-05	0.00047202	4.94156e-05	0.000276558	Invasive
PKP2	7.88296e-05	0.000166227	0.000398044	1.94508e-05	6.00325e-05	Invasive
FOXN2	7.88001e-05	3.10536e-05	0.00034395	2.99547e-05	3.23546e-05	Invasive
STT3B	7.8708e-05	0.000199661	0.000239694	0.000121388	0.000178346	Invasive
CHPT1	7.84213e-05	3.18671e-05	0.000326929	3.44903e-05	0.000114492	Invasive
GATAD2A	7.83856e-05	0.00011967	0.000435125	0.000152646	6.97303e-05	Invasive
CELF1	7.83744e-05	6.16901e-05	0.000604224	0.000131646	0.000148975	Invasive
DDX39B	7.81085e-05	6.93877e-05	0.000428337	0.000174393	2.94981e-05	Invasive
PIAS1	7.80572e-05	3.24071e-05	0.000739449	0.000106821	6.52334e-05	Invasive
TARDBP	7.7353e-05	0.000173523	0.000174806	7.43379e-05	0.000133451	Invasive
LARP1	7.72808e-05	0.000209743	0.000476062	0.00016752	0.000184721	Invasive
PTEN	7.68964e-05	0.00013351	0.000552171	0.00019379	5.11571e-05	Invasive
ASCC3	7.68943e-05	0.000218219	0.000634291	0.000224457	0.000101946	Invasive
ZMYND11	7.6677e-05	7.87132e-05	0.000270563	4.36584e-25	0.000100937	Invasive
CTNND1	7.62332e-05	3.03717e-05	0.00110718	0.000982657	0.000780225	Invasive
AP3B1	7.60767e-05	0.000216159	0.000594726	2.32817e-05	0.000234496	Invasive
RNF19A	7.60688e-05	0.000114823	0.000536765	0.00036038	0.000347571	Invasive
SNX9	7.59893e-05	0.0001412	0.000547604	6.10452e-05	0.000318251	Invasive
VPS41	7.57872e-05	0.000103089	0.000294686	1.06614e-05	6.86956e-05	Invasive
ELF2	7.55849e-05	5.78789e-05	0.000574066	5.9279e-05	8.63205e-05	Invasive
PIK3C2G	7.52769e-05	1.69694e-25	0.000775941	0.000532527	1.55572e-25	Invasive
STX8	7.51345e-05	2.02845e-05	0.00038362	4.36584e-25	4.21621e-05	Invasive
ECHDC2	7.49518e-05	1.16766e-21	0.000289384	0.000212596	0.000198321	Invasive
CD58	7.48862e-05	1.10006e-05	0.000325526	0.000121011	7.17237e-05	Invasive
GIGYF2	7.48538e-05	0.000315755	0.000464288	4.36584e-25	0.000387195	Invasive
ALG13	7.47074e-05	0.000222646	0.000353998	0.000135354	5.6371e-05	Invasive
SLC12A7	7.46945e-05	2.04355e-05	0.00032919	3.72859e-05	0.000216234	Invasive
ORC2	7.45574e-05	0.000186721	0.000373637	6.96444e-05	6.93549e-05	Invasive
BTBD10	7.42947e-05	5.33588e-05	0.000329424	1.30553e-05	2.36624e-05	Invasive
TUT4	7.42795e-05	0.000188376	0.000250034	0.000203332	8.60299e-05	Invasive
CLIP1	7.40786e-05	0.000115604	0.000469569	1.685e-05	0.000417803	Invasive
ACSL5	7.39061e-05	1.69694e-25	0.000361636	4.82372e-05	0.000167577	Invasive
PARN	7.38225e-05	0.000167701	0.000230489	1.29247e-05	6.11869e-05	Invasive
ARHGAP21	7.38048e-05	0.000116745	0.000745975	0.000385296	0.000279772	Invasive
GOSR1	7.37111e-05	0.000135653	0.000225525	5.42162e-05	8.67391e-05	Invasive
UBA6	7.3673e-05	0.000114	0.000541415	8.42529e-05	0.000149619	Invasive
PSPC1	7.36494e-05	0.00024971	0.000406072	4.64867e-06	0.000106005	Invasive
GLYR1	7.3468e-05	7.64749e-05	0.000257433	2.70261e-05	0.000177998	Invasive
SLC37A1	7.34259e-05	1.69694e-25	0.000405077	7.28046e-11	3.36222e-05	Invasive
TRIM27	7.32885e-05	0.000165039	0.000215206	4.32041e-05	0.000158358	Invasive
CUL4A	7.32485e-05	0.000190808	0.000355069	6.36504e-05	0.00016324	Invasive
MYEOV	7.3076e-05	3.12417e-05	0.000460708	0.000158577	1.55572e-25	Invasive
MTX2	7.29672e-05	0.000114369	0.000257303	2.34867e-05	3.86321e-05	Invasive
ATP6V1H	7.29651e-05	8.78889e-05	0.000307735	7.9926e-05	2.4401e-05	Invasive
EPAS1	7.29604e-05	3.99571e-06	0.000273766	0.000219874	0.00012184	Invasive
WWC1	7.28486e-05	7.0615e-05	0.000584351	4.36584e-25	6.17941e-05	Invasive
LPIN1	7.26374e-05	0.000215725	0.000267748	9.97366e-05	0.000246209	Invasive
OXSR1	7.26282e-05	6.72336e-05	0.000418633	0.000291012	0.000162944	Invasive
USP3	7.22722e-05	0.000241698	0.0005192	0.000260426	0.000118808	Invasive
OSBPL3	7.1881e-05	5.7705e-06	0.000437779	7.71676e-05	0.000339617	Invasive
AFTPH	7.14997e-05	9.10837e-05	0.000406849	3.55794e-05	0.000293616	Invasive
GIPC1	7.14561e-05	5.20694e-05	0.000253763	0.000221063	0.000147447	Invasive
HIF1A	7.12228e-05	0.000264505	0.00038509	0.000100478	0.000357172	Invasive
SEL1L3	7.10918e-05	8.93074e-05	0.000585397	5.34286e-05	0.000149881	Invasive
INAVA	7.10736e-05	2.83067e-06	0.000336031	0.000169066	1.15824e-06	Invasive
MYO5B	7.09736e-05	3.95315e-05	0.000531221	0.000307535	8.94565e-05	Invasive
MED15	7.07157e-05	9.95361e-05	0.000437413	4.8127e-05	0.000184456	Invasive
RAB5A	7.05184e-05	0.000157303	0.000239006	0.000122075	0.000225318	Invasive
AGFG1	7.03301e-05	3.04718e-05	0.000557263	9.47886e-05	0.000176384	Invasive
MYH9	7.01181e-05	0.000258572	0.000483953	0.00020099	0.000399446	Invasive
ANKRD17	6.99869e-05	0.000239483	0.000854615	0.000103	0.000179966	Invasive
FBXO34	6.99712e-05	4.72344e-05	0.000481064	0.000401355	7.47495e-05	Invasive
MAPK1	6.9952e-05	7.60211e-05	0.000283631	3.07902e-05	0.00011649	Invasive
YAF2	6.9838e-05	0.000113854	0.000249073	5.91533e-05	3.75187e-05	Invasive
SCFD1	6.9661e-05	0.000134158	0.00045936	7.95427e-05	0.000132152	Invasive
NFIB	6.95492e-05	0.000106878	0.000558931	8.01868e-05	0.000237214	Invasive
ZNF148	6.94309e-05	0.000228339	0.000448988	4.06843e-05	0.000113319	Invasive
SEMA4B	6.92911e-05	2.43555e-15	0.000563447	4.53392e-05	0.000263973	Invasive
CCDC93	6.92298e-05	0.00014254	0.000264523	8.47319e-05	9.7892e-05	Invasive
ACTN1	6.91537e-05	0.000269938	0.000424333	4.36584e-25	0.000269969	Invasive
CWC27	6.91445e-05	0.000210476	0.000292451	1.83019e-05	3.51559e-05	Invasive
PAWR	6.88861e-05	0.000365043	0.000495522	0.000415293	0.000209884	Invasive
UBAP1	6.86632e-05	0.000203742	0.00032003	6.98602e-05	0.000125	Invasive
IQGAP2	6.85314e-05	0.000324879	0.00049699	9.89982e-05	0.00034863	Invasive
STK39	6.84828e-05	0.000217875	0.000745267	4.30796e-05	1.68467e-05	Invasive
ATAD1	6.84713e-05	3.97116e-05	0.00027736	5.99332e-05	0.000159339	Invasive
ITSN1	6.81358e-05	0.000148696	0.000439905	1.63609e-05	0.000202722	Invasive
ZNF451	6.81253e-05	2.37892e-05	0.000352505	0.000130817	0.000176127	Invasive
PHF20	6.80925e-05	0.000150466	0.000385493	0.000127382	0.000113902	Invasive
FBXW11	6.78493e-05	3.92071e-05	0.000505337	0.000222248	5.446e-05	Invasive
KDM5A	6.77501e-05	0.000133541	0.000406512	0.000134047	0.000383263	Invasive
XPO1	6.77042e-05	0.000364475	0.000615437	0.000191137	0.000246066	Invasive
PCMTD1	6.73049e-05	0.000135457	0.000405526	0.000282678	0.000252021	Invasive
NEDD4L	6.71398e-05	5.19332e-06	0.00083229	0.000398522	0.000226922	Invasive
ATP13A3	6.70931e-05	2.6589e-05	0.000395881	6.24261e-05	0.000204044	Invasive
RB1	6.69215e-05	0.000150498	0.000430048	0.000130257	5.41183e-05	Invasive
DCAF5	6.68694e-05	8.46104e-05	0.000343204	7.17135e-08	0.000161214	Invasive
CASK	6.68607e-05	0.000120317	0.000710179	0.000114735	5.61911e-05	Invasive
ZDHHC20	6.66943e-05	9.40004e-05	0.000553483	0.000122584	0.000129751	Invasive
UBAC2	6.61804e-05	0.000135521	0.000476836	2.163e-05	1.27979e-05	Invasive
NCKAP1	6.59532e-05	0.000182399	0.000515882	0.000103766	0.000230087	Invasive
SPIDR	6.58333e-05	1.04994e-07	0.000895431	0.00017765	3.0696e-13	Invasive
MAPKAP1	6.58248e-05	0.000297216	0.000451433	8.90305e-05	4.47104e-05	Invasive
PTK2	6.51776e-05	9.48557e-05	0.00117172	9.98927e-05	6.50055e-05	Invasive
ABHD17C	6.50487e-05	1.69694e-25	0.000419372	3.37376e-05	0.000208368	Invasive
COBL	6.48947e-05	0.000178223	0.000601908	0.000179696	8.30647e-05	Invasive
NR2C1	6.41711e-05	4.67687e-05	0.000283267	0.000168283	9.23276e-05	Invasive
IBTK	6.41696e-05	0.000274088	0.000562989	2.46648e-05	0.0002724	Invasive
UBE2G1	6.37716e-05	7.41341e-05	0.00031972	6.70261e-22	1.20065e-05	Invasive
PIP5K1B	6.35425e-05	5.47901e-06	0.000738711	3.38046e-05	8.54899e-05	Invasive
LYST	6.33063e-05	1.64763e-13	0.000617902	4.5717e-05	6.86352e-05	Invasive
UBE2W	6.31521e-05	4.65822e-10	0.000340511	4.36584e-25	6.39393e-06	Invasive
ADK	6.27734e-05	0.000143128	0.000661559	4.39153e-05	4.3936e-06	Invasive
WNK1	6.27144e-05	8.26075e-05	0.000516268	0.000188891	0.000149519	Invasive
CPSF6	6.24678e-05	3.20451e-05	0.000361163	0.000130865	9.33701e-05	Invasive
RALGPS2	6.22466e-05	0.000130996	0.000709676	0.000381998	7.38039e-05	Invasive
CAND1	6.21772e-05	9.10895e-05	0.000264646	0.000132601	0.000123719	Invasive
FMR1	6.21382e-05	0.000139223	0.000250379	6.31612e-06	0.000193052	Invasive
YTHDF3	6.20168e-05	6.38046e-05	0.000296698	3.25916e-05	0.000183006	Invasive
USP6NL	6.1819e-05	2.56066e-05	0.000425147	7.0533e-05	2.23926e-05	Invasive
USP53	6.18026e-05	0.000105478	0.000678933	0.00033155	0.000356516	Invasive
MAD1L1	6.16988e-05	1.69694e-25	0.000342041	4.36584e-25	5.35771e-05	Invasive
ACAP2	6.16748e-05	0.000341909	0.000533531	8.10113e-05	0.000211195	Invasive
TMEM41B	6.15127e-05	7.60449e-05	0.000323242	0.000157028	0.000115806	Invasive
SPPL2A	6.15043e-05	2.52667e-05	0.00029118	2.45556e-05	0.000178129	Invasive
TMEM181	6.08655e-05	1.77813e-08	0.000414036	7.67721e-05	0.000210709	Invasive
WIPF2	6.07953e-05	0.00010099	0.000256105	4.36584e-25	0.000126902	Invasive
ACSL3	6.01547e-05	0.000107675	0.000400595	0.000121437	0.000260477	Invasive
KMT5B	5.95375e-05	0.00039929	0.000413514	3.85375e-05	0.000192116	Invasive
SLC39A11	5.91789e-05	1.69694e-25	0.000441927	4.36584e-25	2.78196e-05	Invasive
CHCHD3	5.91279e-05	0.000195085	0.00042917	7.72114e-05	1.55572e-25	Invasive
IL6ST	5.91155e-05	4.45098e-05	0.000278005	7.00505e-05	0.000202367	Invasive
UBE4A	5.88114e-05	0.000101947	0.000284147	0.000125543	9.37538e-05	Invasive
GULP1	5.87728e-05	1.69694e-25	0.000783292	4.85041e-05	0.000144004	Invasive
CREB1	5.83327e-05	2.43257e-05	0.000366634	0.000120067	8.66109e-05	Invasive
COA1	5.78221e-05	0.000156278	0.000356463	8.15943e-05	2.73455e-05	Invasive
CTTNBP2NL	5.78161e-05	3.9345e-05	0.000365886	0.000161105	0.000167966	Invasive
VAPB	5.7269e-05	0.000218002	0.000318908	0.000123048	6.39369e-08	Invasive
SH3RF2	5.72642e-05	1.69694e-25	0.000469701	7.12537e-05	1.92262e-13	Invasive
STK4	5.67891e-05	0.000389282	0.000430473	0.000151508	7.94502e-05	Invasive
SRPK2	5.66618e-05	0.000187679	0.000536194	8.99353e-05	7.9637e-08	Invasive
CCDC91	5.66379e-05	0.000303649	0.000657247	1.81448e-05	4.5611e-05	Invasive
ZNF292	5.64397e-05	0.000123956	0.000944573	0.000203274	0.000690067	Invasive
PRKCI	5.63829e-05	0.000206307	0.00039865	4.48567e-05	9.79722e-05	Invasive
CSPP1	5.63827e-05	0.000238552	0.000351323	0.000159833	0.00016319	Invasive
ESYT2	5.6227e-05	9.30679e-05	0.000454453	2.77263e-05	0.00024613	Invasive
LPGAT1	5.61293e-05	0.000127227	0.000322373	6.85304e-05	0.000104896	Invasive
TTC17	5.60833e-05	1.78371e-05	0.000709911	0.000174511	0.000164117	Invasive
PPHLN1	5.58858e-05	0.000157771	0.000329957	4.54454e-05	0.000111341	Invasive
FNDC3B	5.51635e-05	9.06405e-05	0.00111423	2.84762e-05	0.000139991	Invasive
HELZ2	5.51526e-05	1.69694e-25	0.000297695	0.000198019	0.000158912	Invasive
RBFOX2	5.48405e-05	3.76422e-05	0.00056731	9.41386e-05	0.000109934	Invasive
SAE1	5.48402e-05	7.42105e-05	0.000235609	1.79099e-05	0.000127991	Invasive
MNAT1	5.44757e-05	0.000125675	0.000402362	0.000104833	0.000134449	Invasive
RBMS1	5.38153e-05	5.61245e-09	0.000372329	4.36584e-25	6.1111e-05	Invasive
MET	5.37505e-05	0.000108176	0.000572187	5.5637e-05	0.000195257	Invasive
BIRC6	5.35001e-05	0.000106237	0.00110916	0.00016545	0.000108475	Invasive
NCOR2	5.34622e-05	5.25832e-06	0.000499836	4.49539e-06	0.000268665	Invasive
PREP	5.33318e-05	0.000100205	0.000351374	2.23808e-05	1.65909e-13	Invasive
ZNF638	5.29206e-05	0.000423834	0.000787872	0.000102699	0.000463793	Invasive
PPP4R1	5.28736e-05	1.69694e-25	0.000341507	6.8243e-05	0.000146046	Invasive
VKORC1L1	5.28022e-05	4.20128e-05	0.000350244	2.84339e-05	9.28004e-05	Invasive
SETD5	5.27653e-05	0.000232778	0.000721563	0.000145503	0.000377655	Invasive
NUP98	5.2548e-05	5.53172e-05	0.000407508	4.91407e-06	2.57204e-05	Invasive
ADD1	5.2449e-05	0.000112802	0.000357735	0.000116055	0.000118514	Invasive
XIAP	5.23037e-05	0.000367134	0.000476308	9.54256e-05	0.000202919	Invasive
TMCO3	5.20253e-05	6.02616e-05	0.000249306	0.000133263	0.000138195	Invasive
TM9SF4	5.17057e-05	4.0341e-05	0.000276113	4.48046e-05	8.08226e-05	Invasive
ABHD12	5.16237e-05	8.2322e-05	0.000303261	4.3478e-05	3.23046e-05	Invasive
NT5C2	5.15071e-05	1.64126e-19	0.000646162	8.44134e-07	0.000188155	Invasive
NAA16	5.12821e-05	0.000148134	0.000284394	0.000137492	0.000144099	Invasive
NAA35	5.12522e-05	0.000226665	0.000240101	1.22299e-05	5.57565e-05	Invasive
ARHGAP18	5.1198e-05	0.000164189	0.000436045	0.00027142	0.00016294	Invasive
TMEM87B	5.10883e-05	5.69158e-17	0.000366457	8.91963e-05	0.000228022	Invasive
TRIP12	5.10261e-05	0.000153821	0.000716385	0.000264027	0.000294637	Invasive
STRN3	5.07771e-05	8.96575e-05	0.000544557	2.54173e-06	0.000116472	Invasive
IKBKB	5.06962e-05	1.69694e-25	0.000320827	0.00025111	8.86408e-05	Invasive
KDM5B	5.03979e-05	0.00015236	0.000396799	2.15396e-05	0.000395524	Invasive
PRELID2	5.02638e-05	1.69694e-25	0.000629156	0.000132895	1.55572e-25	Invasive
SH3D19	5.02366e-05	7.61369e-05	0.000886995	0.000138206	0.000139921	Invasive
SEC23A	5.02349e-05	2.19892e-05	0.00032353	4.32185e-05	0.000120992	Invasive
PALLD	5.02181e-05	5.40116e-05	0.000381711	4.36584e-25	0.000301231	Invasive
ABCD3	5.02017e-05	3.10087e-05	0.000355327	2.40417e-05	9.54914e-05	Invasive
TRIM2	5.01641e-05	9.56292e-05	0.000588713	0.000243296	0.000265805	Invasive
PDZD8	5.01626e-05	0.000304425	0.00037239	0.000135064	0.000332661	Invasive
MIA2	5.01502e-05	6.60496e-05	0.000437046	6.6676e-05	0.000291104	Invasive
NDUFS1	4.98878e-05	0.000275475	0.000283101	3.48396e-06	0.000174307	Invasive
EML4	4.98359e-05	0.000475024	0.000600313	0.000266556	0.000353768	Invasive
KIF16B	4.97814e-05	2.43816e-05	0.000427097	0.000199901	0.000140164	Invasive
ANO6	4.97602e-05	9.95749e-05	0.000382618	1.26905e-05	1.55572e-25	Invasive
VPS37B	4.95906e-05	4.38995e-05	0.000410447	0.0001582	0.000172973	Invasive
TBC1D5	4.91916e-05	7.65144e-05	0.000697177	2.84811e-05	1.96367e-07	Invasive
MVP	4.91344e-05	2.32237e-05	0.000387078	9.16675e-05	0.000371916	Invasive
USP25	4.89687e-05	7.81726e-05	0.000373642	2.06115e-07	8.21178e-20	Invasive
HDAC8	4.88647e-05	2.62158e-15	0.000434812	3.42287e-05	4.23706e-05	Invasive
ERGIC1	4.88245e-05	8.9736e-05	0.000395016	4.78345e-25	0.000239235	Invasive
CSNK1G3	4.87138e-05	9.23052e-05	0.000292468	9.18667e-05	9.38119e-05	Invasive
KATNBL1	4.87137e-05	0.000214835	0.000365975	0.000180783	6.56736e-05	Invasive
HOOK3	4.85159e-05	6.47343e-05	0.000539331	8.3563e-05	0.000291871	Invasive
LARP4	4.8213e-05	0.00024433	0.000346699	0.000119147	5.65551e-05	Invasive
DOCK5	4.81465e-05	1.69694e-25	0.000850246	4.93405e-05	0.000124406	Invasive
HNF4A	4.80513e-05	3.3673e-12	0.000630319	7.81495e-05	0.00017678	Invasive
CTDSPL2	4.78698e-05	0.000113972	0.000282454	0.000257159	0.000165498	Invasive
SEC31A	4.77914e-05	0.000312285	0.000511678	0.000233984	0.000381816	Invasive
SMCHD1	4.77636e-05	0.000467054	0.000895002	0.000167988	0.000453972	Invasive
PKP4	4.77605e-05	0.000203458	0.000763596	4.36584e-25	0.000156147	Invasive
USP12	4.77089e-05	0.000163095	0.000344115	5.19224e-05	8.65557e-05	Invasive
RABGEF1	4.75734e-05	1.15897e-21	0.000434084	5.67952e-05	2.66081e-05	Invasive
MCU	4.75297e-05	3.86647e-05	0.000995175	6.10622e-05	0.000164906	Invasive
FAM13A	4.74771e-05	1.27385e-05	0.000368801	0.000108362	0.000164318	Invasive
LONP2	4.74666e-05	0.000149197	0.000405943	0.000145244	0.000192004	Invasive
NCOA6	4.73662e-05	0.000103783	0.000503571	9.86995e-05	9.16684e-05	Invasive
EPS8	4.73531e-05	0.000114093	0.000883294	0.000592517	0.000615406	Invasive
SP140L	4.72022e-05	0.000104659	0.000308513	5.17085e-05	0.000225916	Invasive
NDUFAF6	4.71243e-05	0.000246324	0.000265537	4.25251e-05	1.91821e-07	Invasive
PPFIBP1	4.70444e-05	9.4545e-05	0.000581765	1.67917e-05	0.000172722	Invasive
NSD1	4.70013e-05	0.000248881	0.000478816	0.000166991	0.000195052	Invasive
CSE1L	4.67748e-05	0.000194705	0.000242289	4.0222e-05	2.17226e-05	Invasive
COMMD1	4.67581e-05	0.000126677	0.000360348	3.55883e-05	1.55572e-25	Invasive
CCNH	4.64145e-05	7.24758e-05	0.000314271	6.42481e-05	8.02307e-05	Invasive
USP33	4.64111e-05	8.95019e-05	0.000391015	0.000136227	0.000187751	Invasive
INO80	4.62241e-05	0.000155461	0.000345754	0.000212753	2.67394e-05	Invasive
CCDC50	4.62021e-05	0.000275997	0.000286136	0.000221792	0.000249193	Invasive
CAMSAP2	4.60819e-05	1.75268e-05	0.000326239	1.74386e-05	0.000148673	Invasive
MAP2K4	4.60019e-05	6.52585e-06	0.000410433	4.36584e-25	1.53763e-05	Invasive
DENND1B	4.59246e-05	8.65605e-16	0.000399821	6.70188e-05	2.12904e-05	Invasive
LPIN2	4.59118e-05	0.000105916	0.000558577	0.000395377	0.000200993	Invasive
TRAF3	4.58436e-05	7.23397e-05	0.000376937	8.24205e-06	1.55572e-25	Invasive
PLEC	4.57389e-05	1.69694e-25	0.00078655	0.000600852	0.000366658	Invasive
YAP1	4.52835e-05	8.00471e-07	0.000809981	1.4379e-05	5.50794e-05	Invasive
QSOX1	4.52767e-05	6.75378e-06	0.000369354	4.36584e-25	0.000223674	Invasive
ATXN2	4.51609e-05	0.000192284	0.000527291	8.80385e-05	0.000163804	Invasive
ITPR3	4.51027e-05	1.74793e-12	0.000572354	0.000103317	0.00035604	Invasive
POC1B	4.49863e-05	0.000171727	0.000298426	3.43462e-05	4.6259e-06	Invasive
CPD	4.48734e-05	4.12151e-08	0.00034626	0.000112313	0.000168436	Invasive
SPG11	4.4813e-05	4.64268e-06	0.000444932	0.000169683	0.000125536	Invasive
PIK3CB	4.47386e-05	7.29546e-05	0.000498771	4.12036e-05	8.61574e-05	Invasive
SMG7	4.47191e-05	2.40491e-05	0.000487247	2.49101e-05	0.000154217	Invasive
SMIM14	4.47143e-05	7.71336e-05	0.000234336	4.36584e-25	0.000226663	Invasive
SLC20A2	4.46247e-05	3.19887e-07	0.000457822	0.000228626	4.38937e-05	Invasive
GPATCH8	4.45683e-05	8.09767e-05	0.000548667	0.000145159	0.000231524	Invasive
HNF4G	4.4449e-05	7.32802e-05	0.000594014	8.85612e-05	4.39673e-06	Invasive
APPL2	4.40557e-05	1.46359e-05	0.000419003	4.36584e-25	0.000110073	Invasive
RCOR3	4.39961e-05	1.24255e-05	0.000296212	0.000101396	9.92287e-05	Invasive
TBK1	4.39177e-05	7.99434e-05	0.000275187	2.40029e-05	0.000142088	Invasive
CRK	4.38727e-05	0.000138133	0.000310916	0.000142017	0.000189678	Invasive
ABCC1	4.38511e-05	1.69694e-25	0.000429292	5.64294e-06	3.97216e-05	Invasive
UBR5	4.35929e-05	0.000244873	0.000816851	0.000105059	0.0001604	Invasive
STAT6	4.3457e-05	4.47594e-05	0.000453722	0.000182188	0.000365424	Invasive
ABHD3	4.33933e-05	1.69694e-25	0.000559822	0.000253343	0.000128134	Invasive
RFX3	4.33181e-05	1.38792e-05	0.000429005	4.36584e-25	8.19161e-06	Invasive
ANTXR2	4.31952e-05	6.53074e-06	0.000428374	4.74283e-07	0.000144193	Invasive
MKLN1	4.31403e-05	0.000116343	0.000684072	0.000112884	7.5862e-05	Invasive
HIBCH	4.2924e-05	0.000106908	0.000407711	8.1241e-05	0.000104812	Invasive
CDYL	4.27133e-05	4.15047e-05	0.000489031	0.000241339	9.96039e-05	Invasive
RNF115	4.26404e-05	0.000114706	0.000316102	0.00025759	3.61772e-05	Invasive
EPC1	4.26236e-05	0.000183402	0.000449926	0.00022742	0.000374932	Invasive
TLN2	4.25571e-05	2.69358e-05	0.000474858	0.000290829	6.10352e-05	Invasive
MST1R	4.22447e-05	1.69694e-25	0.000324543	0.000141968	0.000241596	Invasive
PUM2	4.22115e-05	0.000104159	0.000888515	4.73239e-05	0.000153704	Invasive
TPP2	4.19206e-05	0.000254123	0.000312226	4.36584e-25	0.000134382	Invasive
SLC38A1	4.14117e-05	0.000404921	0.000421872	4.36584e-25	0.000229687	Invasive
EPC2	4.1298e-05	0.000108801	0.00032063	6.02309e-05	3.14282e-05	Invasive
RAF1	4.10507e-05	4.65192e-05	0.000301072	6.722e-05	5.9634e-05	Invasive
HECTD1	4.08168e-05	0.000378841	0.000581435	0.00010328	0.000339954	Invasive
INPP4B	4.05133e-05	2.94344e-15	0.000637214	1.21201e-06	1.36197e-05	Invasive
ASXL1	4.05096e-05	0.000176776	0.000463124	0.000461192	0.000188026	Invasive
MECP2	4.0312e-05	0.000118395	0.000257695	0.000183749	9.51695e-05	Invasive
CAB39	4.02104e-05	1.83555e-05	0.000645307	9.295e-05	0.000227768	Invasive
OSBPL9	4.0128e-05	4.42022e-05	0.000338411	5.50309e-05	8.00918e-05	Invasive
GLG1	4.00077e-05	0.000104812	0.000547175	6.56829e-05	0.000249756	Invasive
ECE1	3.99488e-05	3.70594e-05	0.000265663	3.29429e-06	0.000146643	Invasive
INTS8	3.99435e-05	0.000215441	0.000268087	4.29772e-05	1.1999e-07	Invasive
GNAQ	3.98087e-05	5.08527e-05	0.00075864	2.04376e-05	8.55448e-05	Invasive
ZFAND3	3.97171e-05	1.69694e-25	0.00114418	3.49849e-05	3.10511e-05	Invasive
RBM26	3.96682e-05	0.000333392	0.000549767	0.000267924	0.000267117	Invasive
GATA6	3.95447e-05	0.000126194	0.000348856	0.00020779	0.000245211	Invasive
UGGT2	3.92797e-05	2.39476e-05	0.000566905	0.000130104	6.52132e-05	Invasive
RARS2	3.9066e-05	8.283e-05	0.000283134	6.61548e-06	6.04178e-05	Invasive
COMMD10	3.90067e-05	6.86794e-05	0.000494706	4.36584e-25	7.60041e-06	Invasive
MAPK14	3.88141e-05	5.0443e-05	0.000405339	1.63814e-05	9.44882e-05	Invasive
SETD2	3.83604e-05	0.000211618	0.000557223	0.000154367	0.000355864	Invasive
ECPAS	3.83125e-05	0.000162352	0.000477968	2.96592e-05	0.000207049	Invasive
USP22	3.82957e-05	8.00926e-05	0.000251266	3.31081e-05	0.000160669	Invasive
MYO1E	3.81224e-05	6.50415e-05	0.000946374	0.000399115	6.45371e-05	Invasive
MTA3	3.79231e-05	2.43456e-05	0.000445769	7.79873e-05	4.04886e-06	Invasive
BABAM2	3.78278e-05	1.69694e-25	0.000553906	4.73089e-06	8.17855e-06	Invasive
KDM7A	3.75521e-05	1.40479e-05	0.000462892	0.000191918	0.000110335	Invasive
SOS2	3.74586e-05	2.3845e-20	0.000355615	1.73341e-05	5.85925e-05	Invasive
NIPBL	3.74021e-05	0.000679879	0.00083474	0.00012796	0.000769852	Invasive
CCSER2	3.72312e-05	7.32437e-05	0.00035021	0.000185669	4.56669e-05	Invasive
CERS6	3.7227e-05	0.000261021	0.000766727	0.000139012	5.27308e-05	Invasive
DNAJC5	3.72068e-05	4.4865e-22	0.000511384	7.66596e-06	4.18056e-05	Invasive
MDM2	3.71267e-05	0.000187287	0.000245382	0.000127658	0.000142146	Invasive
SRGAP1	3.7068e-05	7.74673e-05	0.000675443	4.31559e-05	6.71342e-05	Invasive
PPP1R21	3.70389e-05	9.84317e-05	0.000332842	1.23973e-05	5.6673e-05	Invasive
TNIK	3.67409e-05	8.9921e-05	0.000557416	0.000131356	9.72219e-05	Invasive
MAP4K5	3.65149e-05	0.000110972	0.000443677	2.32797e-05	0.000113966	Invasive
PPP6R3	3.64971e-05	3.92391e-05	0.00080575	0.000101993	0.000130787	Invasive
SLC25A36	3.64887e-05	0.000165709	0.000333236	7.64323e-05	0.000214699	Invasive
LMBRD1	3.63435e-05	5.59175e-05	0.000292252	4.55433e-05	0.000129364	Invasive
ACLY	3.6284e-05	0.000277959	0.000337222	2.71062e-05	7.41201e-05	Invasive
SLC35F5	3.62765e-05	6.93704e-05	0.000319791	6.92103e-05	4.45637e-05	Invasive
TUG1	3.62656e-05	0.000129518	0.000239063	4.36584e-25	0.00021773	Invasive
GAPVD1	3.59626e-05	0.000110729	0.000272023	8.91073e-05	5.36875e-05	Invasive
SESTD1	3.59136e-05	2.55149e-10	0.000455953	5.2945e-05	0.00018273	Invasive
LAMB1	3.55601e-05	0.000116163	0.000252663	0.000101847	0.000177816	Invasive
MYH14	3.55372e-05	1.69694e-25	0.000801136	0.000196478	0.000302992	Invasive
VRK2	3.54789e-05	0.000154654	0.000372036	4.36584e-25	2.0504e-05	Invasive
DNAJB14	3.52939e-05	0.000121794	0.000280069	0.000255827	5.1247e-05	Invasive
SEC24D	3.52345e-05	8.96337e-13	0.000333937	4.36584e-25	9.97733e-05	Invasive
PDE4D	3.51878e-05	1.69694e-25	0.00121824	3.86735e-06	1.52213e-05	Invasive
CUX1	3.5112e-05	0.000142742	0.00104367	0.00039797	7.93903e-05	Invasive
MAP3K5	3.50259e-05	9.1546e-05	0.000679494	4.36584e-25	9.23393e-05	Invasive
RLF	3.49358e-05	0.000145558	0.000285987	3.38123e-05	0.000140884	Invasive
USP15	3.47707e-05	0.000227716	0.000598106	0.000448787	0.000262905	Invasive
CHD4	3.47284e-05	0.00028117	0.000286923	3.33878e-05	0.000268161	Invasive
CTDSPL	3.47281e-05	3.53201e-06	0.000329501	4.05543e-06	7.90332e-05	Invasive
ATG4B	3.45566e-05	2.48976e-05	0.000254871	5.00011e-05	0.000231072	Invasive
FAR1	3.44568e-05	1.513e-22	0.000657465	0.000513191	0.000181046	Invasive
PLEKHA1	3.43766e-05	0.00010599	0.000392996	0.000172613	0.000366501	Invasive
TFCP2	3.42844e-05	1.69694e-25	0.000389876	0.000102361	3.8547e-05	Invasive
RASAL2	3.42619e-05	5.47261e-07	0.000825761	7.18825e-05	6.04365e-06	Invasive
MLLT3	3.42131e-05	1.69694e-25	0.000470255	3.69392e-05	2.39446e-05	Invasive
AFF4	3.41085e-05	0.000205817	0.000598531	0.000192963	0.000349338	Invasive
PTPN3	3.40473e-05	1.69694e-25	0.000414486	1.00043e-05	3.7095e-05	Invasive
LPP	3.38046e-05	0.000126093	0.00126954	0.000186056	0.000510621	Invasive
TOX3	3.37799e-05	5.92459e-05	0.000541437	1.74685e-05	4.08593e-05	Invasive
UIMC1	3.37305e-05	9.28885e-05	0.000296081	1.69811e-05	0.000124003	Invasive
UPF2	3.36453e-05	0.000287897	0.000417353	0.000383456	0.000409373	Invasive
C1orf21	3.35258e-05	0.000238673	0.000265602	0.000203228	0.000230131	Invasive
ACER3	3.34258e-05	5.26706e-05	0.000364483	4.36584e-25	1.67242e-05	Invasive
NCEH1	3.33798e-05	1.69694e-25	0.000380637	4.8614e-05	0.00012606	Invasive
RICTOR	3.33329e-05	2.85927e-05	0.000586464	2.7531e-05	0.000164301	Invasive
SHOC2	3.31667e-05	7.92028e-05	0.00036585	0.000224323	0.000314685	Invasive
DICER1	3.30607e-05	0.000213896	0.000352017	0.000105835	0.000214746	Invasive
LAMC1	3.2975e-05	7.03348e-05	0.000340986	4.36584e-25	9.22651e-05	Invasive
ARIH1	3.2962e-05	0.000135273	0.000605988	0.000216576	0.000153261	Invasive
TASP1	3.29494e-05	5.18311e-05	0.000407056	2.38296e-05	1.16061e-05	Invasive
STAT2	3.28592e-05	1.69694e-25	0.000340585	6.85808e-05	0.00015846	Invasive
ATP2C1	3.27924e-05	2.15489e-05	0.000343572	0.000137544	0.000132086	Invasive
WASF2	3.27799e-05	0.000231801	0.000466597	0.000200614	0.000168532	Invasive
PAM	3.26892e-05	1.69694e-25	0.000499357	5.89488e-06	9.60822e-05	Invasive
MICU2	3.25005e-05	0.000184761	0.000361952	5.12349e-05	7.75495e-05	Invasive
ATP11A	3.24035e-05	8.81084e-05	0.000572566	6.82283e-21	0.000136427	Invasive
FGD6	3.22773e-05	1.69694e-25	0.000319873	0.00011728	0.000110588	Invasive
CCNY	3.2241e-05	0.000167061	0.000555914	5.44527e-06	1.12966e-06	Invasive
TNFAIP8	3.1742e-05	1.69694e-25	0.00049588	4.36584e-25	4.31164e-05	Invasive
FOXJ3	3.1688e-05	8.54388e-08	0.000425614	0.000133356	3.98635e-05	Invasive
POGZ	3.14675e-05	2.26614e-05	0.00044084	0.00036626	0.000186832	Invasive
TFDP2	3.14557e-05	0.000234411	0.000325631	0.000128008	6.19085e-05	Invasive
GPCPD1	3.1169e-05	1.69694e-25	0.000460723	0.000140235	0.000161075	Invasive
CHD7	3.10705e-05	0.000256627	0.000600743	0.000339323	0.000374923	Invasive
SEC23IP	3.09484e-05	4.1291e-05	0.000260046	5.90913e-05	0.000234433	Invasive
RAB3GAP2	3.08803e-05	7.63565e-05	0.000393747	0.000187933	0.000123977	Invasive
GRHL2	3.08481e-05	7.12376e-22	0.00061579	3.24233e-05	1.55572e-25	Invasive
PIK3C3	3.0585e-05	6.97147e-05	0.000290498	0.000167783	8.73135e-05	Invasive
RC3H1	3.05364e-05	2.53266e-08	0.000443448	0.000103431	0.000176238	Invasive
LNPEP	3.03152e-05	4.15931e-05	0.000284969	0.000106865	9.66779e-05	Invasive
PHC3	2.95885e-05	4.39779e-08	0.000385522	0.000158644	6.30125e-05	Invasive
BACH1	2.95087e-05	7.97529e-09	0.000557227	8.19537e-05	0.000108292	Invasive
PARD3	2.95001e-05	0.000114881	0.00104447	4.47623e-05	3.9079e-05	Invasive
NPC1	2.94739e-05	3.36511e-12	0.000483905	0.000169775	5.64018e-05	Invasive
MYO10	2.94403e-05	0.000155082	0.000799296	0.000119186	0.000258459	Invasive
EDEM3	2.93873e-05	0.000102718	0.000403973	0.000152193	0.00023115	Invasive
PRKAA1	2.92838e-05	0.000120996	0.000246156	7.13825e-05	0.000184452	Invasive
AGAP1	2.92194e-05	1.69694e-25	0.00104296	4.36584e-25	2.12115e-05	Invasive
MLLT6	2.92165e-05	0.000132721	0.000506944	0.000122888	8.46474e-05	Invasive
CEACAM1	2.91204e-05	2.99374e-05	0.000518565	1.81357e-05	0.000311053	Invasive
EVI5	2.89053e-05	5.13225e-05	0.000818129	4.72991e-05	6.94225e-05	Invasive
AP2A2	2.88891e-05	0.000109999	0.000331747	6.54609e-05	0.000116842	Invasive
VPS8	2.83283e-05	2.4256e-06	0.000418339	8.01251e-05	8.26574e-07	Invasive
TDRD3	2.81799e-05	0.000130016	0.000352574	3.88065e-05	4.68041e-05	Invasive
BTBD7	2.80414e-05	1.93095e-05	0.00044487	9.13995e-05	0.000159607	Invasive
RASA2	2.78652e-05	1.23246e-13	0.000517382	2.17896e-05	0.000137736	Invasive
COP1	2.78327e-05	5.4828e-06	0.000765225	4.51148e-06	3.96908e-05	Invasive
ARAP2	2.77187e-05	9.8467e-06	0.000374271	8.95208e-05	0.000121175	Invasive
MSH3	2.76809e-05	0.00012792	0.000357621	0.000172834	7.38773e-05	Invasive
PSEN1	2.75602e-05	0.000100091	0.00044215	0.000253237	0.000228401	Invasive
TENT2	2.74398e-05	4.72085e-05	0.000372704	5.34931e-05	3.5814e-05	Invasive
NEK7	2.72135e-05	6.65594e-22	0.000512354	6.19594e-05	7.413e-05	Invasive
TRMT11	2.71829e-05	0.000138849	0.000715899	0.00021464	3.93227e-05	Invasive
UBL3	2.69384e-05	3.07864e-05	0.000417362	9.142e-05	0.000375838	Invasive
RPRD2	2.69188e-05	7.89561e-05	0.000410345	0.000208967	5.88097e-05	Invasive
CLMN	2.69153e-05	3.77031e-15	0.000426425	0.000181758	0.000174033	Invasive
R3HCC1L	2.67102e-05	2.99008e-05	0.000300779	0.000172051	8.61604e-05	Invasive
ARFGAP1	2.66344e-05	3.91568e-05	0.000418297	0.000170921	0.00028782	Invasive
APBB2	2.65974e-05	1.69694e-25	0.000552929	5.69913e-05	2.36745e-10	Invasive
IGF2BP3	2.6593e-05	2.52661e-05	0.000393117	2.34645e-05	5.61741e-05	Invasive
LEMD3	2.65771e-05	9.2864e-05	0.000303471	9.27305e-05	1.27567e-06	Invasive
SUPT3H	2.65111e-05	7.86816e-08	0.00044592	4.36584e-25	1.55572e-25	Invasive
UGGT1	2.64967e-05	3.84466e-05	0.000262956	8.11746e-05	0.000133447	Invasive
GATAD2B	2.60701e-05	1.68778e-05	0.000492278	7.95566e-05	4.62321e-05	Invasive
TBC1D15	2.59845e-05	0.000193167	0.000257152	1.0906e-05	0.000171017	Invasive
MFHAS1	2.59415e-05	8.80658e-05	0.000317565	1.1435e-05	4.28141e-05	Invasive
ATG5	2.58919e-05	0.000307544	0.000332421	3.51286e-06	4.48469e-05	Invasive
B4GALT5	2.53972e-05	4.90823e-05	0.000572229	4.36584e-25	0.000122763	Invasive
FCHO2	2.53379e-05	1.08163e-05	0.000309933	0.000125797	0.000161137	Invasive
LARP4B	2.5288e-05	0.000167069	0.000624816	3.11925e-06	0.000154065	Invasive
MICAL2	2.50616e-05	4.75641e-05	0.000497303	6.8848e-05	4.31879e-05	Invasive
MAVS	2.50155e-05	4.97898e-05	0.000304238	0.000142726	0.000147349	Invasive
RNF10	2.49589e-05	0.000112024	0.00022848	0.000164277	0.000143035	Invasive
CAPRIN2	2.49155e-05	4.86849e-24	0.00033889	9.36461e-05	0.000123446	Invasive
DDX60	2.41712e-05	1.69694e-25	0.000486253	4.36584e-25	0.000116444	Invasive
PARP8	2.41521e-05	3.91555e-05	0.00051056	2.9672e-05	1.55572e-25	Invasive
SMYD3	2.41315e-05	2.03291e-05	0.000877048	6.19328e-05	1.55572e-25	Invasive
NRIP1	2.41049e-05	0.000117285	0.000348813	4.36584e-25	0.000182592	Invasive
PRDM2	2.40575e-05	0.000148536	0.000289047	7.92203e-05	0.000216793	Invasive
WDR70	2.39283e-05	0.000230395	0.000489847	2.38608e-05	2.92561e-05	Invasive
SMAD3	2.36089e-05	1.33645e-12	0.000725797	4.22712e-05	0.000101347	Invasive
SERINC5	2.35008e-05	7.60487e-07	0.000510794	0.000216782	0.000154797	Invasive
ZNF721	2.34833e-05	6.26093e-05	0.000391985	0.000193501	0.000107919	Invasive
SDCCAG8	2.34488e-05	0.000185588	0.000524043	0.000130255	0.000135131	Invasive
SVIL	2.34067e-05	6.59777e-05	0.000735318	7.28782e-05	2.6576e-05	Invasive
AFF1	2.33505e-05	4.87275e-05	0.000676957	7.1251e-06	5.27524e-05	Invasive
CDR2	2.3216e-05	1.91583e-05	0.000406416	0.000109658	6.42607e-05	Invasive
RNGTT	2.31806e-05	2.85642e-05	0.000444703	1.46406e-05	1.26542e-05	Invasive
GALNT2	2.31675e-05	3.73753e-05	0.000302286	7.64899e-06	0.000102785	Invasive
RAB3GAP1	2.31241e-05	0.000119862	0.000532645	4.36584e-25	0.000146289	Invasive
IMMP2L	2.30056e-05	3.89564e-07	0.000715908	5.60909e-05	1.55572e-25	Invasive
RYK	2.29621e-05	4.13825e-05	0.000316956	0.00010657	7.95199e-05	Invasive
PELI1	2.29613e-05	1.22125e-10	0.000401928	0.00011377	0.000263416	Invasive
TTLL5	2.28802e-05	1.37288e-05	0.000349174	4.81567e-05	3.06909e-05	Invasive
STX16	2.28694e-05	0.000133775	0.000469558	8.22343e-05	0.000146419	Invasive
WDFY1	2.28027e-05	9.70094e-05	0.000315189	2.20827e-05	6.17606e-05	Invasive
FARS2	2.27439e-05	1.69694e-25	0.000463236	8.44145e-06	1.55572e-25	Invasive
SGMS1	2.27068e-05	7.08443e-05	0.000368735	0.000128045	2.31695e-05	Invasive
TET2	2.25743e-05	5.53498e-05	0.000326063	0.000118382	8.52872e-05	Invasive
ZNFX1	2.23676e-05	4.68955e-05	0.000415952	6.51718e-05	0.000288296	Invasive
CHKA	2.22413e-05	4.56044e-05	0.000539205	1.66336e-05	0.000160047	Invasive
MAGED1	2.2209e-05	3.8174e-05	0.000297863	4.36584e-25	0.000186897	Invasive
SLC12A2	2.18872e-05	0.000608561	0.000687859	4.51812e-05	0.000528578	Invasive
PHKB	2.18083e-05	9.34612e-05	0.00042716	0.000121637	7.00909e-05	Invasive
PSD3	2.1384e-05	1.69694e-25	0.000663029	3.76228e-06	5.46268e-05	Invasive
PTPN14	2.13718e-05	4.39074e-06	0.000419252	4.36584e-25	2.20819e-05	Invasive
ETV6	2.12448e-05	7.27407e-06	0.000750367	1.8373e-05	8.25977e-05	Invasive
NSD2	2.11025e-05	0.000197387	0.000398016	6.63253e-05	7.63616e-05	Invasive
FBXW7	2.10935e-05	0.000150188	0.000661386	0.000128389	0.000106417	Invasive
GPD2	2.09689e-05	1.69694e-25	0.000468056	3.37307e-05	6.77691e-05	Invasive
FNIP1	2.09664e-05	1.69694e-25	0.000662777	0.000332577	4.68586e-05	Invasive
GAK	2.09542e-05	3.75497e-05	0.000364243	0.000199368	0.000181848	Invasive
DIDO1	2.08689e-05	0.000192733	0.000432928	0.000257469	0.000103039	Invasive
FOXO1	2.08608e-05	6.34313e-07	0.000559098	1.36864e-06	8.26029e-05	Invasive
TAF15	2.07564e-05	0.00042326	0.000529453	0.000257406	0.000213299	Invasive
SLC7A1	2.06342e-05	2.5447e-05	0.000337327	4.05807e-05	7.25747e-05	Invasive
EIF4G3	2.05977e-05	0.000349522	0.00089326	0.000149896	0.000300038	Invasive
NF1	2.04098e-05	0.000133346	0.00074603	0.00017563	7.81886e-05	Invasive
RNF111	2.03529e-05	9.54361e-25	0.000374363	9.71497e-05	3.80373e-05	Invasive
SLC45A4	2.03252e-05	1.05596e-05	0.000370008	0.000133999	8.28138e-05	Invasive
STAG1	2.03193e-05	0.000144497	0.000750386	0.000185128	3.38069e-05	Invasive
GSE1	2.02534e-05	8.29485e-05	0.000443825	1.26741e-05	0.000172276	Invasive
DAAM1	2.01602e-05	0.000111855	0.000391162	4.36584e-25	0.000305692	Invasive
PTPRJ	2.01602e-05	5.31525e-08	0.000573116	5.41922e-05	1.55572e-25	Invasive
DNM2	2.00384e-05	9.34224e-19	0.000689275	0.000298406	0.000284966	Invasive
SPRED1	1.99696e-05	1.18531e-08	0.000392179	5.07878e-25	5.00953e-05	Invasive
MLLT10	1.99691e-05	0.000103166	0.000502404	9.52233e-05	8.50687e-05	Invasive
PHYKPL	1.9967e-05	2.90341e-05	0.000351741	0.00011907	0.000121692	Invasive
RUFY3	1.9767e-05	1.25221e-05	0.000349895	3.33675e-05	0.000158373	Invasive
PUM1	1.97449e-05	0.000229357	0.000654839	0.000322267	0.000232911	Invasive
ITGB8	1.97189e-05	2.02522e-23	0.000333166	3.01273e-05	0.000169629	Invasive
ANKS1A	1.95907e-05	1.65137e-10	0.000487004	5.76591e-06	6.2045e-05	Invasive
IGF2R	1.93646e-05	0.000147786	0.000403504	5.17875e-05	0.000141565	Invasive
OGDH	1.93605e-05	1.69694e-25	0.000459711	4.90619e-05	0.000153528	Invasive
ITFG1	1.93373e-05	5.50004e-05	0.000706195	4.0259e-05	6.28567e-05	Invasive
MON2	1.92081e-05	7.35996e-06	0.000670373	0.000113786	9.01892e-05	Invasive
BTAF1	1.91193e-05	9.8257e-05	0.000385909	0.000218823	0.000128336	Invasive
FA2H	1.90348e-05	1.69694e-25	0.000400397	4.79582e-06	0.000121878	Invasive
SND1	1.89917e-05	6.36037e-05	0.000732826	5.76045e-05	5.21085e-05	Invasive
RAPGEF1	1.89749e-05	1.41247e-11	0.000418303	2.24672e-05	5.94293e-05	Invasive
FRYL	1.88154e-05	0.00012065	0.000670581	0.000251998	0.000170887	Invasive
ENOSF1	1.88015e-05	0.000269365	0.000347181	9.50332e-05	0.000175192	Invasive
SNX14	1.86044e-05	6.60389e-05	0.000401056	4.36584e-25	0.000164541	Invasive
UBE3C	1.85845e-05	0.000131734	0.000522251	0.000119745	6.45284e-05	Invasive
FBXO11	1.85551e-05	5.59864e-05	0.000689888	1.77994e-05	0.000123285	Invasive
CRIM1	1.84774e-05	3.01272e-25	0.000411786	5.92849e-05	0.000155369	Invasive
SRC	1.81748e-05	7.81038e-06	0.000292368	8.67668e-05	0.000166854	Invasive
PLEKHA7	1.8139e-05	1.69694e-25	0.000906283	0.000118794	3.20957e-05	Invasive
NLRC5	1.81018e-05	1.69694e-25	0.000462121	7.76361e-05	0.000103189	Invasive
CDK6	1.80912e-05	7.2733e-05	0.000437291	7.49299e-05	0.000142767	Invasive
ARID5B	1.77676e-05	0.00030355	0.000459496	0.000303084	0.000124898	Invasive
NCOA2	1.77613e-05	1.87188e-20	0.000823536	0.000118859	4.06878e-05	Invasive
LRP5	1.77149e-05	1.69694e-25	0.000387891	4.36584e-25	0.000132131	Invasive
TLK2	1.76826e-05	7.59207e-05	0.000307723	0.000104644	0.000120295	Invasive
OSBPL10	1.76634e-05	6.94145e-23	0.000465018	6.32998e-05	8.22513e-05	Invasive
RREB1	1.73095e-05	2.49968e-05	0.000648641	0.000109386	9.99224e-05	Invasive
RIN2	1.7227e-05	1.69694e-25	0.000498031	3.25377e-05	9.33342e-05	Invasive
SPPL3	1.71768e-05	1.84739e-05	0.000469321	1.33424e-05	4.69112e-05	Invasive
TJP2	1.7152e-05	1.84455e-05	0.000688026	4.36584e-25	5.51245e-05	Invasive
EHMT1	1.70216e-05	0.000268497	0.000621658	0.000151964	0.000159469	Invasive
SYNJ2	1.69844e-05	0.000167062	0.000372497	4.23662e-05	0.000182934	Invasive
KAT6A	1.69727e-05	0.00024266	0.000453845	0.000121809	0.00016946	Invasive
USP34	1.6857e-05	0.000169559	0.000960027	0.000300739	0.000334726	Invasive
SSBP3	1.68255e-05	2.41839e-05	0.000425623	9.44601e-05	9.00389e-05	Invasive
GTF2IRD1	1.67913e-05	1.69694e-25	0.000408227	1.25752e-05	4.02435e-05	Invasive
KLC1	1.66735e-05	5.87571e-05	0.000375268	3.14267e-05	0.000261478	Invasive
MYO9B	1.66622e-05	3.27688e-05	0.00037148	9.33963e-05	0.000215453	Invasive
R3HDM1	1.6656e-05	0.000157534	0.00035547	2.73004e-05	2.78466e-05	Invasive
ATE1	1.64863e-05	0.000138935	0.000456439	0.000104221	6.37973e-05	Invasive
STK38	1.63998e-05	0.00018565	0.000444189	4.36584e-25	0.000108601	Invasive
MAP4K3	1.63506e-05	4.91031e-05	0.000812228	8.6864e-05	3.93333e-05	Invasive
EXT1	1.62439e-05	1.69694e-25	0.00119007	0.0010352	1.55572e-25	Invasive
PATJ	1.61464e-05	0.000137528	0.000996524	0.000426232	0.000334411	Invasive
RAB27B	1.59556e-05	1.69694e-25	0.000475896	0.000331642	0.00021495	Invasive
SOS1	1.59426e-05	0.000174869	0.000590839	2.40217e-05	9.10884e-05	Invasive
NCOR1	1.59417e-05	0.000799642	0.000966937	0.000370449	0.000912244	Invasive
CRYBG1	1.58209e-05	0.000162629	0.000335416	0.000138518	2.87579e-05	Invasive
LCORL	1.57933e-05	7.43708e-05	0.000442803	5.63216e-05	0.000115999	Invasive
SAMD12	1.57708e-05	6.8731e-05	0.00103077	0.000107089	4.44093e-05	Invasive
MTREX	1.56979e-05	0.000272066	0.000350389	0.000111704	0.000179756	Invasive
FMN1	1.56955e-05	5.94489e-08	0.000636699	0.000224904	9.17383e-05	Invasive
SSH2	1.55814e-05	1.69694e-25	0.00103842	2.72645e-05	4.96658e-07	Invasive
METTL15	1.54388e-05	1.69694e-25	0.000512567	0.000147391	1.55572e-25	Invasive
TRAPPC12	1.53946e-05	6.175e-05	0.000387736	1.69035e-05	6.23945e-05	Invasive
TBC1D22A	1.53236e-05	4.11883e-10	0.0008479	0.000105308	6.46213e-22	Invasive
RABL6	1.52551e-05	0.00021292	0.000316272	0.000168408	0.000198723	Invasive
CSNK1G1	1.51801e-05	1.69694e-25	0.000346614	2.44693e-06	5.56419e-05	Invasive
NHSL1	1.51792e-05	1.17393e-05	0.000717298	7.2512e-05	3.03415e-06	Invasive
ATP9B	1.50713e-05	1.69694e-25	0.000427248	0.000291373	1.84919e-12	Invasive
ARHGAP35	1.4942e-05	1.22469e-05	0.000432892	2.23067e-05	7.35482e-05	Invasive
RASA1	1.49306e-05	7.72179e-13	0.000383647	1.16453e-05	9.44263e-05	Invasive
YLPM1	1.4886e-05	0.000104687	0.00030408	6.43683e-05	0.000159313	Invasive
PACSIN2	1.47922e-05	8.09211e-05	0.000470435	4.7746e-05	0.000132702	Invasive
ITGA3	1.47182e-05	1.14905e-05	0.00048493	5.88968e-05	0.000223159	Invasive
DIAPH2	1.44718e-05	0.00030728	0.00096724	0.000920786	0.000227992	Invasive
EPS15	1.44258e-05	5.12691e-05	0.000458582	4.51533e-05	5.96384e-05	Invasive
LRRC1	1.44092e-05	0.000100495	0.000514488	4.36584e-25	0.000102044	Invasive
EXOC1	1.42502e-05	0.000350678	0.000368311	0.000174955	0.000132679	Invasive
ATF7IP	1.40657e-05	9.95809e-05	0.000434991	0.000126086	0.000137891	Invasive
PLCB4	1.40509e-05	5.93654e-05	0.000587738	0.000147542	0.000246806	Invasive
SLC25A13	1.40047e-05	8.3119e-05	0.000442185	0.000169724	8.13447e-05	Invasive
BCAS3	1.38673e-05	1.69694e-25	0.000485621	4.36584e-25	1.55572e-25	Invasive
ASAP1	1.38202e-05	5.77782e-05	0.000597831	4.36584e-25	5.81807e-05	Invasive
DENND4C	1.38192e-05	4.29141e-05	0.000540017	0.000228467	5.19474e-05	Invasive
SLC41A2	1.34217e-05	1.69694e-25	0.000461806	7.26151e-05	3.65243e-05	Invasive
FAM135A	1.33383e-05	0.000124422	0.000736084	0.000206801	5.98014e-05	Invasive
OPA1	1.32986e-05	0.00017333	0.000338483	6.06454e-05	0.000119083	Invasive
CARMIL1	1.32198e-05	0.000128808	0.000732845	0.000209673	0.000152223	Invasive
FUT8	1.32152e-05	8.2643e-19	0.00107296	1.99525e-05	7.32693e-05	Invasive
OGT	1.31356e-05	0.00018539	0.000498536	0.000190617	0.000282113	Invasive
RAPH1	1.31153e-05	1.11701e-05	0.000464446	1.79615e-05	7.62611e-05	Invasive
MEF2A	1.30652e-05	0.000253288	0.000659693	0.000278678	0.000154115	Invasive
NOS1AP	1.29561e-05	1.98981e-25	0.000435098	4.73094e-05	1.48539e-16	Invasive
HBS1L	1.29184e-05	0.000232901	0.000322033	7.64994e-05	4.12263e-05	Invasive
PIP4K2A	1.28293e-05	6.79161e-07	0.000374098	4.36584e-25	8.58743e-05	Invasive
SPTLC2	1.27472e-05	0.000202814	0.000377282	6.39805e-05	0.000177015	Invasive
HELZ	1.27462e-05	2.57742e-05	0.000412525	6.52088e-05	0.000127472	Invasive
PBRM1	1.27041e-05	0.000184389	0.000492354	0.000226503	0.00020796	Invasive
NUDCD3	1.25637e-05	1.7901e-05	0.000301842	0.00026641	0.000134705	Invasive
SIPA1L3	1.24429e-05	3.1328e-06	0.000750707	2.96833e-05	8.09368e-06	Invasive
ZNF644	1.23739e-05	0.000196087	0.000488971	0.000151025	0.000196962	Invasive
MED13	1.21822e-05	0.000173128	0.000591363	0.000137241	0.000256119	Invasive
CREBBP	1.21611e-05	7.62461e-05	0.000433958	5.99955e-05	0.00022337	Invasive
BICD1	1.21589e-05	7.41258e-05	0.000410017	2.35987e-05	2.603e-05	Invasive
RAD9A	1.21063e-05	5.03937e-05	0.000334497	3.39669e-05	7.4115e-05	Invasive
MINDY2	1.18881e-05	5.06199e-05	0.000304283	9.4175e-05	0.000199251	Invasive
SENP5	1.186e-05	0.000126507	0.000391297	0.000223732	6.03486e-05	Invasive
KIF13A	1.17641e-05	0.000219608	0.00067159	6.23138e-05	5.52464e-05	Invasive
SECISBP2L	1.17596e-05	0.000109607	0.00028905	1.39313e-05	0.000185525	Invasive
COG3	1.16939e-05	9.85603e-05	0.000291681	5.95958e-05	8.11244e-05	Invasive
TMPRSS2	1.16603e-05	1.69694e-25	0.000501289	4.28646e-05	0.000240926	Invasive
TRPC4AP	1.15707e-05	3.22335e-05	0.00055821	7.90272e-05	9.47719e-05	Invasive
NHS	1.15265e-05	1.10584e-05	0.000412498	5.87134e-05	2.58801e-05	Invasive
PHACTR2	1.14873e-05	0.000183757	0.000894222	0.000282596	0.000153674	Invasive
KIDINS220	1.14289e-05	0.000160621	0.000444098	7.47683e-05	0.00024335	Invasive
ACACA	1.14119e-05	8.4184e-20	0.000413651	7.78936e-05	2.97584e-05	Invasive
MACF1	1.11082e-05	0.000185008	0.000897315	0.000144463	0.000439746	Invasive
DLGAP4	1.09835e-05	5.03267e-05	0.000397016	0.000123296	0.000148101	Invasive
PPM1B	1.0959e-05	7.00898e-07	0.000413589	9.761e-05	0.000117635	Invasive
USP54	1.09448e-05	1.69694e-25	0.000422484	0.000145832	3.34657e-05	Invasive
MAP4K4	1.09153e-05	0.000161242	0.000529653	1.9601e-05	0.000432889	Invasive
MIB1	1.08986e-05	0.000169791	0.000459649	0.000120878	0.000128179	Invasive
MAPK8	1.08616e-05	3.01001e-05	0.00050505	2.06909e-05	5.24345e-05	Invasive
TSC22D2	1.06935e-05	6.39808e-05	0.000490635	9.37821e-05	0.00022094	Invasive
CTBP2	1.05472e-05	0.000411251	0.000902154	9.04368e-05	0.000137934	Invasive
SPRED2	1.04752e-05	1.69694e-25	0.000491142	2.67095e-10	3.58175e-05	Invasive
VPS13B	1.04436e-05	1.27773e-10	0.000959938	0.000272278	7.34008e-06	Invasive
NPAS2	1.03087e-05	1.69694e-25	0.000510501	2.63598e-05	0.000132915	Invasive
PLEKHA5	1.02147e-05	0.000836845	0.00106595	0.000159542	0.000254141	Invasive
ANKIB1	1.01768e-05	0.000230359	0.000566446	1.53876e-05	0.000335328	Invasive
BMPR1A	1.01316e-05	1.69694e-25	0.000399045	2.05996e-05	8.43964e-06	Invasive
PDSS2	1.01157e-05	3.94657e-05	0.00047151	4.36584e-25	4.80267e-22	Invasive
UVRAG	1.00544e-05	8.76273e-05	0.000486303	3.95828e-05	5.87685e-05	Invasive
OTUD7B	9.94659e-06	0.000140169	0.00033865	0.000277475	3.00101e-05	Invasive
FOXN3	9.89113e-06	8.00479e-24	0.000633613	0.000168967	9.03909e-05	Invasive
FARP2	9.8448e-06	3.8014e-05	0.000468454	9.66449e-05	0.000102032	Invasive
CDK8	9.80089e-06	7.21405e-05	0.00053303	5.15174e-05	1.55572e-25	Invasive
CUL3	9.79967e-06	0.000321436	0.000542155	7.55972e-05	0.000257557	Invasive
ZNF217	9.78385e-06	9.38863e-05	0.000311007	0.000117644	0.000298099	Invasive
NCOA1	9.74214e-06	9.76042e-07	0.000541435	4.36584e-25	4.58542e-05	Invasive
FOXP1	9.69763e-06	0.000214719	0.00109693	0.00050471	0.000488781	Invasive
AP1G1	9.58161e-06	3.79973e-05	0.000276846	0.000153276	0.000185108	Invasive
HIPK3	9.44694e-06	1.76821e-05	0.000340081	0.000114175	0.000113009	Invasive
ELL2	9.43049e-06	3.85989e-05	0.000367778	8.14683e-05	0.000186981	Invasive
HPCAL1	9.40936e-06	2.98615e-06	0.000414838	1.17218e-05	0.000167608	Invasive
ARID1B	9.38533e-06	7.52962e-05	0.000864298	0.000651124	0.000163087	Invasive
RABGAP1	9.34316e-06	0.000153917	0.000479143	7.38898e-05	0.000113772	Invasive
ALCAM	9.24579e-06	0.000162652	0.000447633	4.36584e-25	0.000291359	Invasive
FOXK1	9.18694e-06	1.61071e-05	0.000402426	1.12145e-05	6.40448e-05	Invasive
TMTC2	9.08418e-06	1.69694e-25	0.000635652	6.77886e-06	1.55572e-25	Invasive
SETX	8.96916e-06	0.000392481	0.000528895	1.46806e-05	0.000435398	Invasive
GSK3B	8.86755e-06	9.91045e-05	0.000538201	0.00013883	6.08943e-05	Invasive
GLS	8.85512e-06	0.000229948	0.000560207	0.000484169	0.000237283	Invasive
FOXK2	8.83266e-06	3.004e-05	0.000333665	5.98133e-06	5.83869e-05	Invasive
TRIM33	8.74975e-06	0.00014075	0.000431174	0.000111114	0.000154578	Invasive
KIAA0319L	8.49014e-06	3.93021e-05	0.000400718	0.000104362	0.000162313	Invasive
ADNP	8.48412e-06	0.00021173	0.000609785	4.60499e-06	0.00018683	Invasive
MAPK6	8.42127e-06	0.000123754	0.000324827	0.000305181	0.000257851	Invasive
ELP4	8.34037e-06	1.69694e-25	0.000416856	0.000143575	1.55572e-25	Invasive
UMAD1	8.2386e-06	1.69694e-25	0.000566914	4.23872e-05	3.5037e-05	Invasive
ATG7	8.13218e-06	1.69694e-25	0.000523316	4.76725e-05	1.55572e-25	Invasive
RALGAPA1	8.02644e-06	6.85742e-05	0.000613502	0.00015225	5.23348e-05	Invasive
DIP2B	8.01305e-06	4.51874e-22	0.000730943	0.0001003	2.34509e-05	Invasive
CLOCK	7.97015e-06	6.65376e-05	0.000316785	9.45735e-05	8.95773e-05	Invasive
AKAP10	7.81443e-06	7.63102e-05	0.00035977	4.36584e-25	1.60301e-05	Invasive
FMNL2	7.78419e-06	4.36504e-05	0.000632116	7.58332e-06	0.000111031	Invasive
SIPA1L1	7.7392e-06	1.69694e-25	0.000964006	7.44306e-05	6.77828e-05	Invasive
KDM6A	7.71727e-06	1.69694e-25	0.00062656	2.72312e-05	4.92194e-05	Invasive
FAM13B	7.65922e-06	8.57536e-05	0.000328388	4.6884e-05	0.000103829	Invasive
YIPF4	7.58561e-06	0.000150887	0.000279868	0.000210946	0.000268561	Invasive
RAPGEF5	7.51865e-06	8.94831e-05	0.000398792	0.0001276	7.50304e-05	Invasive
CYTH1	7.36825e-06	4.7346e-05	0.000412728	4.41049e-05	0.000329308	Invasive
PCSK7	7.23041e-06	1.69694e-25	0.000479728	0.000309503	0.000201273	Invasive
SMG1	7.10878e-06	0.000347884	0.000640796	0.000415377	0.000429752	Invasive
CMIP	7.09201e-06	8.01708e-05	0.00075453	2.94878e-05	0.000200966	Invasive
ATP9A	7.08097e-06	1.69694e-25	0.000649208	0.000139737	8.73138e-05	Invasive
CLASP1	6.96476e-06	2.06322e-05	0.000501828	2.95317e-05	1.15141e-06	Invasive
RERE	6.91427e-06	0.000143428	0.000894103	0.000284565	0.000165881	Invasive
RPAP2	6.83379e-06	0.000222167	0.000285102	0.000137162	0.000128189	Invasive
WWP2	6.75222e-06	1.69694e-25	0.000382431	1.34018e-05	6.82149e-05	Invasive
ZZEF1	6.68318e-06	1.14794e-14	0.000355982	0.000112472	0.000101518	Invasive
LRCH3	6.47835e-06	5.08045e-05	0.000386913	4.36584e-25	3.40468e-05	Invasive
PLD1	6.46691e-06	1.84492e-06	0.000392276	0.000110303	7.78166e-05	Invasive
ATR	6.35695e-06	6.89543e-05	0.000375867	8.07471e-05	5.27203e-05	Invasive
REPS1	6.2036e-06	1.31053e-05	0.000410486	3.76396e-06	5.109e-05	Invasive
PLEKHA6	6.16714e-06	1.69694e-25	0.000662651	0.000321727	0.000142487	Invasive
PLXNA2	6.15158e-06	7.04694e-06	0.000473421	9.55716e-05	4.96199e-05	Invasive
PTBP2	6.1239e-06	1.69694e-25	0.000373541	3.11449e-05	5.92488e-05	Invasive
PICALM	6.08739e-06	0.000177073	0.000789152	2.9873e-05	0.00021661	Invasive
COG5	6.05137e-06	1.65236e-05	0.00060401	7.35256e-05	1.74583e-25	Invasive
SCYL2	6.03097e-06	0.00019776	0.000245042	3.86021e-05	9.11154e-05	Invasive
LRCH1	5.99008e-06	5.51423e-08	0.000768903	8.20557e-06	4.70316e-05	Invasive
STRN	5.86374e-06	3.37285e-05	0.000425964	8.65833e-05	5.26438e-05	Invasive
DHX32	5.6813e-06	7.69094e-06	0.000402424	5.49456e-05	0.000108134	Invasive
TNRC6A	5.60756e-06	7.8969e-05	0.000574478	0.00018944	0.000324372	Invasive
ANKHD1	5.56293e-06	1.69694e-25	0.000692297	4.36584e-25	2.54788e-05	Invasive
TAF1	5.49958e-06	0.00010436	0.000261402	5.69654e-05	0.00016612	Invasive
TRIM24	5.37428e-06	0.000195298	0.000307659	0.000204648	7.24128e-05	Invasive
EHBP1	5.10835e-06	0.000269389	0.000819841	4.36584e-25	5.56471e-05	Invasive
AVL9	4.80949e-06	2.40465e-05	0.000495333	6.08892e-05	0.000106859	Invasive
WDR26	4.79324e-06	0.000173603	0.000295867	5.08819e-05	0.000268106	Invasive
MBD5	4.69579e-06	6.40161e-05	0.000788457	0.000114516	4.52696e-22	Invasive
ASXL2	4.65368e-06	0.000128392	0.000511382	9.5938e-05	5.30221e-05	Invasive
MROH1	4.62374e-06	9.31464e-06	0.000541108	0.000267827	7.12005e-05	Invasive
ASH1L	4.61474e-06	0.000465648	0.0009043	0.000444368	0.000527557	Invasive
AHCTF1	4.60973e-06	0.000179763	0.000303509	4.76246e-05	0.0001188	Invasive
TRPM7	4.53046e-06	0.000133208	0.000459361	0.00024636	8.38538e-05	Invasive
REV1	4.52518e-06	7.73693e-05	0.000345431	0.000100866	0.00018205	Invasive
USP24	4.51078e-06	4.74294e-07	0.000387719	4.82553e-05	7.60741e-05	Invasive
UBR3	4.37875e-06	3.16465e-05	0.00044734	5.20429e-06	6.11458e-05	Invasive
USP47	4.29464e-06	0.000442814	0.000625248	8.64861e-05	0.000217738	Invasive
MYO1D	4.24577e-06	7.55014e-05	0.000748951	4.36584e-25	4.82428e-05	Invasive
RALGPS1	4.22111e-06	1.69694e-25	0.000444831	4.92503e-05	2.16333e-06	Invasive
ARHGAP42	4.21246e-06	4.26567e-05	0.000713571	1.18829e-05	3.61012e-05	Invasive
CADPS2	4.15386e-06	8.64906e-05	0.000552407	8.57952e-05	4.17644e-05	Invasive
N4BP1	4.11781e-06	3.77341e-05	0.000375272	0.00016371	8.82587e-05	Invasive
ABR	4.11328e-06	0.000107666	0.000493092	0.000153091	0.000156	Invasive
WASHC4	4.10852e-06	0.000152218	0.000330392	3.45518e-05	0.000129042	Invasive
STIM2	3.95844e-06	0.000108746	0.000252973	0.000246422	0.000128916	Invasive
TBCK	3.81497e-06	1.69694e-25	0.00044768	3.22759e-05	1.55572e-25	Invasive
MARK3	3.80787e-06	0.000266799	0.000613679	7.2795e-05	0.000327609	Invasive
RUNX1	3.75565e-06	3.55106e-05	0.000618631	0.000111255	8.17072e-05	Invasive
TCF20	3.72298e-06	6.32796e-06	0.000393346	3.41198e-05	6.62185e-05	Invasive
DNAJC13	3.58687e-06	7.02896e-05	0.000306385	7.85581e-05	0.000154904	Invasive
ARFGEF2	3.54643e-06	0.000161104	0.000574822	9.10507e-05	0.000104281	Invasive
LGR4	3.53943e-06	1.7389e-25	0.000732094	0.000215979	0.000125156	Invasive
FNDC3A	3.5304e-06	0.000186279	0.0006028	3.66145e-05	0.000245853	Invasive
TMEM131	3.33468e-06	3.85835e-06	0.000604289	3.01835e-05	0.000214972	Invasive
TANC1	3.25165e-06	3.55774e-05	0.000536508	3.59304e-05	6.38672e-05	Invasive
NPLOC4	3.22204e-06	7.98166e-05	0.00036521	9.01101e-05	0.000138648	Invasive
ARID2	3.19577e-06	5.44066e-05	0.000611737	2.98219e-05	3.88326e-05	Invasive
NBAS	3.02529e-06	1.88944e-05	0.000594765	6.47723e-05	6.16765e-05	Invasive
PIP5K1A	2.98019e-06	8.60396e-05	0.000300729	0.000253885	0.000166035	Invasive
ZHX2	2.91641e-06	1.69694e-25	0.000452797	1.14909e-05	1.85894e-05	Invasive
KIAA1671	2.7889e-06	1.69694e-25	0.000499513	5.73809e-05	2.67854e-05	Invasive
FRK	2.72702e-06	1.69694e-25	0.000424994	4.70907e-05	3.53678e-05	Invasive
ZMYM4	2.63561e-06	0.00015611	0.000398743	0.00010082	5.24625e-05	Invasive
JMJD1C	2.63041e-06	0.000774751	0.00108322	0.000384033	0.000914975	Invasive
ADAM17	2.56706e-06	9.58295e-05	0.000410211	3.39732e-05	8.75588e-05	Invasive
ZNF83	2.55845e-06	0.000108542	0.000554633	7.5099e-05	7.92002e-05	Invasive
CCDC14	2.52629e-06	0.000300023	0.000301084	0.00023075	0.000167004	Invasive
KMT2C	2.52241e-06	0.000235472	0.000861175	0.000456234	0.000348574	Invasive
PIBF1	2.47061e-06	0.000227284	0.000613576	0.000198173	7.32795e-05	Invasive
PRKCA	2.44649e-06	4.10426e-12	0.000879735	0.000217029	6.5995e-05	Invasive
DLG1	2.38058e-06	0.000110274	0.000929044	0.000144583	0.000125133	Invasive
GBF1	2.26914e-06	1.31348e-05	0.000428195	5.70386e-05	8.81608e-05	Invasive
LRP6	2.26761e-06	9.90859e-06	0.000346314	0.000163361	4.63771e-05	Invasive
CBFA2T2	2.25202e-06	2.1782e-05	0.000543902	4.9112e-05	9.30304e-05	Invasive
RNF216	2.24413e-06	0.000100246	0.000339157	0.000153417	0.000145305	Invasive
MYSM1	2.24375e-06	9.38106e-05	0.00031589	0.000239821	0.000207843	Invasive
UBR1	2.23726e-06	9.62391e-05	0.000362151	0.000222057	5.5566e-05	Invasive
VTI1A	2.17541e-06	2.78982e-06	0.000744328	0.00021059	5.41842e-05	Invasive
SUMF1	2.16833e-06	5.21235e-07	0.000391817	4.36584e-25	4.16119e-05	Invasive
KIAA0232	2.1288e-06	0.000114374	0.000451307	0.000167383	0.000118631	Invasive
SLC22A23	2.03909e-06	1.69694e-25	0.000608698	3.73813e-05	2.62009e-05	Invasive
UBR2	2.00088e-06	7.81742e-05	0.000612974	0.000115741	0.000161526	Invasive
ZDHHC14	1.9976e-06	2.64425e-05	0.000440714	1.08568e-05	6.50003e-06	Invasive
CLASP2	1.97661e-06	3.13148e-05	0.000450178	9.55238e-05	6.18955e-05	Invasive
BCAS1	1.87074e-06	1.69694e-25	0.00059917	0.000208018	0.000520508	Invasive
SNX13	1.76204e-06	0.000113261	0.000400376	0.000148684	0.000120107	Invasive
TET3	1.76117e-06	1.07431e-05	0.000355192	4.33982e-05	6.45268e-05	Invasive
ADGRG6	1.7004e-06	1.51714e-05	0.000392297	3.53048e-05	9.21939e-05	Invasive
ANK3	1.66463e-06	8.79396e-05	0.000634326	7.51469e-05	6.40329e-05	Invasive
R3HDM2	1.52787e-06	0.000323175	0.000572148	0.000361065	7.9783e-05	Invasive
CHD8	1.51083e-06	0.000269455	0.000301456	2.87327e-05	0.00021959	Invasive
PSME4	1.46897e-06	0.000195291	0.000507577	6.03234e-05	0.000270808	Invasive
SP3	1.46667e-06	0.000107356	0.00039199	0.000113469	7.75303e-05	Invasive
TNRC6B	1.31972e-06	4.42154e-05	0.000630354	0.000546295	0.000366965	Invasive
KIAA1217	1.3176e-06	9.63098e-05	0.000712532	0.000233972	0.000189245	Invasive
SAMD5	1.22531e-06	0.000161176	0.000507455	0.000146777	8.64395e-05	Invasive
SYNRG	1.14529e-06	0.000134816	0.00025045	5.24296e-05	0.000153931	Invasive
PTPRG	1.13382e-06	1.7098e-08	0.000698999	4.36584e-25	8.37081e-16	Invasive
CDK5RAP2	1.09313e-06	0.000264881	0.000276732	9.5505e-05	0.000206602	Invasive
ZNF609	1.05867e-06	3.53619e-07	0.000642846	0.000113304	9.46246e-05	Invasive
COBLL1	9.55364e-07	7.27044e-05	0.000483899	0.000104674	0.000124938	Invasive
RELCH	8.70395e-07	0.000110236	0.000404912	4.36584e-25	4.42014e-05	Invasive
SCAF8	8.41337e-07	0.000103949	0.000377683	5.61167e-05	5.8154e-05	Invasive
GALNT5	8.31212e-07	1.69694e-25	0.000424145	6.80074e-06	0.00032402	Invasive
JARID2	8.08355e-07	8.03922e-05	0.000447318	6.94665e-05	1.39184e-05	Invasive
EEA1	6.98949e-07	0.000332944	0.000414213	4.00925e-05	0.000252239	Invasive
NBEAL1	6.75492e-07	0.000501922	0.000793738	0.000180782	0.000126847	Invasive
LCOR	6.28438e-07	0.00015152	0.000590296	0.000447909	0.000250986	Invasive
MBOAT2	5.95634e-07	1.69694e-25	0.000480571	1.72799e-05	0.000274738	Invasive
TNS3	5.87644e-07	5.66648e-05	0.000643639	9.72893e-05	6.27517e-08	Invasive
PACS1	5.86594e-07	2.5298e-05	0.000571598	1.25878e-05	7.99669e-06	Invasive
MYCBP2	5.73741e-07	0.000282608	0.000498307	0.000282727	0.000210272	Invasive
SCAPER	5.16146e-07	0.000148723	0.000429248	0.000124776	0.000170227	Invasive
RANBP9	4.8539e-07	4.79159e-05	0.000320234	6.90908e-05	7.98454e-05	Invasive
CACUL1	4.61588e-07	3.93057e-05	0.000240681	3.08394e-05	0.000209307	Invasive
LRBA	4.61572e-07	2.91164e-06	0.000983009	0.000304768	4.32735e-05	Invasive
SLC7A11	4.56334e-07	4.77471e-05	0.000341524	1.07039e-05	0.000200499	Invasive
DENND4A	4.22697e-07	5.41001e-05	0.000400247	9.37714e-05	2.93383e-05	Invasive
SIK3	4.20425e-07	1.69694e-25	0.000598195	7.16929e-05	2.81738e-05	Invasive
RALGAPB	4.12412e-07	3.31708e-07	0.000474543	0.000137328	0.000115338	Invasive
CABIN1	3.25357e-07	9.78273e-05	0.000377074	0.000132294	1.68483e-05	Invasive
CDK13	3.03036e-07	0.000256681	0.000609401	0.00030938	0.000375822	Invasive
HIVEP1	2.82637e-07	5.55625e-06	0.000380794	0.000187725	0.00010742	Invasive
AFDN	2.5864e-07	0.000357234	0.000664592	0.000418867	0.00056894	Invasive
PPP1R12B	2.38463e-07	2.21744e-06	0.000501716	0.00012354	9.95071e-05	Invasive
KIF1B	2.21827e-07	0.000112572	0.000317286	4.72474e-05	0.000142235	Invasive
INSR	1.59656e-07	2.7536e-12	0.000517987	7.00698e-05	0.000281965	Invasive
NCOA3	1.56667e-07	0.000141723	0.000698061	3.12696e-05	2.44598e-05	Invasive
ZBTB20	1.527e-07	4.04662e-07	0.00103508	0.000203884	6.60927e-05	Invasive
IGF2BP2	1.49163e-07	4.38646e-05	0.000864172	0.000120273	0.000230185	Invasive
DENND1A	1.48841e-07	1.03033e-07	0.00067224	4.70685e-05	5.69948e-23	Invasive
DIAPH1	1.43218e-07	0.000188184	0.000467751	8.75257e-05	0.00021475	Invasive
EPB41L1	1.05759e-07	7.96412e-05	0.000701469	0.000156653	0.000134647	Invasive
AKAP11	1.04599e-07	0.000202256	0.000229598	0.000115554	0.000193522	Invasive
MBNL2	9.13942e-08	0.000260919	0.000755298	0.000303149	0.000222168	Invasive
EFNB2	8.76234e-08	0.000235241	0.000555426	0.000255766	0.000490925	Invasive
ATXN1	8.65554e-08	2.67427e-08	0.000754603	3.72075e-05	7.51484e-05	Invasive
CDKAL1	8.14151e-08	1.98106e-06	0.000709248	3.5452e-06	1.60187e-06	Invasive
PDE8A	7.9062e-08	8.86231e-05	0.000520909	6.20866e-05	5.15012e-05	Invasive
CHD2	7.79887e-08	0.000339126	0.000918601	0.000421471	0.000876372	Invasive
ZFC3H1	7.5736e-08	0.000124042	0.000634707	0.00036446	0.00047029	Invasive
ARHGEF3	7.28363e-08	8.08123e-05	0.000545993	4.36584e-25	1.89438e-05	Invasive
CAMK2D	7.23315e-08	0.000103656	0.00069579	4.36584e-25	0.000104101	Invasive
WDFY3	6.84227e-08	1.69694e-25	0.000396676	2.16524e-05	1.76923e-05	Invasive
TNPO3	6.43134e-08	0.000208738	0.000297368	0.000129576	8.91939e-05	Invasive
DIP2A	5.66821e-08	3.45307e-05	0.00032136	8.16726e-05	0.000201642	Invasive
GPR39	4.22507e-08	1.69694e-25	0.000561504	4.36584e-25	1.55572e-25	Invasive
MAN2A1	3.98987e-08	7.37041e-05	0.000329866	8.28224e-05	0.000150783	Invasive
ZFHX3	3.14015e-08	0.000113492	0.000462055	5.19249e-05	7.02331e-05	Invasive
SREBF2	2.5232e-08	5.04347e-05	0.000498282	5.42466e-05	0.00015034	Invasive
FOXO3	2.3331e-08	0.000296251	0.000808276	4.94278e-06	0.000105272	Invasive
MLXIP	2.13101e-08	7.30551e-05	0.000352041	6.43567e-05	0.000201717	Invasive
RBM6	1.65848e-08	0.000202194	0.000811656	0.00025024	0.000473294	Invasive
SCLT1	1.64286e-08	0.000158452	0.000386022	0.000144473	4.08985e-05	Invasive
ARHGAP32	1.62753e-08	1.69694e-25	0.000723871	0.000183736	8.28024e-05	Invasive
TCF12	1.46748e-08	0.000322515	0.000928668	8.66257e-05	7.9667e-05	Invasive
SPATS2	1.33549e-08	0.000103684	0.000407027	7.78478e-05	7.23644e-05	Invasive
ATP11B	1.12616e-08	2.62171e-05	0.000556334	6.99537e-05	0.000151738	Invasive
TMCC1	6.73259e-09	1.69694e-25	0.000522365	2.88791e-06	1.62291e-06	Invasive
RAD51B	6.53944e-09	1.69694e-25	0.000707939	1.11208e-05	1.55572e-25	Invasive
FNIP2	5.92074e-09	4.02206e-05	0.000416962	5.09046e-06	0.000138899	Invasive
MAST2	1.8527e-09	6.6756e-08	0.000378823	3.52967e-05	8.4069e-05	Invasive
MYRF	1.21734e-09	1.69694e-25	0.000293051	2.54725e-05	0.000290221	Invasive
VPS53	9.57425e-10	4.78815e-09	0.000416649	0.000217147	0.000188885	Invasive
DMXL1	7.66048e-10	2.0621e-14	0.000381754	2.71186e-05	8.32843e-05	Invasive
TNKS	4.9105e-10	6.65469e-05	0.000469709	0.000108947	5.46234e-05	Invasive
NUMB	4.90422e-10	0.000115773	0.000694434	0.000281275	8.1356e-05	Invasive
LHFPL2	1.82902e-10	1.36832e-05	0.000387361	2.31919e-05	7.82478e-06	Invasive
FBXL17	9.71877e-11	1.69694e-25	0.000575789	2.30799e-05	2.11365e-05	Invasive
RAI14	8.31189e-11	0.000177498	0.000325709	4.36584e-25	9.37407e-05	Invasive
TNKS2	5.04636e-11	0.000157169	0.000330332	0.000135856	6.71113e-05	Invasive
VPS54	1.93138e-11	0.000119847	0.000376898	2.42223e-05	5.03844e-05	Invasive
NAB1	9.42916e-12	0.000153901	0.000280554	4.56596e-06	0.000227824	Invasive
KDM2A	5.81799e-12	0.000139847	0.000730618	0.000167587	0.000176355	Invasive
MED13L	4.81585e-12	0.000138501	0.000932601	3.25414e-05	0.000101598	Invasive
EEPD1	3.93731e-12	1.69694e-25	0.00042723	2.03125e-05	0.000131663	Invasive
EPB41L5	2.47096e-12	4.47309e-05	0.000343925	0.000132602	5.88044e-05	Invasive
ARHGEF12	1.78855e-12	0.000214672	0.000607506	8.54534e-05	0.000198047	Invasive
THADA	3.05019e-13	4.56408e-05	0.000424154	6.42585e-05	2.84861e-05	Invasive
MTHFD1L	2.19605e-13	6.76077e-05	0.000400061	3.62944e-05	4.31512e-05	Invasive
DDX60L	1.86104e-13	1.69694e-25	0.000426337	5.40344e-05	8.62357e-05	Invasive
NFIA	1.25807e-13	0.000133903	0.00070064	0.000102687	8.31224e-05	Invasive
PAN3	9.1698e-14	5.1607e-05	0.000813824	4.59224e-06	7.44592e-05	Invasive
EPB41	7.54932e-14	0.000249164	0.00035138	0.000180553	0.000173268	Invasive
SYTL2	5.3544e-14	7.78643e-10	0.000815175	0.000231299	0.00050821	Invasive
ZMIZ2	1.41354e-14	2.8869e-21	0.000318592	4.77073e-05	0.00019727	Invasive
EXOC4	9.57111e-15	4.76215e-05	0.000876598	0.000229147	1.78833e-05	Invasive
BRWD1	9.10214e-15	0.000251747	0.000604277	2.88642e-05	0.000337865	Invasive
ATP10B	1.69533e-15	5.50886e-06	0.000366625	0.000113959	0.000228136	Invasive
AAK1	1.68646e-15	1.8496e-05	0.00057673	0.000359391	0.00016535	Invasive
DOCK1	1.64424e-15	3.93278e-06	0.000798723	0.00011354	0.000127673	Invasive
INO80D	5.35042e-16	0.000126598	0.000327302	0.000185389	0.000146288	Invasive
POU2F1	1.54155e-16	7.95055e-05	0.000407248	4.08899e-05	7.49638e-05	Invasive
EPN2	8.21972e-17	0.000124129	0.000363942	0.000134103	2.49779e-05	Invasive
GRAMD2B	3.06772e-17	1.69694e-25	0.000424631	2.48464e-06	8.09057e-05	Invasive
PHACTR4	1.95529e-17	0.000112262	0.000428253	0.000218354	0.000184824	Invasive
TBC1D8	8.94227e-18	1.69694e-25	0.000489991	4.36584e-25	0.000136471	Invasive
ANKRD28	6.97396e-18	6.99873e-05	0.000401596	6.70603e-05	8.74523e-05	Invasive
URGCP	4.08075e-18	1.69694e-25	0.000334429	5.86898e-05	8.27961e-05	Invasive
C2CD5	1.39348e-18	0.000251097	0.000341309	2.15169e-05	1.70127e-05	Invasive
ARHGEF7	1.1276e-18	1.44809e-05	0.000477011	6.36923e-05	0.000162382	Invasive
FARP1	1.03202e-18	0.000204061	0.000447574	8.8497e-06	7.18385e-05	Invasive
FAF1	6.59988e-19	0.000133817	0.000715818	8.91842e-06	1.55572e-25	Invasive
EGFR	6.13288e-19	0.000229465	0.000703841	3.81101e-05	6.2762e-05	Invasive
RAP1GAP2	4.71131e-19	1.69694e-25	0.000435274	1.7545e-05	8.50849e-05	Invasive
MYO9A	1.89163e-19	1.81792e-09	0.000477525	0.000151254	9.34087e-05	Invasive
ADAM28	1.61504e-19	1.69694e-25	0.000456798	0.00013294	0.000290982	Invasive
CBLB	1.35938e-19	1.69694e-25	0.000756182	4.58447e-05	9.21314e-05	Invasive
MRTFB	8.57547e-20	1.69694e-25	0.00043839	4.36584e-25	1.52775e-05	Invasive
XRN1	7.8952e-20	0.000181177	0.000552344	0.000152751	0.000272326	Invasive
NUMA1	6.61629e-20	0.000280419	0.00028184	0.000258569	0.000236027	Invasive
GALNT10	6.20163e-20	1.69694e-25	0.0004644	5.32709e-05	4.68809e-05	Invasive
AGO3	1.86775e-21	0.000105659	0.000371793	2.41811e-05	9.23596e-05	Invasive
CASZ1	1.45067e-21	2.45991e-05	0.000398954	0.000244391	0.000139639	Invasive
VWA8	1.35249e-21	3.49081e-05	0.000516696	6.82354e-05	1.86267e-16	Invasive
CEP192	2.89172e-22	0.000178462	0.000372081	0.000214165	2.48746e-05	Invasive
SH3PXD2A	9.47785e-23	7.10344e-06	0.000429098	9.55949e-05	0.00010175	Invasive
OSBPL1A	2.65814e-23	0.00020493	0.000320037	0.000208657	7.90327e-05	Invasive
BMPR2	2.50758e-23	9.48203e-05	0.000640557	4.36584e-25	4.71184e-05	Invasive
FAM193A	1.54255e-23	3.41157e-05	0.000336457	1.68335e-05	0.000113494	Invasive
DYM	3.82476e-24	4.21952e-05	0.000502749	7.15158e-05	2.47429e-10	Invasive
LMTK2	2.36319e-24	3.98198e-05	0.000381872	2.43487e-05	0.000109534	Invasive
HERC4	1.29778e-24	3.245e-05	0.000796399	0.000197631	9.5867e-05	Invasive
ATM	1.04888e-24	9.28246e-05	0.000285169	4.76588e-05	0.000181156	Invasive
PPP3R1	3.10853e-25	6.71639e-05	0.000428442	4.74339e-08	0.000113091	Invasive
KANSL1	2.23162e-25	1.69694e-25	0.000990845	0.000538722	0.000124673	Invasive
PHIP	1.48216e-25	0.000607755	0.000653227	0.000255402	0.000579688	Invasive
ETNK1	1.48216e-25	0.000485577	0.000683524	0.000405051	0.000372036	Invasive
HUWE1	1.48216e-25	0.000305283	0.000475273	0.000122087	0.000202282	Invasive
EP300	1.48216e-25	0.000283829	0.000391368	6.36403e-05	0.000290019	Invasive
MPRIP	1.48216e-25	0.000283485	0.000667612	0.00013832	0.000266172	Invasive
KAT6B	1.48216e-25	0.000263685	0.000474721	0.000410708	0.000230427	Invasive
REV3L	1.48216e-25	0.000260358	0.000503167	5.53696e-05	0.000204683	Invasive
ZMYM2	1.48216e-25	0.000255475	0.000742631	0.000411757	0.000277226	Invasive
PRRC2B	1.48216e-25	0.000206488	0.000472531	0.000112586	0.000231856	Invasive
ANKRD26	1.48216e-25	0.000197724	0.000246038	0.000243099	0.000221325	Invasive
GOLGA8A	1.48216e-25	0.000192406	0.000404549	0.000320318	0.000395529	Invasive
CHD6	1.48216e-25	0.000189575	0.000429117	0.000349908	0.000281454	Invasive
BRAF	1.48216e-25	0.000176185	0.000446786	0.000148647	4.64784e-05	Invasive
CDC42BPA	1.48216e-25	0.000166072	0.00114647	0.000286159	0.000515259	Invasive
CHD9	1.48216e-25	0.000154599	0.00069821	0.000150526	0.000506207	Invasive
ZNF518A	1.48216e-25	0.000140692	0.000503694	0.00016074	0.000215459	Invasive
MDN1	1.48216e-25	0.00013875	0.000305612	0.000128539	0.000136116	Invasive
HIPK2	1.48216e-25	0.000120343	0.000405483	4.02432e-05	0.000137234	Invasive
ARHGAP26	1.48216e-25	0.000113616	0.000799488	0.000212418	0.000259854	Invasive
UTRN	1.48216e-25	0.000110877	0.000669297	4.36584e-25	0.000363412	Invasive
DYRK1A	1.48216e-25	0.000107593	0.0005545	4.57515e-05	6.83229e-05	Invasive
ARFGEF3	1.48216e-25	0.000100047	0.000507987	0.00021255	0.000191846	Invasive
MIPOL1	1.48216e-25	9.35457e-05	0.000412073	4.98572e-05	4.24496e-05	Invasive
ZMIZ1	1.48216e-25	9.05271e-05	0.000390489	6.88289e-05	3.26832e-05	Invasive
ABI2	1.48216e-25	8.86857e-05	0.000319383	4.31343e-05	8.00887e-05	Invasive
AHR	1.48216e-25	8.62345e-05	0.000415705	0.000114345	0.000393251	Invasive
CCNT2	1.48216e-25	8.06322e-05	0.000344349	0.000144295	0.000203832	Invasive
ARID1A	1.48216e-25	7.97532e-05	0.00036061	0.000168359	0.000165958	Invasive
SPATA13	1.48216e-25	6.94748e-05	0.00056046	0.000143321	0.000145414	Invasive
NFAT5	1.48216e-25	6.93103e-05	0.000935927	8.06876e-05	7.91703e-05	Invasive
PTPRE	1.48216e-25	6.41535e-05	0.000317499	7.28674e-05	0.00013043	Invasive
PCNX1	1.48216e-25	5.94535e-05	0.000373056	1.01479e-05	2.06294e-05	Invasive
ITPR2	1.48216e-25	5.88118e-05	0.000464489	0.000131234	0.000102181	Invasive
PCCA	1.48216e-25	5.63286e-05	0.000652316	1.55941e-05	1.29114e-05	Invasive
TNRC18	1.48216e-25	5.49147e-05	0.000543339	0.000102409	0.000118085	Invasive
MGAT5	1.48216e-25	5.05157e-05	0.000849383	2.61271e-05	3.83566e-05	Invasive
FOCAD	1.48216e-25	4.92019e-05	0.000444187	1.61783e-05	2.30222e-05	Invasive
DOCK7	1.48216e-25	4.87997e-05	0.000431415	2.78092e-05	6.13901e-05	Invasive
ATAD2B	1.48216e-25	4.84139e-05	0.000509246	6.81906e-05	0.000142141	Invasive
PLCB1	1.48216e-25	4.65965e-05	0.000510969	2.79377e-05	0.000128773	Invasive
ARHGEF10L	1.48216e-25	4.59818e-05	0.000343991	7.91802e-05	0.000179453	Invasive
MAGI3	1.48216e-25	4.33644e-05	0.000820578	0.000103	9.66459e-05	Invasive
SMURF2	1.48216e-25	4.32868e-05	0.000381886	1.61321e-05	4.81697e-05	Invasive
RALGAPA2	1.48216e-25	4.29701e-05	0.000789528	0.000157007	0.000143717	Invasive
CARD11	1.48216e-25	4.14783e-05	0.000452158	4.36584e-25	1.06591e-16	Invasive
ERC1	1.48216e-25	3.94906e-05	0.000714182	8.13175e-05	8.24368e-05	Invasive
TRIO	1.48216e-25	3.71837e-05	0.000849771	2.37107e-05	5.89969e-05	Invasive
FER	1.48216e-25	3.24377e-05	0.000438131	7.2081e-06	8.92918e-05	Invasive
PPP1R13B	1.48216e-25	3.21652e-05	0.000419542	0.000100627	8.30946e-05	Invasive
DENND5B	1.48216e-25	2.97012e-05	0.000505865	4.36584e-25	1.87262e-05	Invasive
IGF1R	1.48216e-25	2.92685e-05	0.000688674	1.73652e-05	6.23673e-18	Invasive
COL27A1	1.48216e-25	2.77261e-05	0.000338881	0.000151974	0.000195486	Invasive
AMBRA1	1.48216e-25	2.60672e-05	0.000448031	4.36584e-25	1.55572e-25	Invasive
SMG6	1.48216e-25	2.49443e-05	0.000420553	0.000208889	8.32847e-05	Invasive
PCSK5	1.48216e-25	2.4815e-05	0.000399916	0.000137334	1.6791e-05	Invasive
PELI2	1.48216e-25	1.99507e-05	0.000679742	1.17455e-05	5.56749e-05	Invasive
GAREM1	1.48216e-25	1.66078e-05	0.000425459	8.68515e-05	7.52224e-05	Invasive
TEAD1	1.48216e-25	1.48889e-05	0.000672959	2.12334e-05	6.25048e-05	Invasive
WWOX	1.48216e-25	1.37286e-05	0.000575523	4.37598e-05	1.55572e-25	Invasive
RASEF	1.48216e-25	1.27603e-05	0.000450921	0.000146185	0.000329618	Invasive
PRKCE	1.48216e-25	1.20405e-05	0.000530362	3.5006e-05	1.55572e-25	Invasive
VPS13D	1.48216e-25	1.17047e-05	0.000590615	0.000114285	2.95467e-05	Invasive
PBX1	1.48216e-25	9.74594e-06	0.000428096	0.000127601	5.46063e-05	Invasive
SBF2	1.48216e-25	4.96508e-06	0.000809381	0.000130227	4.52836e-05	Invasive
PEAK1	1.48216e-25	4.79391e-06	0.000476052	0.000288602	8.34255e-05	Invasive
ATXN7L1	1.48216e-25	4.49756e-06	0.000449323	4.39409e-05	1.55572e-25	Invasive
DGKH	1.48216e-25	1.70962e-06	0.000629212	0.000348829	0.000305148	Invasive
HECTD4	1.48216e-25	5.90646e-07	0.000515403	9.6245e-05	5.59297e-05	Invasive
CHRM3	1.48216e-25	1.50935e-10	0.000504563	2.57685e-05	1.66302e-05	Invasive
HERC1	1.48216e-25	6.03031e-12	0.000515236	0.000135648	9.43045e-05	Invasive
RAPGEF2	1.48216e-25	1.56686e-13	0.000615359	5.27598e-05	5.91865e-05	Invasive
GRB10	1.48216e-25	1.24893e-15	0.000455899	1.00576e-05	4.53486e-05	Invasive
FAM120B	1.48216e-25	2.81292e-19	0.00041157	3.37557e-05	1.71814e-05	Invasive
ARHGEF28	1.48216e-25	1.39384e-23	0.000556762	0.000125683	4.27872e-05	Invasive
MAGI1	1.48216e-25	1.69694e-25	0.0012969	0.000180698	0.000217274	Invasive
PARD3B	1.48216e-25	1.69694e-25	0.000967173	1.74805e-06	4.58909e-07	Invasive
TRAPPC9	1.48216e-25	1.69694e-25	0.000931748	4.64487e-05	1.55572e-25	Invasive
PTPRN2	1.48216e-25	1.69694e-25	0.000896454	9.85494e-15	1.55572e-25	Invasive
CCSER1	1.48216e-25	1.69694e-25	0.000873005	0.000228226	1.55572e-25	Invasive
GPHN	1.48216e-25	1.69694e-25	0.000861394	4.36584e-25	1.55572e-25	Invasive
MAML2	1.48216e-25	1.69694e-25	0.000847133	4.36584e-25	1.55572e-25	Invasive
EXOC6B	1.48216e-25	1.69694e-25	0.00083278	4.36584e-25	1.55572e-25	Invasive
ZSWIM6	1.48216e-25	1.69694e-25	0.000819261	5.02928e-05	7.4172e-05	Invasive
NEBL	1.48216e-25	1.69694e-25	0.000758208	3.70416e-05	9.6308e-05	Invasive
FRMD5	1.48216e-25	1.69694e-25	0.000750127	4.36584e-25	1.55572e-25	Invasive
CAMKMT	1.48216e-25	1.69694e-25	0.000714735	4.75807e-05	1.55572e-25	Invasive
TMEM117	1.48216e-25	1.69694e-25	0.00069873	7.41293e-05	1.55572e-25	Invasive
FHIT	1.48216e-25	1.69694e-25	0.000696381	4.36584e-25	1.55572e-25	Invasive
SMURF1	1.48216e-25	1.69694e-25	0.000688514	3.7614e-05	0.000207098	Invasive
B4GALNT3	1.48216e-25	1.69694e-25	0.000676831	3.97171e-05	1.56288e-05	Invasive
NAALADL2	1.48216e-25	1.69694e-25	0.00066297	2.12069e-05	1.55572e-25	Invasive
ARL15	1.48216e-25	1.69694e-25	0.000633762	9.96575e-06	1.55572e-25	Invasive
LARGE1	1.48216e-25	1.69694e-25	0.000608624	1.69371e-05	1.55572e-25	Invasive
MAML3	1.48216e-25	1.69694e-25	0.000599246	0.000157069	1.55572e-25	Invasive
BTBD9	1.48216e-25	1.69694e-25	0.000583387	5.11453e-05	1.55572e-25	Invasive
THRB	1.48216e-25	1.69694e-25	0.000582683	3.95951e-05	7.23421e-06	Invasive
SEPTIN9	1.48216e-25	1.69694e-25	0.00058178	4.36584e-25	1.55572e-25	Invasive
MRTFA	1.48216e-25	1.69694e-25	0.000572345	4.36584e-25	4.01298e-06	Invasive
FER1L6	1.48216e-25	1.69694e-25	0.000536207	4.36584e-25	4.47287e-05	Invasive
ZNF407	1.48216e-25	1.69694e-25	0.000531783	0.000250891	3.96749e-06	Invasive
SHANK2	1.48216e-25	1.69694e-25	0.000516808	2.83331e-05	1.55572e-25	Invasive
AOPEP	1.48216e-25	1.69694e-25	0.000514472	4.36584e-25	1.55572e-25	Invasive
FBXL20	1.48216e-25	1.69694e-25	0.000497508	8.18301e-05	2.34253e-05	Invasive
SCMH1	1.48216e-25	1.69694e-25	0.000459786	4.36584e-25	1.55572e-25	Invasive
DAPK1	1.48216e-25	1.69694e-25	0.00043105	8.46364e-05	5.12254e-05	Invasive
SLC22A3	1.48216e-25	1.69694e-25	0.000428608	4.36584e-25	1.55572e-25	Invasive
TBC1D32	1.48216e-25	1.69694e-25	0.000428531	6.80837e-05	3.64893e-05	Invasive
DOCK9	1.48216e-25	1.69694e-25	0.000422436	1.47363e-05	2.9185e-08	Invasive
HSPG2	1.48216e-25	1.69694e-25	0.000418672	0.000250838	1.55572e-25	Invasive
PHLPP1	1.48216e-25	1.69694e-25	0.000396255	0.000158257	1.55572e-25	Invasive
GALNT6	1.48216e-25	1.69694e-25	0.000286888	4.91964e-05	0.000247862	Invasive
PABPC1	0.00853568	0.0198262	0.00020236	0.000246611	0.00118881	Proliferative
TPT1	0.00836278	0.0137332	1.47968e-25	0.00674119	0.00404873	Proliferative
PTMA	0.00744572	0.0105552	4.11963e-05	0.00517908	0.00216527	Proliferative
RACK1	0.00335909	0.00403405	1.49635e-05	0.000354993	0.00102143	Proliferative
PSMA7	0.00252055	0.00313386	3.86098e-05	7.70365e-06	5.08711e-06	Proliferative
YWHAB	0.00204314	0.002705	0.000222181	0.000283759	0.000970581	Proliferative
TPM3	0.00202697	0.00337331	0.000219121	0.000464808	0.000747714	Proliferative
CHCHD2	0.00198368	0.00233822	3.6116e-06	0.000328132	0.000105182	Proliferative
UQCRB	0.00192684	0.00383232	1.47968e-25	0.000611604	6.00352e-10	Proliferative
CALM1	0.00191303	0.00277569	6.08485e-05	0.000728633	0.000688193	Proliferative
CALM2	0.00178796	0.00286286	0.000331726	0.000486477	0.000810081	Proliferative
SNRPD2	0.0017654	0.001852	1.47968e-25	0.000487767	1.51909e-10	Proliferative
EEF1B2	0.00172547	0.00217231	2.96607e-05	0.0020716	0.000178662	Proliferative
NPM1	0.00167059	0.00272818	0.000131985	0.000312985	9.9628e-05	Proliferative
HNRNPA2B1	0.00156598	0.00523157	0.000368979	0.00237384	0.00186496	Proliferative
DNAJA1	0.00142676	0.00611738	1.47968e-25	0.000269496	0.00245077	Proliferative
CD24	0.00142246	0.00331258	0.000193662	0.000212267	0.00115092	Proliferative
YBX1	0.00141487	0.00376764	3.3483e-05	0.000577018	1.55572e-25	Proliferative
SLC25A5	0.00137988	0.00208677	1.47968e-25	5.82283e-05	1.55572e-25	Proliferative
NCL	0.00137028	0.00890821	7.29863e-07	0.000187487	0.00239459	Proliferative
ARPC2	0.0012569	0.00136118	0.000355353	5.62016e-06	0.000474842	Proliferative
EEF2	0.0012485	0.00219168	7.25005e-05	0.000676316	0.000881246	Proliferative
SERBP1	0.00119008	0.00343394	0.000169377	0.000515847	0.000155543	Proliferative
SOD1	0.00115501	0.00165976	3.52833e-08	0.000393609	0.000402406	Proliferative
HMGA1	0.00113331	0.00119653	2.14556e-05	0.000130174	0.00072796	Proliferative
EIF2S2	0.00101607	0.00192493	0.000281347	0.000436824	4.94643e-05	Proliferative
SLC25A3	0.00100135	0.00101571	0.000107514	0.000450208	0.000535642	Proliferative
ROMO1	0.00100071	0.00104553	1.47968e-25	0.00084384	0.000277675	Proliferative
SRP14	0.000969338	0.00157885	3.83676e-08	0.00117664	0.000421328	Proliferative
SET	0.000957145	0.00225108	0.000114325	0.000207486	5.17073e-07	Proliferative
EIF3H	0.00095289	0.00146595	0.000356286	2.08278e-05	2.00999e-05	Proliferative
CYCS	0.000925149	0.00171399	2.38708e-06	0.000902144	0.000429656	Proliferative
HDGF	0.000903141	0.00128872	0.000152182	5.35368e-05	0.000347943	Proliferative
PSMA4	0.000900395	0.000943547	5.44878e-05	3.01937e-18	8.45094e-05	Proliferative
TOMM20	0.000869902	0.00094334	5.46815e-05	0.000137908	0.000145924	Proliferative
SNRPF	0.000833231	0.000838884	1.32219e-05	4.35289e-05	1.55572e-25	Proliferative
PDIA6	0.000828167	0.000969417	0.00035474	4.45433e-05	0.000373395	Proliferative
PEBP1	0.000821142	0.00171215	1.23806e-05	6.07364e-06	3.94136e-05	Proliferative
COMMD6	0.000801229	0.000967189	3.95689e-06	0.000146838	0.000175681	Proliferative
PPA1	0.000793837	0.00105195	0.000205042	0.00044884	1.24304e-18	Proliferative
MORF4L1	0.000772824	0.000882294	0.000184105	3.56396e-05	0.000290088	Proliferative
NAP1L1	0.000770675	0.00240613	0.000134988	2.93943e-20	0.00013761	Proliferative
RAD21	0.000741773	0.00157285	0.00022558	1.91224e-05	0.000174831	Proliferative
ANP32B	0.000739609	0.00169437	9.19054e-05	6.20839e-06	0.000434487	Proliferative
NDUFB1	0.000729997	0.000739241	2.14992e-05	0.000727348	0.000234217	Proliferative
RSL1D1	0.0007275	0.00263891	7.36124e-08	4.36584e-25	0.000214156	Proliferative
RBM3	0.000723825	0.00074561	0.000213993	4.4665e-05	0.000494754	Proliferative
SNRPD1	0.000719979	0.00107114	5.69724e-05	0.000248082	2.12403e-05	Proliferative
SNRPB	0.000707559	0.000745834	9.66579e-05	4.33796e-05	9.2404e-05	Proliferative
HNRNPC	0.00070662	0.0017972	0.000549709	4.40187e-05	0.000166257	Proliferative
EIF3E	0.00069774	0.000960108	0.000293898	6.70736e-05	2.16535e-05	Proliferative
ENY2	0.000695389	0.000837294	6.10812e-05	0.000269145	1.27402e-05	Proliferative
CNBP	0.000670303	0.000844272	0.000111345	4.16483e-05	0.000212068	Proliferative
SSBP1	0.000661689	0.00082326	8.69943e-05	0.000354313	1.55572e-25	Proliferative
SNRPE	0.000660557	0.000675654	2.61946e-06	4.44492e-06	1.55572e-25	Proliferative
YWHAE	0.000656697	0.00154431	0.000257985	0.000305711	0.000368222	Proliferative
NUCKS1	0.000648906	0.00302108	0.000199368	3.50321e-20	0.000438898	Proliferative
DEK	0.000648116	0.0021255	0.000170231	0.000225751	0.000937809	Proliferative
HNRNPD	0.000639391	0.00167262	0.000394124	3.3182e-05	0.000554686	Proliferative
HNRNPDL	0.000632773	0.00120674	0.000390775	0.00103512	0.000790498	Proliferative
HNRNPK	0.00063182	0.00171915	0.000218422	0.000159725	0.000334174	Proliferative
ARL6IP1	0.000623057	0.000656608	0.000171354	0.000229366	0.000443109	Proliferative
GNAS	0.00062123	0.00149402	0.000507709	6.32736e-05	0.001309	Proliferative
HNRNPU	0.000608254	0.00419397	0.000445683	0.00150681	0.00171759	Proliferative
LSM7	0.000597908	0.00080628	9.20764e-05	0.000509758	7.65214e-07	Proliferative
POLR1D	0.000597589	0.000761009	0.00012695	0.000342009	0.000108013	Proliferative
SUB1	0.000596759	0.00106847	7.48343e-05	9.24993e-05	0.000171639	Proliferative
TAF1D	0.00058811	0.00159005	0.000639729	0.000689772	0.0012448	Proliferative
NOL7	0.000583016	0.000849355	4.2468e-05	0.000159918	0.000244382	Proliferative
PA2G4	0.000574945	0.00129338	7.89684e-05	0.00035566	1.45802e-06	Proliferative
CCT3	0.000552509	0.000861946	0.000181178	8.20754e-05	3.74462e-05	Proliferative
HMGN1	0.00054781	0.00109514	0.000157913	0.000555221	0.00022277	Proliferative
FBL	0.000545143	0.000690021	1.29175e-05	0.000189767	2.30049e-05	Proliferative
MTDH	0.000542146	0.00285068	0.000560884	8.23915e-05	0.00109075	Proliferative
PSMA3	0.000531727	0.000558164	0.000142018	4.42856e-05	3.46995e-13	Proliferative
C11orf58	0.000530117	0.00100274	0.000322601	0.000748459	0.000175274	Proliferative
NOLC1	0.000529468	0.000923511	9.03106e-06	3.33835e-05	0.000258591	Proliferative
GLO1	0.000525794	0.000648695	5.1659e-05	1.73094e-08	0.000104788	Proliferative
MZT2B	0.000524497	0.000773287	3.9014e-05	0.000556386	1.52014e-06	Proliferative
XRCC5	0.000522399	0.000930393	0.000463465	2.17314e-05	0.000170183	Proliferative
TBCA	0.000515375	0.000582286	0.000249487	0.000302433	7.16075e-05	Proliferative
COPS9	0.00051164	0.000576591	1.47968e-25	4.74525e-05	0.000103771	Proliferative
ACP1	0.000505453	0.000521388	8.44687e-05	3.50631e-05	6.58266e-05	Proliferative
HNRNPM	0.000498948	0.00236903	0.000242792	0.000144436	0.000563382	Proliferative
NDUFS6	0.000495589	0.00070686	8.01194e-05	0.000309881	0.000182523	Proliferative
NDUFB6	0.000493138	0.000809683	1.50486e-05	4.36584e-25	1.55572e-25	Proliferative
CCT2	0.000484304	0.000683189	0.000135454	1.00315e-05	6.74337e-05	Proliferative
MRPL33	0.000483263	0.000613086	6.93303e-05	0.000129313	0.000128352	Proliferative
CCT6A	0.000482131	0.00352856	7.41833e-05	7.0526e-05	0.000220482	Proliferative
CBX3	0.000482033	0.00270825	0.000111651	0.00050588	0.000458901	Proliferative
PSMA1	0.00047914	0.000514347	0.000283021	0.000180601	8.54938e-05	Proliferative
UBE2K	0.00047868	0.000604171	0.000547052	6.06578e-05	1.35374e-07	Proliferative
AIMP1	0.000476928	0.000508068	8.53478e-05	5.98214e-05	8.26739e-05	Proliferative
PRPF40A	0.000472175	0.00161006	0.000370016	4.36584e-25	0.000779954	Proliferative
NOP58	0.000471414	0.00162947	0.000304315	0.000116876	0.000661131	Proliferative
FKBP3	0.000467115	0.000600851	4.71711e-05	5.25529e-06	2.11289e-06	Proliferative
NSA2	0.000455325	0.000904531	3.82718e-05	0.000679669	4.5658e-05	Proliferative
ATP5F1A	0.000453451	0.00183179	6.34045e-05	0.000232596	4.20386e-05	Proliferative
CHMP4B	0.000451758	0.000884365	0.000180053	0.000195125	0.00038439	Proliferative
MRPL57	0.000439257	0.000521833	3.60437e-05	0.000289214	2.86627e-11	Proliferative
PRPF38B	0.000434484	0.00104601	0.000256476	3.71455e-07	0.00102173	Proliferative
TAX1BP1	0.000428692	0.00243165	0.000458701	7.13608e-05	0.00183043	Proliferative
CCNI	0.000426547	0.000716157	0.000223404	0.000128164	0.00054366	Proliferative
SSB	0.000423659	0.00137164	6.32494e-05	4.36584e-25	0.000188998	Proliferative
SBDS	0.000422735	0.000799154	2.75634e-05	0.000135586	0.000331838	Proliferative
MRPL20	0.000421266	0.00056678	4.78289e-05	0.00011093	3.01322e-05	Proliferative
PARP1	0.000421132	0.000904542	3.2433e-05	5.36934e-23	7.19491e-05	Proliferative
SUCLG1	0.000419672	0.000770162	6.92278e-05	4.82966e-05	6.10848e-07	Proliferative
PDAP1	0.000419077	0.000673401	3.38784e-05	0.000455218	0.00037563	Proliferative
ANP32E	0.00041907	0.000646491	1.46714e-05	0.000578324	6.51815e-05	Proliferative
CCT5	0.000413204	0.000742379	0.000112764	5.78164e-05	0.000120652	Proliferative
KRT10	0.000412592	0.000519977	2.02292e-05	8.34806e-05	0.00012658	Proliferative
TOP1	0.000405395	0.00117448	0.000556113	0.000268251	0.000997823	Proliferative
PFDN4	0.000401688	0.00100935	1.49396e-05	4.61742e-05	8.92415e-11	Proliferative
HADHA	0.000400206	0.000615411	0.0002907	7.00697e-05	0.000174106	Proliferative
IQGAP1	0.000400077	0.000812346	0.000576662	0.000648112	0.000779533	Proliferative
LSM5	0.000399854	0.000510048	3.55357e-05	6.60952e-05	7.72487e-16	Proliferative
NASP	0.000394519	0.00113927	9.57044e-05	0.000119257	0.000123804	Proliferative
UQCRFS1	0.000391844	0.000398535	3.44527e-05	5.96882e-05	4.60611e-19	Proliferative
EWSR1	0.000391512	0.000410527	0.0003621	0.000209728	0.000321862	Proliferative
TKT	0.000387458	0.000389112	0.000139939	6.54149e-05	0.000179347	Proliferative
CCT4	0.000387402	0.000639216	0.000134097	8.27777e-06	0.00017911	Proliferative
SPCS2	0.000385712	0.000399394	0.000206934	6.99288e-05	1.55572e-25	Proliferative
ANP32A	0.000385033	0.000908815	0.000148483	3.97396e-05	7.35204e-05	Proliferative
KHDRBS1	0.000384047	0.00101969	0.000242934	9.45181e-05	0.000205877	Proliferative
KTN1	0.000382779	0.00151934	0.000728829	0.000795967	0.00147769	Proliferative
RANBP1	0.000382235	0.000641852	1.66145e-05	8.92401e-05	1.55572e-25	Proliferative
PPM1G	0.000382016	0.000908621	0.000176757	2.69995e-06	0.000104423	Proliferative
EIF3D	0.00038123	0.000569758	9.68318e-05	4.66348e-05	8.67728e-05	Proliferative
C9orf78	0.000377563	0.000811179	8.21559e-06	1.73372e-05	0.000161959	Proliferative
EIF3M	0.000376588	0.00054519	0.000164137	0.000141994	5.62458e-05	Proliferative
NOP53	0.000374297	0.00100919	6.5751e-05	0.000310299	0.000408459	Proliferative
PSMB2	0.000374285	0.000467929	5.18579e-05	8.87551e-06	1.10258e-06	Proliferative
ETFB	0.000373752	0.000387412	6.30414e-05	0.000321616	0.000258385	Proliferative
NUDC	0.000373352	0.000753159	0.000108329	5.50667e-05	0.000560242	Proliferative
MRFAP1	0.000373279	0.000385635	1.44759e-05	2.48174e-06	8.2994e-05	Proliferative
NOP56	0.000372959	0.001941	0.000161908	0.000163292	0.000516498	Proliferative
EBAG9	0.000372456	0.00062918	2.94042e-05	4.36584e-25	5.69088e-05	Proliferative
PPP1R1B	0.000371361	0.00059437	4.2651e-05	9.87996e-05	3.96215e-07	Proliferative
NUB1	0.000369245	0.000632114	0.000152581	0.000241116	0.00022559	Proliferative
SSR3	0.000364785	0.000476312	0.000121746	3.71406e-06	0.000387443	Proliferative
EBNA1BP2	0.000357089	0.000526096	1.90083e-05	4.36584e-25	2.19754e-15	Proliferative
MORF4L2	0.000357056	0.000966829	0.000278025	0.000152282	0.000729947	Proliferative
SRP72	0.000355161	0.000750737	0.000123196	4.36584e-25	5.36361e-05	Proliferative
STAU1	0.000353532	0.000612569	0.000483565	2.87826e-05	0.00025795	Proliferative
PSMD7	0.000352841	0.000584597	0.000100159	6.95482e-05	0.000236346	Proliferative
NME2	0.000350497	0.000667708	8.63243e-05	1.29477e-06	1.55572e-25	Proliferative
METAP2	0.000349734	0.00130758	0.00010765	0.00045123	0.000542058	Proliferative
GNL3	0.000349472	0.000861186	0.00011495	0.000414975	0.000214447	Proliferative
RAB13	0.000348234	0.000393598	2.38078e-05	8.80847e-05	0.000206603	Proliferative
ABRACL	0.000345307	0.000368354	6.99442e-05	2.22447e-05	2.26793e-05	Proliferative
GPATCH4	0.000344411	0.000679368	3.22189e-05	4.36584e-25	0.000192723	Proliferative
PSMD12	0.000343742	0.0003897	0.000104789	2.79597e-05	8.19874e-05	Proliferative
NDUFA10	0.000342605	0.000438418	0.000185246	7.77835e-05	0.000200408	Proliferative
KPNB1	0.000341239	0.000837438	0.000306735	5.44196e-05	0.000341797	Proliferative
XRCC6	0.000339126	0.00055932	0.000141273	2.87501e-05	7.96968e-05	Proliferative
RALBP1	0.000334735	0.000461954	0.000161425	0.00027915	0.000357221	Proliferative
EIF3F	0.000334129	0.000422785	6.14531e-05	0.00024581	1.55572e-25	Proliferative
SNX3	0.000332691	0.000927516	0.000141896	1.64535e-05	7.49772e-05	Proliferative
GTF3C6	0.000332189	0.000539335	1.58181e-05	2.08076e-05	3.48548e-05	Proliferative
CYB5A	0.00033183	0.000439438	7.76652e-05	0.000216037	1.55572e-25	Proliferative
STIP1	0.000331239	0.00059854	0.000110976	3.06446e-05	0.000336567	Proliferative
ARPC5L	0.000330309	0.000513734	9.00775e-05	6.33117e-05	0.000136377	Proliferative
DENR	0.000328348	0.000374036	0.000176714	0.000118349	0.00012927	Proliferative
GRB2	0.000326723	0.000651785	0.000220784	2.87817e-05	0.000105639	Proliferative
CWC15	0.000326495	0.000570055	5.26058e-05	4.36584e-25	0.00017591	Proliferative
CCDC47	0.000324568	0.000513516	0.000108573	3.74177e-05	0.000415038	Proliferative
RBBP7	0.000323893	0.000435098	6.80474e-05	0.000181809	0.000111831	Proliferative
ZC3H15	0.000319476	0.00130372	0.000153707	0.000235444	0.000501294	Proliferative
CHMP5	0.000316568	0.000504583	6.0144e-05	5.05077e-08	3.87574e-05	Proliferative
SMARCA5	0.000316396	0.00140516	0.000107714	9.55151e-05	0.00032223	Proliferative
NDUFA5	0.00031577	0.000447732	3.9654e-05	0.000110663	0.000146668	Proliferative
TAF7	0.000315656	0.00071359	0.0001387	0.000273375	0.000467503	Proliferative
RSL24D1	0.000314638	0.000646451	3.62233e-05	0.000231061	8.96521e-05	Proliferative
GTF3A	0.000314562	0.00113566	6.32687e-05	3.73405e-05	2.41809e-06	Proliferative
HNRNPR	0.000312188	0.00155949	0.000205931	0.000129583	0.000190164	Proliferative
ACTR2	0.000311873	0.000715617	0.000434797	0.000165793	0.000431146	Proliferative
DKC1	0.000310831	0.000798762	4.39608e-05	2.95686e-05	1.15822e-05	Proliferative
EIF4G1	0.000308598	0.000484819	0.000220103	3.34742e-05	0.000397126	Proliferative
YY1	0.000307335	0.000825482	0.000235933	0.000176843	0.000288007	Proliferative
DUT	0.000307054	0.000344305	7.51722e-05	3.22026e-05	2.18404e-05	Proliferative
EIF4B	0.000305422	0.000821127	0.000274549	0.00014175	0.000135089	Proliferative
SYF2	0.000305311	0.000916367	2.09605e-05	0.000743954	0.000370846	Proliferative
MRPS35	0.000304485	0.00094549	0.0001342	4.36584e-25	9.02149e-05	Proliferative
RTF2	0.000301114	0.000505257	0.000182787	1.48748e-05	0.000157259	Proliferative
RTRAF	0.000300527	0.000439441	5.64347e-05	1.17701e-19	0.000105424	Proliferative
TCP1	0.000299608	0.000659876	4.2655e-05	0.000409883	0.00036775	Proliferative
CCDC59	0.000295655	0.000602266	1.48645e-05	0.000111186	0.000130747	Proliferative
PDIA4	0.000295406	0.000450183	0.000224808	0.000424512	0.000222203	Proliferative
GDI2	0.000295042	0.000533611	0.000300867	0.000184564	7.77112e-05	Proliferative
NONO	0.000293768	0.000365436	0.000174558	3.1363e-05	0.000190854	Proliferative
GGCT	0.000293432	0.000718655	2.11628e-05	1.08078e-05	2.36754e-24	Proliferative
DDX18	0.000292728	0.000878671	0.000138235	0.000457205	0.000295427	Proliferative
TCEA1	0.000292644	0.000577253	0.000190397	0.000431302	3.03919e-05	Proliferative
SVIP	0.000292626	0.000410203	3.79924e-05	0.00029037	0.000207599	Proliferative
AFG3L2	0.000291757	0.000476413	0.000175228	0.000407478	9.89715e-05	Proliferative
BZW2	0.000288958	0.000554273	0.000202548	0.000140472	0.000123807	Proliferative
MATR3	0.000285239	0.00169046	1.47968e-25	4.36584e-25	0.000655731	Proliferative
[truncated: 1,002 more rows]

## Sheet: Table S3
Supplementary Table S3 - Gene sets used to score cells for each biological process in figure 1 radar plot
Biological Process	Gene set
Proliferation (MYC/E2F/G2M)	MKI67,TOP2A,HMGB2,SMC4,STMN1,TYMS,MCM5,PCNA
Stress/AP-1	JUN,JUNB,JUND,FOS,FOSL1,FOSL2,ATF3,EGR1,DUSP1
Plasticity (Notch)	HES1,HEY1,HEY2,NRARP
Epithelial polarity & junction	TJP1,TJP2,OCLN,CLDN3,CLDN4,MAGI1,PARD3,PATJ
Secretory differentiation	AGR2,XBP1,CLDN18,PIGR
Regenerative repair	REG4,TFF1,TFF2,TFF3,SPINK1,GDF15
MHC-I presentation	B2M,HLA-A,HLA-B,HLA-C,TAP1,TAP2,PSMB8,PSMB9
IFN response	STAT1,IRF1,ISG15,IFITM1,IFITM3,IFIT1,IFIT3,MX1,OAS1

## Sheet: Table S4
Supplementary Table S4 - Cell type frequency for initial broad cell type annotation by sample
Patient	Sample	Sample type	Number of cells	Cancer	Endothelial and Mural	Normal Epithelial	Lymphoid	Myeloid	Stromal	Other	Unknown
OAC1	OAC1	Biopsy	26245	2184	5958	274	9065	2135	3771	2822	36
	OAC1R	Resection	265368	65310	30350	37472	17598	29137	71335	13211	955
OAC2	OAC2	Biopsy	5274	341	253	3330	367	292	411	267	13
	OAC2R	Resection	240788	3447	27737	1649	42344	75753	82624	7072	162
OAC3	OAC3	Biopsy	147733	40210	14949	28601	19753	20680	12257	11070	213
	OAC3R	Resection	211378	5655	90053	5777	23588	11120	65783	9162	240
OAC4	OAC4	Biopsy	20774	2545	3977	147	3294	3336	5301	2092	82
	OAC4R_ALL	Resection complete	185887	15136	81773	35769	7800	5097	39713	0	599
	OAC4R	Resection representative subset	78774	9313	23928	20307	4804	2385	17785	0	252
OAC5	OAC5	Biopsy	23355	5876	3328	263	2382	2334	4096	4882	194
	OAC5R	Resection	165905	29667	54265	6012	7596	16402	46181	5686	96

## Sheet: Table S5
Supplementary Table S5 - Assignment of cNMF programmes to all CosMx cancer cells and breakdown of ambiguous cancer cells after threshold removal
Original Assignment	NMF Combination New Label	NMF Combination Class	NMF Combination n Programmes	Cells n	Proportion of Cancer Cells
Proliferative	Proliferative High confidence	Single_programme_dominant	1	22614	0.106575
Invasive	Invasive High confidence	Single_programme_dominant	1	21742	0.102466
Stress adapted	Stress adapted High confidence	Single_programme_dominant	1	20854	0.0982808
Immune-primed	Immune-primed High confidence	Single_programme_dominant	1	19851	0.0935538
Stress repair	Stress repair High confidence	Single_programme_dominant	1	19839	0.0934973
Ambiguous	Invasive Low confidence	Single_programme_dominant	1	19830	0.0934549
Ambiguous	Proliferative Low confidence	Single_programme_dominant	1	9768	0.0460346
Ambiguous	Stress repair Low confidence	Single_programme_dominant	1	9407	0.0443333
Ambiguous	Immune-primed Low confidence	Single_programme_dominant	1	9311	0.0438809
Ambiguous	Stress adapted Low confidence	Single_programme_dominant	1	9036	0.0425849
Ambiguous	Immune-primed_Stress adapted_codominant	Two_programmes_codominant	2	4862	0.0229136
Ambiguous	Immune-primed_Stress repair_codominant	Two_programmes_codominant	2	4826	0.022744
Ambiguous	Invasive_Stress adapted_codominant	Two_programmes_codominant	2	4503	0.0212217
Ambiguous	Proliferative_Invasive_codominant	Two_programmes_codominant	2	4389	0.0206845
Ambiguous	Invasive_Stress repair_codominant	Two_programmes_codominant	2	4361	0.0205525
Ambiguous	Proliferative_Stress repair_codominant	Two_programmes_codominant	2	4259	0.0200718
Ambiguous	Immune-primed_Proliferative_codominant	Two_programmes_codominant	2	3821	0.0180076
Ambiguous	Immune-primed_Invasive_codominant	Two_programmes_codominant	2	3658	0.0172394
Ambiguous	Stress repair_Stress adapted_codominant	Two_programmes_codominant	2	3611	0.0170179
Ambiguous	Proliferative_Stress adapted_codominant	Two_programmes_codominant	2	2985	0.0140677
Ambiguous	Immune-primed_Stress repair_Stress adapted_codominant	Three_programmes_codominant	3	974	0.00459027
Ambiguous	Immune-primed_Proliferative_Stress repair_codominant	Three_programmes_codominant	3	926	0.00436405
Ambiguous	Immune-primed_Invasive_Stress adapted_codominant	Three_programmes_codominant	3	787	0.00370898
Ambiguous	Proliferative_Invasive_Stress repair_codominant	Three_programmes_codominant	3	769	0.00362414
Ambiguous	Immune-primed_Proliferative_Stress adapted_codominant	Three_programmes_codominant	3	755	0.00355817
Ambiguous	Immune-primed_Invasive_Stress repair_codominant	Three_programmes_codominant	3	741	0.00349219
Ambiguous	Invasive_Stress repair_Stress adapted_codominant	Three_programmes_codominant	3	720	0.00339322
Ambiguous	Immune-primed_Proliferative_Invasive_codominant	Three_programmes_codominant	3	675	0.00318114
Ambiguous	Proliferative_Stress repair_Stress adapted_codominant	Three_programmes_codominant	3	662	0.00311987
Ambiguous	Proliferative_Invasive_Stress adapted_codominant	Three_programmes_codominant	3	628	0.00295964
Ambiguous	Immune-primed_Proliferative_Stress repair_Stress adapted_mixed	Four_programmes_mixed	4	259	0.00122062
Ambiguous	Immune-primed_Proliferative_Invasive_Stress repair_mixed	Four_programmes_mixed	4	196	0.000923709
Ambiguous	Immune-primed_Invasive_Stress repair_Stress adapted_mixed	Four_programmes_mixed	4	166	0.000782325
Ambiguous	Immune-primed_Proliferative_Invasive_Stress adapted_mixed	Four_programmes_mixed	4	165	0.000777612
Ambiguous	Proliferative_Invasive_Stress repair_Stress adapted_mixed	Four_programmes_mixed	4	155	0.000730484
Ambiguous	All_cNMF_programmes_mixed	All_programmes_mixed	5	83	0.000391163

## Sheet: Table S6
Supplementary Table S6 - Moran's I spatial autocorrelation test scores
Sample	Sample Type	cNMF Programme	Moran's I	Adjusted P value
OAC1	Biopsy	Immune-primed	0.518	<0.001
		Proliferative	0.603	<0.001
		Invasive	0.506	<0.001
		Stress repair	0.386	<0.001
		Stress adapted	0.736	<0.001
	Resection	Immune-primed	0.501	<0.001
		Proliferative	0.578	<0.001
		Invasive	0.468	<0.001
		Stress repair	0.151	<0.001
		Stress adapted	0.449	<0.001
OAC2	Biopsy	Immune-primed	0.527	<0.001
		Proliferative	0.161	<0.001
		Invasive	0.164	<0.001
		Stress repair	0.054	<0.001
		Stress adapted	0.352	<0.001
	Resection	Immune-primed	0.374	<0.001
		Proliferative	0.132	<0.001
		Invasive	0.199	<0.001
		Stress repair	0.102	<0.001
		Stress adapted	0.202	<0.001
OAC3	Biopsy	Immune-primed	0.641	<0.001
		Proliferative	0.668	<0.001
		Invasive	0.507	<0.001
		Stress repair	0.179	<0.001
		Stress adapted	0.516	<0.001
	Resection	Immune-primed	0.326	<0.001
		Proliferative	0.498	<0.001
		Invasive	0.329	<0.001
		Stress repair	0.174	<0.001
		Stress adapted	0.253	<0.001
OAC4	Biopsy	Immune-primed	0.346	<0.001
		Proliferative	0.555	<0.001
		Invasive	0.393	<0.001
		Stress repair	0.102	<0.001
		Stress adapted	0.66	<0.001
	Resection	Immune-primed	0.531	<0.001
		Proliferative	0.177	<0.001
		Invasive	0.173	<0.001
		Stress repair	0.316	<0.001
		Stress adapted	0.295	<0.001
OAC5	Biopsy	Immune-primed	0.307	<0.001
		Proliferative	0.221	<0.001
		Invasive	0.124	<0.001
		Stress repair	0.165	<0.001
		Stress adapted	0.198	<0.001
	Resection	Immune-primed	0.453	<0.001
		Proliferative	0.377	<0.001
		Invasive	0.193	<0.001
		Stress repair	0.157	<0.001
		Stress adapted	0.294	<0.001

## Sheet: Table S7
Supplementary Table S7 - cNMF scores before and after chemotherapy
	Biopsy					Resection
cNMF Programme	Mean	SD	Median	Q1	Q3	Mean	SD	Median	Q1	Q3	p value	Adjusted p value
Immune-primed	0.224152	0.139525	0.197584	0.122916	0.297177	0.169486	0.10945	0.151167	0.0950387	0.222283	0	0
Proliferative	0.240851	0.154584	0.239769	0.126803	0.343586	0.261317	0.152542	0.252499	0.157424	0.352628	3.41e-142	4.2625e-142
Invasive	0.358542	0.15053	0.359153	0.259672	0.45927	0.343727	0.158898	0.346745	0.235462	0.459777	4.59e-70	4.59e-70
Stress repair	0.00202257	0.00489825	0	0	0.00225298	0.00240229	0.00381139	0.000958129	0	0.00358319	0	0
Stress adapted	0.174433	0.131505	0.158126	0.0823364	0.241268	0.223068	0.13635	0.209711	0.127491	0.300646	0	0

## Sheet: Table S8
Supplementary Table S8 - Differences in cNMF score after correction for sample sizes/cell numbers
cNMF Programme	Estimate	se	p value	Adjusted p value
Immune-primed	-0.0739173	0.000924721	0	0
Proliferative	0.0884404	0.00114984	0	0
Invasive	-0.05902	0.00113477	0	0
Stress repair	-0.00124326	3.20951e-05	0	0
Stress adapted	0.0457595	0.00101912	0	0

## Sheet: Table S9
Supplementary Table S9 - Percentage of cell types within given distances of a cancer cell
Condition	Radius (uM)	Neighbour Cell	Anchor Cell	n_patients	mean_pct	sd_pct	se
Biopsy	10	Desmoplastic CAF	Cancer	5	0.749149	0.357572	0.159911
Biopsy	10	MyoCAF	Cancer	5	2.0248	0.891856	0.39885
Biopsy	10	Quiescent fibroblast 1	Cancer	5	0.0629098	0.101334	0.045318
Biopsy	10	Quiescent fibroblast 2	Cancer	5	0.0574602	0.0428853	0.0191789
Biopsy	10	Stress responsive CAF	Cancer	5	0.439377	0.225102	0.100669
Biopsy	10	Transitionary fibroblast	Cancer	5	0.476934	0.342565	0.1532
Biopsy	10	Universal fibroblast	Cancer	5	0.580771	0.470557	0.210439
Biopsy	25	Desmoplastic CAF	Cancer	5	2.18336	1.29727	0.580155
Biopsy	25	MyoCAF	Cancer	5	5.15628	2.16415	0.967838
Biopsy	25	Quiescent fibroblast 1	Cancer	5	0.167246	0.242172	0.108303
Biopsy	25	Quiescent fibroblast 2	Cancer	5	0.185908	0.109697	0.0490581
Biopsy	25	Stress responsive CAF	Cancer	5	0.899697	0.478005	0.21377
Biopsy	25	Transitionary fibroblast	Cancer	5	1.11927	0.582195	0.260365
Biopsy	25	Universal fibroblast	Cancer	5	1.19985	0.927596	0.414834
Biopsy	50	Desmoplastic CAF	Cancer	5	3.09393	2.24712	1.00494
Biopsy	50	MyoCAF	Cancer	5	6.53679	2.46334	1.10164
Biopsy	50	Quiescent fibroblast 1	Cancer	5	0.230521	0.331772	0.148373
Biopsy	50	Quiescent fibroblast 2	Cancer	5	0.260103	0.164137	0.0734042
Biopsy	50	Stress responsive CAF	Cancer	5	1.13296	0.632684	0.282945
Biopsy	50	Transitionary fibroblast	Cancer	5	1.5108	0.777821	0.347852
Biopsy	50	Universal fibroblast	Cancer	5	1.46689	1.10178	0.492732
Biopsy	100	Desmoplastic CAF	Cancer	5	3.65415	2.9408	1.31517
Biopsy	100	MyoCAF	Cancer	5	7.26632	2.74318	1.22679
Biopsy	100	Quiescent fibroblast 1	Cancer	5	0.292703	0.412234	0.184357
Biopsy	100	Quiescent fibroblast 2	Cancer	5	0.307977	0.201494	0.0901107
Biopsy	100	Stress responsive CAF	Cancer	5	1.28904	0.720943	0.322416
Biopsy	100	Transitionary fibroblast	Cancer	5	1.77116	0.946189	0.423149
Biopsy	100	Universal fibroblast	Cancer	5	1.65843	1.23187	0.55091
Biopsy	200	Desmoplastic CAF	Cancer	5	4.00976	3.54434	1.58508
Biopsy	200	MyoCAF	Cancer	5	7.59563	3.06117	1.36899
Biopsy	200	Quiescent fibroblast 1	Cancer	5	0.335394	0.472552	0.211332
Biopsy	200	Quiescent fibroblast 2	Cancer	5	0.359316	0.243043	0.108692
Biopsy	200	Stress responsive CAF	Cancer	5	1.38548	0.801739	0.358549
Biopsy	200	Transitionary fibroblast	Cancer	5	1.95775	1.08913	0.487072
Biopsy	200	Universal fibroblast	Cancer	5	1.7993	1.34192	0.600124
Resection	10	Desmoplastic CAF	Cancer	5	0.717983	0.414889	0.185544
Resection	10	MyoCAF	Cancer	5	1.53837	1.09284	0.488734
Resection	10	Quiescent fibroblast 1	Cancer	5	0.0379464	0.0335303	0.0149952
Resection	10	Quiescent fibroblast 2	Cancer	5	0.0674691	0.0431888	0.0193146
Resection	10	Stress responsive CAF	Cancer	5	0.424615	0.382176	0.170914
Resection	10	Transitionary fibroblast	Cancer	5	0.25742	0.153454	0.0686266
Resection	10	Universal fibroblast	Cancer	5	0.12428	0.0783634	0.0350452
Resection	25	Desmoplastic CAF	Cancer	5	3.00354	1.63908	0.73302
Resection	25	MyoCAF	Cancer	5	5.45994	1.84934	0.827048
Resection	25	Quiescent fibroblast 1	Cancer	5	0.172513	0.239289	0.107013
Resection	25	Quiescent fibroblast 2	Cancer	5	0.412507	0.395729	0.176975
Resection	25	Stress responsive CAF	Cancer	5	1.34401	0.701144	0.313561
Resection	25	Transitionary fibroblast	Cancer	5	0.940536	0.626324	0.280101
Resection	25	Universal fibroblast	Cancer	5	0.49705	0.443574	0.198372
Resection	50	Desmoplastic CAF	Cancer	5	4.94549	2.25427	1.00814
Resection	50	MyoCAF	Cancer	5	7.56321	1.80589	0.80762
Resection	50	Quiescent fibroblast 1	Cancer	5	0.298833	0.354333	0.158462
Resection	50	Quiescent fibroblast 2	Cancer	5	0.724727	0.666653	0.298136
Resection	50	Stress responsive CAF	Cancer	5	2.17291	0.724461	0.323989
Resection	50	Transitionary fibroblast	Cancer	5	1.45736	1.05702	0.472716
Resection	50	Universal fibroblast	Cancer	5	0.830513	0.843354	0.377159
Resection	100	Desmoplastic CAF	Cancer	5	6.69216	3.47368	1.55348
Resection	100	MyoCAF	Cancer	5	8.4291	1.69042	0.755978
Resection	100	Quiescent fibroblast 1	Cancer	5	0.444024	0.495526	0.221606
Resection	100	Quiescent fibroblast 2	Cancer	5	1.00347	0.850317	0.380274
Resection	100	Stress responsive CAF	Cancer	5	3.3406	2.01021	0.898994
Resection	100	Transitionary fibroblast	Cancer	5	1.66972	1.19319	0.533613
Resection	100	Universal fibroblast	Cancer	5	1.14013	1.17493	0.525444
Resection	200	Desmoplastic CAF	Cancer	5	7.7843	4.91632	2.19865
Resection	200	MyoCAF	Cancer	5	8.52078	1.54513	0.691004
Resection	200	Quiescent fibroblast 1	Cancer	5	0.578038	0.633361	0.283248
Resection	200	Quiescent fibroblast 2	Cancer	5	1.19999	0.946619	0.423341
Resection	200	Stress responsive CAF	Cancer	5	4.50744	3.72949	1.66788
Resection	200	Transitionary fibroblast	Cancer	5	1.73976	1.1755	0.5257
Resection	200	Universal fibroblast	Cancer	5	1.38836	1.38402	0.618952
Biopsy	10	B cell	Cancer	5	0.663019	0.544821	0.243651
Biopsy	10	Dendritic cell	Cancer	5	0.396664	0.20578	0.0920277
Biopsy	10	Granulocyte	Cancer	5	0.0176	0.0270616	0.0121023
Biopsy	10	M1 macrophage	Cancer	5	0.205893	0.197055	0.0881257
Biopsy	10	M2 macrophage	Cancer	5	1.16643	0.698796	0.312511
Biopsy	10	Monocyte	Cancer	5	0.158031	0.0930531	0.0416146
Biopsy	10	NK cell	Cancer	5	0.388522	0.431419	0.192936
Biopsy	10	Plasma cell	Cancer	5	0.309311	0.183089	0.08188
Biopsy	10	T cell	Cancer	5	0.898077	1.12411	0.502718
Biopsy	10	Treg	Cancer	5	0.0926259	0.138079	0.0617509
Biopsy	25	B cell	Cancer	5	1.59653	1.52577	0.682347
Biopsy	25	Dendritic cell	Cancer	5	0.843418	0.437419	0.19562
Biopsy	25	Granulocyte	Cancer	5	0.0738926	0.0776093	0.0347079
Biopsy	25	M1 macrophage	Cancer	5	0.516478	0.444999	0.199009
Biopsy	25	M2 macrophage	Cancer	5	2.85252	1.64098	0.733868
Biopsy	25	Monocyte	Cancer	5	0.284386	0.209287	0.093596
Biopsy	25	NK cell	Cancer	5	0.867756	1.03559	0.463128
Biopsy	25	Plasma cell	Cancer	5	1.00337	0.810272	0.362365
Biopsy	25	T cell	Cancer	5	2.10667	3.06081	1.36884
Biopsy	25	Treg	Cancer	5	0.226656	0.398192	0.178077
Biopsy	50	B cell	Cancer	5	2.41183	2.45277	1.09691
Biopsy	50	Dendritic cell	Cancer	5	1.13316	0.567827	0.25394
Biopsy	50	Granulocyte	Cancer	5	0.101166	0.104541	0.0467521
Biopsy	50	M1 macrophage	Cancer	5	0.672409	0.599627	0.268161
Biopsy	50	M2 macrophage	Cancer	5	3.58689	1.79768	0.803945
Biopsy	50	Monocyte	Cancer	5	0.334607	0.261746	0.117056
Biopsy	50	NK cell	Cancer	5	1.16542	1.39337	0.623134
Biopsy	50	Plasma cell	Cancer	5	1.83752	1.51652	0.67821
Biopsy	50	T cell	Cancer	5	2.92992	4.3506	1.94565
Biopsy	50	Treg	Cancer	5	0.358316	0.62538	0.279678
Biopsy	100	B cell	Cancer	5	3.10999	3.27282	1.46365
Biopsy	100	Dendritic cell	Cancer	5	1.28627	0.633742	0.283418
Biopsy	100	Granulocyte	Cancer	5	0.117374	0.127825	0.057165
Biopsy	100	M1 macrophage	Cancer	5	0.775159	0.707192	0.316266
Biopsy	100	M2 macrophage	Cancer	5	3.99147	1.89602	0.847925
Biopsy	100	Monocyte	Cancer	5	0.370526	0.276571	0.123686
Biopsy	100	NK cell	Cancer	5	1.43116	1.73334	0.775171
Biopsy	100	Plasma cell	Cancer	5	2.54389	2.09536	0.937074
Biopsy	100	T cell	Cancer	5	3.61134	5.45619	2.44008
Biopsy	100	Treg	Cancer	5	0.44923	0.783903	0.350572
Biopsy	200	B cell	Cancer	5	3.50913	3.7688	1.68546
Biopsy	200	Dendritic cell	Cancer	5	1.3577	0.645899	0.288855
Biopsy	200	Granulocyte	Cancer	5	0.130151	0.142209	0.0635979
Biopsy	200	M1 macrophage	Cancer	5	0.854447	0.786759	0.351849
Biopsy	200	M2 macrophage	Cancer	5	4.11248	1.96434	0.878481
Biopsy	200	Monocyte	Cancer	5	0.408227	0.311098	0.139127
Biopsy	200	NK cell	Cancer	5	1.61767	1.97586	0.883629
Biopsy	200	Plasma cell	Cancer	5	2.91149	2.32537	1.03994
Biopsy	200	T cell	Cancer	5	4.11176	6.24972	2.79496
Biopsy	200	Treg	Cancer	5	0.506751	0.889823	0.397941
Resection	10	B cell	Cancer	5	0.205234	0.235617	0.105371
Resection	10	Dendritic cell	Cancer	5	0.522137	0.646847	0.289279
Resection	10	Granulocyte	Cancer	5	0.202574	0.323721	0.144773
Resection	10	M1 macrophage	Cancer	5	0.866898	1.02753	0.459527
Resection	10	M2 macrophage	Cancer	5	1.22198	1.17047	0.52345
Resection	10	Monocyte	Cancer	5	0.304193	0.276363	0.123593
Resection	10	NK cell	Cancer	5	0.216534	0.32786	0.146623
Resection	10	Plasma cell	Cancer	5	0.09983	0.101929	0.0455841
Resection	10	T cell	Cancer	5	0.596818	0.944623	0.422448
Resection	10	Treg	Cancer	5	0.0803955	0.141465	0.0632649
Resection	25	B cell	Cancer	5	0.805015	1.14315	0.511232
Resection	25	Dendritic cell	Cancer	5	1.74858	2.10865	0.943018
Resection	25	Granulocyte	Cancer	5	0.593376	0.967571	0.432711
Resection	25	M1 macrophage	Cancer	5	2.55871	3.29212	1.47228
Resection	25	M2 macrophage	Cancer	5	4.04342	4.12304	1.84388
Resection	25	Monocyte	Cancer	5	0.882731	0.788559	0.352654
Resection	25	NK cell	Cancer	5	0.636862	0.917252	0.410208
Resection	25	Plasma cell	Cancer	5	0.38691	0.437519	0.195664
Resection	25	T cell	Cancer	5	2.04807	3.56169	1.59284
Resection	25	Treg	Cancer	5	0.292525	0.558735	0.249874
Resection	50	B cell	Cancer	5	1.19038	1.86777	0.83529
Resection	50	Dendritic cell	Cancer	5	2.50229	2.98228	1.33372
Resection	50	Granulocyte	Cancer	5	0.824407	1.32837	0.594066
Resection	50	M1 macrophage	Cancer	5	3.36149	4.33691	1.93952
Resection	50	M2 macrophage	Cancer	5	5.16774	5.12384	2.29145
Resection	50	Monocyte	Cancer	5	1.11286	0.958716	0.428751
Resection	50	NK cell	Cancer	5	0.653067	0.80264	0.358951
Resection	50	Plasma cell	Cancer	5	0.502226	0.578621	0.258767
Resection	50	T cell	Cancer	5	2.96352	5.48187	2.45157
Resection	50	Treg	Cancer	5	0.488695	0.968183	0.432984
Resection	100	B cell	Cancer	5	1.4216	2.3041	1.03043
Resection	100	Dendritic cell	Cancer	5	2.94981	3.48504	1.55856
Resection	100	Granulocyte	Cancer	5	0.993413	1.54962	0.693012
Resection	100	M1 macrophage	Cancer	5	3.88866	4.89693	2.18997
Resection	100	M2 macrophage	Cancer	5	5.55993	5.43109	2.42886
Resection	100	Monocyte	Cancer	5	1.34305	1.0677	0.477492
Resection	100	NK cell	Cancer	5	0.65007	0.791106	0.353793
Resection	100	Plasma cell	Cancer	5	0.627398	0.729926	0.326433
Resection	100	T cell	Cancer	5	3.46044	6.50145	2.90754
Resection	100	Treg	Cancer	5	0.593214	1.18551	0.530177
Resection	200	B cell	Cancer	5	1.48471	2.39696	1.07195
Resection	200	Dendritic cell	Cancer	5	3.17188	3.80184	1.70023
Resection	200	Granulocyte	Cancer	5	1.09564	1.65474	0.740023
Resection	200	M1 macrophage	Cancer	5	4.22246	5.10153	2.28147
Resection	200	M2 macrophage	Cancer	5	5.62671	5.5936	2.50153
Resection	200	Monocyte	Cancer	5	1.51449	1.11544	0.498841
Resection	200	NK cell	Cancer	5	0.603824	0.788842	0.352781
Resection	200	Plasma cell	Cancer	5	0.659709	0.71244	0.318613
Resection	200	T cell	Cancer	5	3.63605	6.81847	3.04931
Resection	200	Treg	Cancer	5	0.629863	1.23781	0.553564

## Sheet: Table S10
Supplementary Table S10 - Mean percentage of cell types within 50uM intervals of a cancer cell
Condition	Cell Type	Patients n	mean_pct_50um	mean_pct_100um	mean_pct_150um	mean_pct_200um	mean_pct_250um	mean_pct_300um	mean_pct_350um	mean_pct_400um	mean_pct_450um	mean_pct_500um	sd_pct_50um	sd_pct_100um	sd_pct_150um	sd_pct_200um	sd_pct_250um	sd_pct_300um	sd_pct_350um	sd_pct_400um	sd_pct_450um	sd_pct_500um	se_pct_50um	se_pct_100um	se_pct_150um	se_pct_200um	se_pct_250um	se_pct_300um	se_pct_350um	se_pct_400um	se_pct_450um	se_pct_500um
Biopsy	Quiescent fibroblast 1	2	63.9423	79.9631	87.2839	94.309	96.0118	97.4937	99.226	99.8452	100	100	39.2012	26.831	17.4815	7.7138	5.3057	3.46088	1.09459	0.218919	0	0	27.7194	18.9724	12.3613	5.45448	3.7517	2.44721	0.773994	0.154799	0	0
Biopsy	Quiescent fibroblast 2	4	74.4787	89.6067	95.011	97.2743	98.6954	99.378	99.378	99.8046	99.9752	99.9752	27.3107	17.0388	8.97291	5.01484	2.54365	1.17896	1.17896	0.328132	0.049505	0.049505	13.6553	8.51942	4.48645	2.50742	1.27183	0.589481	0.589481	0.164066	0.0247525	0.0247525
Biopsy	Universal fibroblast	4	76.1498	88.4245	92.9915	95.7385	97.0973	98.4236	99.1368	99.8456	99.9956	99.9956	28.209	20.4437	13.4638	8.35981	5.66573	3.08283	1.6914	0.297187	0.00878426	0.00878426	14.1045	10.2218	6.7319	4.17991	2.83287	1.54142	0.845699	0.148594	0.00439213	0.00439213
Biopsy	Transitionary fibroblast	5	83.7398	93.0505	96.6752	97.9505	98.8333	99.432	99.681	99.965	100	100	21.8092	13.2809	7.23201	4.52291	2.57302	1.24628	0.701317	0.0781842	0	0	9.75338	5.93941	3.23425	2.02271	1.15069	0.557354	0.313638	0.034965	0	0
Biopsy	Stress responsive CAF	5	80.9649	91.5474	95.3843	97.3825	98.5693	99.1847	99.6843	99.8681	100	100	26.2034	17.163	10.0762	5.78581	3.13222	1.75652	0.683757	0.294866	0	0	11.7185	7.67552	4.50622	2.58749	1.40077	0.785538	0.305785	0.131868	0	0
Biopsy	MyoCAF	5	87.3135	94.9118	97.4865	98.6863	99.3411	99.6185	99.8007	99.9178	100	100	15.4045	9.48161	5.43373	2.90283	1.4503	0.84153	0.434224	0.172496	0	0	6.8891	4.2403	2.43004	1.29818	0.648596	0.376344	0.194191	0.0771425	0	0
Biopsy	Desmoplastic CAF	5	80.5864	90.9694	95.1102	97.6556	98.6042	99.3932	99.823	100	100	100	25.6136	16.8106	10.2821	5.12149	3.03674	1.35691	0.395764	0	0	0	11.4548	7.51794	4.59829	2.2904	1.35807	0.606827	0.176991	0	0	0
Biopsy	T cell	5	85.0141	93.6014	96.9271	98.1026	98.7339	99.2001	99.5373	99.835	100	100	22.6666	12.7387	6.84395	4.24275	2.83118	1.78853	1.03462	0.368935	0	0	10.1368	5.6969	3.06071	1.89742	1.26614	0.799857	0.462697	0.164993	0	0
Biopsy	Treg	3	82.2534	90.495	94.6157	96.926	98.0104	98.8213	99.2928	99.8586	100	100	28.2753	16.0241	9.17919	5.17805	3.30022	2.04155	1.22493	0.244986	0	0	16.3248	9.2515	5.29961	2.98955	1.90538	1.17869	0.707214	0.141443	0	0
Biopsy	NK cell	4	84.4877	92.4671	95.8827	97.5717	98.4272	99.1032	99.5171	99.862	100	100	24.5515	14.883	8.18235	4.85651	3.1457	1.7936	0.965784	0.275938	0	0	12.2757	7.44149	4.09118	2.42826	1.57285	0.896799	0.482892	0.137969	0	0
Biopsy	B cell	5	85.1837	95.4121	97.5569	98.466	98.9611	99.348	99.5833	99.8512	99.9973	99.9973	19.4421	9.26684	5.44049	3.40771	2.30059	1.4505	0.924159	0.325246	0.0060166	0.0060166	8.69479	4.14426	2.43306	1.52398	1.02886	0.648683	0.413297	0.145455	0.0026907	0.0026907
Biopsy	Plasma cell	5	86.1046	96.9405	98.4162	99.1529	99.337	99.6317	99.7238	99.9632	100	100	13.0966	6.17301	3.54147	1.89427	1.48248	0.823598	0.617698	0.0823598	0	0	5.85699	2.76065	1.58379	0.847145	0.662983	0.368324	0.276243	0.0368324	0	0
Biopsy	M1 macrophage	5	86.8295	99.1383	99.8943	99.945	99.9764	99.9921	99.9921	99.9921	99.9921	100	14.3042	1.57998	0.149045	0.123054	0.0527375	0.0175792	0.0175792	0.0175792	0.0175792	0	6.39703	0.70659	0.0666551	0.0550314	0.0235849	0.00786164	0.00786164	0.00786164	0.00786164	0
Biopsy	M2 macrophage	5	90.4481	97.3527	98.5225	99.0632	99.5892	100	100	100	100	100	13.0441	5.45188	3.20255	2.05415	0.898213	0	0	0	0	0	5.8335	2.43816	1.43222	0.918644	0.401693	0	0	0	0	0
Biopsy	Monocyte	5	90.7013	99.4745	99.8358	99.8723	99.927	99.9453	99.9635	99.9635	99.9635	99.9818	10.5913	0.756161	0.367237	0.285629	0.163217	0.122412	0.0816083	0.0816083	0.0816083	0.0408042	4.73658	0.338165	0.164234	0.127737	0.0729927	0.0547445	0.0364964	0.0364964	0.0364964	0.0182482
Biopsy	Dendritic cell	5	90.1468	96.7697	98.4558	98.9096	99.6175	99.8361	99.9454	100	100	100	9.93413	5.44962	2.98024	2.15216	0.855327	0.366569	0.12219	0	0	0	4.44268	2.43714	1.33281	0.962474	0.382514	0.163934	0.0546448	0	0	0
Biopsy	Granulocyte	4	87.01	93.3755	93.6096	93.6564	96.8282	96.875	96.875	96.875	100	100	16.8567	12.2707	12.4092	12.4388	6.21942	6.25	6.25	6.25	0	0	8.42837	6.13533	6.2046	6.21942	3.10971	3.125	3.125	3.125	0	0
Biopsy	Basal squamous epithelium	5	78.6853	92.8312	96.2384	98.2933	98.6485	99.3539	99.7361	99.9909	99.9909	99.9909	20.8347	9.60646	6.31828	3.34096	2.81013	1.41928	0.56494	0.0204207	0.0204207	0.0204207	9.31756	4.29614	2.82562	1.49412	1.25673	0.634721	0.252649	0.00913242	0.00913242	0.00913242
Biopsy	Cycling basal squamous epithelium	5	78.1334	92.6052	96.8344	98.6377	99.1817	99.5146	99.6043	99.6518	99.7283	99.7863	23.1238	10.121	4.36631	1.97173	1.27793	1.0853	0.884754	0.778583	0.607531	0.477767	10.3413	4.52627	1.95267	0.881787	0.571508	0.48536	0.395674	0.348193	0.271696	0.213664
Biopsy	Differentiating squamous epithelium	5	68.1917	83.8414	88.9772	92.2996	94.9519	96.7626	97.617	98.7021	99.0719	99.3598	35.8895	27.1525	19.2403	13.116	8.56027	5.82947	3.97811	2.90222	2.07526	1.43148	16.0503	12.143	8.60452	5.86564	3.82827	2.60702	1.77906	1.29791	0.928082	0.640178
Biopsy	Barretts-like epithelium	3	76.3198	83.9691	90.285	96.5158	96.7711	99.9149	99.9433	99.9433	99.9433	99.9433	34.8005	25.5157	15.2342	4.90305	5.08539	0.147409	0.0982724	0.0982724	0.0982724	0.0982724	20.0921	14.7315	8.79548	2.83078	2.93605	0.0851064	0.0567376	0.0567376	0.0567376	0.0567376
Biopsy	Endothelium and mural cells	5	83.594	91.9707	95.6555	97.9942	98.8692	99.405	99.7485	99.9326	99.998	100	23.6626	16.1811	9.30503	4.45751	2.52305	1.32499	0.556784	0.145285	0.00442435	0	10.5822	7.2364	4.16134	1.99346	1.12834	0.592555	0.249001	0.0649733	0.00197863	0
Biopsy	undefined	5	79.3224	91.7377	95.2604	97.181	98.1104	98.7795	99.2628	99.6345	99.9691	99.9691	25.9037	15.1383	10.3408	6.21747	4.13952	2.64357	1.56353	0.733904	0.0691211	0.0691211	11.5845	6.77007	4.62453	2.78054	1.85125	1.18224	0.699233	0.328212	0.0309119	0.0309119
Resection	Quiescent fibroblast 1	5	10.7698	24.9422	36.3782	46.4528	54.3896	61.753	68.2847	73.9144	78.3175	82.1554	11.8364	23.8388	28.9351	28.3194	27.0586	24.6766	21.9324	19.6598	18.1067	17.1057	5.29341	10.661	12.9402	12.6648	12.101	11.0357	9.80846	8.79211	8.09757	7.64988
Resection	Quiescent fibroblast 2	5	11.9095	27.4402	40.191	50.1667	58.4212	65.5566	71.441	76.2029	80.1148	83.4616	8.71996	20.5877	26.6573	27.8052	27.2321	25.1473	23.4834	21.6451	20.0709	18.541	3.89968	9.20709	11.9215	12.4349	12.1786	11.2462	10.5021	9.67999	8.976	8.2918
Resection	Universal fibroblast	5	13.1213	24.7657	34.7863	44.1016	51.9817	59.2237	65.7935	71.2424	76.1177	80.2085	19.6367	28.5375	31.0944	29.9781	27.7695	25.4673	23.743	22.3536	21.1078	20.0687	8.78178	12.7624	13.9059	13.4066	12.4189	11.3893	10.6182	9.99682	9.43971	8.975
Resection	Transitionary fibroblast	5	19.1376	31.4635	41.6092	50.1964	57.8045	63.6077	69.1314	73.6092	77.2352	80.3547	20.0263	27.8041	29.9355	29.7165	28.827	27.6712	26.7589	26.1105	25.1471	24.2095	8.95602	12.4344	13.3876	13.2896	12.8918	12.3749	11.9669	11.677	11.2461	10.8268
Resection	Stress responsive CAF	5	22.732	38.6328	49.5686	57.8	64.1391	69.2085	73.8421	77.7368	81.0321	83.7881	14.591	21.647	24.5078	25.358	25.3021	24.9639	23.755	22.5318	21.5046	20.8066	6.52531	9.68083	10.9602	11.3404	11.3155	11.1642	10.6235	10.0765	9.61714	9.30501
Resection	MyoCAF	5	48.0779	59.269	66.5541	71.6534	75.6113	78.883	81.8848	84.3235	86.3299	87.8758	31.4693	30.0789	28.7755	27.6475	26.7058	25.8498	24.1124	22.4407	20.8514	19.4778	14.0735	13.4517	12.8688	12.3644	11.9432	11.5604	10.7834	10.0358	9.32504	8.71075
Resection	Desmoplastic CAF	5	22.1241	38.3424	49.8919	58.5671	65.1442	70.8238	75.6356	79.7977	83.2467	85.8172	10.807	16.7679	22.3245	24.3783	24.6303	23.7617	22.5064	20.6854	18.701	17.1597	4.83306	7.49881	9.98381	10.9023	11.015	10.6265	10.0652	9.2508	8.36333	7.67405
Resection	T cell	5	23.3255	42.3102	54.0268	62.6239	68.0753	72.7237	76.9868	80.3305	83.2233	85.9383	13.436	22.9432	25.8309	25.7583	24.2719	22.2879	20.4327	18.4112	16.8495	15.4736	6.00877	10.2605	11.5519	11.5195	10.8547	9.96743	9.1378	8.23375	7.53531	6.91999
Resection	Treg	5	24.7147	46.5065	58.002	67.02	71.5426	76.3888	79.9886	83.3085	85.413	87.6611	13.9958	21.4341	23.9305	24.285	23.174	21.6917	19.8124	17.6138	15.9143	14.3528	6.2591	9.58562	10.7021	10.8606	10.3637	9.70081	8.86036	7.87713	7.11708	6.41876
Resection	NK cell	5	29.2805	52.9849	65.822	71.1178	75.6392	78.6554	81.5152	83.7363	85.7728	87.2467	18.0877	26.6308	31.2487	28.9525	26.8605	24.3459	22.0082	20.3149	18.6798	17.4416	8.08907	11.9096	13.9748	12.948	12.0124	10.8878	9.84236	9.08509	8.35385	7.80012
Resection	B cell	5	23.2383	42.0347	53.7252	63.0787	68.6727	73.6567	77.336	80.5354	83.5676	85.9258	12.9795	22.0092	25.6098	25.176	24.132	22.3747	20.5828	18.7125	17.2342	15.5522	5.80462	9.8428	11.453	11.2591	10.7922	10.0063	9.20493	8.36849	7.70736	6.95515
Resection	Plasma cell	5	22.9557	43.0386	55.0986	64.0631	70.2823	74.5757	78.6282	81.513	84.3516	86.7658	11.7393	19.6688	22.4203	22.8364	22.072	20.3756	18.8349	17.7734	16.4056	15.1892	5.24999	8.79614	10.0266	10.2127	9.87089	9.11223	8.42322	7.94849	7.33681	6.7928
Resection	M1 macrophage	5	24.8661	42.5598	54.2498	61.7517	67.9851	73.2592	77.4861	80.3771	83.026	85.5738	9.60886	18.4707	22.4551	23.4128	22.8968	21.9471	20.9928	20.3051	19.5461	18.2454	4.29721	8.26037	10.0422	10.4705	10.2397	9.81506	9.38828	9.08071	8.74129	8.15959
Resection	M2 macrophage	5	43.2311	56.1595	63.7537	69.5896	74.1542	78.0248	81.1023	83.5383	85.6145	87.3421	27.8242	28.1775	27.6646	26.7338	25.6988	24.5862	23.4885	22.4884	21.644	20.6589	12.4433	12.6014	12.372	11.9557	11.4928	10.9953	10.5044	10.0571	9.67948	9.23893
Resection	Monocyte	5	19.9544	35.7445	47.2198	56.1876	63.361	69.0552	74.0176	77.6428	80.9419	83.6508	11.7323	20.9669	24.9752	25.5776	24.6359	23.5364	22.2821	21.4254	20.5009	19.9284	5.24686	9.37669	11.1692	11.4386	11.0175	10.5258	9.96486	9.58171	9.16829	8.91226
Resection	Dendritic cell	5	28.187	45.0044	55.6521	63.5045	69.4702	74.114	77.7406	80.8016	83.1899	85.1954	16.6275	23.5084	25.2692	25.5382	24.6722	23.6728	23.1079	22.2828	21.5897	20.9258	7.43606	10.5133	11.3007	11.421	11.0338	10.5868	10.3342	9.96517	9.6552	9.35831
Resection	Granulocyte	5	22.088	40.6426	53.4561	61.6434	67.5165	72.4448	76.3167	79.7903	82.1442	84.6061	9.97008	18.8379	23.6773	24.7099	24.3451	23.6854	21.5114	21.2209	20.5373	19.4088	4.45876	8.42455	10.5888	11.0506	10.8874	10.5925	9.6202	9.49028	9.18457	8.67988
Resection	Basal squamous epithelium	3	7.06991	16.3688	27.9365	41.3049	50.6372	58.6304	64.945	67.5183	69.0338	69.7988	5.46835	12.6153	20.8092	31.4482	37.9211	42.8605	47.2902	48.843	49.0721	48.8926	3.15715	7.28342	12.0142	18.1566	21.8937	24.7455	27.303	28.1995	28.3318	28.2281
Resection	Cycling basal squamous epithelium	3	5.85692	15.28	26.2089	39.2489	49.0025	57.3843	63.6038	65.9052	67.5361	68.6932	5.05372	13.1745	21.1404	30.7807	37.0018	42.3422	47.0882	48.2559	48.5363	48.9852	2.91776	7.6063	12.2054	17.7712	21.363	24.4463	27.1864	27.8606	28.0224	28.2816
Resection	Differentiating squamous epithelium	3	1.3768	6.462	15.3163	30.4957	43.3968	52.1966	58.7191	62.9171	66.3475	68.2595	1.6939	6.66966	13.8502	27.5152	36.9533	42.0814	46.0844	48.4791	50.635	51.3565	0.977974	3.85073	7.99645	15.8859	21.335	24.2957	26.6068	27.9894	29.2341	29.6507
Resection	Barretts-like epithelium	4	15.1081	31.1442	44.5754	54.776	61.8887	66.7133	70.0585	72.5747	74.228	75.3254	9.05849	21.5221	27.9458	32.9809	35.4533	37.3234	38.931	38.6712	37.9501	38.4968	4.52924	10.761	13.9729	16.4905	17.7266	18.6617	19.4655	19.3356	18.9751	19.2484
Resection	Endothelium and mural cells	5	14.7944	25.8986	35.6309	44.0816	51.985	59.0928	65.5038	70.8733	75.3013	78.7749	18.5718	27.1086	30.0476	29.985	28.5496	26.8823	25.4518	24.3194	23.5531	23.1279	8.30555	12.1234	13.4377	13.4097	12.7678	12.0222	11.3824	10.876	10.5333	10.3431
Resection	undefined	5	18.4551	33.9703	45.0526	53.5745	60.5543	66.5282	71.7025	75.9661	79.4678	82.5146	16.8627	24.8661	27.9005	28.2574	27.1585	25.283	23.1117	21.2836	19.6793	18.4152	7.54125	11.1204	12.4775	12.6371	12.1457	11.3069	10.3359	9.51834	8.80087	8.23553

[truncated: 3 more sheets: Table S11, Table S12, Table S13]
