# Supplementary material
Source: Research Square preprint supplement (doi:10.21203/rs.3.rs-10195315/v1)
Supplement: Supplementary file 2 [file 4788983fd06ebb12e2c7006a.pdf]

# 1 Supplementary Methods

## 2 Patient Selection

3 Spatial transcriptomic (CosMx term) profiling was undertaken on FFPE fixed resection  
4 specimens post-neoadjuvant therapy and matched pre-treatment biopsies from 5  
5 patients who had undergone neoadjuvant FLOT based chemotherapy for  
6 oesophageal/GOJ adenocarcinoma in the prior 2 years followed by curative  
7 oesophagectomy. All patients selected had experienced a partial response to therapy  
8 (TRG3) as defined by an NHS pathologist expert in gastro-oesophageal cancer. TRG3 was  
9 selected to provide the balance between areas of response and residual disease and  
10 allow investigation of mechanisms of treatment resistance and recurrence, including  
11 areas of minimally residual disease in fibrosis.

12

## 13 Computational analysis

14

### 15 *Integrated single-cell RNA-seq reference*

16 Reciprocal principal component analysis (RPCA) was used to integrate three published  
17 oesophageal adenocarcinoma (OAC) single-cell or single-nucleus RNA-seq datasets  
18 using Seurat v5.2.0. The datasets comprised 10x Genomics single-cell RNA-seq, Drop-  
19 seq single-cell RNA-seq, and single-nucleus RNA-seq/multiome. RPCA integration was  
20 used for cross-study co-embedding, harmonisation of cell-type annotations, and  
21 construction of a reference atlas.

22 Pre-processed, post-QC expression matrices and metadata were obtained from the  
23 original studies. Because the datasets were generated using different capture platforms  
24 and tissue-processing workflows, study-specific QC procedures were retained rather  
25 than applying a single uniform QC threshold across all datasets. These published QC  
26 pipelines included platform-appropriate filtering of low-complexity cells or nuclei, high  
27 mitochondrial-content barcodes, predicted doublets or empty droplets where  
28 applicable, and sample or library-quality metrics. In the 10x Genomics single-cell RNA-  
29 seq dataset, reported QC included processing of samples with high cell viability, filtering

30 of cells with low or excessively high detected gene counts, removal of cells with high  
31 mitochondrial RNA content, and exclusion of predicted doublets. In the single-  
32 nucleus/multiome dataset, published processing included filtering of low-complexity  
33 nuclei, high mitochondrial-content barcodes, ambient RNA correction, and doublet  
34 detection. For the Drop-seq dataset, post-QC cells from the published analysis were  
35 retained.

36 Where applicable, datasets were subset to retain primary oesophageal tumour and  
37 normal tissue-derived cells, with metastatic samples excluded. Metadata variables,  
38 including tissue source, treatment status, donor, sample, and study of origin, were  
39 harmonised across datasets. Cell-type annotations were standardised into nine broad  
40 lineages: normal epithelium, malignant epithelium, endothelial cells, fibroblasts, and  
41 five immune-cell lineages.

42 Each broad lineage was subsequently analysed independently. Within each lineage,  
43 cells underwent normalisation, principal component analysis, nearest-neighbour graph  
44 construction, clustering, and UMAP visualisation following the recommended Seurat  
45 workflow. Fine-level cell-type identities were assigned using Azimuth and SingleR,  
46 supplemented by manual curation based on established marker-gene expression, prior  
47 biological knowledge, and published literature. Azimuth mapping to the human PBMC  
48 reference was used to support immune-cell annotation and was not used to assign  
49 epithelial, malignant, endothelial, or fibroblast identities.

50

#### 51 *Pre-processing and quality control of CosMx spatial transcriptomics data*

52 CosMx spatial transcriptomics data were analysed independently for each slide to  
53 minimise potential slide-specific batch effects. The dataset comprised five biopsy  
54 samples on one slide and five resection samples distributed across three slides. Pre-  
55 processing and quality control were performed following Bruker's recommended  
56 workflow described in the "Basics of CosMx Analysis in R" vignette.

57 Unique cell identifiers were generated using the prefix "c" followed by slide number, field  
58 of view, and cell number, for example c\_1\_23\_452. These identifiers were applied  
59 consistently across the raw count matrix, metadata, polygon files, and field-of-view  
60 position files.

61 Negative control probes and system control probes were extracted from the raw count  
62 matrix and saved separately for downstream use, including supervised InSituType  
63 annotation. Cells containing fewer than 50 detected transcripts were removed to  
64 exclude low-complexity cells. Cells with a surface area greater than 30,000  $\mu\text{m}^2$  were  
65 also excluded to reduce the inclusion of likely mis-segmented, merged, or otherwise  
66 artefactual cells.

67 A Seurat object was created from the raw count matrix and associated metadata and cell  
68 centroid coordinates were extracted from the metadata and used to construct a  
69 centroid-based spatial feature layer. Coordinates were converted into a spatial field-of-  
70 view object, which was added to the Seurat object as the global spatial layer.

71

### 72 *Cell-type annotation and consensus label generation for CosMx data*

73 To generate robust and reproducible cell-type annotations for the OAC CosMx dataset,  
74 multiple independent annotation frameworks were applied. Their outputs were  
75 harmonised and combined into a consensus cell-type label. This approach was used to  
76 reduce dependence on any single classifier and to integrate complementary evidence  
77 from spatial-platform-aware models, reference mapping, marker-gene classifiers, and  
78 correlation-based annotation.

79

### 80 *Individual annotation methods*

81 Five annotation approaches were used.

82 **InSituType** was run in supervised mode using a pseudo-bulk reference derived from the  
83 integrated scRNA-seq reference. A reference gene-expression matrix was constructed  
84 from the scRNA-seq dataset using genes shared with the CosMx 6,000-plex panel. For  
85 each annotated reference cell type, the top differentially expressed genes were  
86 identified, and the subset overlapping the CosMx panel was retained. These genes were  
87 used to generate pseudo-bulk profiles representing each reference cell type. InSituType  
88 was then run using the raw CosMx counts together with the negative control count  
89 matrix. InSituType was treated as the primary spatial-platform-aware classifier because  
90 it is designed for in situ transcriptomic data, but its predictions were evaluated in  
91 combination with independent classifiers, marker expression, and manual review.

92 **Latent transfer** was performed using Seurat’s anchor-based label transfer framework.  
93 The pre-processed CosMx Seurat object was used as the query and the integrated  
94 scRNA-seq object as the reference. Anchors were identified using 30 principal  
95 components, and reference labels were transferred to CosMx cells. This approach was  
96 used to capture global transcriptomic similarity between CosMx cells and the scRNA-  
97 seq reference while accounting for cross-platform differences.

98 **Garnett** was used as an interpretable marker-gene-based classifier. A hierarchical  
99 marker file was generated for 19 cell types known or expected to occur in OAC, using  
100 established positive and negative marker-gene patterns. Garnett predictions were  
101 included because marker-based classification is relatively interpretable and less  
102 dependent on global cross-platform alignment, although it is constrained by marker  
103 coverage and manual marker selection.

104 **Azimuth** was used for supervised reference mapping of immune populations. The  
105 human PBMC Azimuth reference was used with level 1 cell-type annotations and 30  
106 principal components. Azimuth predictions were used only to support immune-cell  
107 annotation and were not used to classify epithelial, malignant, endothelial, or stromal  
108 cells.

109 **SingleR** was used as a correlation-based annotation method. CosMx expression profiles  
110 were compared with the Human Primary Cell Atlas reference provided through SingleR.  
111 SingleR was included as an independent broad cell-type annotation method because it  
112 performs well for abundant, transcriptionally distinct cell types.

113 Each method generated a predicted cell-type label and, where available, an associated  
114 confidence, probability, or prediction score.

115

### 116 *Label harmonisation*

117 Because the five classifiers produced labels with different naming conventions and  
118 levels of granularity, predicted labels were harmonised to a unified ontology of  
119 approximately 20 biologically interpretable cell classes. These included malignant  
120 epithelial cells, non-malignant epithelial cells, fibroblasts or stromal cells, endothelial  
121 cells, CD4 T cells, CD8 T cells, regulatory T cells, B cells, plasma cells or plasmablasts,  
122 NK cells, myeloid cells, dendritic cells, mast cells, and other or unknown cells.

123 Harmonisation was performed using string matching and regular-expression-based  
124 rules, followed by manual review. Particular attention was given to ambiguous labels,  
125 including plasmacytoid dendritic cells versus plasma cells, broad lymphoid labels  
126 versus specific T- or B-cell annotations, and epithelial versus malignant epithelial  
127 assignments.

128

### 129 **Weighted consensus annotation**

130 To combine predictions from the five classifiers, a weighted-voting scheme was  
131 implemented. For each cell, each classifier contributed support to its predicted  
132 harmonised label. The contribution of classifier  $i$  to label  $l$  was calculated as:

$$133 \quad W_{label} = \sum_i (w_i \times s_i)$$

134 where  $w_i$  is the fixed method weight and  $s_i$  is the classifier-specific confidence score. For  
135 methods that did not provide a continuous confidence score, a score of 1 was assigned  
136 to the predicted label and 0 to all other labels.

137 InSituType predictions were assigned the highest weight,  $w = 3$ , because they were  
138 generated using a CosMx-aware spatial transcriptomic framework. Latent transfer and  
139 Azimuth were assigned intermediate weights,  $w = 2$  and  $w = 1.5$ , respectively,  
140 reflecting their utility for reference-based mapping. SingleR was assigned  $w = 1$ ,  
141 reflecting its broad but less spatially specific correlation-based annotation. Garnett was  
142 assigned  $w = 0.5$  because it relies on manually curated marker sets and does not  
143 provide continuous confidence scores.

144 For each cell, the label with the highest total weighted support was retained as the initial  
145 consensus label. A weighted consensus confidence score was calculated as the support  
146 for the winning label divided by the total support across all candidate labels. In parallel,  
147 an unweighted agreement score was calculated as the proportion of classifiers assigning  
148 the final consensus label. These scores were retained as measures of annotation  
149 confidence.

150

### 151 **Manual annotation refinement**

152 Initial review with a pathologist indicated that most cells annotated as malignant  
153 epithelial cells by the automated pipeline corresponded to malignant regions on

154 matched H&E images. However, some discrepancies were observed. In particular,  
155 subsets of cells initially labelled as lymphoid, epithelial, other, or unknown were located  
156 in regions morphologically consistent with tumour, whereas some cells initially labelled  
157 as malignant epithelial cells appeared inconsistent with malignancy on H&E review.  
158 To refine malignant-cell annotations, a sample-wise manual refinement procedure was  
159 applied. For each sample, cells annotated as malignant epithelial, epithelial, other,  
160 unknown, and any additional cell types suspected to include misclassified malignant  
161 cells were subset. These cells were reprocessed using Seurat, including normalisation,  
162 highly variable feature selection, scaling, PCA, nearest-neighbour graph construction,  
163 clustering, and UMAP visualisation. Cluster marker genes were identified  
164 using FindAllMarkers(). Marker-gene expression, spatial localisation, H&E morphology,  
165 and prior biological knowledge were used to assign each cluster to a broad lineage. Cell  
166 labels were revised when cluster-level evidence supported a different lineage  
167 assignment from the initial consensus annotation.

168

#### 169 *Cell-type annotation and iterative lineage refinement of CosMx data*

170 Cell-type annotation of the CosMx spatial transcriptomics dataset was performed using  
171 a two-stage strategy. First, cells were assigned to broad biological lineages and  
172 iteratively refined based on unsupervised clustering and marker-gene expression.  
173 Second, fine cell-type annotations were generated within each broad lineage using  
174 lineage-restricted supervised InSituType classification.

175

#### 176 *Broad lineage annotation and iterative refinement*

177 CosMx cells were initially assigned to six broad biological compartments: cancer,  
178 epithelial, endothelial and mural, stromal, lymphoid, and myeloid. These broad  
179 compartments were selected to capture the major cellular components of OAC tissue  
180 while minimising over-classification at the initial annotation stage.

181 To refine broad lineage assignments, cells from each compartment were analysed  
182 iteratively. For each broad lineage, cells were subset and reprocessed independently in  
183 Seurat. This included normalisation, identification of variable features, scaling, principal  
184 component analysis, nearest-neighbour graph construction, clustering, and UMAP

185 visualisation. Cluster marker genes were identified using FindAllMarkers() and examined  
186 to determine whether clusters were consistent with their assigned broad lineage.  
187 Clusters showing marker-gene profiles inconsistent with their initial lineage assignment  
188 were reassigned to the appropriate compartment. For example, clusters initially  
189 assigned to lymphoid or other categories but expressing epithelial markers were moved  
190 to the epithelial compartment, whereas clusters expressing canonical fibroblast,  
191 endothelial, mural, myeloid, or lymphoid markers were reassigned accordingly. This  
192 process was repeated iteratively until the major clusters within each broad compartment  
193 showed coherent lineage-specific marker expression.  
194 Broad lineage refinement was guided by canonical marker-gene expression, spatial  
195 localisation, inspection of H&E morphology where available, and prior biological  
196 knowledge of OAC tissue composition. The final broad lineage labels were used as the  
197 basis for subsequent lineage-restricted fine annotation.

198

#### 199 *Lineage-restricted InSituType annotation*

200 Fine cell-type annotation was performed using InSituType in supervised mode. Rather  
201 than applying a single reference containing all cell types to the full CosMx dataset,  
202 InSituType was run separately within each refined broad lineage. For each CosMx  
203 lineage, the corresponding subset of cell types from the integrated scRNA-seq reference  
204 was used to construct a lineage-matched reference. This approach reduced competition  
205 between unrelated cell types and improved the biological specificity of fine annotation  
206 within each compartment.

207 For each lineage-specific InSituType run, the scRNA-seq reference was subset to include  
208 only cell types relevant to the corresponding CosMx broad compartment. For example,  
209 CosMx stromal cells were annotated using only fibroblast reference populations,  
210 including F1–F7 fibroblast states, from the scRNA-seq reference. Similarly, epithelial  
211 CosMx cells were annotated using epithelial reference populations; endothelial and  
212 mural cells were annotated using endothelial, pericyte, and smooth muscle or mural  
213 reference populations; lymphoid cells were annotated using T-cell, B-cell, plasma-cell,  
214 NK-cell, and related lymphoid reference populations; and myeloid cells were annotated

215 using monocyte, macrophage, dendritic-cell, and mast-cell reference populations  
216 where present.

217 For each lineage-specific reference, genes were restricted to those shared between the  
218 scRNA-seq reference and the CosMx 6,000-plex panel. Differentially expressed genes  
219 defining each reference cell type or state were identified from the scRNA-seq reference,  
220 and genes overlapping the CosMx panel were retained. These genes were used to  
221 generate pseudo-bulk expression profiles for each reference cell type or cell state. The  
222 resulting lineage-specific pseudo-bulk matrices were supplied to InSituType together  
223 with the CosMx raw count matrix and negative control count matrix.

224 InSituType was then run independently for each broad CosMx lineage, producing fine  
225 cell-type or cell-state predictions within that lineage only. The final fine annotation for  
226 each CosMx cell was therefore constrained by its manually refined broad lineage. This  
227 prevented, for example, stromal cells from being assigned epithelial or immune labels  
228 and ensured that fine labels were selected only from biologically plausible candidates  
229 within each compartment.

230

### 231 *Final CosMx annotation curation*

232 Following lineage-restricted InSituType annotation, predicted fine labels were reviewed  
233 within each broad compartment. Annotation quality was assessed using marker-gene  
234 expression, spatial distribution, cluster structure, and consistency with the scRNA-seq  
235 reference. Where InSituType predictions were inconsistent with marker expression or  
236 spatial context, annotations were manually reviewed and, where appropriate, adjusted  
237 at the cluster level rather than the individual-cell level.

238 The final CosMx annotation therefore consisted of two linked levels: a refined broad  
239 lineage label and a lineage-restricted fine cell-type or cell-state label. The broad lineage  
240 label was used for compartment-level analyses and tumour-cell selection, whereas the  
241 fine annotation was used to investigate cell-state heterogeneity within epithelial,  
242 stromal, endothelial and mural, lymphoid, and myeloid compartments. Where fine-  
243 grained subtype resolution was limited by low cell numbers, restricted CosMx gene-  
244 panel coverage, or transcriptional similarity between closely related populations,  
245 annotations were collapsed to broader biologically interpretable classes; consequently,

246 not all 34 scRNA-seq reference cell types were resolved in the CosMx data, and closely  
247 related populations such as T-cell subtypes were grouped as “T cells”.

248

#### 249 *Inference of copy-number alteration signal from CosMx expression data*

250 Large-scale copy-number alteration (CNA)-like signal was inferred from cell-level CosMx  
251 spatial transcriptomic profiles using infercnvpy, the Python implementation of the  
252 inferCNV approach. Because this analysis infers CNV signal indirectly from transcript  
253 abundance, results were interpreted as *putative large-scale CNA signal* rather than  
254 direct DNA copy-number calls. infercnvpy estimates CNV-like signal by comparing  
255 expression across genes ordered by genomic position to a reference population,  
256 followed by genomic smoothing, cell-wise centering, noise filtering and median filtering.  
257 Analyses were performed independently for each of the 10 CosMx samples, comprising  
258 five biopsy specimens and five matched post-treatment resections from OAC TRG3  
259 cases. For each sample, genes from the CosMx 6,000-gene panel were annotated with  
260 chromosome and genomic position, restricted to autosomal genes with available  
261 coordinates, and ordered by genomic location. Cell annotations in Mid\_confidence\_fine  
262 were used to define malignant and non-malignant compartments. Cells annotated as  
263 Lymphoid, Myeloid, Endothelial and Stromal were used as the non-malignant reference  
264 population, while cells annotated as Cancer were evaluated for tumour-associated CNV  
265 signal.

266 infercnvpy was run using reference\_key="Mid\_confidence\_fine" and non-malignant  
267 reference categories as above. A running genomic window of 100 genes was used  
268 (window\_size=100), with the default step size of 10 genes unless otherwise specified.  
269 Sex chromosomes were excluded, retaining autosomal CNV profiles. The resulting  
270 smoothed CNV matrix was stored for each sample and visualised as chromosome-  
271 ordered heatmaps grouped by cell annotation. The infercnvpy documentation lists  
272 window\_size=100, step=10, dynamic\_threshold=1.5 and exclusion of chrX/chrY as  
273 defaults, so this wording is appropriate if you did not override those parameters.

274 For downstream summarisation, a per-cell CNV amplitude score was calculated as the  
275 mean absolute CNV signal across all inferred genomic windows:

277

$$\text{CNV amplitude}_i = \frac{1}{W} \sum_{w=1}^W |X_{iw}|$$

276

278 where  $X_{iw}$  is the inferred CNV signal for cell  $i$  in genomic window  $w$ , and  $W$  is the total  
279 number of inferred windows. This score was used to compare CNV burden across  
280 annotated cell types and to visualise the distribution of CNV signal in cancer versus non-  
281 malignant populations.

282

### 283 *Identification and spatial mapping of malignant transcriptional programmes*

#### 284 *Selection of malignant cells from the scRNA-seq reference*

285 Malignant epithelial cells were selected from the harmonised single-cell RNA-seq  
286 reference using the consensus cancer-cell annotation. The RPCA-integrated object was  
287 used only to define harmonised cell identities and metadata. All transcriptional  
288 programme discovery was performed using the uncorrected RNA assay count matrix.

289 To minimise the influence of low-quality or poorly represented donors, only donors with  
290 at least 50 malignant epithelial cells were retained. To prevent donors with very large  
291 malignant-cell numbers from dominating downstream analyses, a maximum of 500  
292 malignant cells per donor was randomly sampled using a fixed random seed. Donor,  
293 dataset, sequencing platform, treatment status, and tissue-source metadata were  
294 retained for downstream assessment of potential biological and technical associations  
295 with inferred programmes.

296 Protein-coding genes were retained based on Ensembl annotations obtained using  
297 biomaRt. Mitochondrial genes and ribosomal genes were excluded to reduce technical  
298 and housekeeping-driven variation. Raw UMI counts were extracted from the RNA assay  
299 and library-size normalised to counts per million (CPM). CPM values were log<sub>1p</sub>-  
300 transformed for variance estimation. Highly variable genes were identified by gene-wise  
301 variance across the log<sub>1p</sub>-transformed CPM matrix, and the top 3,000 genes were  
302 retained for NMF. For NMF input, the selected log<sub>1p</sub>-transformed CPM matrix was  
303 transformed back to linear scale using `expm1`, yielding a non-negative CPM-scale gene-  
304 by-cell matrix.

305

### 306 *Consensus non-negative matrix factorisation*

307 Non-negative matrix factorisation was performed using the Brunet multiplicative-update  
308 algorithm implemented in the NMF R package. The expression matrix, with genes as rows  
309 and cells as columns, was factorised into a gene-by-programme matrix  $W$  and a  
310 programme-by-cell matrix  $H$ . Factorisation was performed for ranks  $k = 4$  to  $k = 10$ . For  
311 each rank, 50 random initialisations were performed, with a maximum of 400 iterations  
312 per run.

313 For each run, the  $W$  matrix was extracted and column-normalised so that gene weights  
314 for each programme summed to one. To identify stable consensus  
315 programmes,  $W$  matrices from all runs at a given rank were concatenated, and pairwise  
316 cosine similarity was calculated between programmes. Programmes were clustered  
317 using hierarchical clustering on cosine distance, defined as  $1 - \text{cosine similarity}$ , with  
318 average linkage. The dendrogram was cut into  $k$  clusters, and consensus programmes  
319 were defined by averaging gene weights across programmes within each cluster,  
320 followed by column normalisation.

321

### 322 *Selection of optimal factorisation rank*

323 Programme stability was evaluated across values of  $k$  by calculating the mean within-  
324 cluster cosine similarity of programmes across independent NMF runs. This metric  
325 reflects the reproducibility of inferred transcriptional programmes across random  
326 initialisations. Candidate ranks were also assessed for biological interpretability,  
327 pathway enrichment, top-weighted marker genes, and distribution of programme usage  
328 across donors, datasets, and sequencing platforms.

329 Based on the balance between programme stability, interpretability, and avoidance of  
330 donor- or platform-dominated factors,  $k = 5$  was selected for downstream analyses.

331

### 332 *Scoring scRNA-seq malignant cells for consensus programmes using AUCell*

333 To map cNMF-derived tumour transcriptional programmes onto malignant cells from the  
334 scRNA-seq reference, a rank-based enrichment strategy was implemented using  
335 AUCell. The consensus  $W$  matrix containing five tumour programmes was used to define

336 programme-specific gene sets. For each programme, genes were ranked by consensus  
337 weight, and the top 50 genes were selected as the initial programme gene set.

338 To reduce redundancy between programmes and improve specificity of programme  
339 scoring, gene overlap across the five programme gene sets was quantified. Genes  
340 assigned to more than one programme were removed, retaining only genes uniquely  
341 associated with a single programme. These refined non-overlapping gene sets were used  
342 for AUCell scoring.

343 Raw RNA assay counts from malignant scRNA-seq cells were library-size normalised to  
344 CPM. Gene-expression rankings were generated for each cell  
345 using `AUCell_buildRankings()`, with block-wise ranking enabled to improve memory  
346 efficiency. Programme enrichment was quantified using `AUCell_calcAUC()`, which  
347 calculates the area under the curve for each programme gene set within each cell's  
348 ranked gene list. The maximum rank considered for AUC calculation was restricted to the  
349 top 100 genes per cell to prioritise highly expressed genes and reduce the influence of  
350 low-level noise. The resulting AUCell scores were stored as cell-by-programme  
351 metadata in the Seurat object.

352 Because AUCell scores are relative to each cell's ranked expression distribution and may  
353 vary between datasets, AUC values were z-score normalised within cohort prior to  
354 categorical programme assignment. For each cell, the programme with the highest z-  
355 scored AUCell value was designated as the candidate dominant programme. To avoid  
356 forced assignment of weak or ambiguous programme states, two additional criteria were  
357 applied: a minimum z-score of 1.0 for the top programme and a minimum margin of 0.25  
358 between the highest and second-highest z-scored programme scores. Cells failing the z-  
359 score threshold and margin criterion were labelled ambiguous. Cells satisfying both  
360 criteria were assigned a final AUCell-based tumour programme label.

361

### 362 *Hallmark enrichment of consensus cNMF programmes (fgsea)*

363 Hallmark pathway enrichment was performed directly on the consensus cNMF gene-  
364 programme matrix (consensus W), treating each programme as a ranked gene list.  
365 Consensus W (genes × programmes) was loaded from the cNMF output and gene  
366 identifiers were verified to be HGNC gene symbols matching MSigDB naming. Hallmark

367 gene sets were obtained using msigdb (species = Homo sapiens, category = “H”) and  
368 converted into a list of pathways (each pathway containing its member gene symbols).  
369 For each cNMF programme, genes were ranked by their consensus W weight in that  
370 programme (decreasing order) and used as the statistic vector for enrichment testing.  
371 Enrichment testing was performed using fgseaMultilevel (from the fgsea package), which  
372 estimates enrichment without requiring a fixed permutation count and is stable for long  
373 ranked lists. For each programme, we retained enrichment results with associated NES  
374 and Benjamini-Hochberg adjusted P values (FDR).

375

### 376 *Transcription factor activity analysis of cNMF tumour programmes*

377 Transcription factor activity was inferred for the five malignant transcriptional  
378 programmes using DoRothEA regulons and the decoupleR framework. Malignant cells  
379 assigned to one of the five cNMF tumour programmes by AUCell were selected from the  
380 scRNA-seq reference. Cells labelled as ambiguous were excluded from this analysis.

381 For each programme, RNA expression was aggregated across all malignant cells  
382 assigned to that programme using Seurat’s AggregateExpression() function with the RNA  
383 assay and log-normalised expression values from the data slot. This produced a gene-  
384 by-programme expression matrix representing the average transcriptional profile of each  
385 cNMF programme.

386 Transcription factor activities were inferred using run\_mlm() from decoupleR with the  
387 human DoRothEA regulon database. DoRothEA confidence levels A, B, and C were  
388 retained to balance regulon confidence and coverage. The regulon network was  
389 restricted to target genes present in the aggregated scRNA-seq expression matrix.

390 Transcription factors with fewer than 10 measured target genes were excluded. For each  
391 transcription factor, decoupleR’s multivariate linear model estimated an activity score  
392 for each cNMF programme based on the expression of its signed target-gene regulon.

393 To identify transcription factors preferentially active in each tumour programme, a  
394 programme-specificity score was calculated for each transcription factor and  
395 programme. For a given transcription factor  $t$  and programme  $p$ , specificity was defined  
396 as:

$$397 \quad \textit{Specificity}(t,p) = \textit{Activity}(t,p) - \textit{mean}(\textit{Activity}(t,q))$$

398 where  $q$  represents all other cNMF programmes. For each programme, the top 15  
399 transcription factors with the highest specificity scores were selected. The union of these  
400 programme-specific transcription factors was retained for visualisation.

401 For the heatmap shown in panel f, transcription factor activity scores for the selected  
402 transcription factors were extracted across the five cNMF programmes and z-score  
403 scaled across programmes for each transcription factor. This row-wise scaling was used  
404 to visualise the relative activity pattern of each transcription factor across tumour  
405 programmes. Heatmaps were generated using ComplexHeatmap, with cNMF  
406 programmes displayed as columns and transcription factors as rows.

407

#### 408 *Selection of representative programme genes*

409 To provide a compact and interpretable summary of gene-level drivers for each  
410 programme, representative genes were selected from the consensus  $W$  matrix using a  
411 combined weight-and-specificity criterion. For each gene  $g$  and programme  $p$ , a  
412 specificity ratio was calculated as:

$$414 \quad \textit{Specificity}(g, p) = \frac{W_{g,p}}{\max_{q \neq p} (W_{g,q}) + \epsilon}$$

413

415 where  $W_{g,p}$  is the consensus weight of gene  $g$  in programme  $p$ ,  $q$  indexes all other  
416 programmes, and  $\epsilon$  is a small constant to avoid division by zero. Genes were ranked  
417 within each programme using the combined score:

$$419 \quad \textit{Score}(g, p) = W_{g,p} \times \textit{Specificity}(g, p)$$

418

420 For each programme, representative genes were selected by prioritising genes with high  
421 combined scores, programme-specific weighting, and biological relevance. Where  
422 genes were highlighted in the Results section and were present in the  $W$  matrix, they  
423 were preferentially included, and remaining slots were filled using the highest-ranked  
424 genes by the combined weight-specificity score. Four to six representative genes were  
425 selected per programme.

426

## 427 *Summarising programme phenotypes across mechanistic axes*

428 To summarise each tumour programme's biological phenotype, a set of mechanistic  
429 axes was defined a priori. These axes included proliferation, interferon response, MHC  
430 class I antigen presentation, stress or AP-1 activation, Notch-associated plasticity,  
431 polarity or junctional organisation, secretory differentiation, and regenerative repair.  
432 Each axis was represented by a compact gene set selected based on pathway biology,  
433 marker coherence, and relevance to epithelial tumour-cell states.  
434 Axis scores were calculated per cell using Seurat's `AddModuleScore()`, with each  
435 mechanistic gene set scored against matched control features. Axis scores were  
436 summarised across cells assigned to each tumour programme using the median. For  
437 comparability across programmes, median axis scores were scaled to the unit interval  
438 from 0 to 1 across programmes for each axis:

$$440 \quad x' = \frac{x - \min(x)}{\max(x) - \min(x) + \epsilon}$$

439

441 where  $x$  is the median axis score and  $\epsilon$  is a small constant to avoid division by zero. Radar  
442 plots were generated using the scaled axis values, with axes and scaling held constant  
443 across all programmes to enable direct comparison of phenotypic profiles.

444

## 445 *Projection of tumour transcriptional programmes into CosMx spatial data*

### 446 *CosMx malignant-cell processing for programme projection*

447 CosMx spatial transcriptomics data were subset to include high-confidence malignant  
448 epithelial cells based on the final consensus and manually refined annotations. Raw UMI  
449 count matrices were extracted from the RNA assay with genes as rows and cells as  
450 columns. To ensure compatibility with the scRNA-seq-derived cNMF programmes,  
451 CosMx counts were normalised to CPM without log-transformation, preserving non-  
452 negativity for downstream NNLS projection.

453 Only genes shared between the CosMx panel and the consensus cNMF  $W$  matrix were  
454 retained. The consensus programme matrix was subset to this shared gene set, and  
455 programme columns were re-normalised after subsetting to account for differences in  
456 gene coverage between whole-transcriptome scRNA-seq and targeted CosMx profiling.

457

#### 458 *Projection of cNMF programmes onto CosMx data using non-negative least squares*

459 Consensus cNMF programmes derived from scRNA-seq malignant cells were projected  
460 onto individual CosMx malignant cells using non-negative least squares regression.  
461 NNLS was used rather than retraining NMF on the spatial data, allowing the scRNA-seq-  
462 derived tumour programmes to be transferred into spatial coordinates while avoiding the  
463 introduction of additional latent structure from the lower-complexity CosMx panel.

464 For each CosMx cell, its CPM-normalised expression vector  $x$  was modelled as a non-  
465 negative linear combination of the consensus programmes:

$$466 \quad x \approx Wh$$

467 where  $W$  is the shared-gene consensus programme matrix and  $h$  is the vector of non-  
468 negative programme usage coefficients for that cell. NNLS regression was performed  
469 independently for each cell using the nnls R package. The resulting coefficients were  
470 retained as continuous programme-usage scores. Where relative programme  
471 composition was required, coefficients were normalised per cell to sum to one.

472 Unlike simple correlation or matrix multiplication, NNLS constrains programme  
473 contributions to be non-negative and additive. This makes it suitable for estimating the  
474 contribution of multiple transcriptional programmes within each CosMx cell while  
475 preserving interpretability of programme usage scores.

476

#### 477 *AUCell scoring of tumour programmes in CosMx data*

478 As a complementary approach to NNLS-based programme projection, CosMx malignant  
479 cells were scored using AUCell. The same refined, non-overlapping programme gene  
480 sets used for scRNA-seq scoring were applied to the CosMx data, restricted to genes  
481 present in the CosMx panel.

482 AUCell rankings were generated for each CosMx cell, and programme enrichment was  
483 quantified using `AUCell_calcAUC()` with the same maximum-rank parameter used for  
484 scRNA-seq scoring. AUCell scores were z-score normalised within each sample to  
485 account for sample-specific variation in transcript detection, segmentation, and local  
486 RNA density. Dominant programme labels were assigned using the same z-score and  
487 margin criteria applied to the scRNA-seq data.

488 AUCell was used as a rank-based measure of programme identity, whereas NNLS was  
489 used to estimate continuous programme usage. Using both approaches enabled  
490 categorical assignment of dominant tumour-cell state together with quantitative  
491 assessment of programme composition.

492

#### 493 *Spatial visualisation of tumour transcriptional programmes*

494 Programme usage scores, dominant programme assignments, assignment confidence,  
495 and ambiguity status were visualised in tissue coordinates across CosMx sections.  
496 Spatial maps were generated using cell centroid coordinates and overlaid with tumour  
497 programme labels or continuous programme scores. These visualisations were used to  
498 assess spatial organisation of malignant transcriptional states, intra-tumoural  
499 heterogeneity, co-localisation of programmes, and boundary regions between  
500 transcriptionally distinct tumour compartments.

501 Where relevant, spatial programme distributions were compared with H&E morphology,  
502 manually refined malignant annotations, and local tissue architecture to support  
503 biological interpretation of tumour-cell states in situ.

504

#### 505 *Spatial autocorrelation analysis using Moran's I*

506 Spatial autocorrelation of malignant cNMF programme activity was assessed in CosMx  
507 spatial transcriptomics data using global Moran's I. Cancer cells were identified using  
508 the final refined cell-type annotation and were defined as cells labelled "Cancer". Cell  
509 centroid coordinates were extracted from the CosMx metadata and converted from  
510 pixels to micrometres using a scaling factor of 0.12  $\mu\text{m}$  per pixel. Only cells from retained  
511 fields of view were included in the analysis.

512 Analyses were performed on continuous cNMF programme scores rather than  
513 thresholded programme labels. This preserved the full range of programme activity and  
514 allowed Moran's I to test whether neighbouring cancer cells had similar levels of each  
515 transcriptional programme.

516 For each analysis group, cancer-cell centroid coordinates were used to construct a  
517 spatial neighbour graph. Each cancer cell was connected to its eight nearest  
518 neighbouring cancer cells using a k-nearest-neighbour approach. The neighbour graph

519 was converted to a row-standardised spatial weights matrix. Global Moran's I was then  
520 calculated separately for each continuous cNMF programme score using the spdep R  
521 package. Positive Moran's I values were interpreted as evidence that neighbouring  
522 cancer cells had similar programme activity, consistent with spatial clustering of that  
523 malignant transcriptional state. Values close to zero indicated limited spatial  
524 autocorrelation.

525 Statistical significance was assessed using both the analytical Moran's I test and a  
526 Monte Carlo permutation-based Moran's I test. Analytical tests were performed  
527 using `spdep::moran.test()`. For the Monte Carlo test, `spdep::moran.mc()` was used with  
528 1,000 permutations. In each permutation, cNMF programme scores were randomly  
529 reassigned across the fixed cancer-cell spatial graph, preserving the cell coordinates  
530 and neighbour relationships while disrupting the association between spatial position  
531 and programme activity. The observed Moran's I statistic was compared with this  
532 permutation-derived null distribution to obtain an empirical P value. P values were  
533 adjusted across the five cNMF programmes using the Benjamini-Hochberg false  
534 discovery rate procedure.

535

### 536 *Comparison of cNMF tumour programme activity between paired biopsies and* 537 *resections*

538 To compare malignant transcriptional programme activity between diagnostic biopsies  
539 and matched resections, CosMx objects from five paired OAC cases were analysed.  
540 High-confidence malignant epithelial cells were used for the comparison. For each cell,  
541 cNMF programme activity scores were extracted from the metadata and converted to  
542 long format, producing a cell-by-programme table containing patient, condition, sample  
543 identifier, programme, and programme score.

544 For visualisation of the cell-level distribution of programme activity, programme scores  
545 were plotted by condition using violin plots with overlaid boxplots. These plots show the  
546 distribution of single-cell cNMF programme scores across biopsy and resection samples  
547 for each programme. Mean differences between resection and biopsy scores were  
548 calculated for each programme and displayed as  $\Delta$  values, where positive values  
549 indicate higher scores in resection samples.

550 To account for the paired patient structure, per-patient summaries were calculated for  
551 each condition and programme. For each patient, condition, and cNMF programme, the  
552 median programme score across malignant cells was calculated. These paired patient-  
553 level medians were visualised using connected line plots, with each line representing  
554 one patient and showing the change from biopsy to matched resection. Paired Wilcoxon  
555 signed-rank tests were used to compare biopsy and resection median programme  
556 scores for each cNMF programme. P values were adjusted across the five programmes  
557 using the Benjamini-Hochberg false discovery rate procedure.

558 As an additional cell-level analysis accounting for repeated sampling within patients,  
559 linear mixed-effects models were fitted separately for each cNMF programme.  
560 Programme score was modelled as a function of condition, with biopsy as the reference  
561 level and patient included as a random intercept:

562

$$564 \quad \text{Score}_{ij} = \beta_0 + \beta_1 \text{Condition}_{ij} + u_{\text{patient}} + \epsilon_{ij}$$

563

565 where  $\beta_1$  estimates the change in programme score in resection relative to biopsy.  
566 Models were fitted using the lme4 R package. For each programme, the condition effect  
567 was reported as the estimated resection-minus-biopsy change with an approximate 95%  
568 confidence interval calculated as estimate  $\pm$  1.96  $\times$  standard error. Statistical  
569 significance was assessed by comparing the full model with a null model lacking the  
570 condition term using a likelihood ratio test. P values were adjusted across programmes  
571 using the Benjamini-Hochberg method.

572 The violin plots were used to display the single-cell distribution of cNMF programme  
573 activity, the paired line plots were used to show patient-level biopsy–resection changes,  
574 and the mixed-effects model was used to estimate the overall condition effect while  
575 accounting for inter-patient variation.

576

### 577 *Spatial niche identification and cancer-centred neighbourhood analysis*

578 Spatial niche analysis was performed using the final annotated CosMx Seurat objects.  
579 For the analyses shown in panels c–f, resection samples were used. Cell centroid  
580 coordinates were extracted from the CosMx metadata using the global x and y pixel

581 coordinates and converted to micrometres using a scaling factor of 0.12  $\mu\text{m}$  per pixel.  
582 Cell identities were taken from the final refined annotation.

583

#### 584 *Unsupervised spatial niche identification*

585 To identify recurrent multicellular neighbourhoods within individual tissue sections,  
586 unsupervised niche analysis was performed using Seurat's BuildNicheAssay() function.  
587 For each selected CosMx section, a niche assay was constructed using final refined cell-  
588 type annotations as the categorical input. For each cell, the local cellular neighbourhood  
589 was defined using its 30 nearest spatial neighbours. The composition of these local  
590 neighbourhoods was encoded as a cell-type count matrix and clustered into discrete  
591 spatial niches.

592

593 Spatial niche labels were mapped back onto the tissue coordinates and visualised using  
594 ImageDimPlot(). To interpret the cellular composition of each niche, the niche count  
595 matrix was extracted and converted to neighbourhood cell-type proportions. For each  
596 niche, the mean local cell-type composition was compared with the background cell-  
597 type frequency across the section. Cell-type enrichment within each niche was  
598 quantified using Fisher's exact tests on aggregated neighbourhood cell-type counts. P  
599 values were adjusted using the Benjamini-Hochberg method, and cell types with FDR <  
600 0.05 and log<sub>2</sub> fold enrichment greater than log<sub>2</sub>(1.5) were considered enriched. Enriched  
601 cell types were used to annotate the dominant cellular constituents of each niche.

602

#### 603 *Selection of spatial niche number*

604 The number of spatial niche clusters was selected using a data-driven assessment of  
605 clustering performance across candidate values of  $k$ . For each CosMx section, spatial  
606 niche features were first generated using Seurat's BuildNicheAssay() function with final  
607 refined cell-type annotations as input. Local neighbourhoods were defined using the 30  
608 nearest neighbours of each cell. The resulting niche assay encoded, for each cell, the  
609 composition of its local cellular neighbourhood.

610 To evaluate the optimal number of niche clusters, candidate values from  $k = 2$  to  $k =$   
611 10 were tested. For each candidate  $k$ , k-means clustering was applied to the niche

612 composition matrix using 50 random starts. Prior to clustering, the niche matrix was  
613 filtered to remove cells with zero neighbourhood counts and was scaled across features.  
614 Clustering performance was assessed using total within-cluster sum of squares,  
615 between-cluster sum of squares, the ratio of between-cluster sum of squares to total  
616 sum of squares, average silhouette width, and minimum and maximum cluster size.  
617 To assess clustering robustness, repeated k-means runs were performed for each  
618 candidate  $k$ , and pairwise adjusted Rand indices were calculated between replicate  
619 cluster assignments. The mean adjusted Rand index was used as a stability metric.  
620 Candidate niche numbers were ranked by average silhouette width, clustering stability,  
621 and parsimony, with a small penalty applied to larger values of  $k$ . The selected niche  
622 number was then used to rebuild the final niche assay using BuildNicheAssay(), and the  
623 resulting niche labels were mapped back to spatial coordinates for visualisation.  
624 Elbow plots of total within-cluster sum of squares and line plots of average silhouette  
625 width and clustering stability were inspected to support the final selection of niche  
626 number. Final niche numbers were chosen to balance statistical separation, clustering  
627 stability, cluster size, and biological interpretability of the resulting spatial patterns.

628

### 629 Cancer-centred radius-based neighbourhood composition

630 To quantify the cellular composition surrounding malignant epithelial cells, a cancer-  
631 centred neighbourhood analysis was performed across the resection samples. Cancer  
632 cells were defined as cells labelled “Cancer” in the final refined annotation. For each  
633 sample, Euclidean distances were calculated from each cancer-cell centroid to  
634 neighbouring cells using the global micrometre coordinates.

635 For each cancer cell, fixed-radius neighbourhoods were defined at radii of 10, 25, 50, 75,  
636 100, and 200  $\mu\text{m}$  using dbSCAN::frNN(). The central cancer cell itself was excluded from  
637 its own neighbourhood. For each radius, the proportion of neighbouring cells belonging  
638 to each fibroblast or immune subtype was calculated as:

$$640 \quad \%_{celltype} = \frac{n_{celltype \text{ within radius}}}{n_{all \text{ neighbours within radius}}} \times 100$$

639

641 where the denominator included all neighbouring cells within the radius, excluding the  
642 index cancer cell. This generated a per-cancer-cell neighbourhood composition profile  
643 for each radius.

644 For each sample, percentages were averaged across all cancer cells to obtain a sample-  
645 level mean percentage for each cell type and radius. Sample-level values were then  
646 averaged across resection samples to generate curves.

647 Fibroblast subtypes included quiescent fibroblast 1, quiescent fibroblast 2, universal  
648 fibroblast, transitional fibroblast, stress responsive CAF, MyoCAF, and desmoplastic  
649 CAF. Immune subtypes included T cells, Tregs, NK cells, B cells, plasma cells, M1  
650 macrophages, M2 macrophages, monocytes, dendritic cells, and granulocytes. Curves  
651 were plotted using ggplot2, with radius in micrometres on the x-axis and the mean  
652 percentage among neighbours on the y-axis.

653

#### 654 *Distance-to-cancer analysis of non-malignant cell types*

655 To assess the spatial proximity of stromal and immune populations to malignant  
656 epithelial cells, nearest-neighbour distances to cancer cells were calculated for all non-  
657 cancer cell types in resection samples. Cell centroid coordinates were extracted from  
658 the global CosMx coordinate metadata and converted from pixels to micrometres using  
659 a scaling factor of 0.12  $\mu\text{m}$  per pixel.

660 For each resection sample, the Euclidean distance from every cell to its nearest cancer  
661 cell was calculated using the get.knnx() function from the FNN R package. Distances  
662 were calculated independently within each sample to avoid measuring distances across  
663 separate tissue sections. For each non-cancer cell type, empirical cumulative  
664 distribution functions were generated from the distribution of nearest-cancer distances  
665 within each sample. ECDF values were evaluated over a regular distance grid from 0 to  
666 500  $\mu\text{m}$  in 5  $\mu\text{m}$  increments.

667 To summarise distance distributions across samples, ECDF values were averaged  
668 across resection samples for each cell type and distance. The resulting curves show, for  
669 each distance threshold, the mean fraction of cells of a given type located within that  
670 distance of the nearest cancer cell. MyoCAFs and M2 macrophages were highlighted,  
671 while other non-cancer cell types were shown in grey. This analysis was used to compare

672 the relative proximity of MyoCAFs, M2 macrophages, and other stromal or immune cell  
673 types to malignant epithelial regions.

674

#### 675 *Tri-cell cancer–fibroblast–immune niche analysis*

676 To quantify whether cancer cells were embedded in multicellular niches containing both  
677 fibroblast and immune populations, a tri-cell neighbourhood analysis was performed.  
678 Cancer cells were used as anchor cells. For each cancer cell, fixed-radius  
679 neighbourhoods were queried to determine whether at least one fibroblast subtype and  
680 at least one immune-cell subtype were present within the specified radius.

681 Fibroblast subtypes included quiescent fibroblast 1, quiescent fibroblast 2, universal  
682 fibroblast, transitional fibroblast, stress responsive CAF, MyoCAF, and desmoplastic  
683 CAF. Immune subtypes included T cells, Tregs, NK cells, B cells, plasma cells, M1  
684 macrophages, M2 macrophages, monocytes, dendritic cells, and granulocytes. Cancer  
685 cells were also stratified by cNMF tumour programme where relevant.

686 For each sample, radius-based neighbour searches were performed using  
687 `dbscan::frNN()` on cell centroid coordinates in micrometres. For every cancer cell, binary  
688 indicators were recorded for whether a given fibroblast subtype was present within the  
689 radius and whether a given immune subtype was present within the same radius. A tri-  
690 cell niche was defined as a cancer cell for which both conditions were true:

691

$$692 \quad \text{TriCellNiche} = \text{hasFibroblastSubtype} \cap \text{hasImmuneSubtype}$$

692

694 For each sample, patient, condition, cancer programme, fibroblast subtype, immune  
695 subtype, and radius, the percentage of cancer cells in a tri-cell niche was calculated as:

696

$$698 \quad \%TriCellNiche = \frac{n_{\text{cancer cells with both fibroblast and immune neighbour}}}{n_{\text{cancer cells}}} \times 100$$

697

699 For the analysis shown in panel h, the model focused on MyoCAF-containing tri-cell  
700 niches. The outcome was the percentage of cancer cells with both a MyoCAF and a given  
701 immune-cell subtype nearby. To determine whether M2 macrophages were  
702 preferentially associated with MyoCAF-containing cancer niches after accounting for

703 differences in cell-type abundance, a linear mixed-effects model was fitted using lme4.  
704 The model included immune-cell subtype, fibroblast subtype, cancer programme,  
705 immune-cell abundance, fibroblast abundance, and cancer-programme abundance as  
706 fixed effects, with patient included as a random intercept:

```
707  
709 %TriCellNiche  
710     ~ ImmuneSubtype + FibroblastSubtype + CancerProgram  
711     + scale(%Immune) + scale(%Fibroblast) + scale(%CancerProgram)  
712     + (1 | Patient)
```

708  
713 M2 macrophage was used as the reference immune subtype. Sample-level immune,  
714 fibroblast, and cancer-programme abundances were calculated as the percentage of all  
715 cells in each sample assigned to the corresponding class and were included as scaled  
716 covariates. Estimated marginal means were calculated using emmeans to obtain  
717 abundance-adjusted tri-cell niche frequencies for each immune subtype, allowing  
718 comparison of M2 macrophages with other immune populations while accounting for  
719 sample-level cell-type abundance and patient structure.

720

#### 721 *CellPhoneDB ligand–receptor analysis of the cancer–MyoCAF–M2 macrophage niche*

722 Cell–cell communication analysis was performed on the integrated single-cell RNA-seq  
723 reference using CellPhoneDB. Cancer cells were stratified by their dominant cNMF  
724 tumour programme, generating five malignant sender/receiver groups corresponding to  
725 the Immune-primed, Proliferative, Invasive, Stress repair, and Stress adapted  
726 programmes. Stromal and immune populations of interest were defined from the fine  
727 cell-type annotations.

728 CellPhoneDB was run using the single-cell expression matrix and corresponding cell-  
729 group metadata. The resulting ligand–receptor interaction table was exported in long  
730 format, retaining source cell type, target cell type, ligand gene, receptor gene, interacting  
731 pair, CellPhoneDB classification, significant mean, and interaction score. Downstream  
732 analysis focused on interactions involving the tri-cell niche of interest: cNMF-defined  
733 cancer programmes, MyoCAFs, and M2 macrophages.

734 Interactions were filtered to retain directed edges between cancer programmes and  
735 MyoCAFs, cancer programmes and M2 macrophages, and reciprocal MyoCAF–M2  
736 macrophage interactions. Self-interactions within the same stromal or immune  
737 population were excluded..

738 To aid biological interpretation, ligand–receptor interactions were collapsed into  
739 manually curated pathway categories using the CellPhoneDB classification field and  
740 ligand/receptor gene identities. Interactions were assigned to the following pathway  
741 classes: WNT/RSPO, BMP, TGF-beta, FGF, NOTCH, Myeloid-conditioning, Immune  
742 evasion, HGF/MET, EGFR/ERBB, and ECM/integrin. Interactions that did not match these  
743 predefined categories were retained as “Other” where appropriate.

744 For global visualisation of the niche communication network, directed chord diagrams  
745 were generated using circlize. Cell sectors represented cNMF cancer programmes,  
746 MyoCAFs, and M2 macrophages. Links represented directed ligand–receptor  
747 interactions between source and target populations and were coloured by pathway  
748 class. Chord diagrams were generated either using the number of interactions per cell-  
749 pair/pathway or the summed CellPhoneDB interaction score.

750 To summarise pathway-level communication patterns, interactions were aggregated by  
751 directed cell pair and pathway. For each source–target pair, the number of interactions  
752 and the summed CellPhoneDB interaction score were calculated for each pathway.  
753 Summed interaction scores were log<sub>1p</sub>-transformed for heatmap visualisation.  
754 Heatmaps were generated using pheatmap, with rows representing directed cell pairs  
755 and columns representing pathway classes. Directed cell-pair ordering was fixed to  
756 show cancer-to-MyoCAF, cancer-to-M2 macrophage, MyoCAF-to-cancer, MyoCAF-to-  
757 M2 macrophage, M2 macrophage-to-cancer, and M2 macrophage-to-MyoCAF  
758 interactions.

759 To compare the overall number of interactions sent or received by each tumour  
760 programme, CellPhoneDB interactions were summarised by source and target group.  
761 For each cNMF cancer programme, the number of outgoing interactions to MyoCAFs and  
762 M2 macrophages was calculated, as was the number of incoming interactions from  
763 MyoCAFs and M2 macrophages. These counts were visualised as column-scaled  
764 heatmaps to highlight relative sending and receiving patterns across tumour  
765 programmes.

766

767 *Curated ligand–receptor interaction plots*

768 Curated ligand–receptor dot plots were generated to visualise selected CellPhoneDB  
769 interactions within the cancer–MyoCAF–M2 macrophage niche. For these plots, each  
770 point represents a directed ligand–receptor interaction between a source and target cell  
771 population. Point size represents the CellPhoneDB interaction score, and point colour  
772 represents the CellPhoneDB significant mean.

773 The CellPhoneDB significant mean is an expression-based summary of interaction  
774 strength for statistically significant ligand–receptor pairs. It reflects the mean expression  
775 of the ligand in the source cell group and the receptor in the target cell group, with multi-  
776 subunit complexes represented by the limiting subunit. In the CellPhoneDB significant-  
777 means output, values are retained for interactions passing the permutation-based  
778 significance threshold, whereas non-significant interactions are not assigned a positive  
779 significant-mean value. Higher significant-mean values therefore indicate stronger  
780 expression support for a statistically significant interaction in a given source–target  
781 direction, but should be interpreted as a relative communication score rather than a  
782 direct biochemical measure of ligand–receptor binding.

783 Interactions were selected to highlight cancer-programme-specific communication with  
784 MyoCAFs and M2 macrophages. For each ligand–receptor pair, interaction strength was  
785 compared across the five cNMF cancer programmes. Interactions were retained if they  
786 were unique to a single cancer programme or if their interaction strength in one cancer  
787 programme was at least 1.5-fold higher than in the other cancer programmes. This  
788 selection strategy was used to identify ligand–receptor interactions preferentially  
789 associated with individual malignant transcriptional states.

790 MyoCAF–M2 macrophage interactions were summarised at the pathway level. Within  
791 each curated pathway class, interactions were ranked by CellPhoneDB significant mean,  
792 and up to the top 12 interactions per pathway were retained for visualisation. Additional  
793 biologically relevant interactions were manually retained where appropriate to aid  
794 interpretation of the MyoCAF–M2 macrophage niche. Dot plots were faceted by pathway  
795 and sender–receiver direction.

796

797 *Spatial-context differential expression of cancer cells in the MyoCAF–M2 macrophage*  
798 *niche*

799 To identify cancer-cell transcriptional changes associated with localisation in a  
800 MyoCAF–M2 macrophage niche, spatial-context differential expression analysis was  
801 performed on CosMx resection samples. Resection samples were analysed  
802 independently and stored as sample-specific Seurat objects. Final refined cell-type  
803 annotations and cNMF cancer-programme annotations were used as input. Cancer cells  
804 were defined as cells annotated as one of the five malignant cNMF programmes:  
805 Immune-primed, Proliferative, Invasive, Stress repair, or Stress adapted. Cells  
806 annotated as MyoCAF and M2 macrophage were used to define the niche of interest.  
807 Cell centroid coordinates were extracted from the CosMx metadata using global x and y  
808 pixel coordinates. Distances were converted to micrometres using a pixel size of 0.12µm.  
809 For each sample, radius-based neighbourhoods were constructed using `dbscan::frNN()`.  
810 For each cell, all neighbouring cells within the specified radius were identified, excluding  
811 the index cell itself. For cancer cells, the number of neighbouring MyoCAFs and M2  
812 macrophages within the radius was counted.

813 Each cancer cell was assigned to one of four spatial-context categories:

814

$$816 \quad \text{MyoCAF\_M2\_niche} = n_{\text{MyoCAF}} > 0 \cap n_{\text{M2 macrophage}} > 0$$

$$817 \quad \text{MyoCAF\_only} = n_{\text{MyoCAF}} > 0 \cap n_{\text{M2 macrophage}} = 0$$

$$818 \quad \text{M2\_only} = n_{\text{MyoCAF}} = 0 \cap n_{\text{M2 macrophage}} > 0$$

$$819 \quad \text{Neither} = n_{\text{MyoCAF}} = 0 \cap n_{\text{M2 macrophage}} = 0$$

815

820 The primary contrast for differential expression was cancer cells in the  
821 “MyoCAF\_M2\_niche” compared with cancer cells in the “Neither” context. This contrast  
822 was performed separately within each cNMF cancer programme.

823 For each cancer programme and spatial context, raw RNA counts were aggregated into  
824 sample-level pseudobulk profiles. Pseudobulk counts were generated by summing raw  
825 counts across cancer cells from the same sample, cancer programme, and spatial-  
826 context category. Contexts containing fewer than 10 cells in a given sample were  
827 excluded. Only samples with paired pseudobulk profiles for both “MyoCAF\_M2\_niche”

828 and “Neither” contexts were retained for the corresponding programme-level  
829 comparison. Programmes with fewer than three paired samples were not tested.  
830 Differential expression was performed using edgeR. Genes were initially filtered to retain  
831 genes with a total count of at least 10 and expression in at least two pseudobulk samples,  
832 followed by filterByExpr(). Library-size normalisation was performed using trimmed  
833 mean of M-values normalisation with calcNormFactors(). For each cancer programme,  
834 a quasi-likelihood negative binomial generalized linear model was fitted with sample  
835 identity and spatial context as covariates:

836

838 
$$\text{Expression} \sim \text{sample} + \text{spatial context}$$

837

839 The spatial-context coefficient estimated the log<sub>2</sub> fold change for MyoCAF\_M2\_niche  
840 versus Neither while accounting for paired sample structure. Dispersion was estimated  
841 using robust estimation, and differential expression was assessed using glmQLFit() and  
842 glmQLFTest(). P values were adjusted for multiple testing using the Benjamini-Hochberg  
843 false discovery rate procedure. Genes with FDR < 0.1 and absolute log<sub>2</sub> fold change ≥  
844 0.25 were considered significant for exploratory interpretation.

845

#### 846 *Niche-radius sensitivity analysis*

847 To assess the effect of neighbourhood radius on niche-associated differential  
848 expression, the spatial-context assignment and pseudobulk differential expression  
849 workflow were repeated across a series of candidate niche radii (15, 20, 25, 30, 35, 40,  
850 45, 50, 55, 60µM). For each radius, cancer cells were reassigned to  
851 “MyoCAF\_M2\_niche”, “MyoCAF\_only”, “M2\_only”, or “Neither” based on the presence  
852 of MyoCAFs and M2 macrophages within that distance. Programme-specific differential  
853 expression was then repeated for the “MyoCAF\_M2\_niche” versus “Neither” contrast.  
854 For each radius and cancer programme, the number of significant genes was counted  
855 using the threshold FDR < 0.1 and absolute log<sub>2</sub> fold change ≥ 0.25. These counts were  
856 plotted against niche radius to evaluate the stability of the transcriptional signal across  
857 neighbourhood definitions. The main downstream visualisations used the 25 µm niche  
858 definition.

859

860 *Gene-category summarisation and heatmap visualisation*

861 To summarise biological patterns in the spatial-context differential expression results,  
862 genes were grouped into manually curated categories. The primary categories shown  
863 were epithelial/glandular genes and stress/inflammatory genes. For each cancer  
864 programme and gene category, the number of significant genes was calculated using  
865  $FDR < 0.1$  and absolute  $\log_2$  fold change  $\geq 0.25$ . The mean  $\log_2$  fold change among  
866 significant genes in each category was also calculated. These values were visualised  
867 using a dot plot, where dot size represents the number of significant genes and colour  
868 represents the mean  $\log_2$  fold change among significant genes.

869 For heatmap visualisation, selected epithelial/glandular and stress/inflammatory genes  
870 were extracted from the differential expression results. Genes were retained for plotting  
871 if they were significant in at least one cancer programme. Heatmap values represent the  
872 edgeR  $\log_2$  fold change for “MyoCAF\_M2\_niche” versus “Neither” within each cancer  
873 programme. Positive values indicate higher expression in cancer cells located in the  
874 MyoCAF–M2 macrophage niche, whereas negative values indicate higher expression in  
875 cancer cells lacking nearby MyoCAFs and M2 macrophages. Values were capped for  
876 colour-scale visualisation. Significance symbols indicate genes passing the  $\log_2$  fold-  
877 change threshold of  $\geq 0.25$  together with FDR thresholds of  $< 0.1$ ,  $< 0.01$ , or  $< 0.001$ .
