# Supplementary material
Source: Research Square preprint supplement (doi:10.21203/rs.3.rs-10195315/v1)
Supplement: Supplementary file 3 [file a3cc11fad11068eafdcd7c19.pdf]

# 1 Supplementary Tables

2

3 **Supplementary Table S1** - Differentially expressed genes between cells in integrated  
4 single-cell RNA seq dataset

5

6 **Supplementary Table S2** - 3000 most variable genes used to identify cNMF modules,  
7 their cNMF weight in each programme, and which programme they are associated with

8

9 **Supplementary Table S3** - Gene sets used to score cells for each biological process in  
10 figure 1 radar plot

11

12 **Supplementary Table S4** - Cell type frequency for initial broad cell type annotation by  
13 sample

14

15 **Supplementary Table S5** - Assignment of cNMF programmes to all CosMx cancer cells  
16 and breakdown of ambiguous cancer cells after threshold removal

17

18 **Supplementary Table S6** - Moran's I spatial autocorrelation test scores

19

20 **Supplementary Table S7** - cNMF scores before and after chemotherapy

21

22 **Supplementary Table S8** - Differences in cNMF score after correction for sample  
23 sizes/cell numbers

24

25 **Supplementary Table S9** - Percentage of cell types within given distances of a cancer  
26 cell

27

28 **Supplementary Table S10** - Mean percentage of cell types within 50uM intervals of a  
29 cancer cell

30

31 **Supplementary Table S11** - Difference in immune cell frequency in tri cell niche with  
32 MyoCAF and Cancer compared to M2 macrophages (adjusted for cell abundance)

33

34 **Supplementary Table S12** - Percentage of cancer immune cells in a niche (radius of  
35 50uM) with a cancer cell and fibroblast subtype (corrected for cell type abundance)

36

37 **Supplementary Table S13** - Number of differentially expressed genes between niche  
38 cancer cells and non-niche cancer cells at 5 $\mu$ m radius increments
